# Supplementary material for: A nitroenolate approach to the synthesis of 4,5-disubstituted-2-aminoimidazoles. Pilot library assembly and screening for antibiotic and antibiofilm activity
Source: Royal Society of Chemistry journal article supplement (doi:10.1039/c001479f), 2010-01-01

# **A Nitro Enolate Approach to the Synthesis of 4,5-Disubstituted-2-Aminoimidazoles. Pilot Library Assembly and Screening for Antibiotic and Antibiofilm Activity.**

Zhaoming Su, Steven A. Rogers, W. Steve McCall, Alicia C. Smith, Sindhu  
Ravishankar, Trey Mullikin and Christian Melander<sup>\*</sup>

## **Supplementary Information**

### **Table of contents**

|                                                       |            |
|-------------------------------------------------------|------------|
| $\alpha$ -nitro ketones synthesis .....               | <b>S2</b>  |
| 2-aminoimidazole synthesis .....                      | S7         |
| Dispersion graphs .....                               | <b>S13</b> |
| Hemolysis graphs .....                                | S21        |
| NMR data for 4,5-disubstituted-2-aminoimidazole ..... | S23        |
| NMR data for $\alpha$ -nitro ketones .....            | <b>S63</b> |
| NMR data for $\alpha$ -bromo ketones .....            | S103       |
| NMR data for monosubstitued-2-aminoimidazole .....    | S107       |

## **$\alpha$ -nitro ketones synthesis**

**2-nitro-6-phenylhexan-3-one:** 4-Phenylbutyric acid (0.100 g, 0.61 mmol) and CDI (0.100 g, 0.61 mmol) were added together and then reacted with nitroethane (0.050 g, 0.67 mmol) and DBU (0.185 g, 1.22 mmol) according to the general procedure. Purification by column chromatography gave 0.063 g (47%) as a yellow oil:  $^1\text{H}$  NMR (400 MHz,  $\text{CDCl}_3$ )  $\delta$  7.30 (m, 2H), 7.16 (m, 3H), 5.19 (q,  $J = 6.8$  Hz, 1H), 2.64 (m, 4H), 1.98 (m, 2H), 1.69 (d,  $J = 7.6$  Hz, 3H) ppm;  $^{13}\text{C}$  NMR (100 MHz,  $\text{CDCl}_3$ )  $\delta$  199.6, 141.9, 128.8, 128.7, 126.5, 89.0, 38.4, 34.8, 24.8, 15.2 ppm; IR  $\nu_{\text{max}}$  ( $\text{cm}^{-1}$ ) 2922, 2851, 1730, 1559, 1454, 1118; HRMS (FAB) calcd for  $\text{C}_{12}\text{H}_{15}\text{NO}_3$  ( $\text{MNa}^+$ ) 244.0944, found 244.0940.

**5-nitro-1-phenylheptan-4-one:** 4-Phenylbutyric acid (0.100 g, 0.61 mmol) and CDI (0.100 g, 0.61 mmol) were added together and then reacted with nitropropane (0.054 g, 0.60 mmol) and DBU (0.093 g, 0.61 mmol) according to the general procedure. Purification by column chromatography gave 0.038 g (27%) as a yellow oil:  $^1\text{H}$  NMR (400 MHz,  $\text{CDCl}_3$ )  $\delta$  7.30 (m, 2H), 7.16 (m, 3H), 5.02 (dd,  $J = 4.8, 10.0$  Hz, 1H), 2.63 (m, 4H), 1.97 (m, 2H), 1.26 (m, 2H), 1.01 (t,  $J = 7.2$  Hz, 3H) ppm;  $^{13}\text{C}$  NMR (100 MHz,  $\text{CDCl}_3$ )  $\delta$  199.6, 141.1, 128.8, 128.7, 126.4, 95.8, 38.8, 34.8, 24.8, 23.5, 10.6 ppm; IR  $\nu_{\text{max}}$  ( $\text{cm}^{-1}$ ) 2918, 2849, 1730, 1559, 1454, 1368, 801, 744, 700; HRMS (FAB) calcd for  $\text{C}_{13}\text{H}_{17}\text{NO}_3$  ( $\text{MNa}^+$ ) 258.1101, found 258.1098.

**5-nitro-1-phenyloctan-4-one:** 4-Phenylbutyric acid (0.100 g, 0.61 mmol) and CDI (0.128 g, 0.79 mmol) were added together and then reacted with nitrobutane (0.069 g, 0.67 mmol) and DBU (0.139 g, 0.91 mmol) according to the general procedure. Purification by column chromatography gave 0.076 g (50%) as a yellow oil:  $^1\text{H}$  NMR (400 MHz,  $\text{CDCl}_3$ )  $\delta$  7.30 (m, 2H), 7.17 (m, 3H), 5.11 (dd,  $J = 4.4, 10.0$  Hz, 1H), 2.63 (m, 4H), 1.96 (m, 2H), 1.38 (m, 4H), 0.97 (t,  $J = 6.8$  Hz, 3H) ppm;  $^{13}\text{C}$  NMR (100 MHz,  $\text{CDCl}_3$ )  $\delta$  199.3, 141.1, 128.8, 128.7, 126.4, 94.3, 38.7, 34.8, 31.8, 24.8, 19.4, 13.6 ppm; IR  $\nu_{\text{max}}$  ( $\text{cm}^{-1}$ ) 2917, 2849, 1730, 1551, 1454, 1362, 1030, 746, 700; HRMS



(FAB) calcd for  $C_{14}H_{19}NO_3$  ( $MNa^+$ ) 272.1257, found 272.1251.

**5-nitro-1-phenylnonan-4-one:** 4-Phenylbutyric acid (0.100 g, 0.61 mmol) and CDI (0.128 g, 0.79 mmol) were added together and then reacted with nitropentane (0.078 g, 0.67 mmol) and DBU (0.185 g, 1.22 mmol) according to the general procedure. Purification by column chromatography gave 0.074 g (46%) as a yellow oil:  $^1H$  NMR (400 MHz,  $CDCl_3$ )  $\delta$  7.30 (m, 2H), 7.17 (m, 3H), 5.08 (dd,  $J$  = 4.4, 10.0 Hz, 1H), 2.63 (m, 4H), 1.96 (m, 2H), 1.33 (m, 6H), 0.91 (t,  $J$  = 6.8 Hz, 3H) ppm;  $^{13}C$  NMR (100 MHz,  $CDCl_3$ )  $\delta$  199.2, 141.1, 128.8, 128.7, 126.4, 94.5, 38.7, 34.8, 29.6, 28.1, 24.8, 22.2, 13.8 ppm; IR  $\nu_{max}$  ( $cm^{-1}$ ) 2918, 2849, 1730, 1559, 1454, 1363, 1020, 743, 699; HRMS (FAB) calcd for  $C_{15}H_{21}NO_3$  ( $MNa^+$ ) 286.1414, found 286.1414.

**5-nitro-1-phenyldecan-4-one:** 4-Phenylbutyric acid (0.100 g, 0.61 mmol) and CDI (0.128 g, 0.79 mmol) were added together and then reacted with nitrohexane (0.120 g, 0.91 mmol) and DBU (0.232 g, 1.52 mmol) according to the general procedure. Purification by column chromatography gave 0.038 g (23%) as a yellow oil:  $^1H$  NMR (300 MHz,  $CDCl_3$ )  $\delta$  7.30 (m, 2H), 7.16 (m, 3H), 5.08 (dd,  $J$  = 4.2, 9.9 Hz, 1H), 2.64 (m, 4H), 1.96 (m, 2H), 1.32 (m, 8H), 0.89 (t,  $J$  = 6.6 Hz, 3H) ppm;  $^{13}C$  NMR (100 MHz,  $CDCl_3$ )  $\delta$  199.3, 141.1, 128.8, 128.7, 126.4, 94.5, 38.7, 34.8, 31.2, 29.9, 25.7, 24.8, 22.4, 14.1 ppm; IR  $\nu_{max}$  ( $cm^{-1}$ ) 3027, 2928, 2859, 1731, 1559, 1455, 1363, 1030, 746, 700; HRMS (FAB) calcd for  $C_{16}H_{23}NO_3$  ( $MNa^+$ ) 300.1570, found 300.1580.

**2-nitro-7-phenylheptan-3-one:** 5-Phenylpentanoic acid (0.100 g, 0.56 mmol) and CDI (0.182 g, 1.12 mmol) were added together and then reacted with nitroethane (0.063 g, 0.84 mmol) and DBU (0.214 g, 1.40 mmol) according to the general procedure. Purification by column chromatography gave 0.046 g (35%) as a yellow oil:  $^1H$  NMR (400 MHz,  $CDCl_3$ )  $\delta$  7.28 (m, 2H), 7.17 (m, 3H), 5.20 (q,  $J$  = 6.8 Hz, 1H), 2.63 (m, 4H), 1.69 (d,  $J$  = 6.8 Hz, 3H), 1.66 (m, 4H) ppm;  $^{13}C$  NMR (100 MHz,  $CDCl_3$ )  $\delta$  199.6, 142.0, 128.6, 128.6, 126.1, 89.0, 39.1, 35.9, 30.8, 23.0, 15.2 ppm; IR  $\nu_{max}$  ( $cm^{-1}$ ) 3026, 2917, 2849, 1731, 1559, 1453, 1387, 1030, 748, 700; HRMS (FAB)

calcd for  $C_{13}H_{17}NO_3$  ( $MNa^+$ ) 258.1101, found 258.1099.

**3-nitro-8-phenyloctan-4-one:** 5-Phenylpentanoic acid (0.200 g, 1.12 mmol) and CDI (0.364 g, 2.24 mmol) were added together and then reacted with nitropropane (0.150 g, 1.68 mmol) and DBU (0.427 g, 2.81 mmol) according to the general procedure. Purification by column chromatography gave 0.078 g (28%) as a yellow oil:  $^1H$  NMR (400 MHz,  $CDCl_3$ )  $\delta$  7.28 (m, 2H), 7.17 (m, 3H), 5.04 (dd,  $J = 4.8, 10.0$  Hz, 1H), 2.62 (m, 4H), 1.65 (m, 6H), 1.02 (t,  $J = 7.2$  Hz, 3H) ppm;  $^{13}C$  NMR (100 MHz,  $CDCl_3$ )  $\delta$  199.2, 142.0, 128.6, 128.6, 126.1, 95.8, 38.5, 35.8, 30.8, 23.5, 23.0, 10.6 ppm; IR  $\nu_{max}$  ( $cm^{-1}$ ) 2917, 2849, 1730, 1559, 1458, 1369, 1029, 748, 700; HRMS (FAB) calcd for  $C_{14}H_{19}NO_3$  ( $MNa^+$ ) 272.1257, found 272.1256.

**6-nitro-1-phenylnonan-5-one:** 5-Phenylpentanoic acid (0.150 g, 0.84 mmol) and CDI (0.273 g, 1.68 mmol) were added together and then reacted with nitrobutane (0.130 g, 1.26 mmol) and DBU (0.320 g, 2.10 mmol) according to the general procedure. Purification by column chromatography gave 0.046 g (21%) as a yellow oil:  $^1H$  NMR (400 MHz,  $CDCl_3$ )  $\delta$  7.28 (m, 2H), 7.17 (m, 3H), 5.12 (dd,  $J = 4.8, 10.4$  Hz, 1H), 2.62 (m, 4H), 1.65 (m, 6H), 1.39 (m, 2H), 0.98 (t,  $J = 7.2$  Hz, 3H) ppm;  $^{13}C$  NMR (100 MHz,  $CDCl_3$ )  $\delta$  199.3, 142.0, 128.6, 128.6, 126.1, 94.3, 39.3, 35.8, 31.8, 30.7, 23.0, 19.4, 13.6 ppm; IR  $\nu_{max}$  ( $cm^{-1}$ ) 3027, 2918, 2849, 1730, 1559, 1454, 1375, 1030, 749, 700; HRMS (FAB) calcd for  $C_{15}H_{21}NO_3$  ( $MNa^+$ ) 286.1414, found 286.1410.

**6-nitro-1-phenyldecan-5-one:** 5-Phenylpentanoic acid (0.150 g, 0.84 mmol) and CDI (0.273 g, 1.68 mmol) were added together and then reacted with nitropentane (0.148 g, 1.26 mmol) and DBU (0.320 g, 2.10 mmol) according to the general procedure. Purification by column chromatography gave 0.054 g (23%) as a yellow oil:  $^1H$  NMR (400 MHz,  $CDCl_3$ )  $\delta$  7.28 (m, 2H), 7.17 (m, 3H), 5.10 (dd,  $J = 4.8, 10.0$  Hz, 1H), 2.62 (m, 4H), 1.65 (m, 6H), 1.35 (m, 4H), 0.92 (t,  $J = 7.2$  Hz, 3H) ppm;  $^{13}C$  NMR (100 MHz,  $CDCl_3$ )  $\delta$  199.3, 142.0, 128.6, 128.6, 126.1, 94.5, 39.4, 35.8, 30.7, 29.6, 28.1,

23.0, 22.2, 13.9 ppm; IR  $\nu_{\max}$  ( $\text{cm}^{-1}$ ) 3027, 2930, 2861, 1731, 1559, 1454, 1363, 1030, 748, 700; HRMS (FAB) calcd for  $\text{C}_{16}\text{H}_{23}\text{NO}_3$  ( $\text{MNa}^+$ ) 300.1570, found 300.1568.

**6-nitro-1-phenylundecan-5-one:** 5-Phenylpentanoic acid (0.150 g, 0.84 mmol) and CDI (0.273 g, 1.68 mmol) were added together and then reacted with nitrohexane (0.166 g, 1.26 mmol) and DBU (0.320 g, 2.10 mmol) according to the general procedure. Purification by column chromatography gave 0.060 g (25%) as a yellow oil:  $^1\text{H}$  NMR (400 MHz,  $\text{CDCl}_3$ )  $\delta$  7.30 (m, 2H), 7.17 (m, 3H), 5.10 (dd,  $J = 4.4, 10.0$  Hz, 1H), 2.62 (m, 4H), 1.64 (m, 6H), 1.32 (m, 6H), 0.89 (t,  $J = 7.6$  Hz, 3H) ppm;  $^{13}\text{C}$  NMR (100 MHz,  $\text{CDCl}_3$ )  $\delta$  199.3, 142.0, 128.6, 128.6, 126.1, 94.6, 39.4, 35.8, 31.2, 30.8, 29.9, 25.7, 23.0, 22.4, 14.1 ppm; IR  $\nu_{\max}$  ( $\text{cm}^{-1}$ ) 3027, 2930, 2859, 1731, 1559, 1454, 1363, 1030, 748, 700; HRMS (FAB) calcd for  $\text{C}_{17}\text{H}_{25}\text{NO}_3$  ( $\text{MNa}^+$ ) 314.1727, found 314.1723.

**6-nitro-1-phenyldodecan-5-one:** 5-Phenylpentanoic acid (0.150 g, 0.84 mmol) and CDI (0.273 g, 1.68 mmol) were added together and then reacted with nitroheptane (0.183 g, 1.26 mmol) and DBU (0.320 g, 2.10 mmol) according to the general procedure. Purification by column chromatography gave 0.080 g (31%) as a yellow oil:  $^1\text{H}$  NMR (400 MHz,  $\text{CDCl}_3$ )  $\delta$  7.26 (m, 2H), 7.17 (m, 3H), 5.10 (dd,  $J = 4.8, 10.4$  Hz, 1H), 2.62 (m, 4H), 1.64 (m, 6H), 1.28 (m, 8H), 0.88 (t,  $J = 7.2$  Hz, 3H) ppm;  $^{13}\text{C}$  NMR (100 MHz,  $\text{CDCl}_3$ )  $\delta$  199.3, 142.0, 128.6, 128.6, 126.1, 94.6, 39.4, 35.8, 31.5, 30.8, 29.9, 28.7, 26.0, 23.0, 22.7, 14.2 ppm; IR  $\nu_{\max}$  ( $\text{cm}^{-1}$ ) 2926, 2857, 1731, 1559, 1454, 1363, 1030, 749, 700; HRMS (FAB) calcd for  $\text{C}_{18}\text{H}_{27}\text{NO}_3$  ( $\text{MNa}^+$ ) 328.1883, found 328.1879.

**5-nitro-12-phenyldodecan-6-one:** 7-Phenylheptanoic acid (0.150 g, 0.73 mmol) and CDI (0.236 g, 1.45 mmol) were added together and then reacted with nitropentane (0.128 g, 1.09 mmol) and DBU (0.277 g, 1.82 mmol) according to the general procedure. Purification by column chromatography gave 0.044 g (20%) as a yellow oil:  $^1\text{H}$  NMR (400 MHz,  $\text{CDCl}_3$ )  $\delta$  7.27 (m, 2H), 7.18 (m, 3H), 5.11 (dd,  $J = 4.4, 10.0$

Hz, 1H), 2.60 (m, 4H), 1.61 (m, 6H), 1.33 (m, 8H) 0.92 (t,  $J = 6.8$  Hz, 3H) ppm;  $^{13}\text{C}$  NMR (100 MHz,  $\text{CDCl}_3$ )  $\delta$  199.5, 142.8, 128.6, 128.5, 126.0, 94.5, 39.5, 36.0, 31.4, 29.6, 29.1, 28.9, 28.1, 23.3, 22.2, 13.9 ppm; IR  $\nu_{\text{max}}$  ( $\text{cm}^{-1}$ ) 3026, 2931, 2858, 1732, 1555, 1454, 1364, 1030, 748, 699; HRMS (FAB) calcd for  $\text{C}_{18}\text{H}_{27}\text{NO}_3$  ( $\text{MNa}^+$ ) 328.1883, found 328.1879.

**8-nitro-1-phenyltridecan-7-one:** 7-Phenylheptanoic acid (0.150 g, 0.73 mmol) and CDI (0.236 g, 1.45 mmol) were added together and then reacted with nitrohexane (0.143 g, 1.09 mmol) and DBU (0.277 g, 1.82 mmol) according to the general procedure. Purification by column chromatography gave 0.076 g (32%) as a yellow oil:  $^1\text{H}$  NMR (400 MHz,  $\text{CDCl}_3$ )  $\delta$  7.28 (m, 2H), 7.18 (m, 3H), 5.12 (dd,  $J = 4.8, 10.4$  Hz, 1H), 2.60 (m, 4H), 1.61 (m, 6H), 1.33 (m, 10H) 0.90 (t,  $J = 6.4$  Hz, 3H) ppm;  $^{13}\text{C}$  NMR (100 MHz,  $\text{CDCl}_3$ )  $\delta$  199.5, 142.8, 128.6, 128.5, 125.9, 94.6, 39.5, 36.0, 31.4, 31.2, 29.9, 29.1, 28.9, 25.7, 23.3, 22.5, 14.1 ppm; IR  $\nu_{\text{max}}$  ( $\text{cm}^{-1}$ ) 3027, 2931, 2858, 1731, 1554, 1454, 1366, 1099, 747, 699; HRMS (FAB) calcd for  $\text{C}_{19}\text{H}_{29}\text{NO}_3$  ( $\text{MNa}^+$ ) 342.2040, found 342.2038.

**8-nitro-1-phenyltetradecan-7-one:** 7-Phenylheptanoic acid (0.150 g, 0.73 mmol) and CDI (0.236 g, 1.45 mmol) were added together and then reacted with nitroheptane (0.158 g, 1.09 mmol) and DBU (0.277 g, 1.82 mmol) according to the general procedure. Purification by column chromatography gave 0.096 g (40%) as a yellow oil:  $^1\text{H}$  NMR (400 MHz,  $\text{CDCl}_3$ )  $\delta$  7.28 (m, 2H), 7.18 (m, 3H), 5.12 (dd,  $J = 4.4, 10.0$  Hz, 1H), 2.60 (m, 4H), 1.62 (m, 6H), 1.34 (m, 12H) 0.90 (t,  $J = 7.2$  Hz, 3H) ppm;  $^{13}\text{C}$  NMR (100 MHz,  $\text{CDCl}_3$ )  $\delta$  199.5, 142.8, 128.6, 128.5, 125.9, 94.6, 39.5, 36.0, 31.5, 31.4, 29.9, 29.1, 28.9, 28.8, 26.0, 23.3, 22.7, 14.2 ppm; IR  $\nu_{\text{max}}$  ( $\text{cm}^{-1}$ ) 3027, 2930, 2858, 1732, 1559, 1454, 1367, 1030, 748, 700; HRMS (FAB) calcd for  $\text{C}_{20}\text{H}_{31}\text{NO}_3$  ( $\text{MNa}^+$ ) 356.2196, found 356.2198.

## 2-aminoimidazole synthesis

**5-methyl-4-(3-phenylpropyl)-1H-imidazol-2-amine:** 2-Nitro-6-phenylhexan-3-one (0.063 g, 0.28 mmol) reacted with concentrated HCl (1.40 mmol) and palladium, 5 wt. % on activated carbon (0.121 g, 0.057 mmol) under H<sub>2</sub>, then reacted with cyanamide (0.060 g, 1.4 mmol) according to the general procedure. Purification by column chromatography gave 0.019 g (31%) over two steps as a yellow oil: <sup>1</sup>H NMR (400 MHz, CD<sub>3</sub>OD) δ 7.25 (m, 2H), 7.18 (m, 3H), 2.63 (t, *J* = 7.2 Hz, 2H), 2.46 (t, *J* = 7.6 Hz, 2H), 2.00 (s, 3H) 1.88 (m, 2H) ppm; <sup>13</sup>C NMR (100 MHz, CD<sub>3</sub>OD) δ 146.3, 141.6, 128.2, 128.2, 125.8, 121.6, 117.7, 34.8, 30.3, 22.6, 7.5 ppm; IR ν<sub>max</sub> (cm<sup>-1</sup>) 3313, 3169, 2941, 2795, 1680, 1624, 1453, 1181, 1018, 750, 700; HRMS (FAB) calcd for C<sub>13</sub>H<sub>17</sub>N<sub>3</sub> (MH<sup>+</sup>) 216.1495, found 216.1502.

**5-ethyl-4-(3-phenylpropyl)-1H-imidazol-2-amine:** 5-Nitro-1-phenylheptan-4-one (0.049 g, 0.21 mmol) reacted with concentrated HCl (1.04 mmol) and palladium, 5 wt. % on activated carbon (0.089 g, 0.040 mmol) under H<sub>2</sub>, then reacted with cyanamide (0.044 g, 1.04 mmol) according to the general procedure. Purification by column chromatography gave 0.026 g (55%) over two steps as a yellow oil: <sup>1</sup>H NMR (400 MHz, CD<sub>3</sub>OD) δ 7.23 (m, 2H), 7.18 (m, 3H), 2.62 (t, *J* = 7.2 Hz, 2H), 2.42 (m, 4H), 1.87 (m, 2H), 1.14 (t, *J* = 7.8 Hz, 3H) ppm; <sup>13</sup>C NMR (75 MHz, CD<sub>3</sub>OD) δ 146.4, 141.6, 128.4, 128.3, 125.8, 123.6, 121.0, 34.9, 30.7, 22.6, 16.6, 13.1 ppm; IR ν<sub>max</sub> (cm<sup>-1</sup>) 3340, 3026, 2930, 2850, 1679, 1603, 1453, 1030, 748, 699; HRMS (FAB) calcd for C<sub>14</sub>H<sub>19</sub>N<sub>3</sub> (MH<sup>+</sup>) 230.1652, found 230.1654.

**4-(3-phenylpropyl)-5-propyl-1H-imidazol-2-amine:** 5-Nitro-1-phenyloctan-4-one (0.076 g, 0.30 mmol) reacted with concentrated HCl (1.52 mmol) and palladium, 5 wt. % on activated carbon (0.130 g, 0.061 mmol) under H<sub>2</sub>, then reacted with cyanamide (0.064 g, 1.52 mmol) according to the general procedure. Purification by column chromatography gave 0.030 g (41%) over two steps as a yellow oil: <sup>1</sup>H NMR (300

MHz, CD<sub>3</sub>OD)  $\delta$  7.23 (m, 2H), 7.19 (m, 3H), 2.64 (t,  $J$  = 7.2 Hz, 2H), 2.46 (t,  $J$  = 7.5 Hz, 2H), 2.36 (t,  $J$  = 7.5 Hz, 2H), 1.87 (m, 2H), 1.56 (m, 2H), 0.90 (t,  $J$  = 7.2 Hz, 3H) ppm; <sup>13</sup>C NMR (100 MHz, CD<sub>3</sub>OD)  $\delta$  146.4, 141.6, 128.4, 128.3, 125.8, 122.0, 121.9, 34.9, 30.7, 25.0, 22.6, 22.2, 12.6 ppm; IR  $\nu_{\text{max}}$  (cm<sup>-1</sup>) 3157, 2929, 1677, 1453, 1181, 1028, 745, 698; HRMS (FAB) calcd for C<sub>15</sub>H<sub>21</sub>N<sub>3</sub> (MH<sup>+</sup>) 244.1808, found 244.1809.

**5-butyl-4-(3-phenylpropyl)-1H-imidazol-2-amine:** 5-Nitro-1-phenylnonan-4-one: (0.074 g, 0.28 mmol) reacted with concentrated HCl (1.40 mmol) and palladium, 5 wt. % on activated carbon (0.120 g, 0.056 mmol) under H<sub>2</sub>, then reacted with cyanamide (0.059 g, 1.40 mmol) according to the general procedure. Purification by column chromatography gave 0.054 g (75%) over two steps as a yellow oil: <sup>1</sup>H NMR (400 MHz, CD<sub>3</sub>OD)  $\delta$  7.26 (m, 2H), 7.19 (m, 3H), 2.64 (t,  $J$  = 7.6 Hz, 2H), 2.46 (t,  $J$  = 7.2 Hz, 2H), 2.38 (t,  $J$  = 7.6 Hz, 2H), 1.88 (m, 2H), 1.50 (m, 2H), 1.32 (m, 2H), 0.92 (t,  $J$  = 7.2 Hz, 3H) ppm; <sup>13</sup>C NMR (100 MHz, CD<sub>3</sub>OD)  $\delta$  146.4, 141.6, 128.4, 128.3, 125.8, 122.2, 121.7, 34.9, 31.1, 30.7, 22.8, 22.6, 21.9, 12.9 ppm; IR  $\nu_{\text{max}}$  (cm<sup>-1</sup>) 3318, 3169, 2929, 1680, 1453, 1181, 1021, 747, 700; HRMS (FAB) calcd for C<sub>16</sub>H<sub>23</sub>N<sub>3</sub> (MH<sup>+</sup>) 258.1965, found 258.1971.

**5-pentyl-4-(3-phenylpropyl)-1H-imidazol-2-amine:** 5-Nitro-1-phenyldecan-4-one (0.031 g, 0.11 mmol) reacted with concentrated HCl (0.55 mmol) and palladium, 5 wt. % on activated carbon (0.048 g, 0.022 mmol) under H<sub>2</sub>, then reacted with cyanamide (0.024 g, 0.55 mmol) according to the general procedure. Purification by column chromatography gave 0.016 g (53%) over two steps as a yellow oil: <sup>1</sup>H NMR (400 MHz, CD<sub>3</sub>OD)  $\delta$  7.25 (m, 2H), 7.18 (m, 3H), 2.63 (t,  $J$  = 7.6 Hz, 2H), 2.45 (t,  $J$  = 8.0 Hz, 2H), 2.36 (t,  $J$  = 7.6 Hz, 2H), 1.88 (m, 2H), 1.52 (m, 2H), 1.27 (m, 4H), 0.89 (t,  $J$  = 7.2 Hz, 3H) ppm; <sup>13</sup>C NMR (100 MHz, CD<sub>3</sub>OD)  $\delta$  146.4, 141.6, 128.7, 128.3, 125.9, 122.2, 121.7, 34.9, 31.0, 30.7, 28.6, 23.1, 22.6, 22.2, 13.2 ppm; IR  $\nu_{\text{max}}$  (cm<sup>-1</sup>) 3157, 2929, 2858, 1677, 1453, 1030, 748, 700; HRMS (FAB) calcd for C<sub>17</sub>H<sub>25</sub>N<sub>3</sub> (MH<sup>+</sup>) 272.2121, found 272.2125.

**5-methyl-4-(4-phenylbutyl)-1H-imidazol-2-amine:** 2-Nitro-7-phenylheptan-3-one (0.045 g, 0.19 mmol) reacted with concentrated HCl (0.95 mmol) and palladium, 5 wt. % on activated carbon (0.081 g, 0.040 mmol) under H<sub>2</sub>, then reacted with cyanamide (0.040 g, 0.95 mmol) according to the general procedure. Purification by column chromatography gave 0.036 g (82%) over two steps as a yellow oil: <sup>1</sup>H NMR (400 MHz, CD<sub>3</sub>OD) δ 7.24 (m, 2H), 7.17 (m, 3H), 2.63 (t, *J* = 7.2 Hz, 2H), 2.46 (t, *J* = 7.6 Hz, 2H), 2.04 (s, 3H) 1.58 (m, 4H) ppm; <sup>13</sup>C NMR (100 MHz, CD<sub>3</sub>OD) δ 146.3, 142.2, 128.2, 128.2, 125.6, 121.8, 117.6, 35.3, 30.7, 28.3, 22.9, 7.5 ppm; IR ν<sub>max</sub> (cm<sup>-1</sup>) 3164, 2926, 1680, 1453, 1030, 749; HRMS (FAB) calcd for C<sub>14</sub>H<sub>19</sub>N<sub>3</sub> (MH<sup>+</sup>) 230.1652, found 230.1657.

**5-ethyl-4-(4-phenylbutyl)-1H-imidazol-2-amine:** 3-Nitro-8-phenyloctan-4-one: (0.078 g, 0.31 mmol) reacted with concentrated HCl (1.55 mmol) and palladium, 5 wt. % on activated carbon (0.133 g, 0.063 mmol) under H<sub>2</sub>, then reacted with cyanamide (0.066 g, 1.56 mmol) according to the general procedure. Purification by column chromatography gave 0.051 g (67%) over two steps as a yellow oil: <sup>1</sup>H NMR (400 MHz, CD<sub>3</sub>OD) δ 7.23 (m, 2H), 7.16 (m, 3H), 2.62 (t, *J* = 7.6 Hz, 2H), 2.45 (m, 4H), 1.58 (m, 4H), 1.13 (t, *J* = 7.6 Hz, 3H) ppm; <sup>13</sup>C NMR (100 MHz, CD<sub>3</sub>OD) δ 146.4, 142.2, 128.3, 128.2, 125.6, 123.5, 121.2, 35.3, 30.7, 28.6, 22.9, 16.6, 13.2 ppm; IR ν<sub>max</sub> (cm<sup>-1</sup>) 3157, 2936, 2790, 1680, 1454, 1202, 1030, 749, 700; HRMS (FAB) calcd for C<sub>15</sub>H<sub>21</sub>N<sub>3</sub> (MH<sup>+</sup>) 244.1808, found 244.1811.

**4-(4-phenylbutyl)-5-propyl-1H-imidazol-2-amine:** 6-Nitro-1-phenylnonan-5-one (0.046 g, 0.17 mmol) reacted with concentrated HCl (0.85 mmol) and palladium, 5 wt. % on activated carbon (0.074 g, 0.035 mmol) under H<sub>2</sub>, then reacted with cyanamide (0.037 g, 0.87 mmol) according to the general procedure. Purification by column chromatography gave 0.032 g (71%) over two steps as a yellow oil: <sup>1</sup>H NMR (400 MHz, CD<sub>3</sub>OD) δ 7.23 (m, 2H), 7.17 (m, 3H), 2.62 (t, *J* = 7.2 Hz, 2H), 2.44 (t, *J* = 7.6 Hz, 2H), 2.39 (t, *J* = 7.6 Hz, 2H), 1.56 (m, 6H), 0.91 (t, *J* = 7.2 Hz, 3H) ppm; <sup>13</sup>C NMR (100 MHz, CD<sub>3</sub>OD) δ 146.4, 142.2, 128.2, 128.2, 125.7, 122.1, 121.9, 35.3,

30.7, 28.5, 25.0, 23.0, 22.2, 12.6 ppm; IR  $\nu_{\max}$  ( $\text{cm}^{-1}$ ) 3161, 2934, 2793, 1680, 1454, 1202, 1181, 1020, 749, 700; HRMS (FAB) calcd for  $\text{C}_{16}\text{H}_{23}\text{N}_3$  ( $\text{MH}^+$ ) 258.1965, found 258.1977.

**5-butyl-4-(4-phenylbutyl)-1H-imidazol-2-amine:** 6-Nitro-1-phenyldecan-5-one (0.047 g, 0.17 mmol) reacted with concentrated HCl (0.85 mmol) and palladium, 5 wt. % on activated carbon (0.072 g, 0.034 mmol) under  $\text{H}_2$ , then reacted with cyanamide (0.036 g, 0.85 mmol) according to the general procedure. Purification by column chromatography gave 0.020 g (43%) over two steps as a yellow oil:  $^1\text{H}$  NMR (400 MHz,  $\text{CD}_3\text{OD}$ )  $\delta$  7.24 (m, 2H), 7.17 (m, 3H), 2.64 (t,  $J = 6.8$  Hz, 2H), 2.44 (m, 4H), 1.65 (m, 6H), 1.32 (m, 2H), 0.92 (t,  $J = 7.2$  Hz, 3H) ppm;  $^{13}\text{C}$  NMR (100 MHz,  $\text{CD}_3\text{OD}$ )  $\delta$  146.4, 142.2, 128.3, 128.2, 125.8, 122.2, 121.7, 35.3, 31.2, 30.7, 28.5, 22.9, 22.8, 21.9, 12.9 ppm; IR  $\nu_{\max}$  ( $\text{cm}^{-1}$ ) 3165, 2929, 1680, 1453, 1030; HRMS (FAB) calcd for  $\text{C}_{17}\text{H}_{25}\text{N}_3$  ( $\text{MH}^+$ ) 272.2121, found 272.2132.

**5-pentyl-4-(4-phenylbutyl)-1H-imidazol-2-amine:** 6-Nitro-1-phenylundecan-5-one (0.060 g, 0.21 mmol) reacted with concentrated HCl (1.05 mmol) and palladium, 5 wt. % on activated carbon (0.088 g, 0.040 mmol) under  $\text{H}_2$ , then reacted with cyanamide (0.043 g, 1.03 mmol) according to the general procedure. Purification by column chromatography gave 0.064 g (97%) over two steps as a yellow oil:  $^1\text{H}$  NMR (400 MHz,  $\text{CD}_3\text{OD}$ )  $\delta$  7.24 (m, 2H), 7.17 (m, 3H), 2.64 (t,  $J = 6.8$  Hz, 2H), 2.45 (m, 4H), 1.52 (m, 6H), 1.30 (m, 4H), 0.89 (t,  $J = 7.2$  Hz, 3H) ppm;  $^{13}\text{C}$  NMR (100 MHz,  $\text{CD}_3\text{OD}$ )  $\delta$  146.4, 142.2, 128.2, 128.2, 125.7, 122.1, 121.9, 35.3, 31.1, 30.7, 28.7, 28.5, 23.0, 23.0, 22.2, 13.2 ppm; IR  $\nu_{\max}$  ( $\text{cm}^{-1}$ ) 3159, 2929, 2858, 1680, 1453, 1202, 1181, 1030, 749, 699; HRMS (FAB) calcd for  $\text{C}_{18}\text{H}_{27}\text{N}_3$  ( $\text{MH}^+$ ) 286.2278, found 286.2283.

**5-hexyl-4-(4-phenylbutyl)-1H-imidazol-2-amine:** 6-Nitro-1-phenyldodecan-5-one (0.040 g, 0.13 mmol) reacted with concentrated HCl (0.65 mmol) and palladium, 5 wt. % on activated carbon (0.056 g, 0.026 mmol) under  $\text{H}_2$ , then reacted with cyanamide (0.028 g, 0.65 mmol) according to the general procedure. Purification by column



chromatography gave 0.030 g (77%) over two steps as a yellow oil:  $^1\text{H}$  NMR (400 MHz,  $\text{CD}_3\text{OD}$ )  $\delta$  7.24 (m, 2H), 7.16 (m, 3H), 2.63 (t,  $J = 7.2$  Hz, 2H), 2.45 (m, 4H), 1.60 (m, 6H), 1.28 (m, 6H), 0.88 (t,  $J = 6.8$  Hz, 3H) ppm;  $^{13}\text{C}$  NMR (100 MHz,  $\text{CD}_3\text{OD}$ )  $\delta$  146.4, 142.2, 128.2, 128.2, 125.7, 122.1, 121.8, 35.3, 31.5, 30.7, 29.0, 28.7, 28.5, 23.1, 23.0, 22.4, 13.3 ppm; IR  $\nu_{\text{max}}$  ( $\text{cm}^{-1}$ ) 3166, 2930, 2857, 1680, 1454, 1202, 1181, 1029, 748, 699; HRMS (FAB) calcd for  $\text{C}_{19}\text{H}_{29}\text{N}_3$  ( $\text{MH}^+$ ) 300.2434, found 300.2435.

**5-butyl-4-(6-phenylhexyl)-1H-imidazol-2-amine:** 5-Nitro-12-phenyldodecan-6-one (0.044 g, 0.14 mmol) reacted with concentrated HCl (0.70 mmol) and palladium, 5 wt. % on activated carbon (0.061 g, 0.029 mmol) under  $\text{H}_2$ , then reacted with cyanamide (0.030 g, 0.72 mmol) according to the general procedure. Purification by column chromatography gave 0.022 g (51%) over two steps as a yellow oil:  $^1\text{H}$  NMR (400 MHz,  $\text{CD}_3\text{OD}$ )  $\delta$  7.23 (m, 2H), 7.15 (m, 3H), 2.60 (t,  $J = 7.2$  Hz, 2H), 2.42 (m, 4H), 1.54 (m, 6H), 1.35 (m, 6H), 0.94 (t,  $J = 7.6$  Hz, 3H) ppm;  $^{13}\text{C}$  NMR (100 MHz,  $\text{CD}_3\text{OD}$ )  $\delta$  146.4, 142.6, 128.2, 128.1, 125.5, 122.1, 122.0, 35.6, 31.3, 31.2, 28.8, 28.7, 28.6, 23.0, 22.8, 21.9, 13.0 ppm; IR  $\nu_{\text{max}}$  ( $\text{cm}^{-1}$ ) 3160, 2928, 2856, 1680, 1453, 1030, 747, 700; HRMS (FAB) calcd for  $\text{C}_{19}\text{H}_{29}\text{N}_3$  ( $\text{MH}^+$ ) 300.2434, found 300.2437.

**5-pentyl-4-(6-phenylhexyl)-1H-imidazol-2-amine:** 8-Nitro-1-phenyltridecan-7-one: (0.076 g, 0.24 mmol) reacted with concentrated HCl (1.20 mmol) and palladium, 5 wt. % on activated carbon (0.101 g, 0.048 mmol) under  $\text{H}_2$ , then reacted with cyanamide (0.050 g, 1.19 mmol) according to the general procedure. Purification by column chromatography gave 0.031 g (41%) over two steps as a yellow oil:  $^1\text{H}$  NMR (400 MHz,  $\text{CD}_3\text{OD}$ )  $\delta$  7.24 (m, 2H), 7.16 (m, 3H), 2.60 (t,  $J = 7.6$  Hz, 2H), 2.42 (m, 4H), 1.55 (m, 6H), 1.35 (m, 8H), 0.91 (t,  $J = 6.8$  Hz, 3H) ppm;  $^{13}\text{C}$  NMR (100 MHz,  $\text{CD}_3\text{OD}$ )  $\delta$  146.4, 142.6, 128.2, 128.1, 125.5, 122.1, 122.0, 35.6, 31.4, 31.1, 28.8, 28.7, 28.7, 28.6, 23.0, 23.0, 22.2, 13.2 ppm; IR  $\nu_{\text{max}}$  ( $\text{cm}^{-1}$ ) 3169, 2928, 1680, 1453, 1202, 1030, 745, 699; HRMS (FAB) calcd for  $\text{C}_{20}\text{H}_{31}\text{N}_3$  ( $\text{MH}^+$ ) 314.2591, found 314.2596.

**5-hexyl-4-(6-phenylhexyl)-1H-imidazol-2-amine:** 8-Nitro-1-phenyltetradecan-7-one (0.096 g, 0.29 mmol) reacted with concentrated HCl (1.45 mmol) and palladium, 5 wt. % on activated carbon (0.123 g, 0.058 mmol) under H<sub>2</sub>, then reacted with cyanamide (0.061 g, 1.44 mmol) according to the general procedure. Purification by column chromatography gave 0.019 g (20%) over two steps as a yellow oil: <sup>1</sup>H NMR (300 MHz, CDCl<sub>3</sub>) δ 7.24 (m, 2H), 7.16 (m, 3H), 2.58 (t, *J* = 7.5 Hz, 2H), 2.34 (m, 4H), 1.50 (m, 6H), 1.26 (m, 10H), 0.86 (t, *J* = 6.6 Hz, 3H) ppm; <sup>13</sup>C NMR (100 MHz, CD<sub>3</sub>OD) δ 146.4, 142.6, 128.2, 128.1, 125.5, 122.1, 122.0, 35.6, 31.5, 31.4, 29.0, 28.8, 28.7, 28.6, 28.6, 23.1, 23.0, 22.5, 13.2 ppm; IR ν<sub>max</sub> (cm<sup>-1</sup>) 3158, 2928, 2857, 1680, 1454, 1202, 1029, 748, 699; HRMS (FAB) calcd for C<sub>20</sub>H<sub>31</sub>N<sub>3</sub> (MH<sup>+</sup>) 328.2747, found 328.2753.

## Dispersion Graphs:

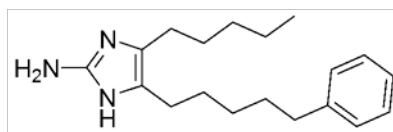

*L. anguillarum*

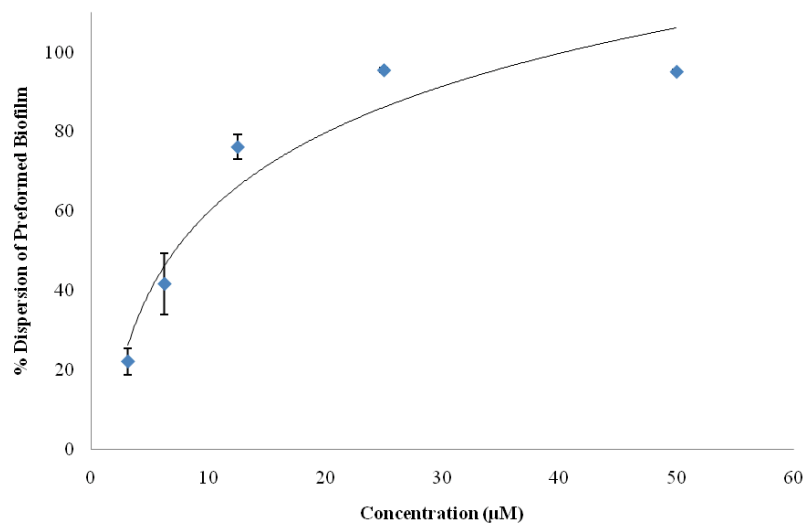

*R. salixigens*

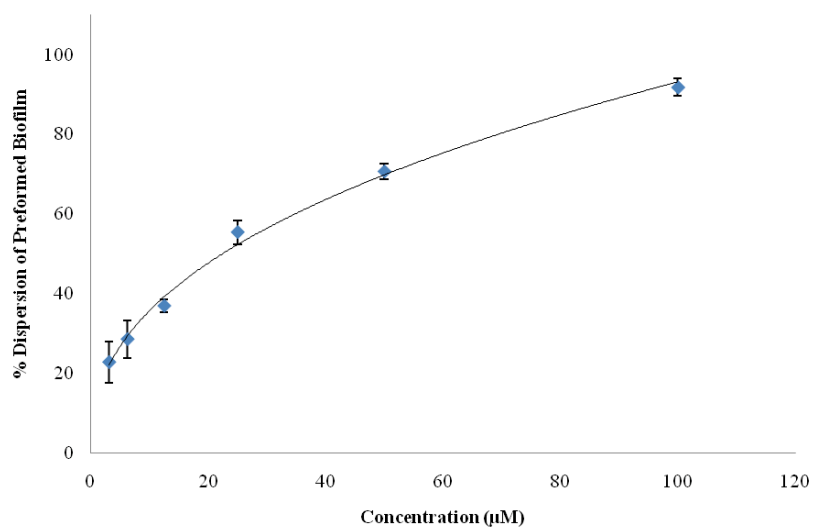

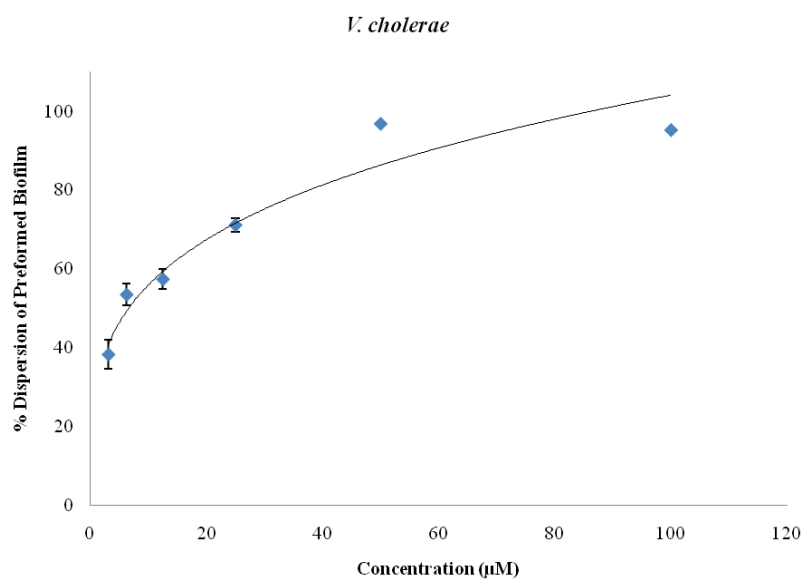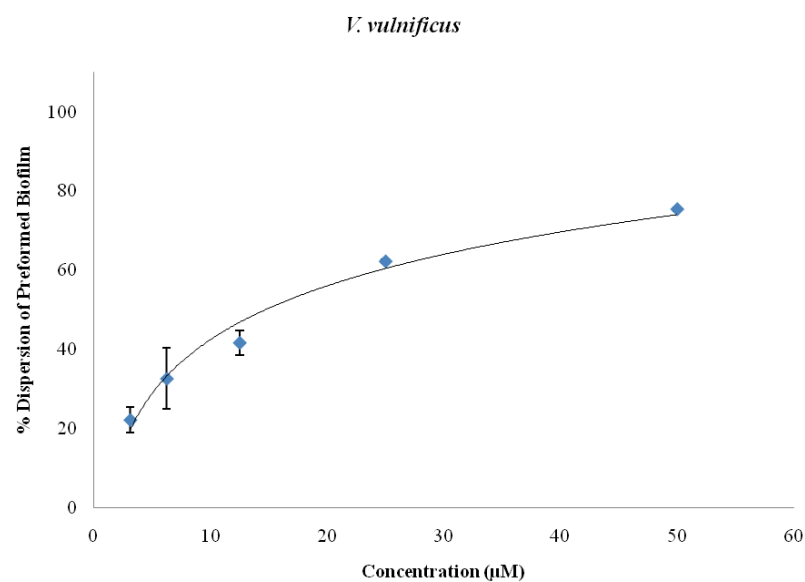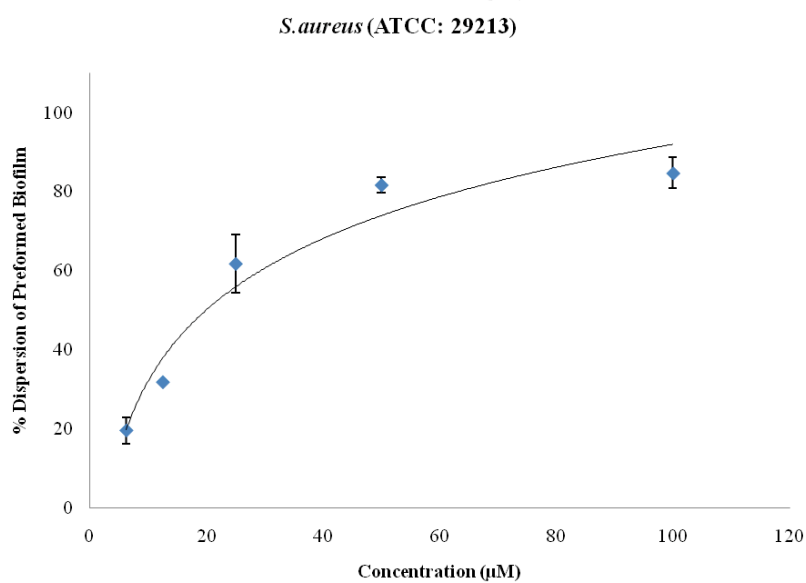

*S. epidermidis*

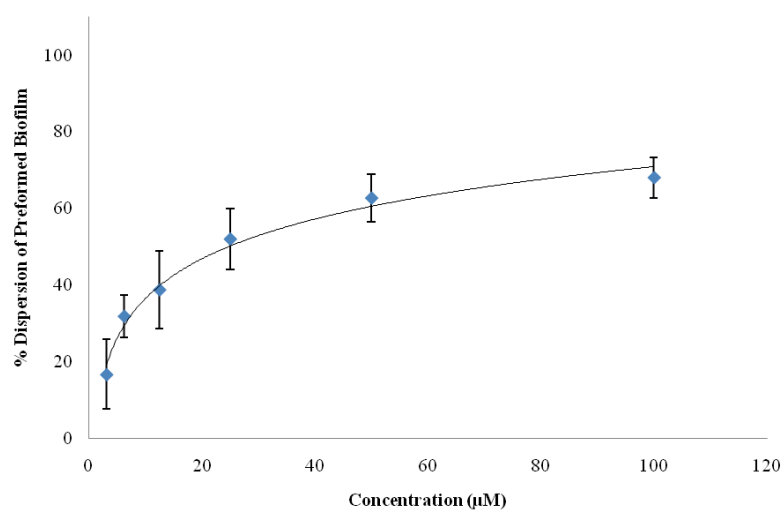

MRSA

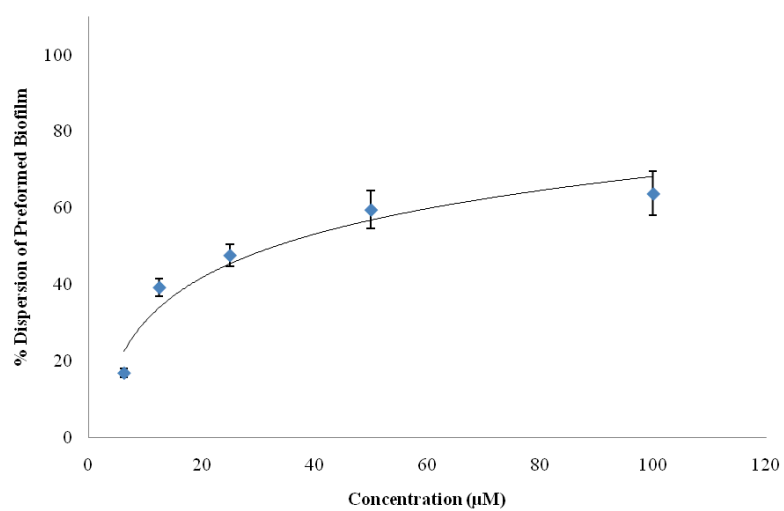

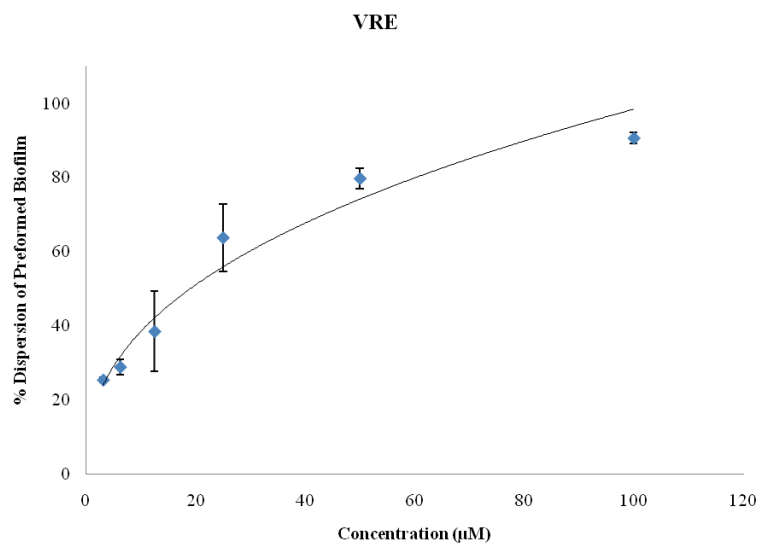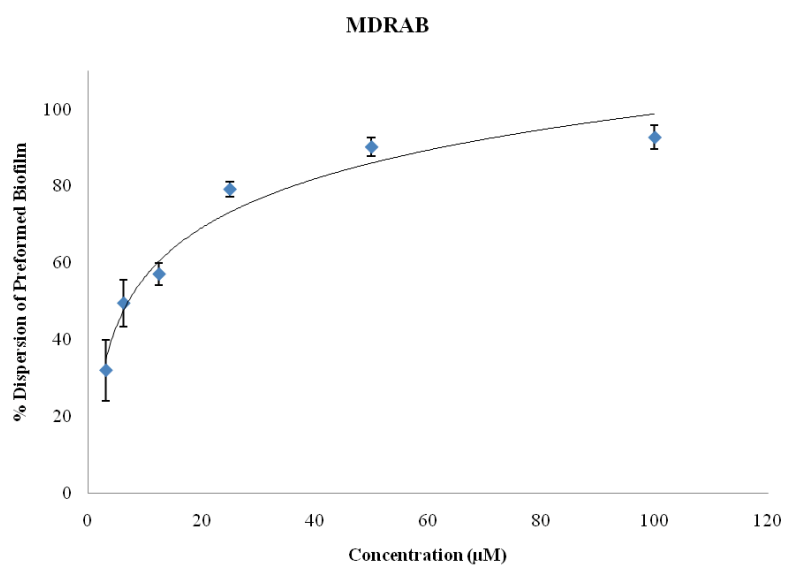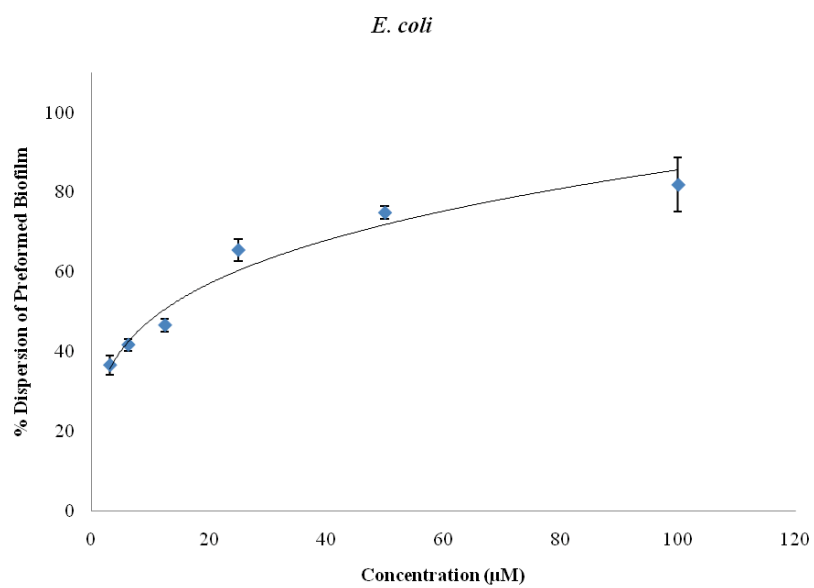

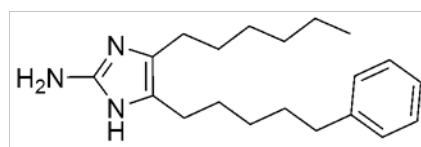

*V. cholerae*

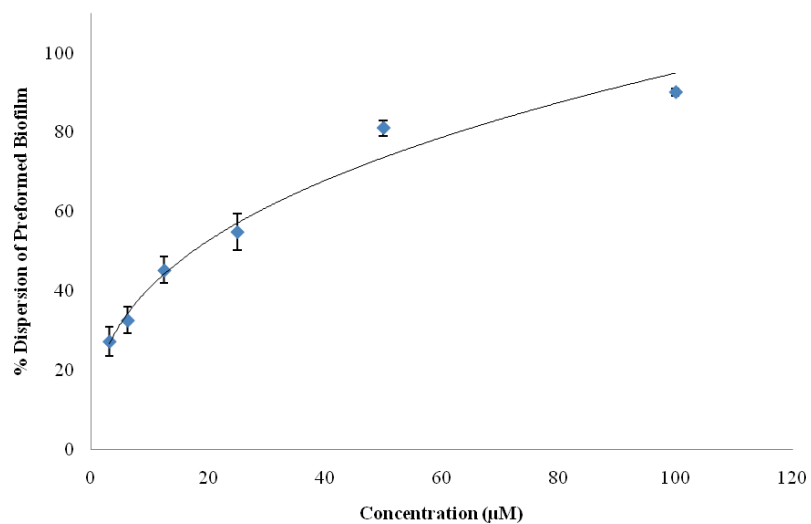

*V. vulnificus*

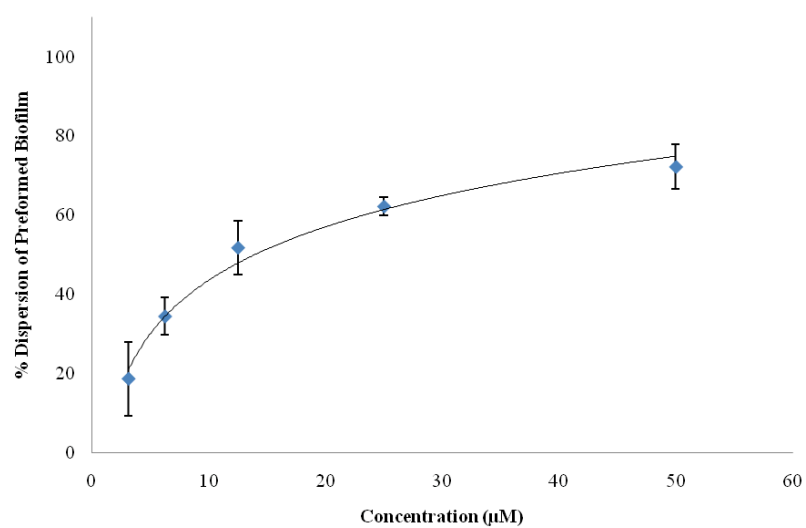

*L. anguillarum*

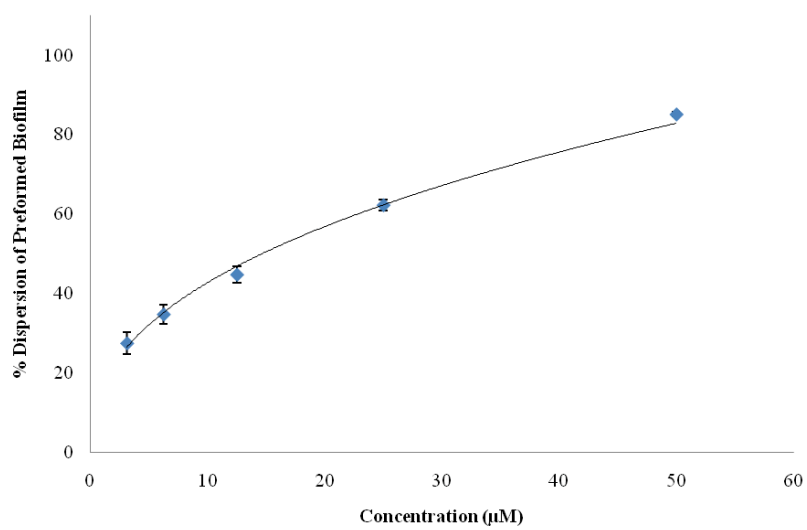

*R. salexigens*

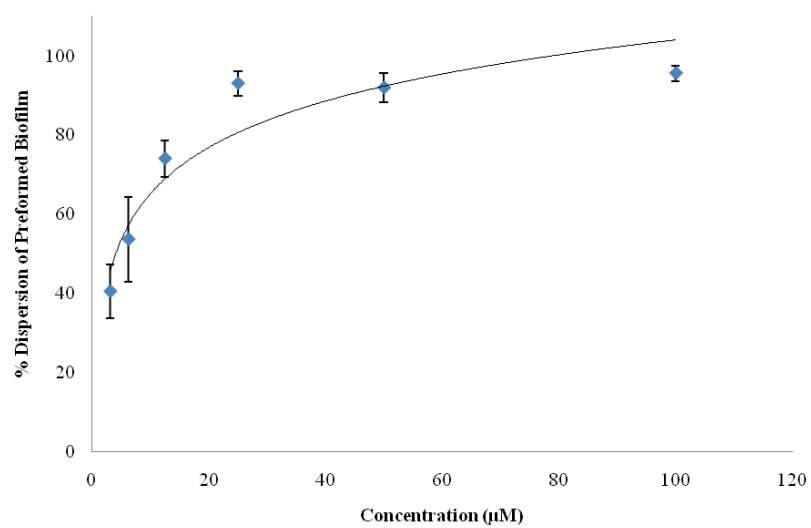

MRSA

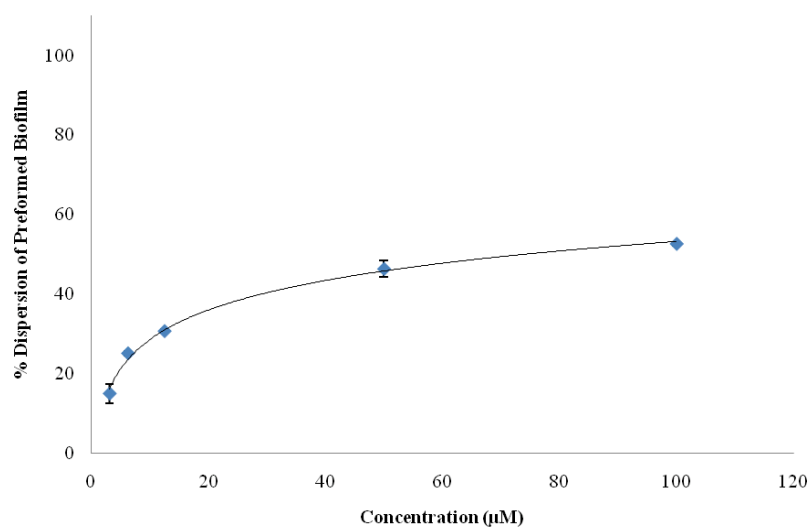



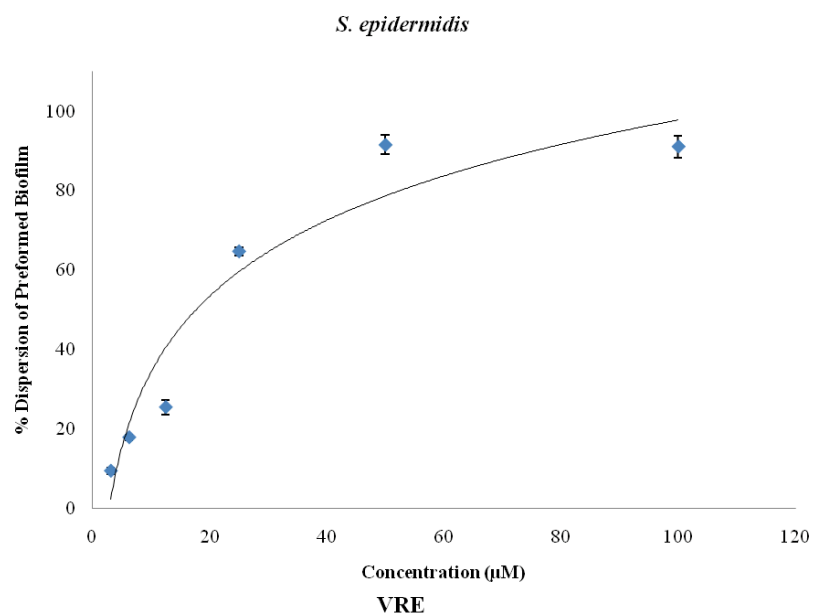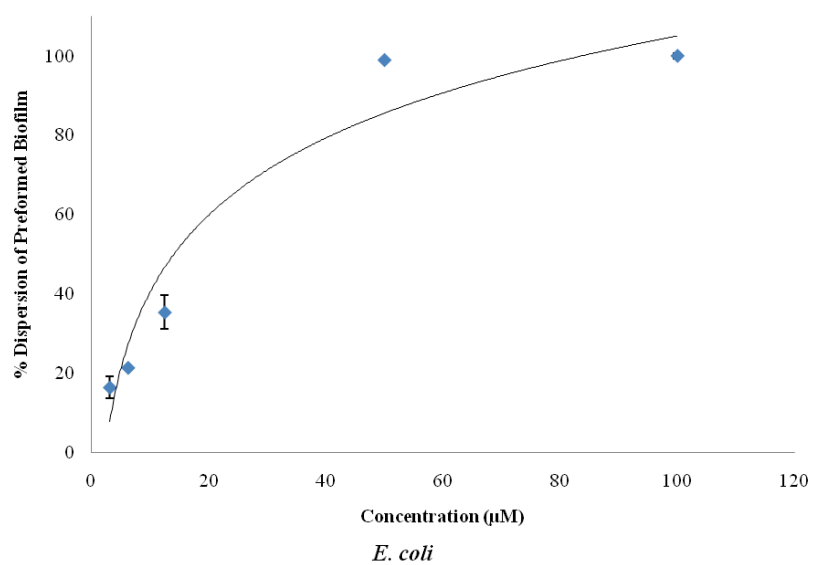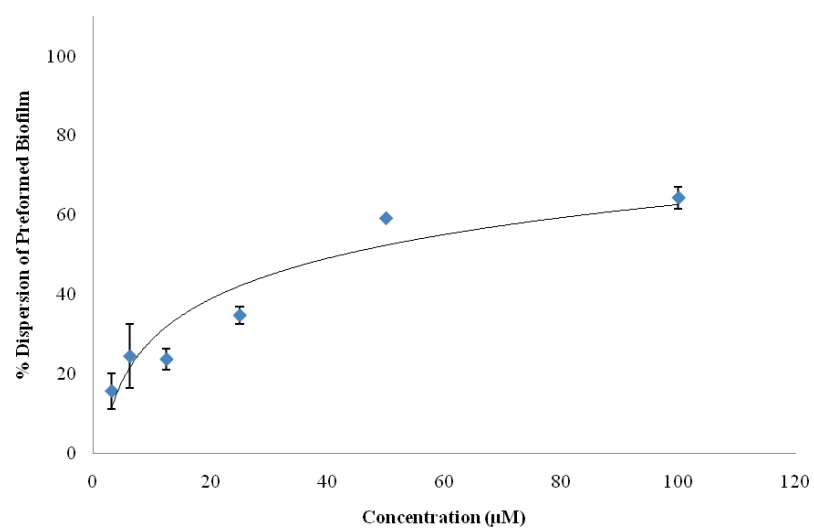

**MDRAB**

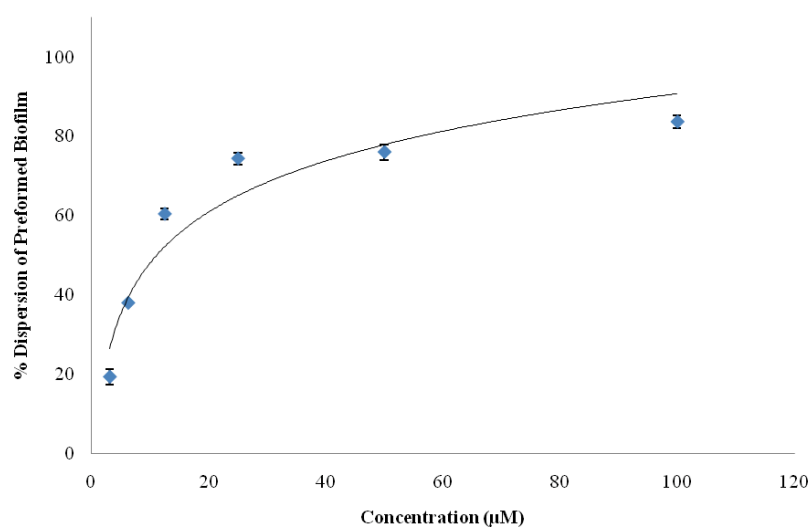

*S. aureus* (ATCC: 29213)

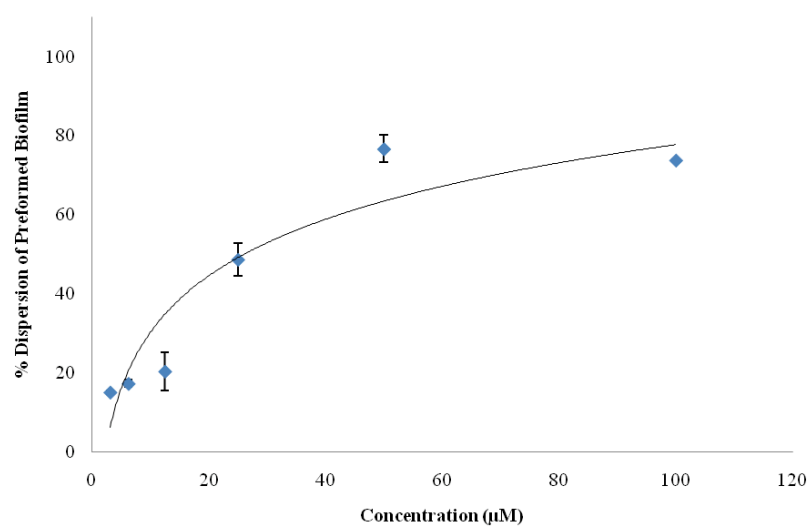

# Hemolysis Graphs:

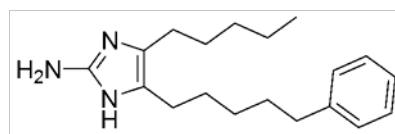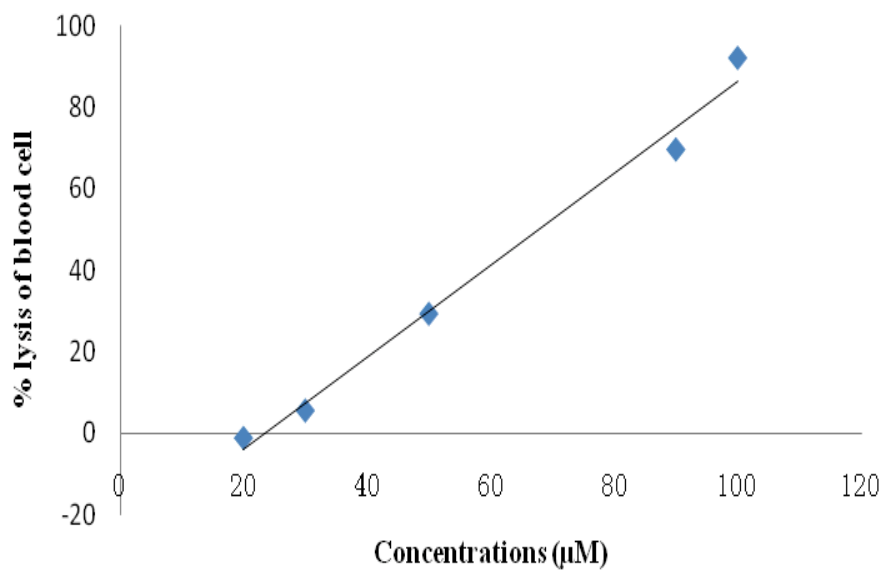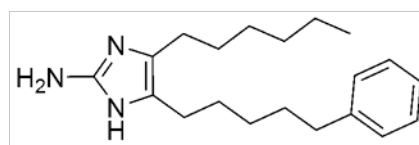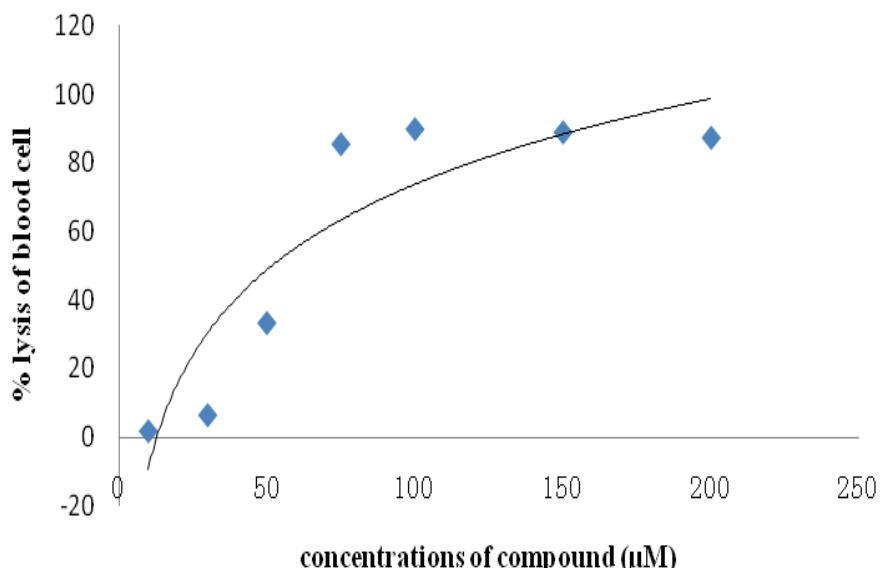

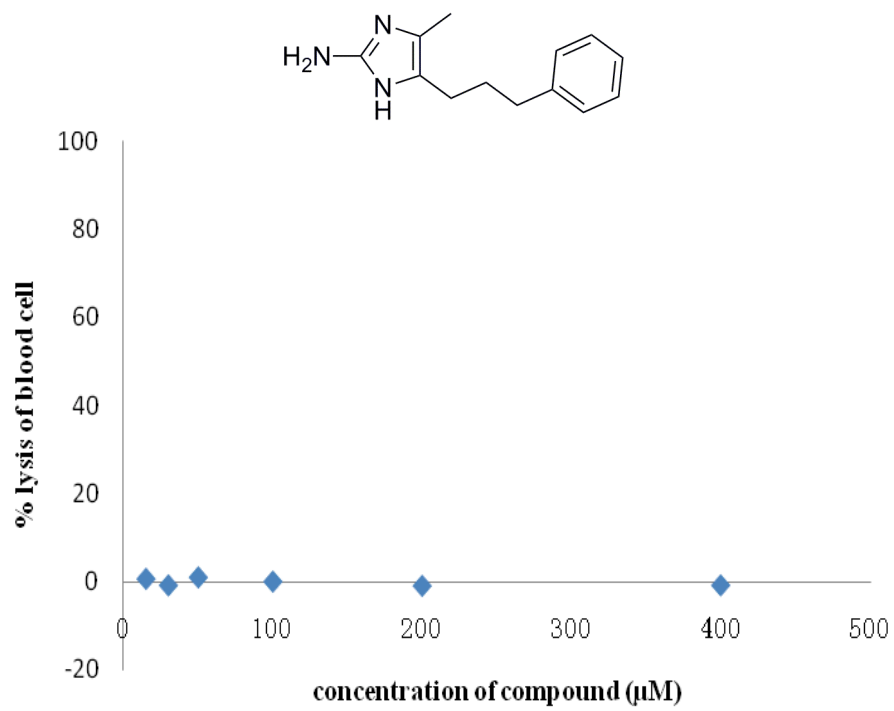

# NMR data for 4,5-disubstituted-2-aminoimidazole

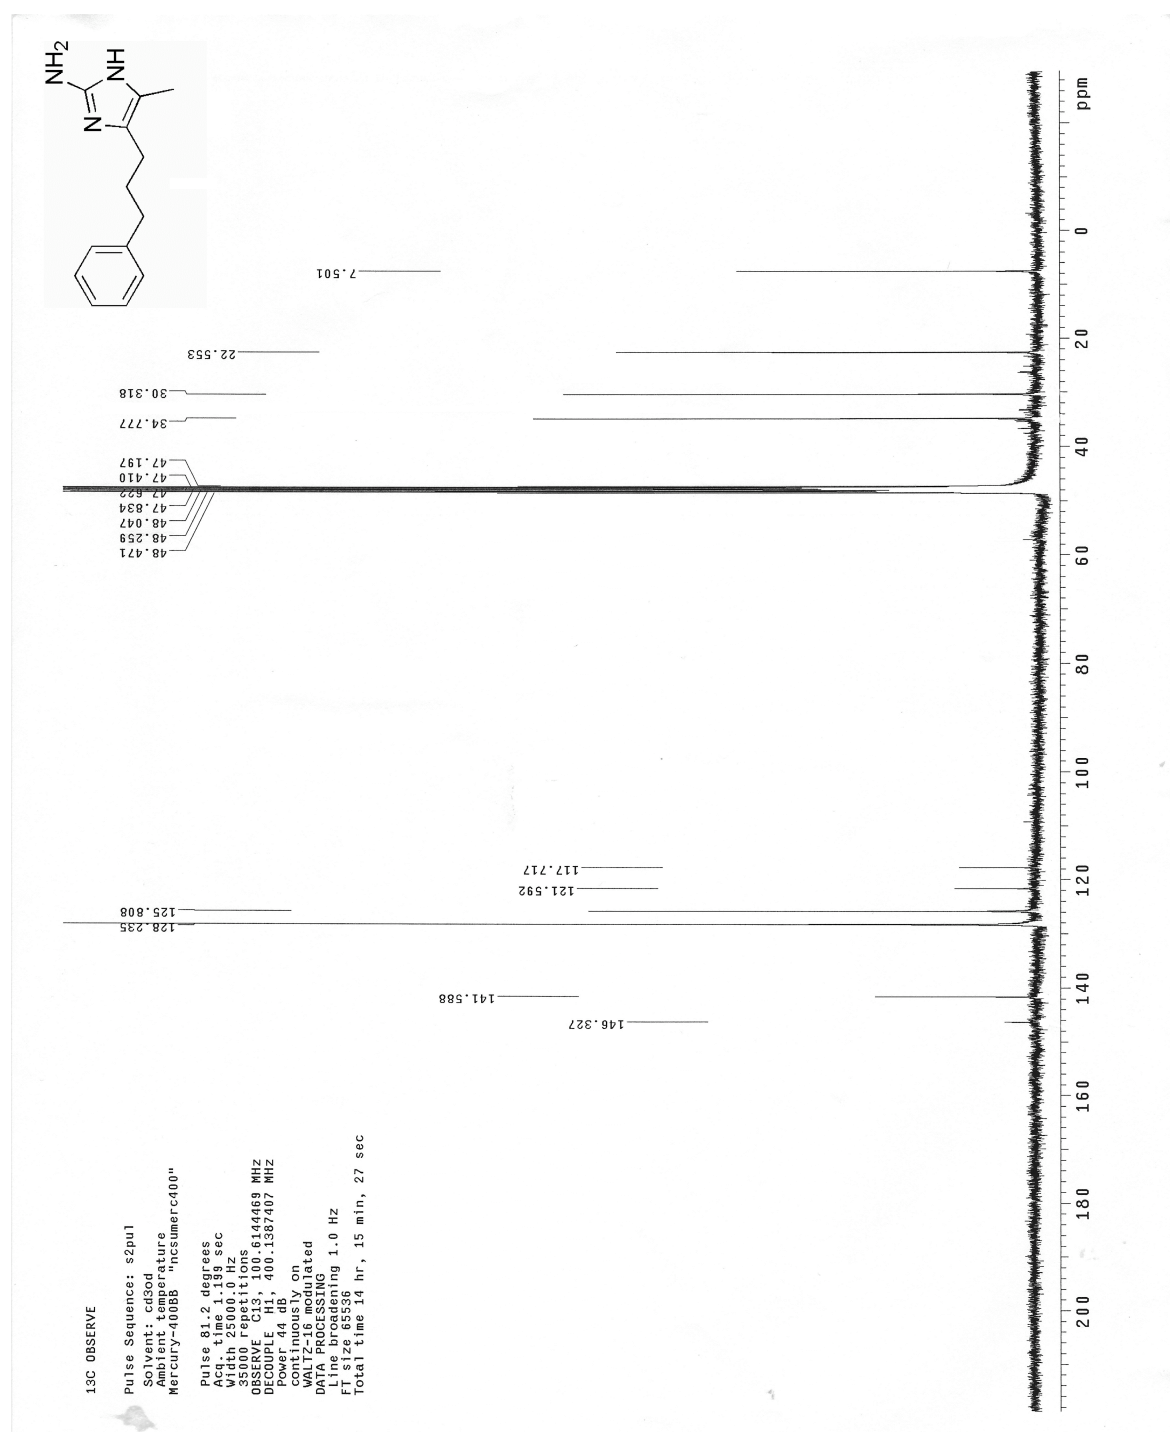

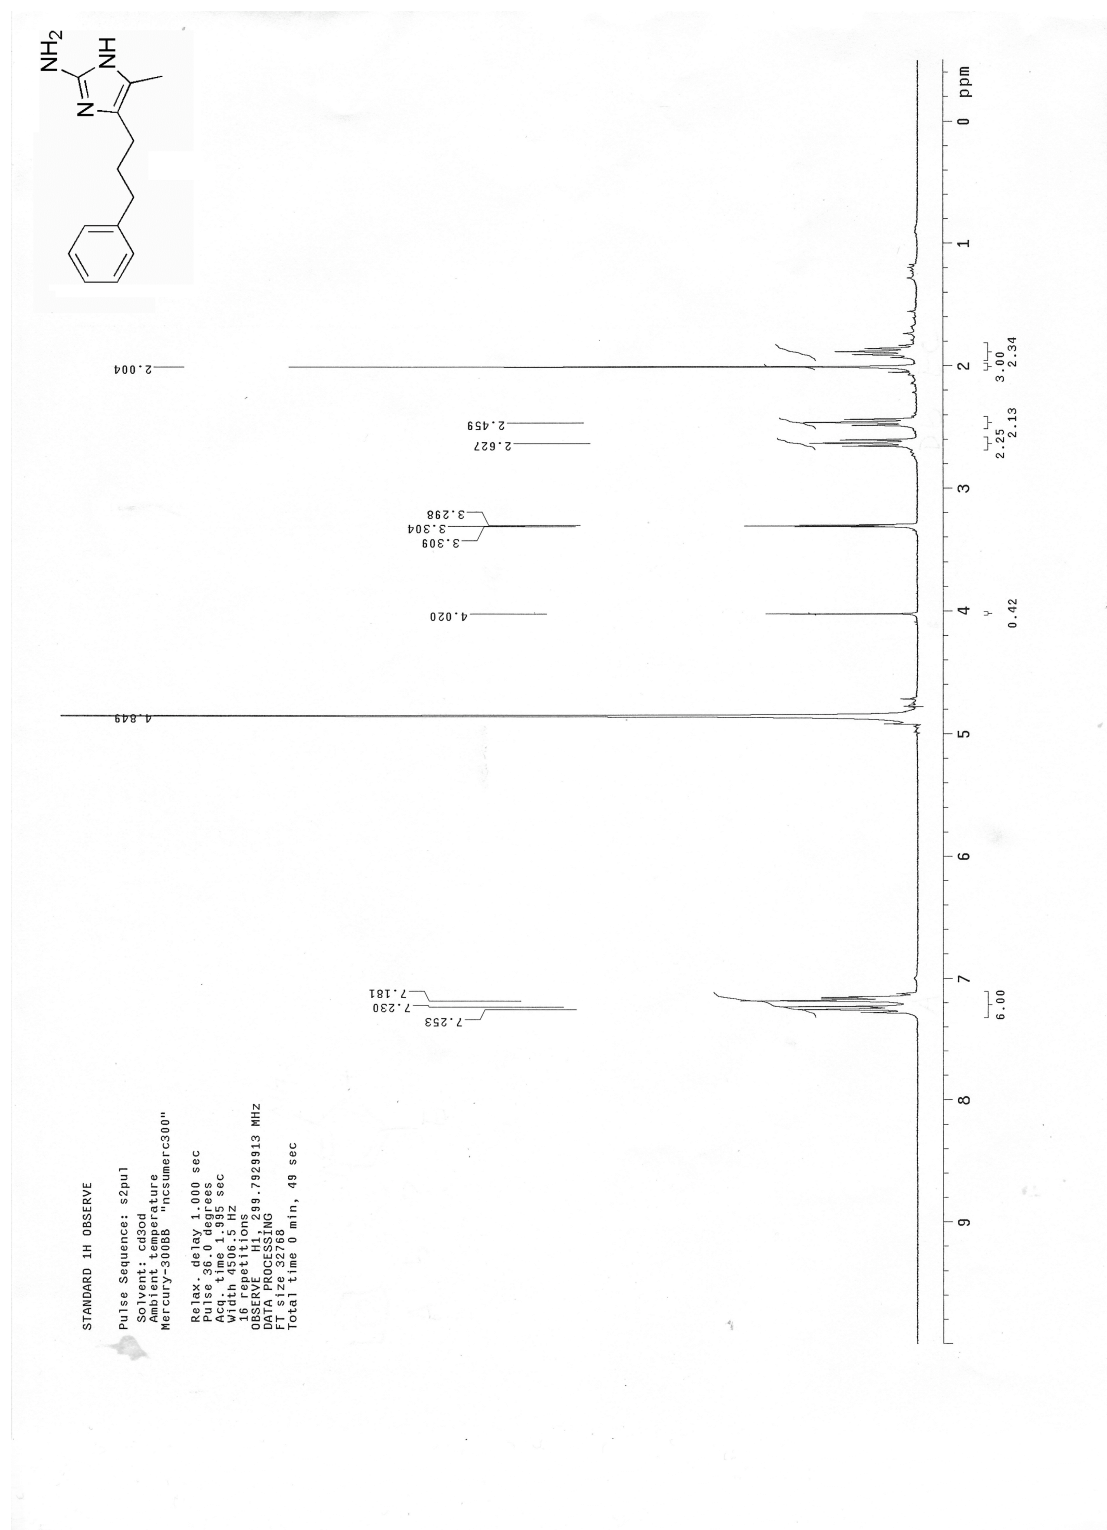

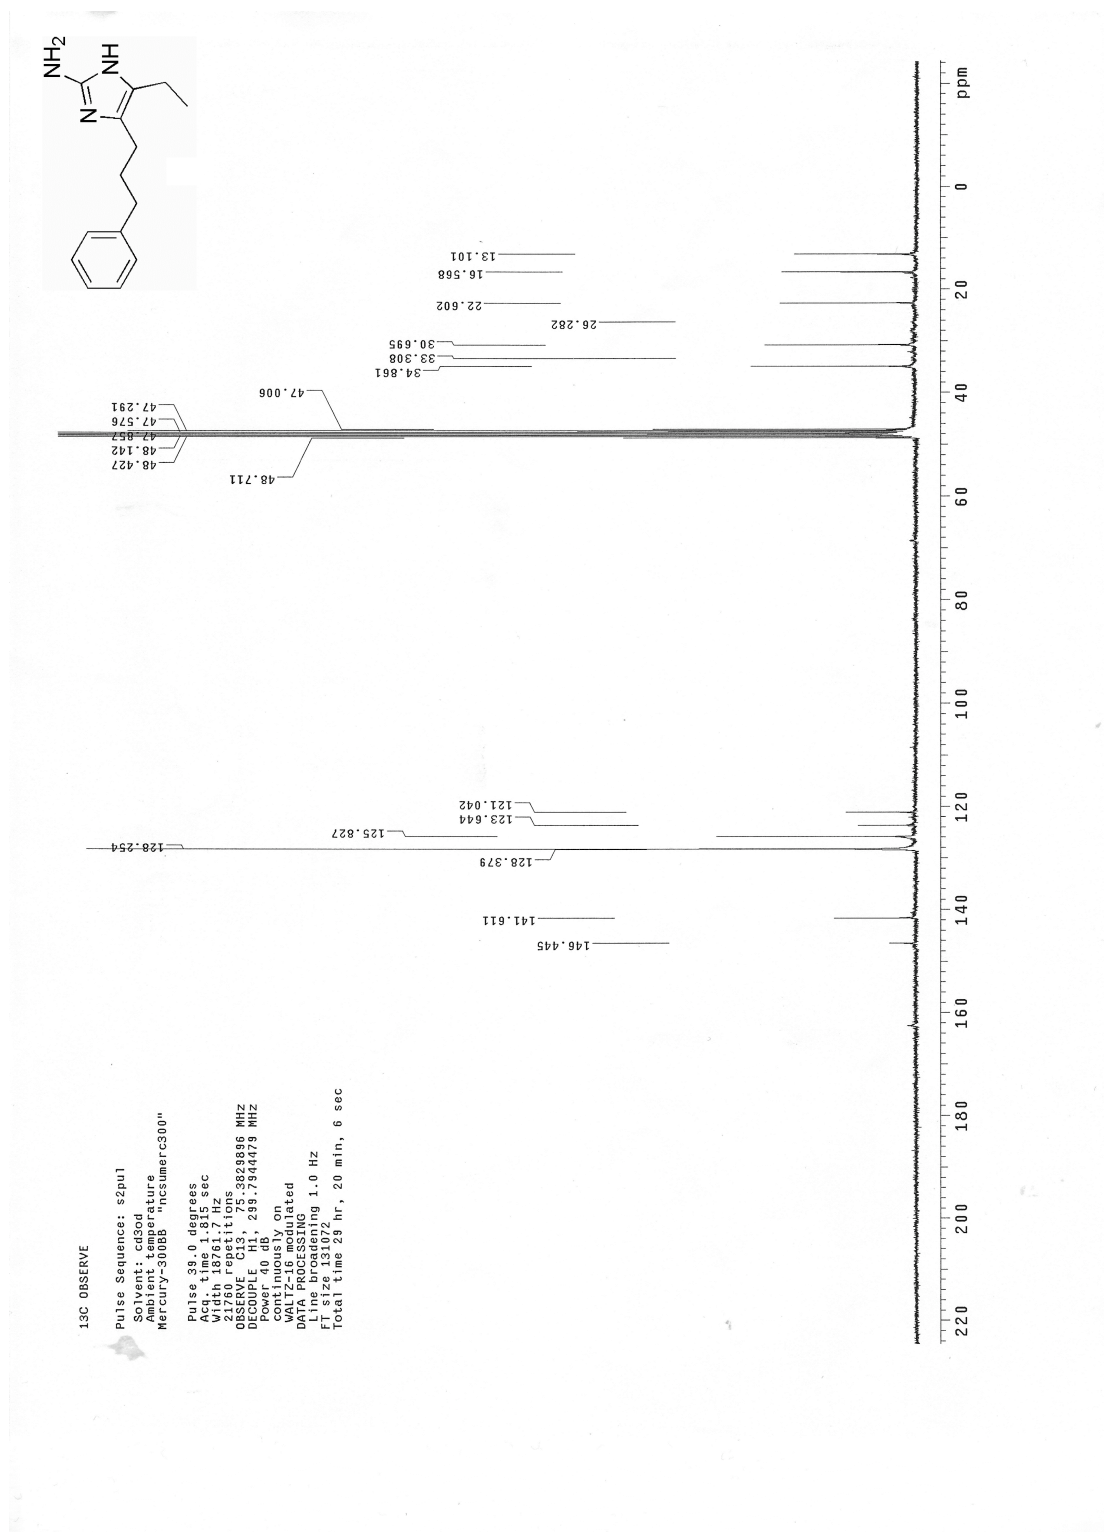

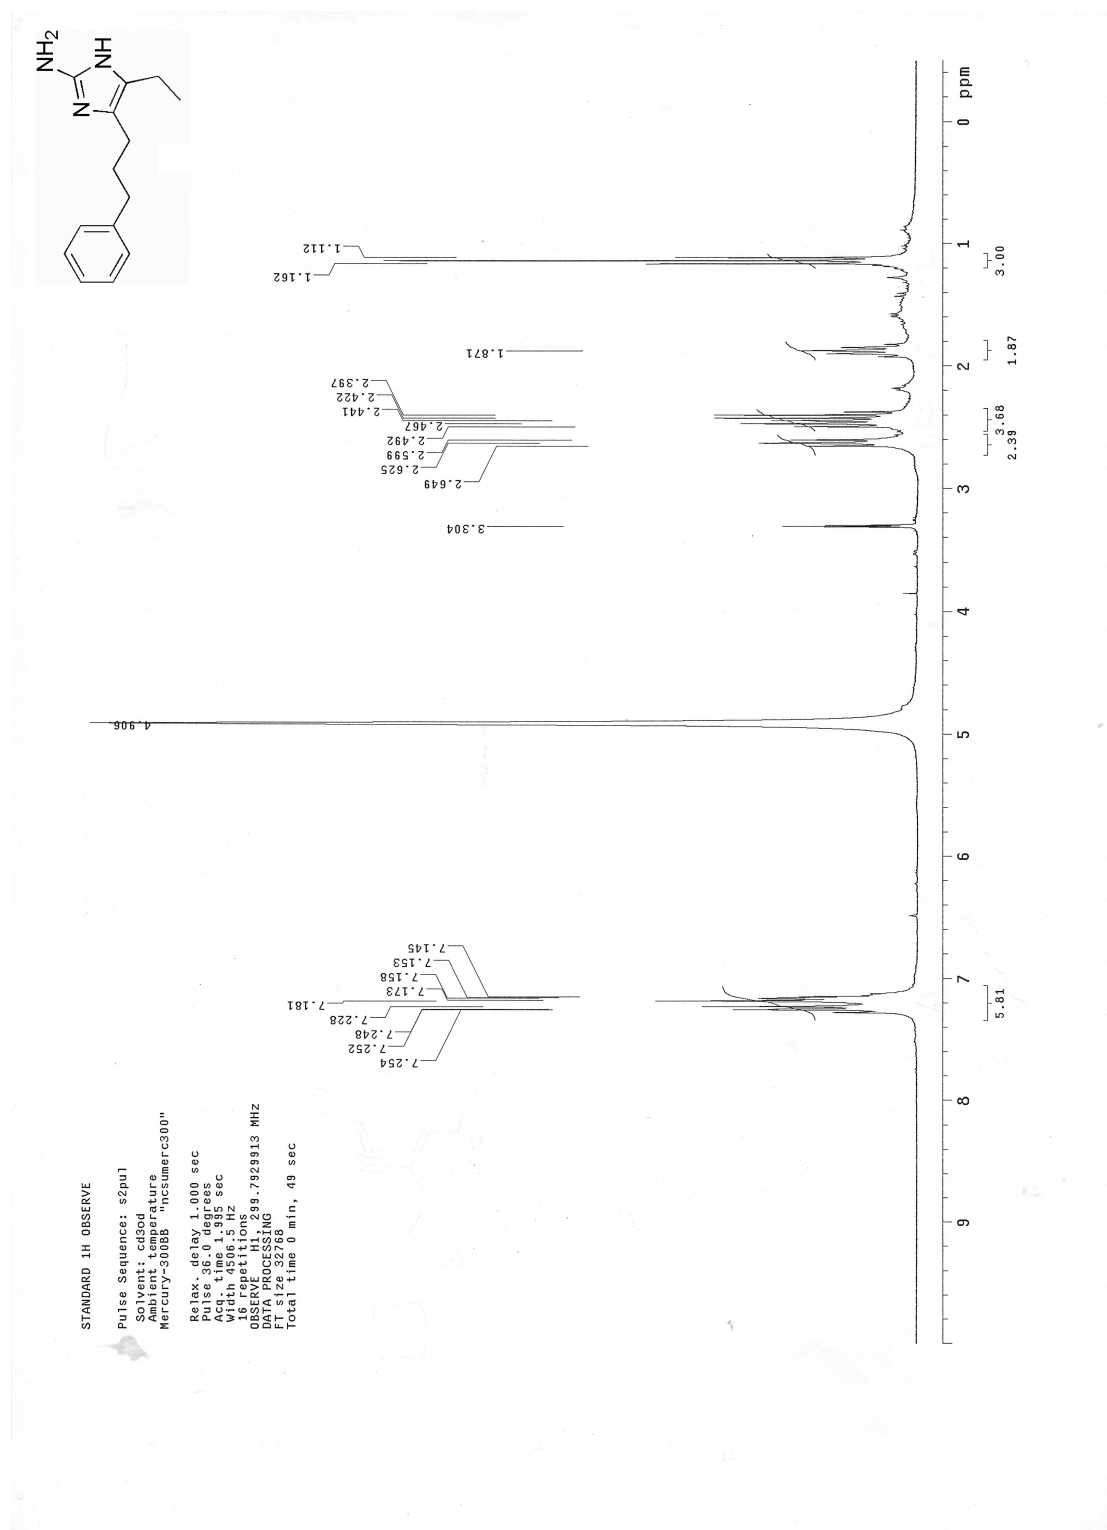



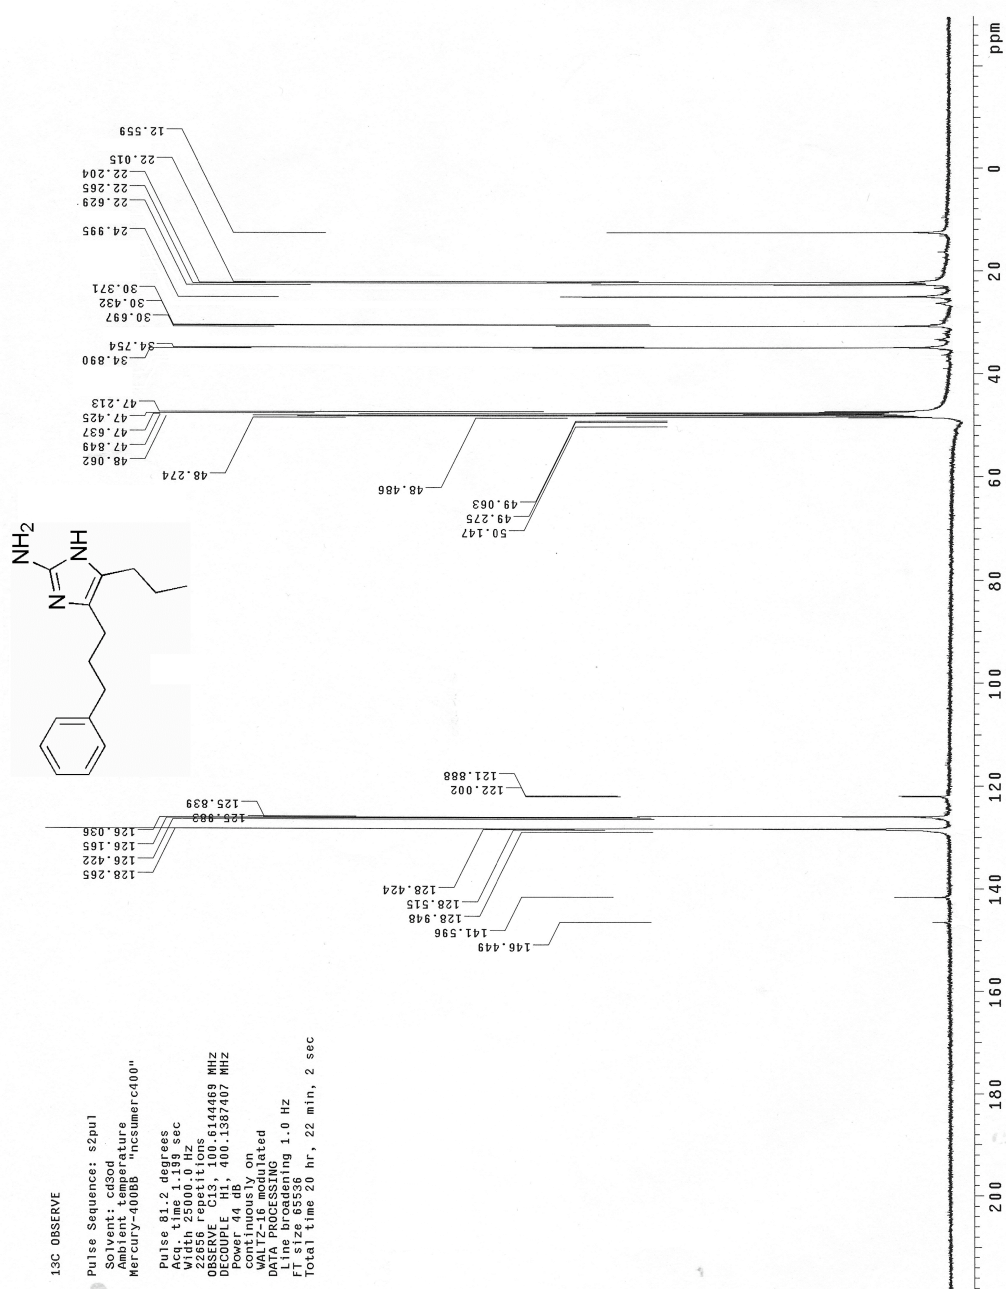

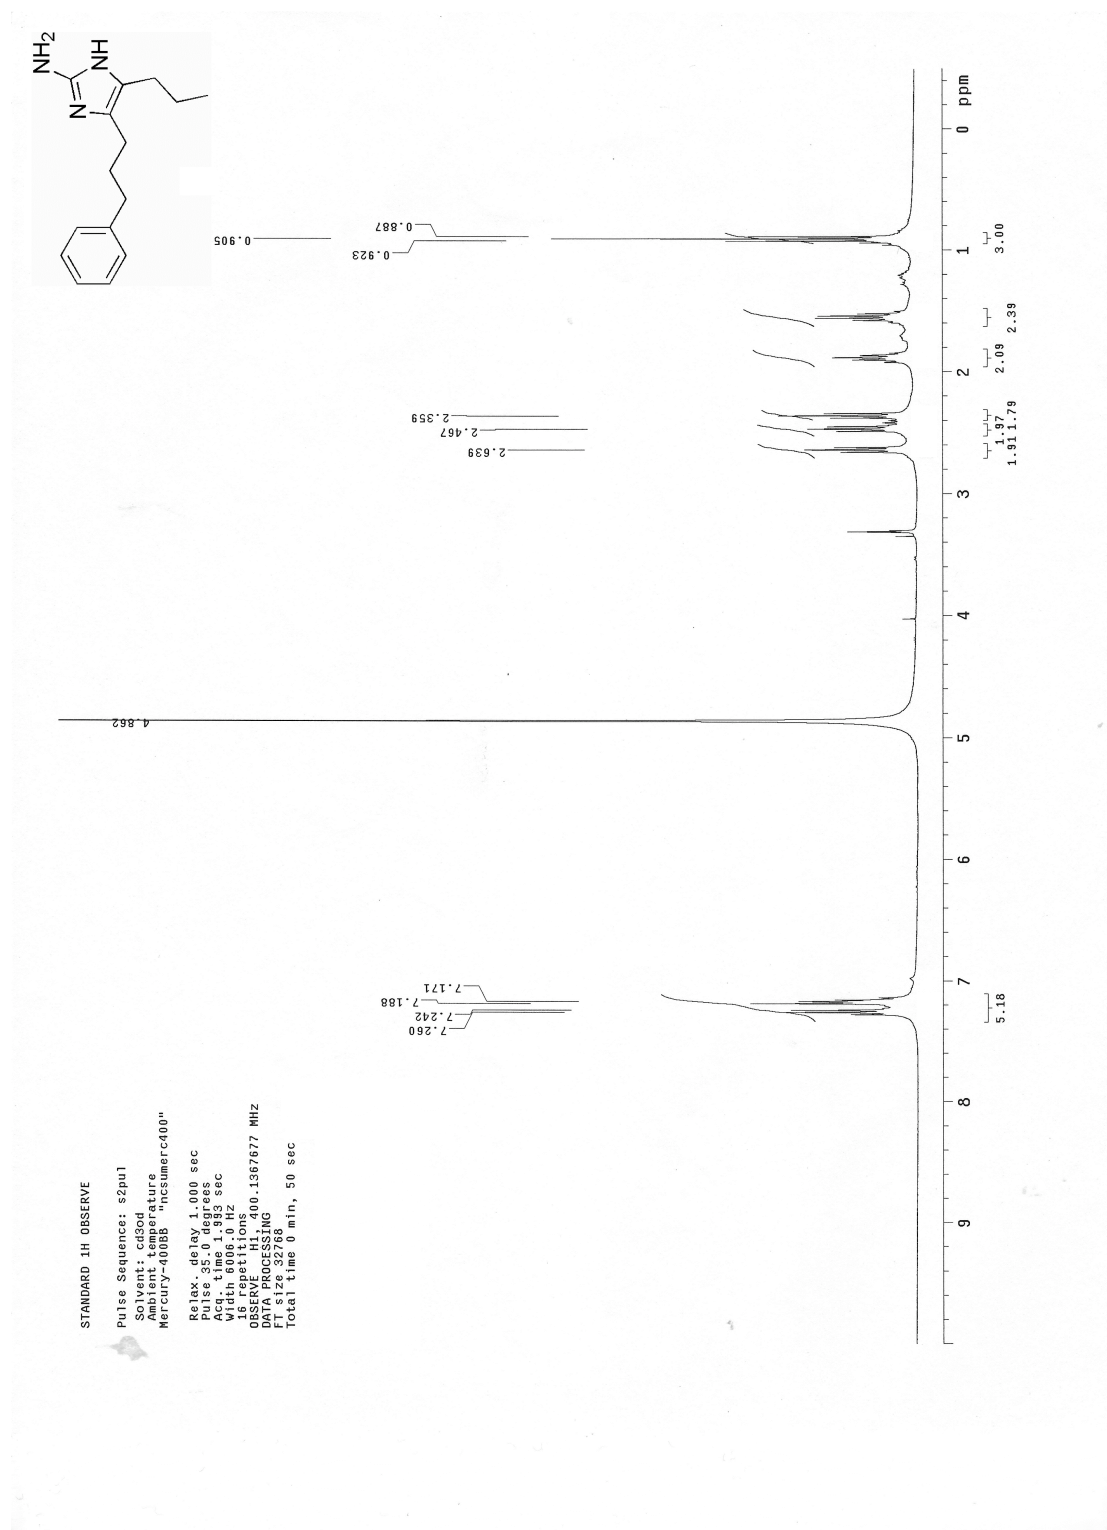

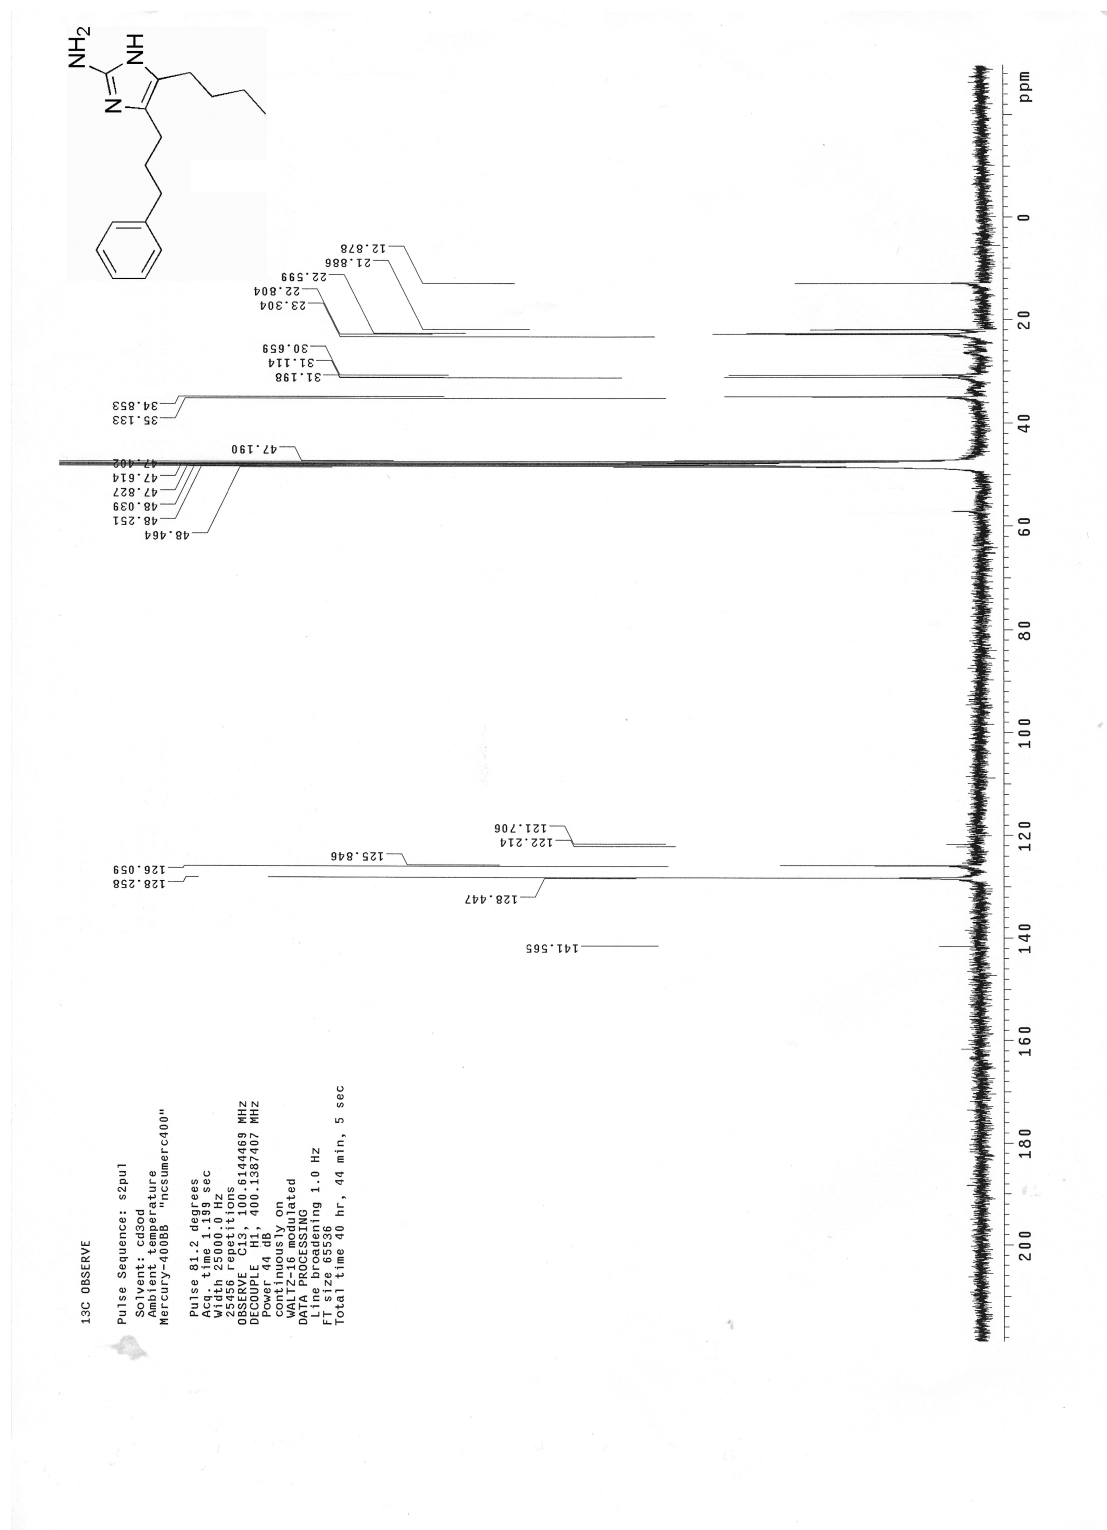

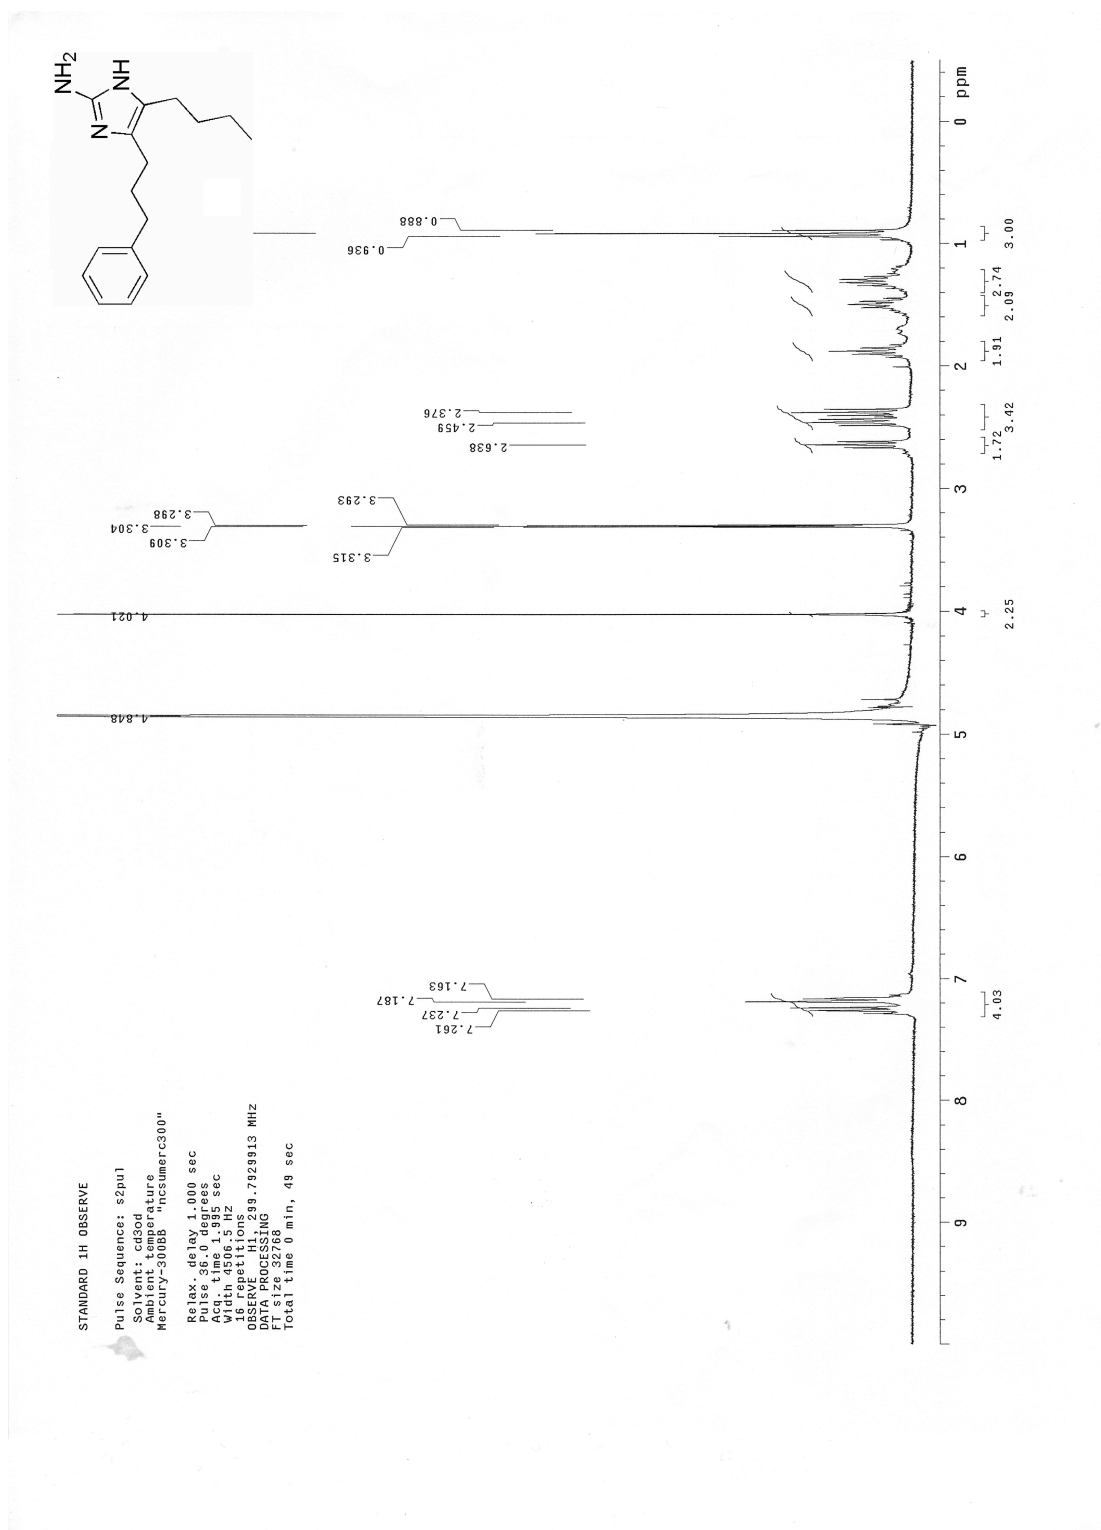

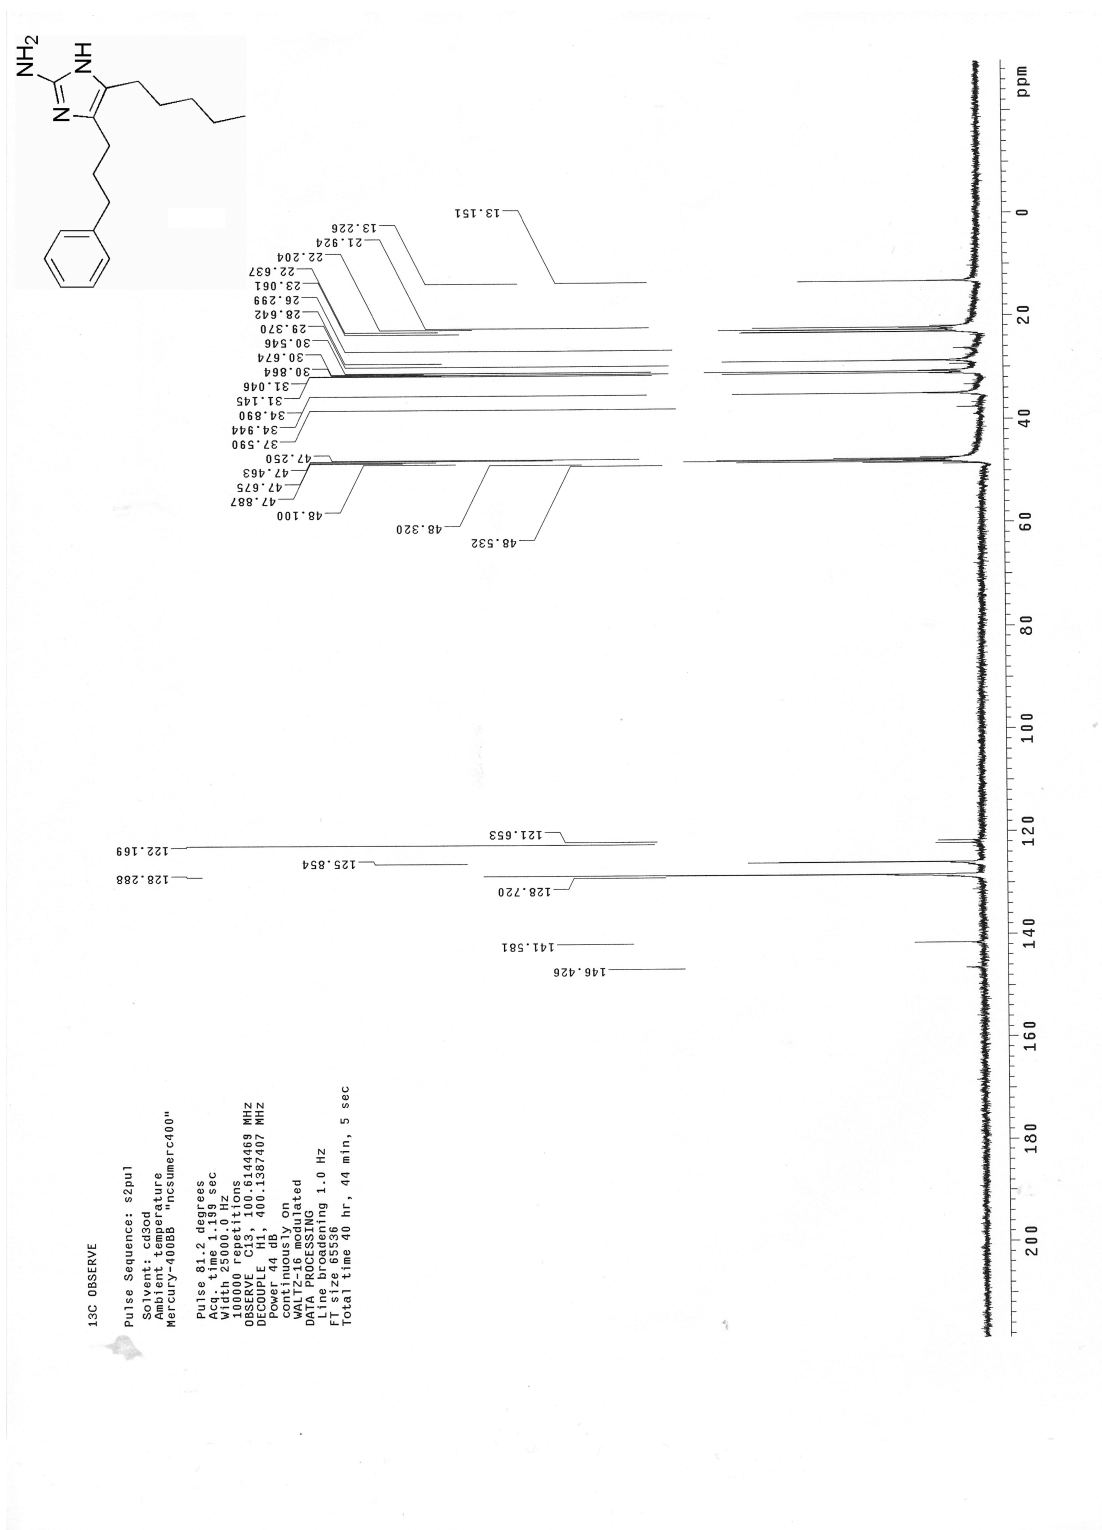



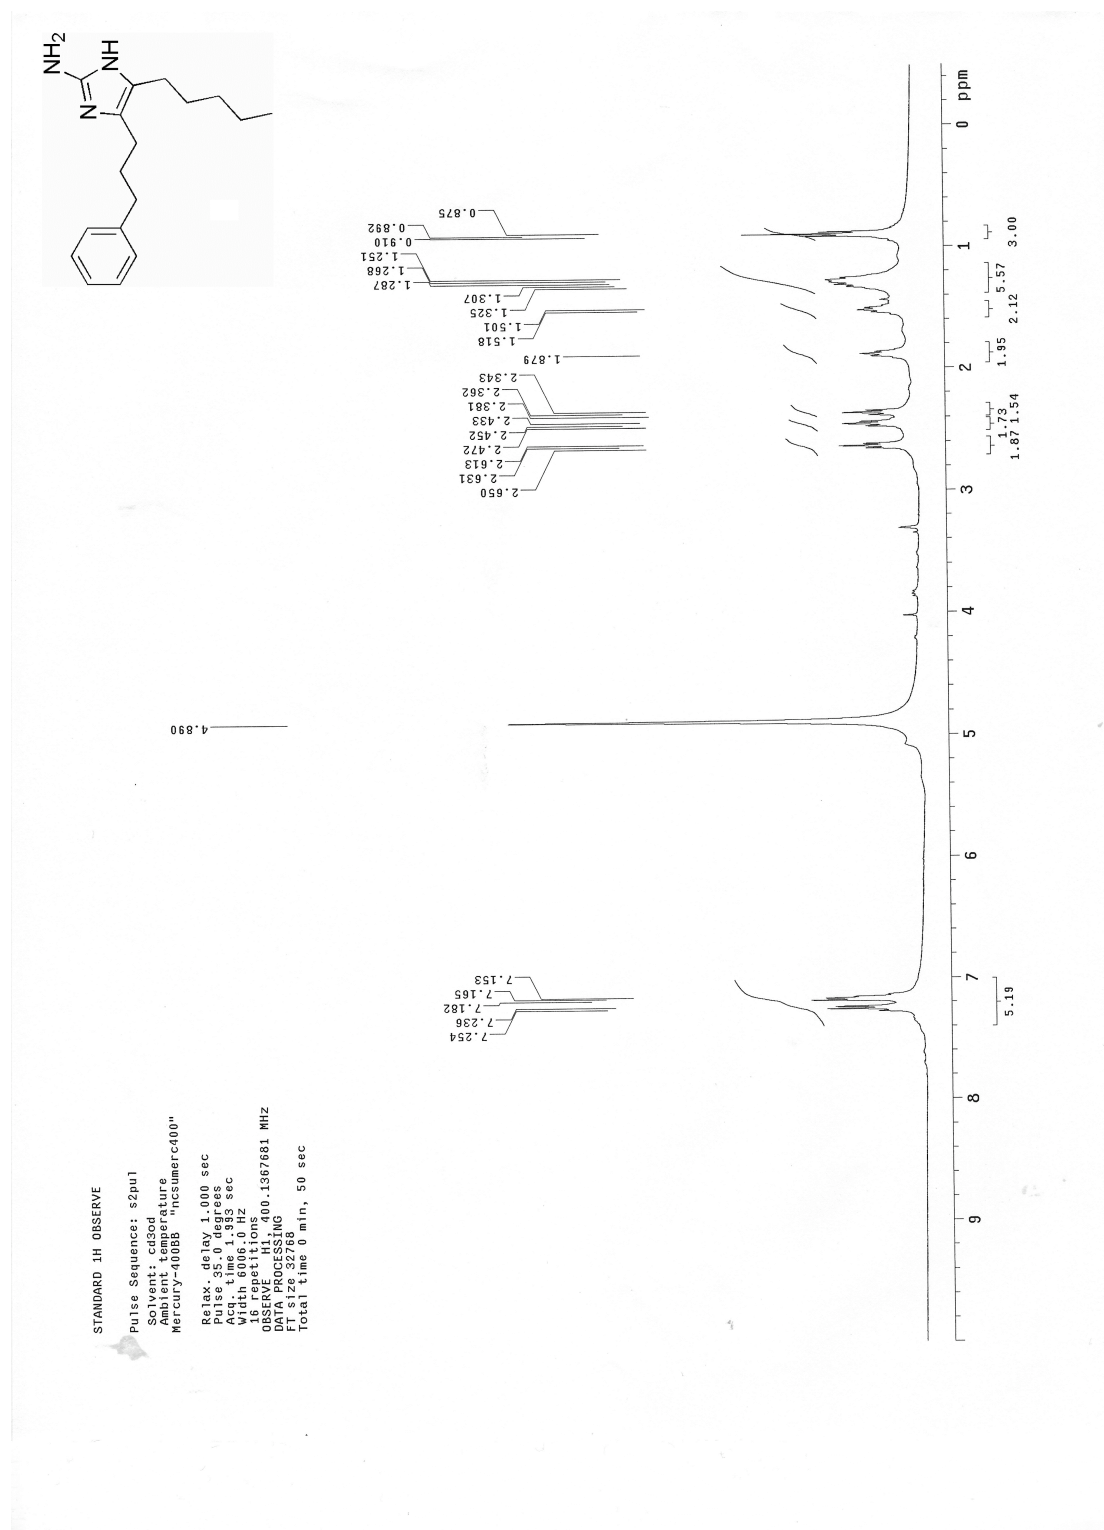

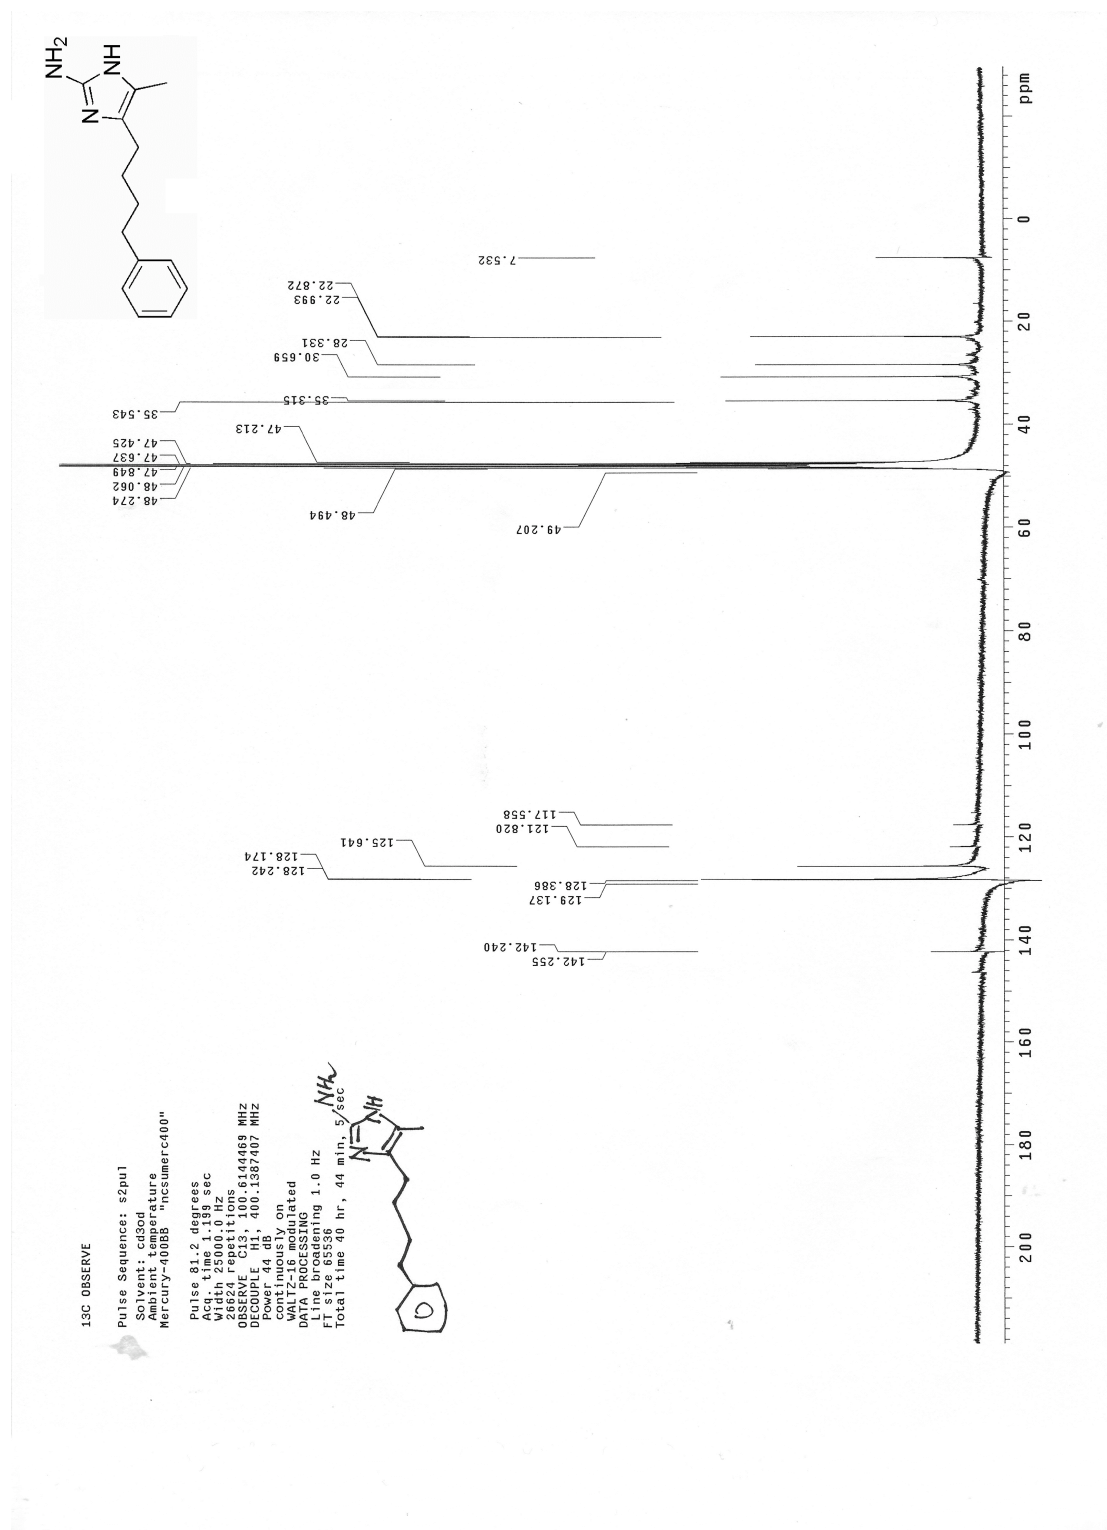

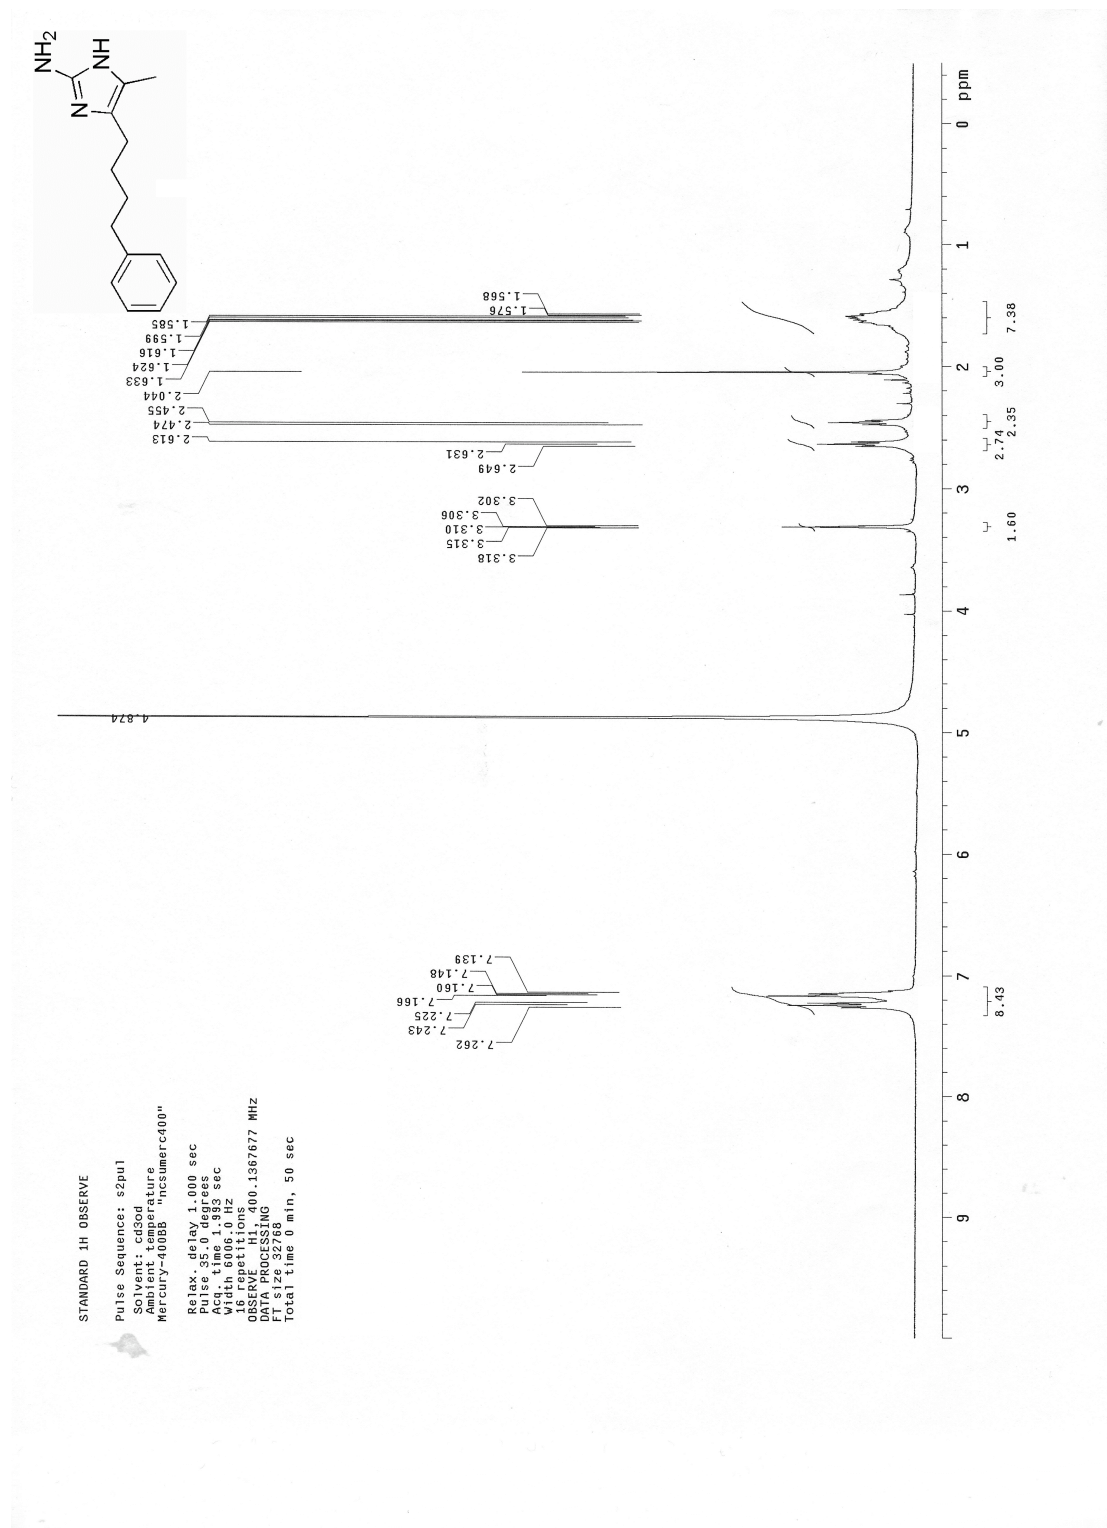



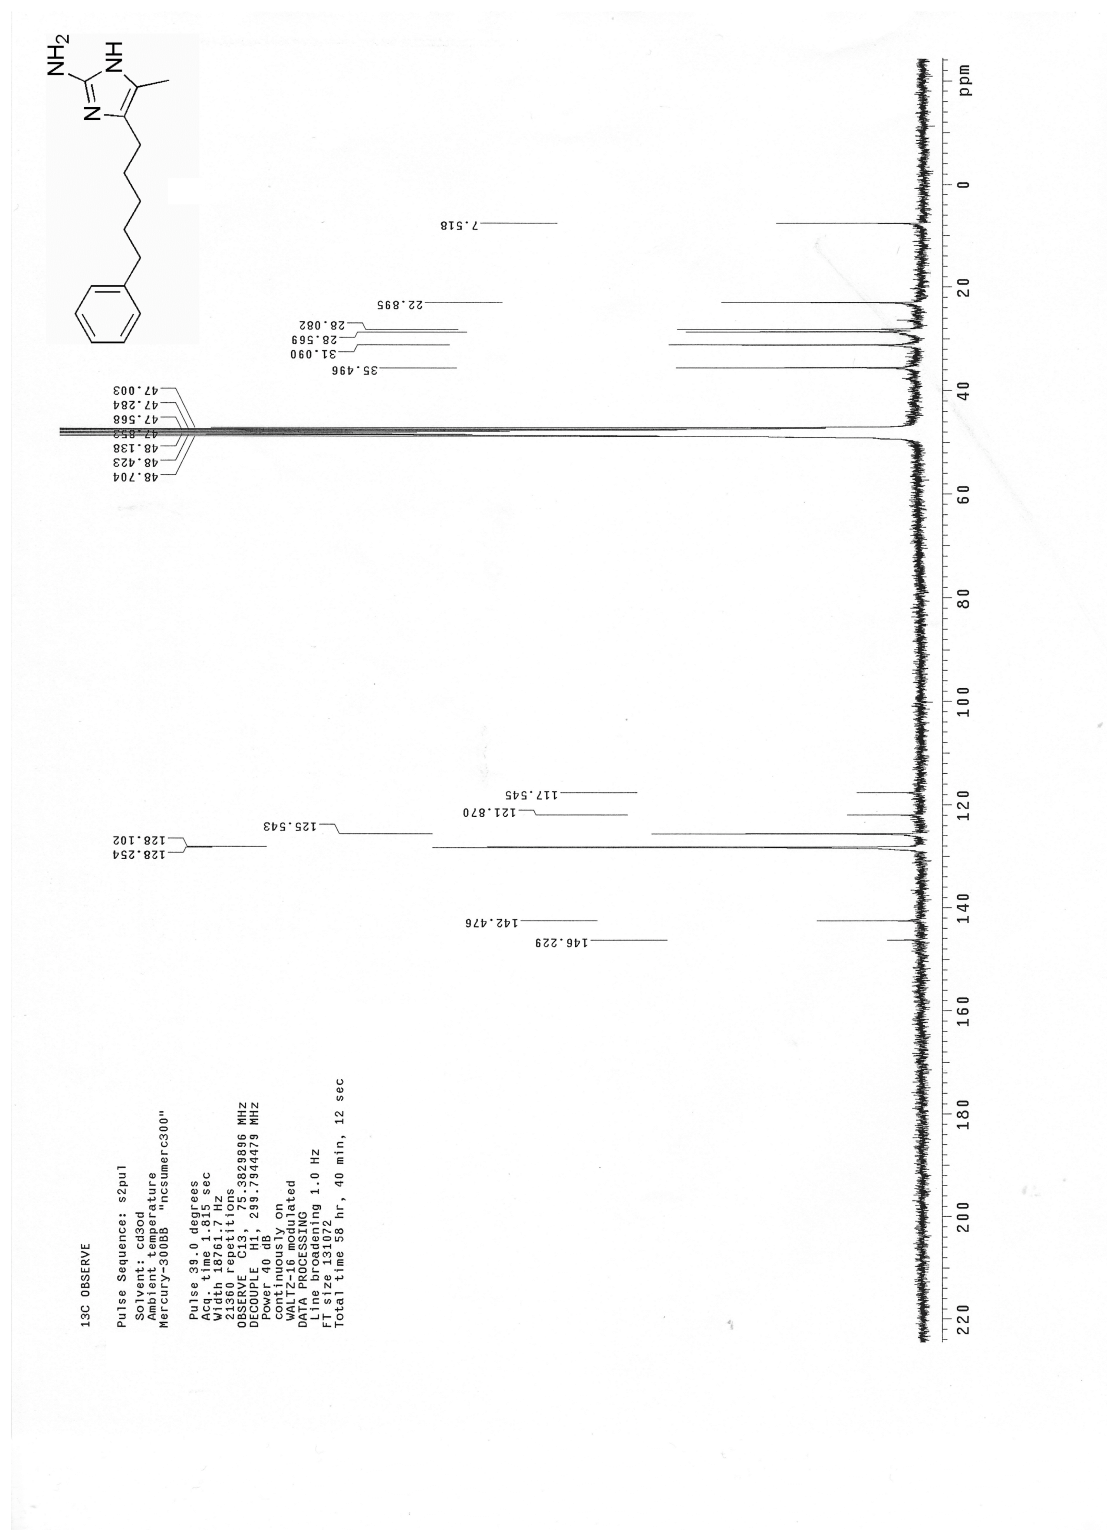

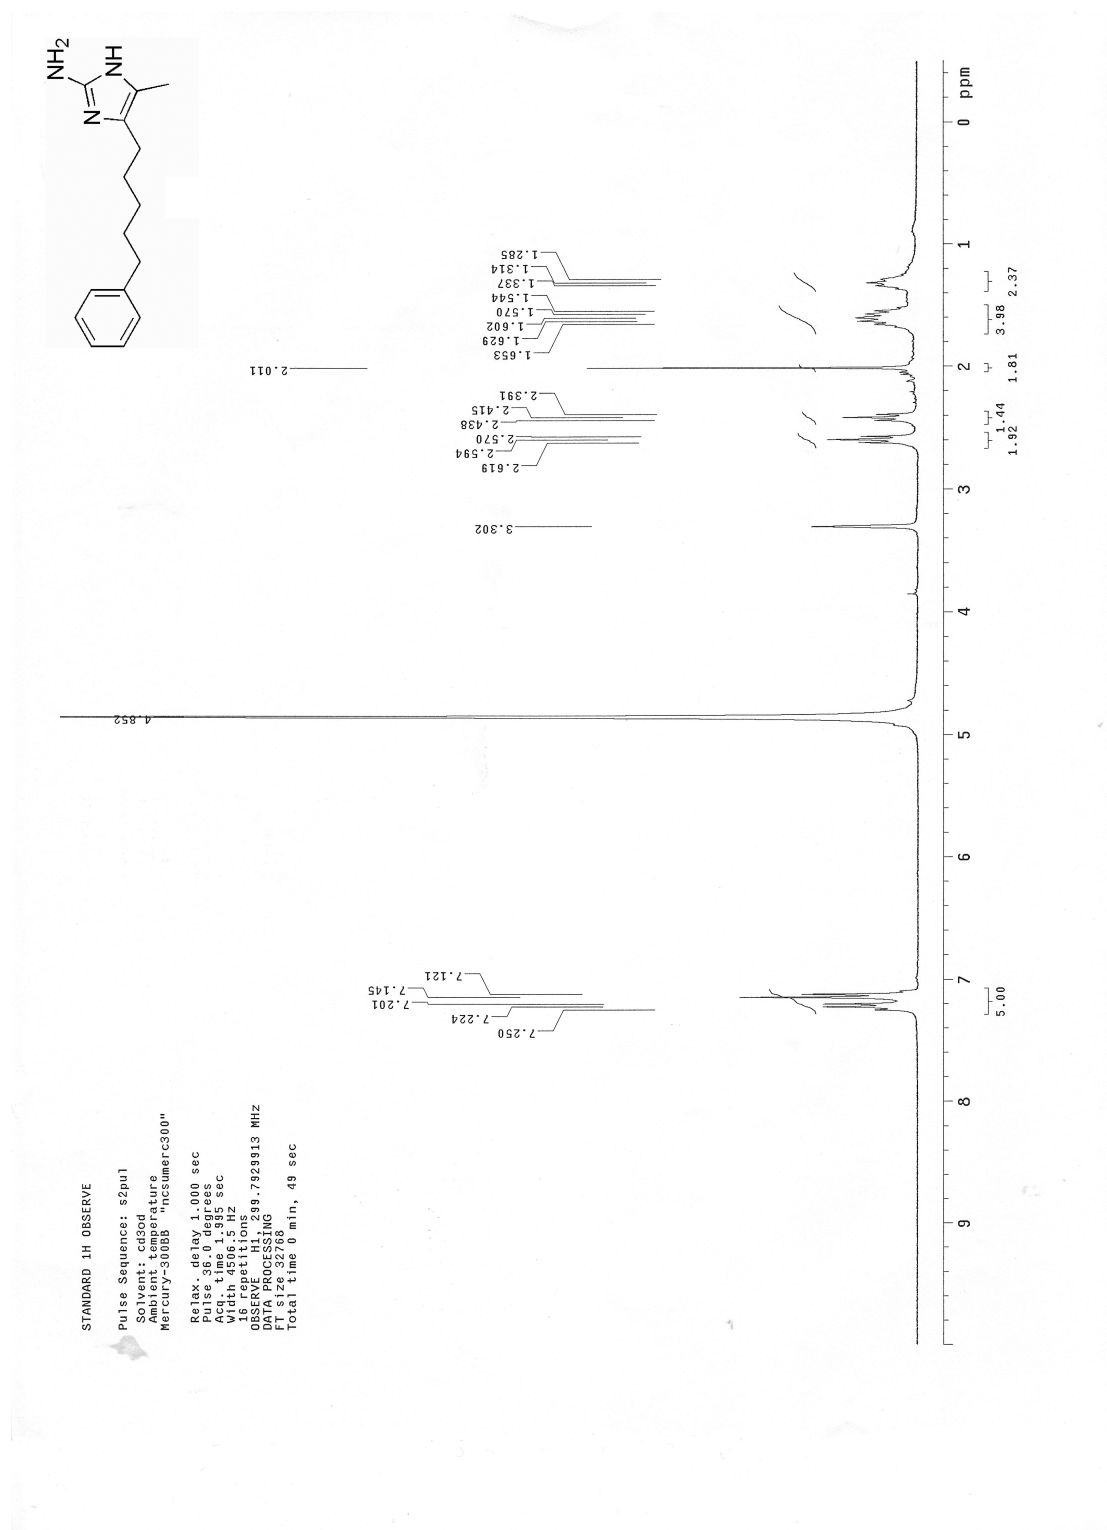

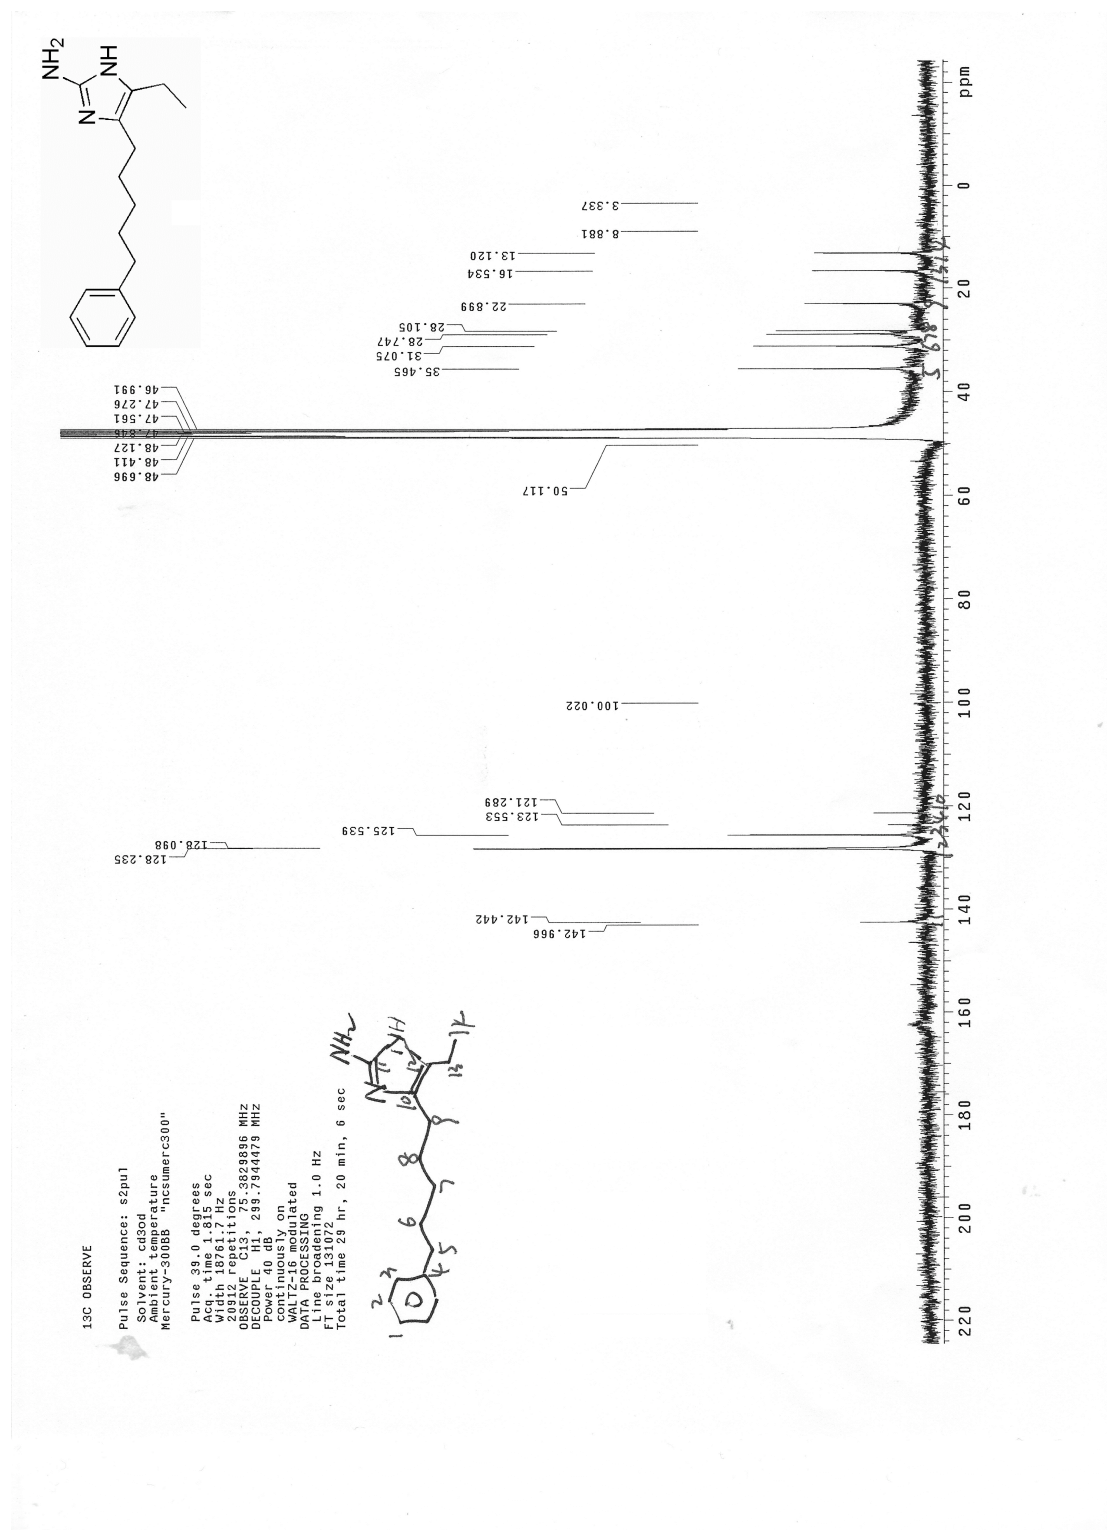

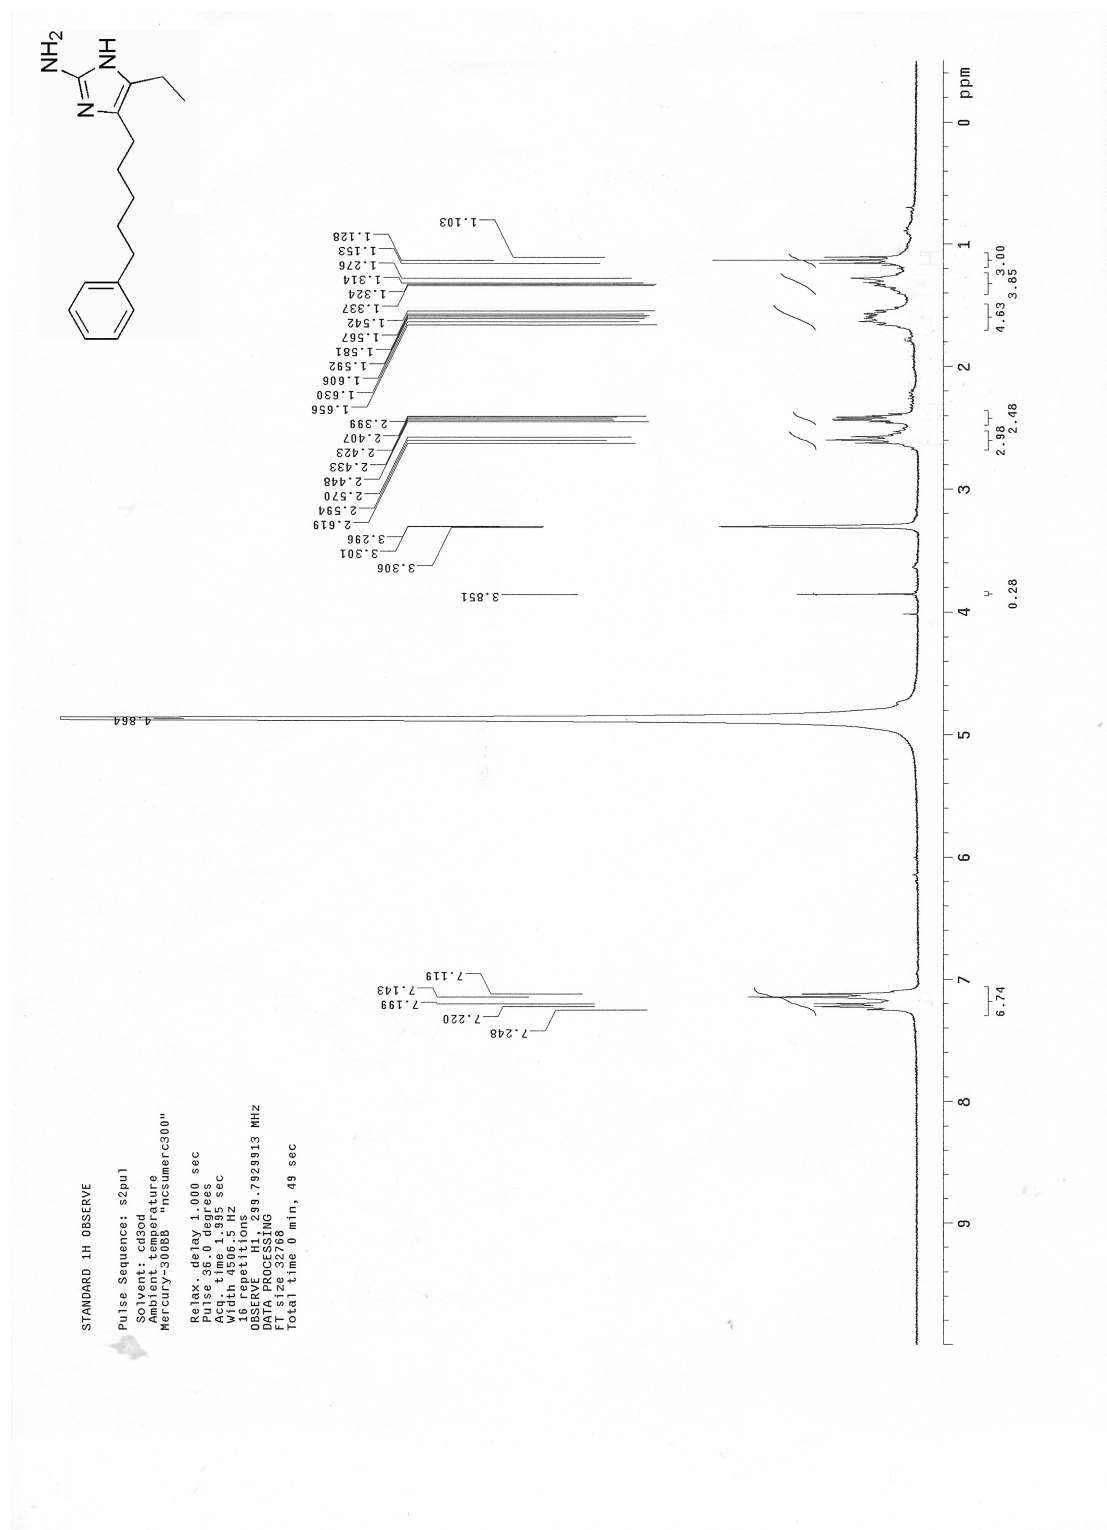



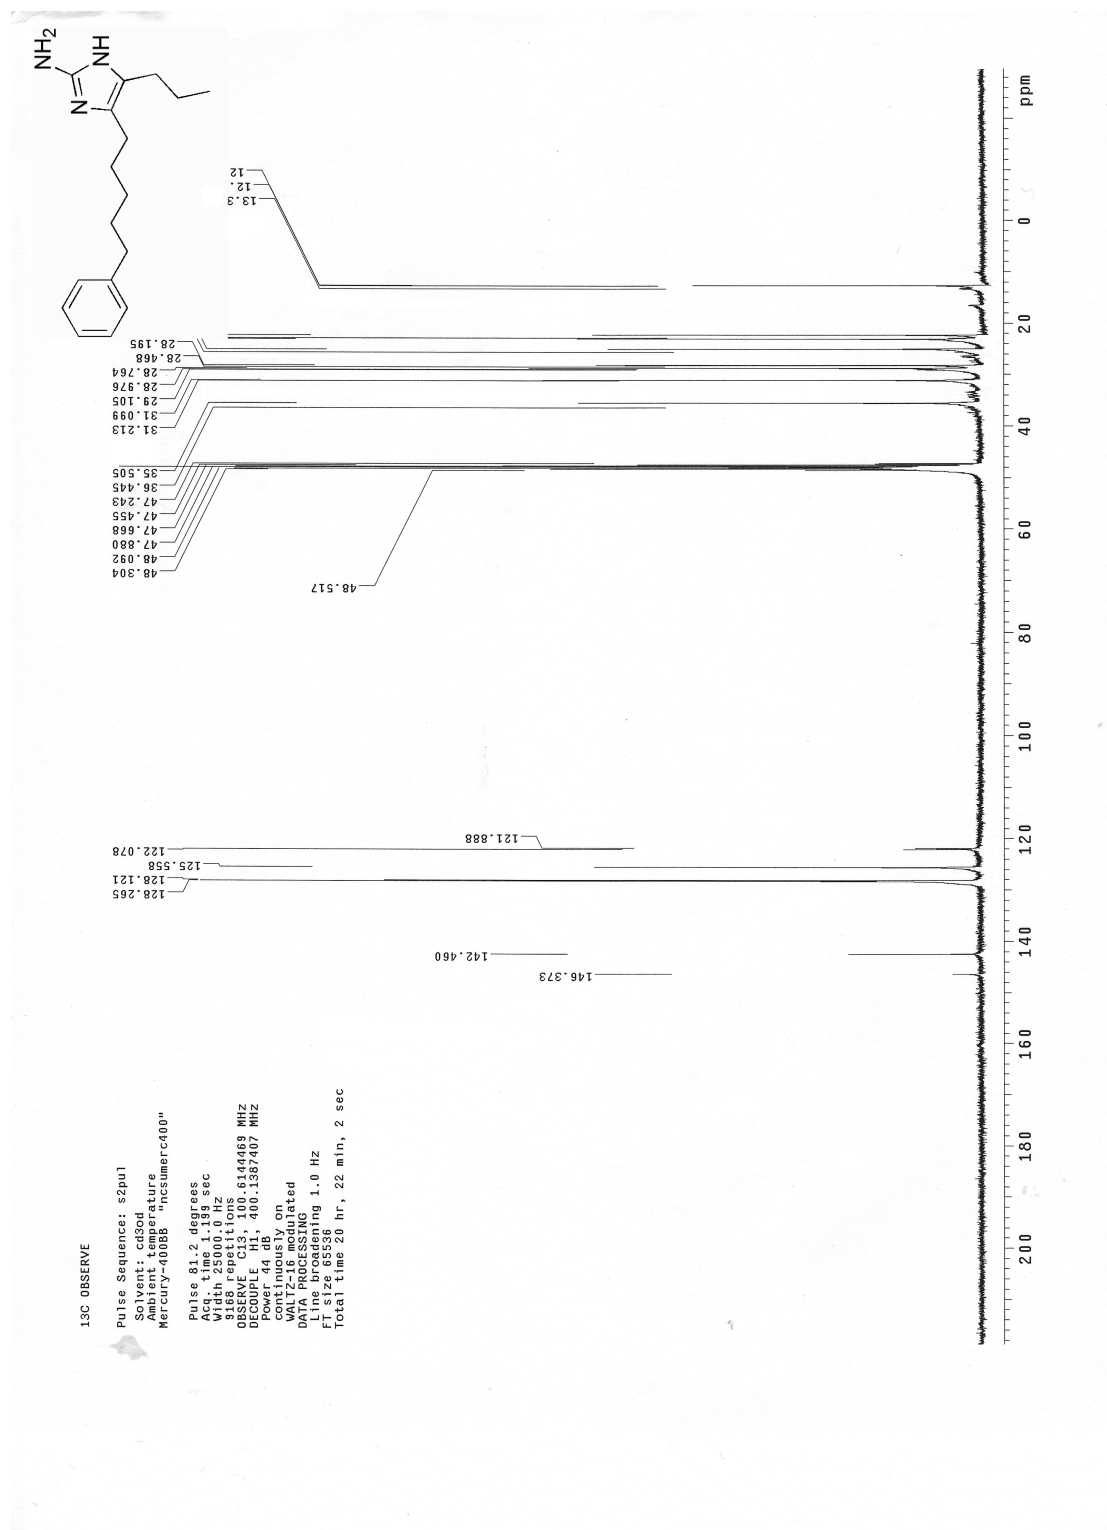

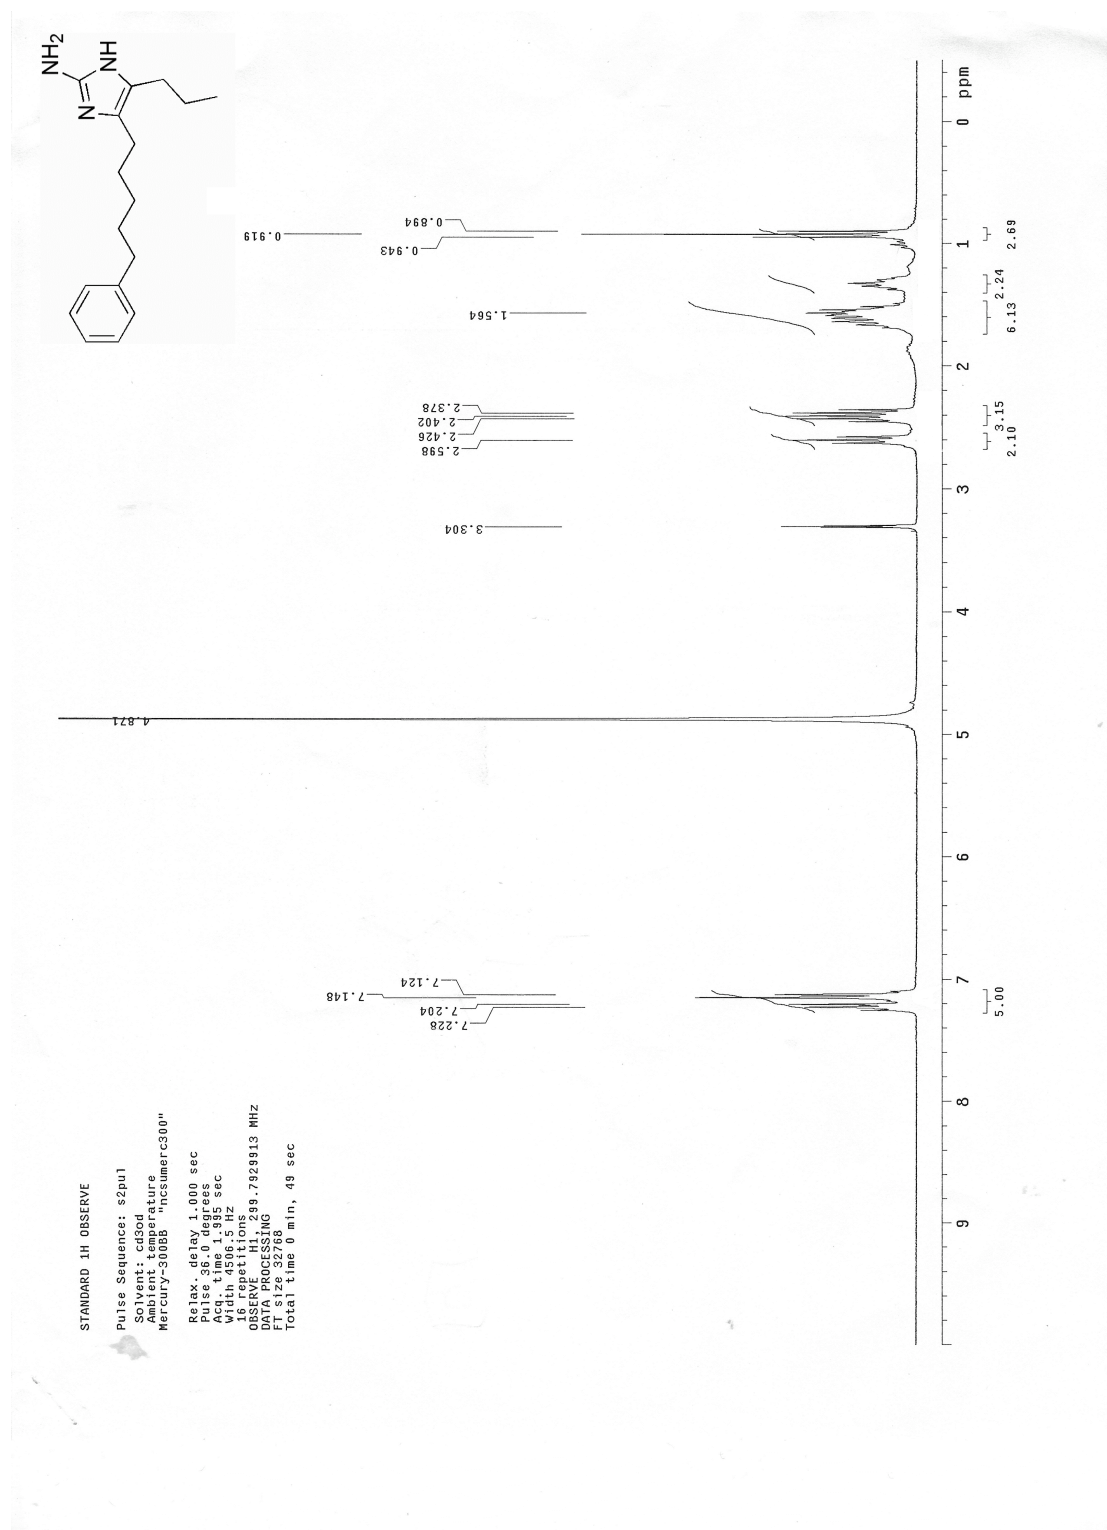

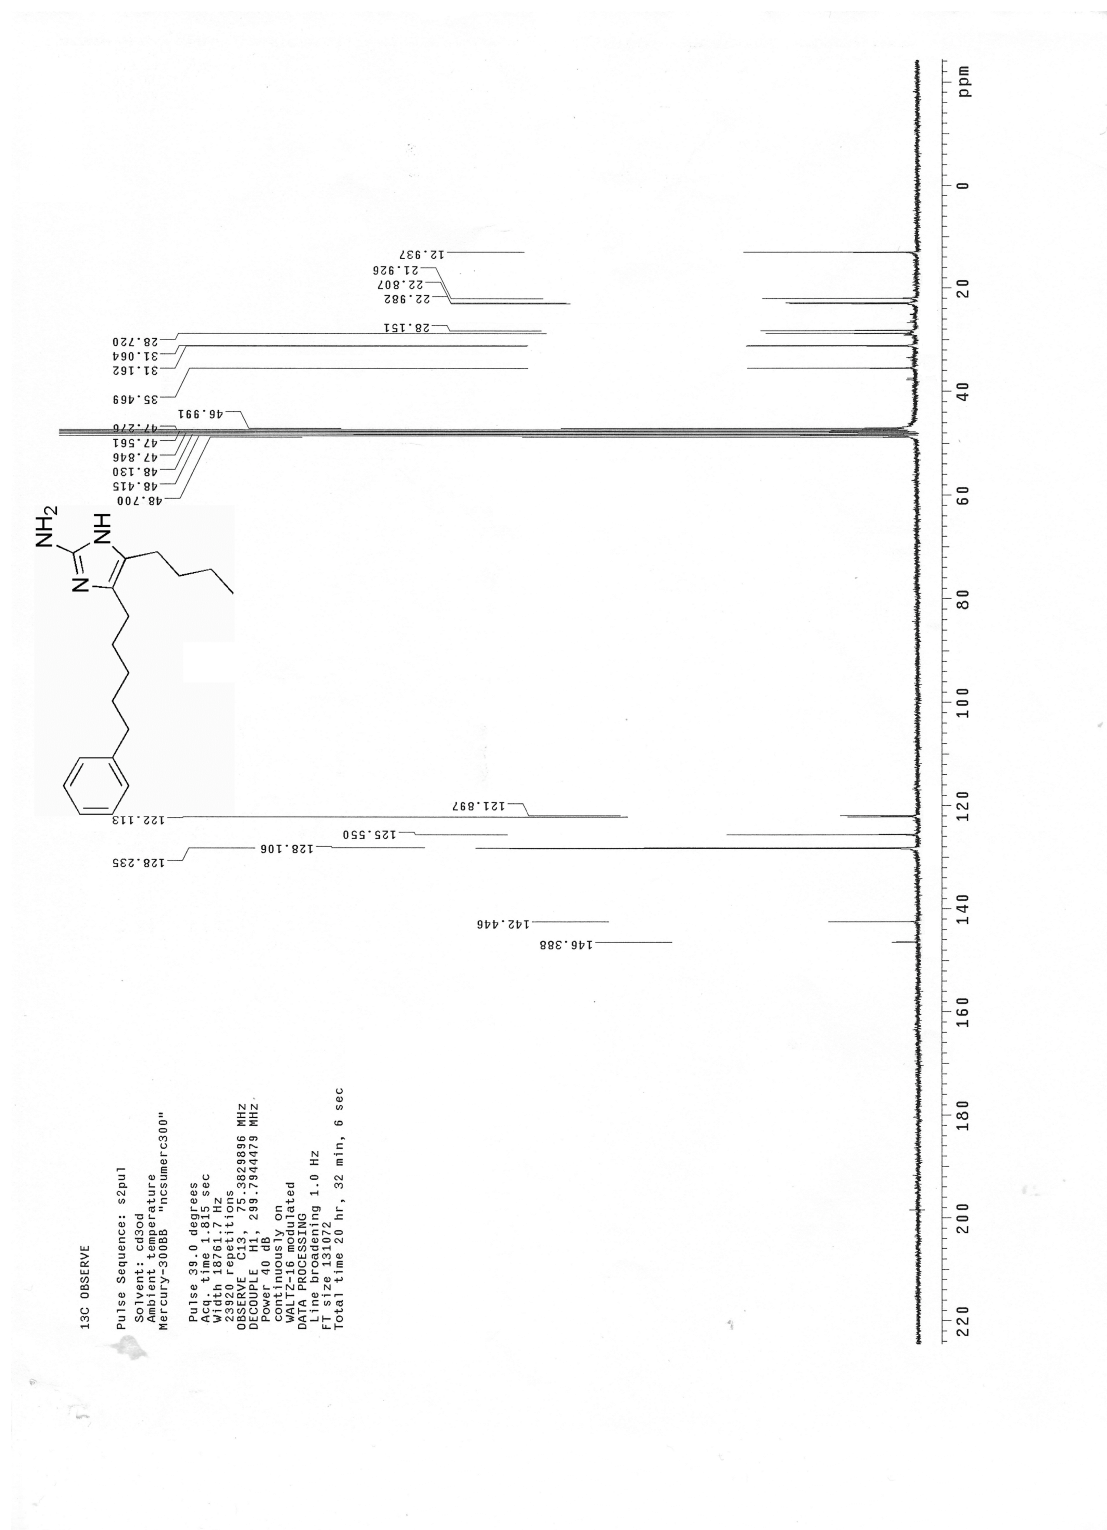

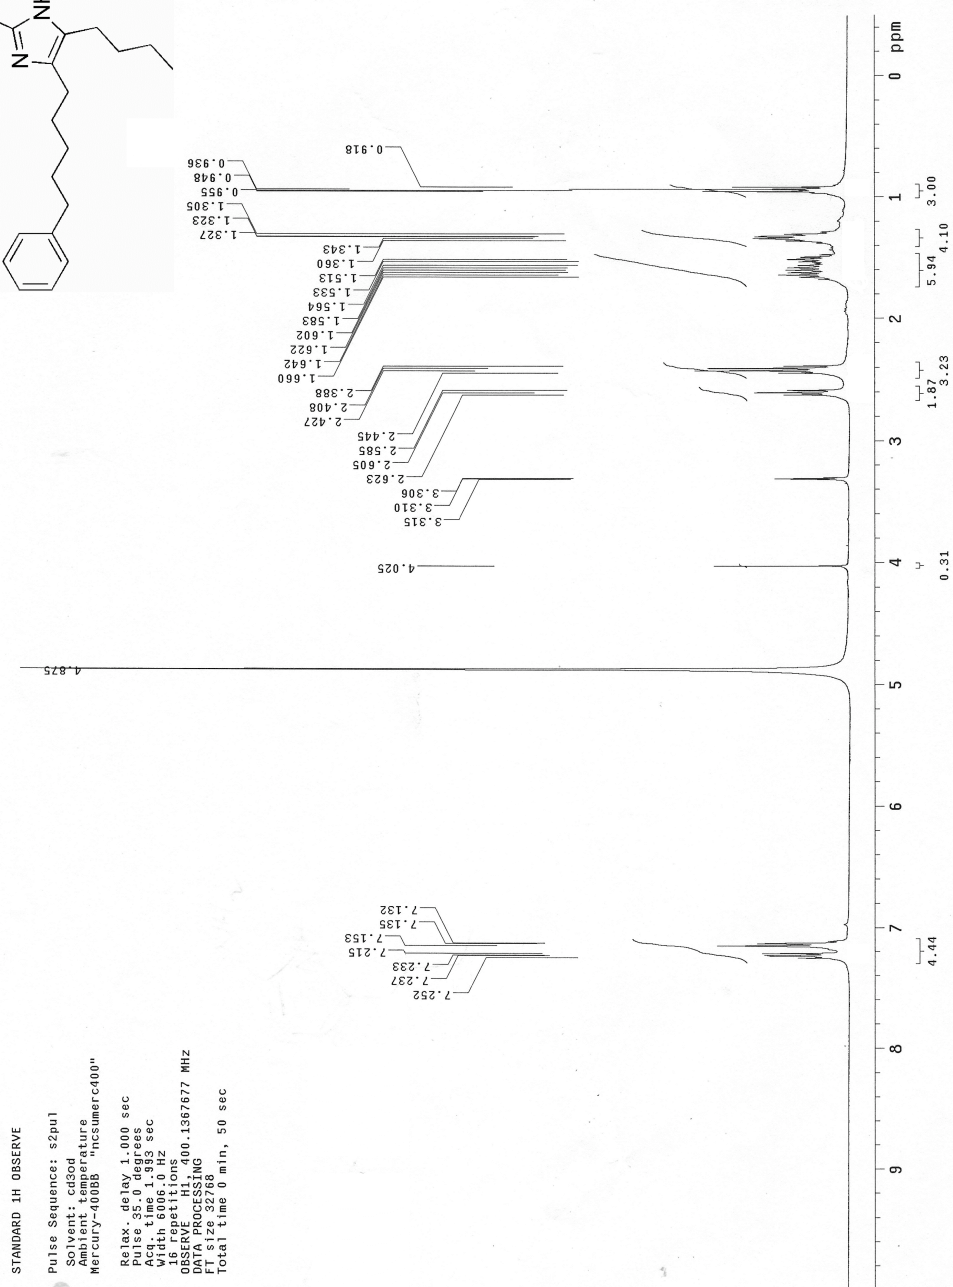



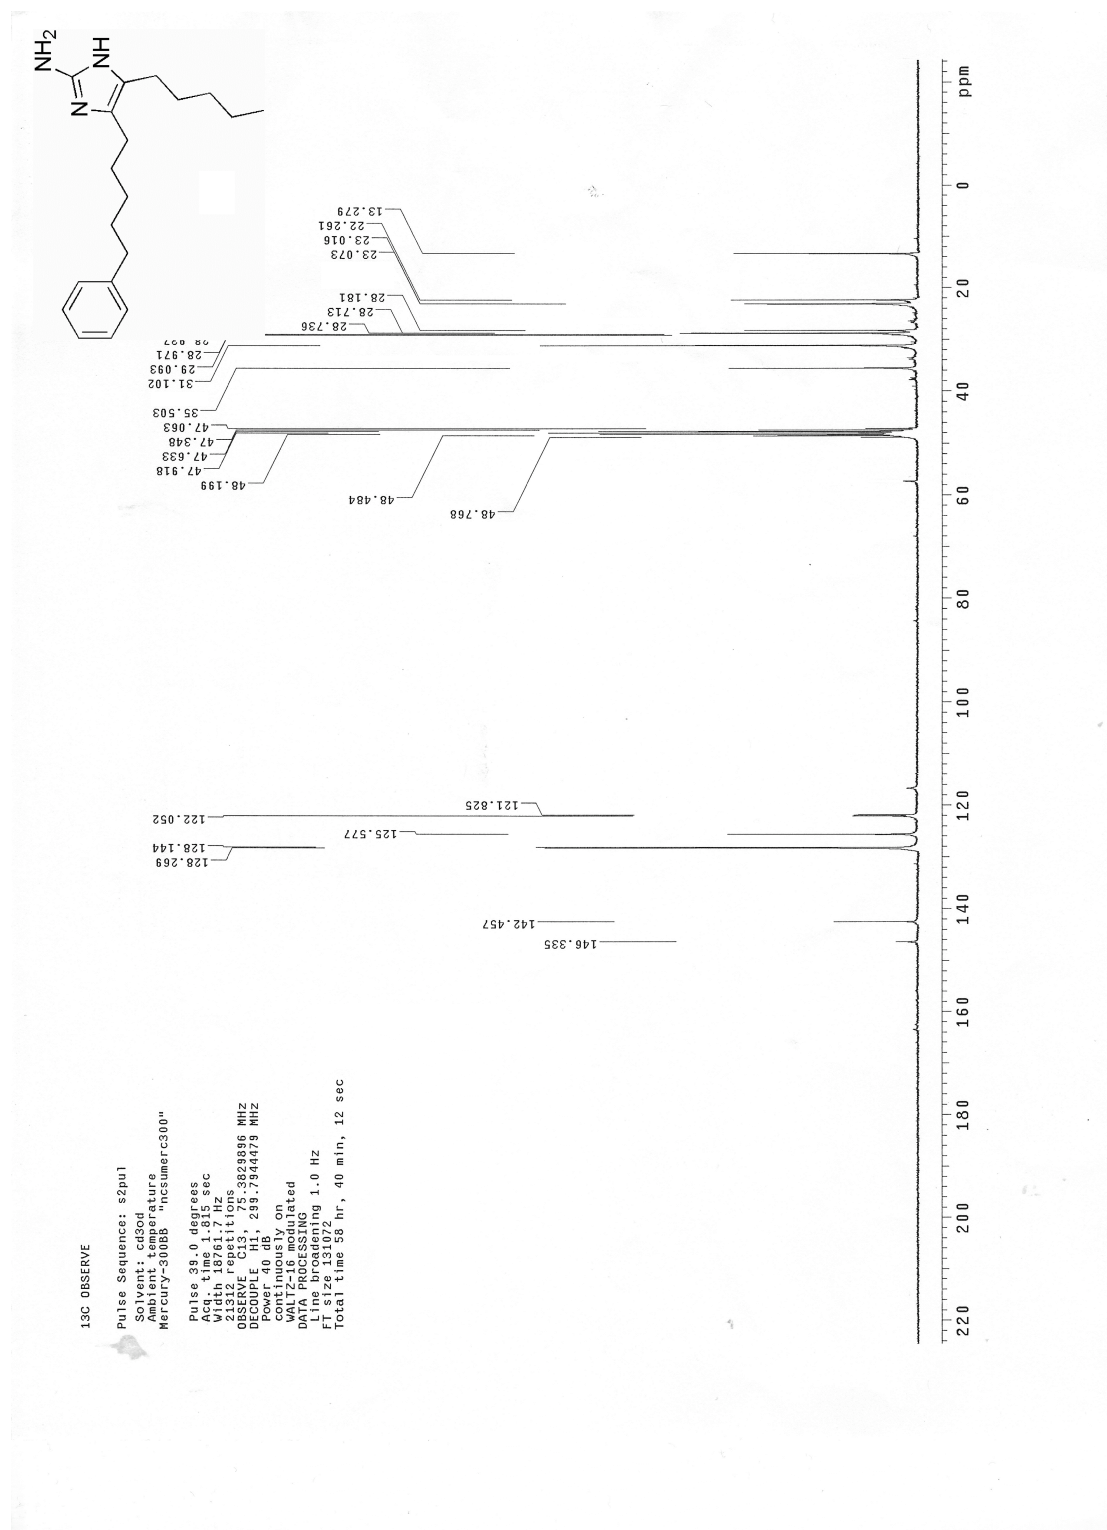

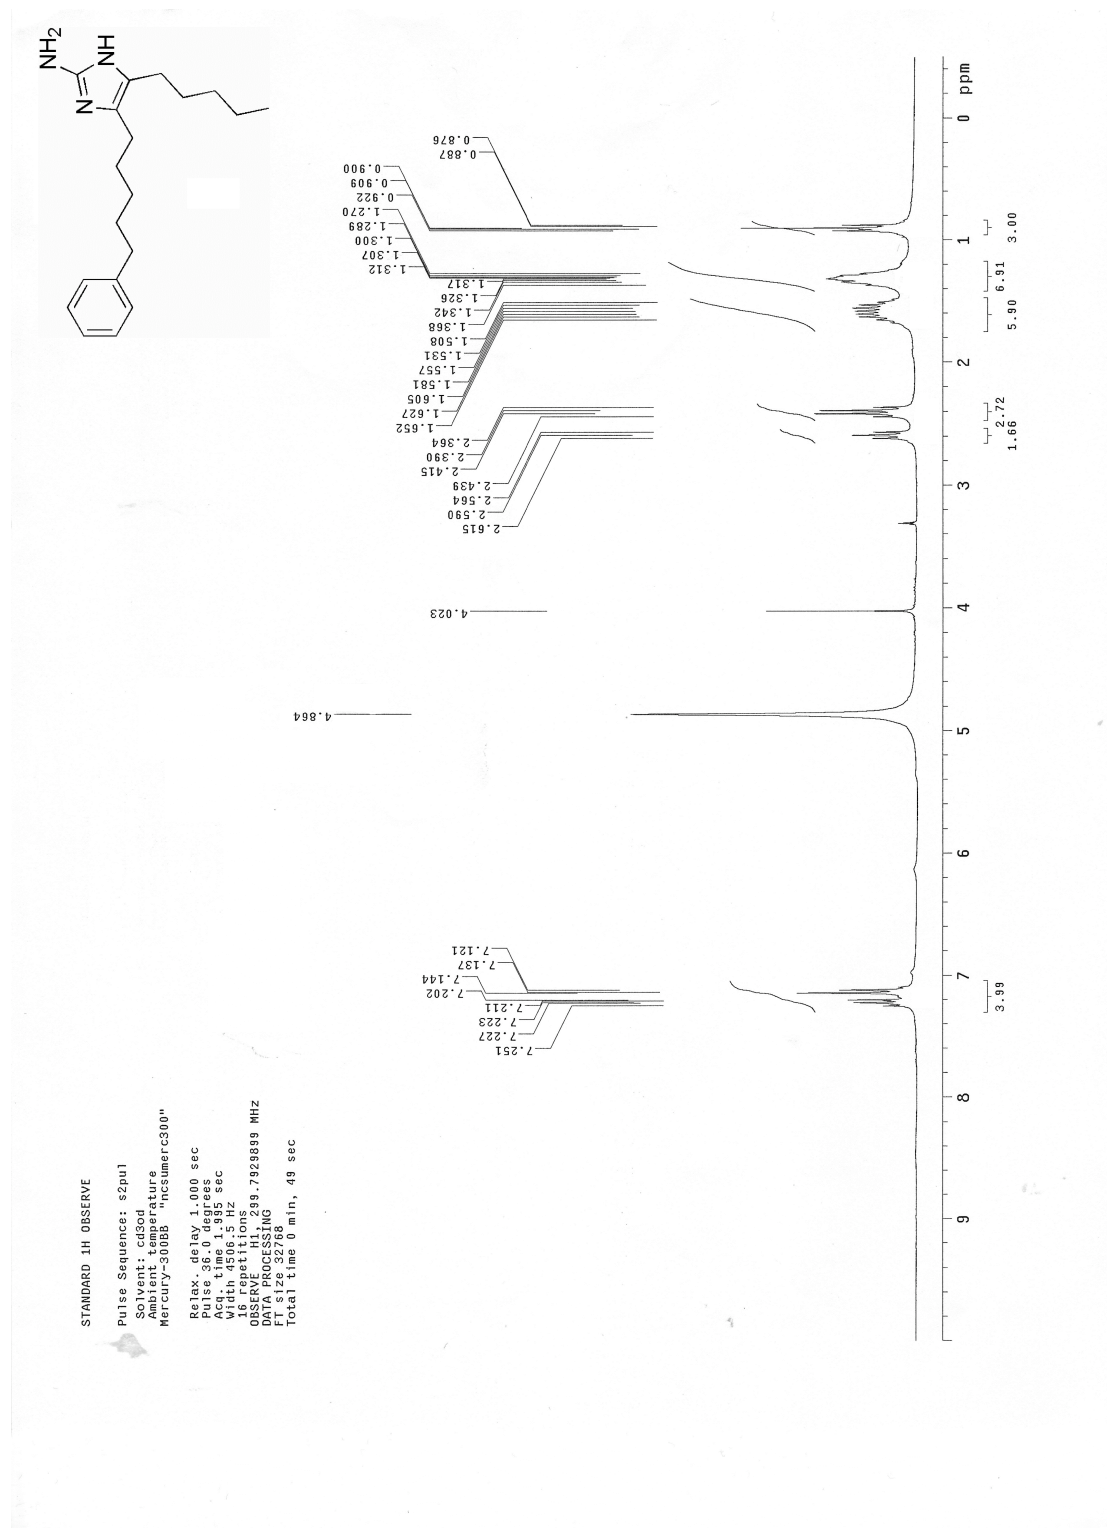

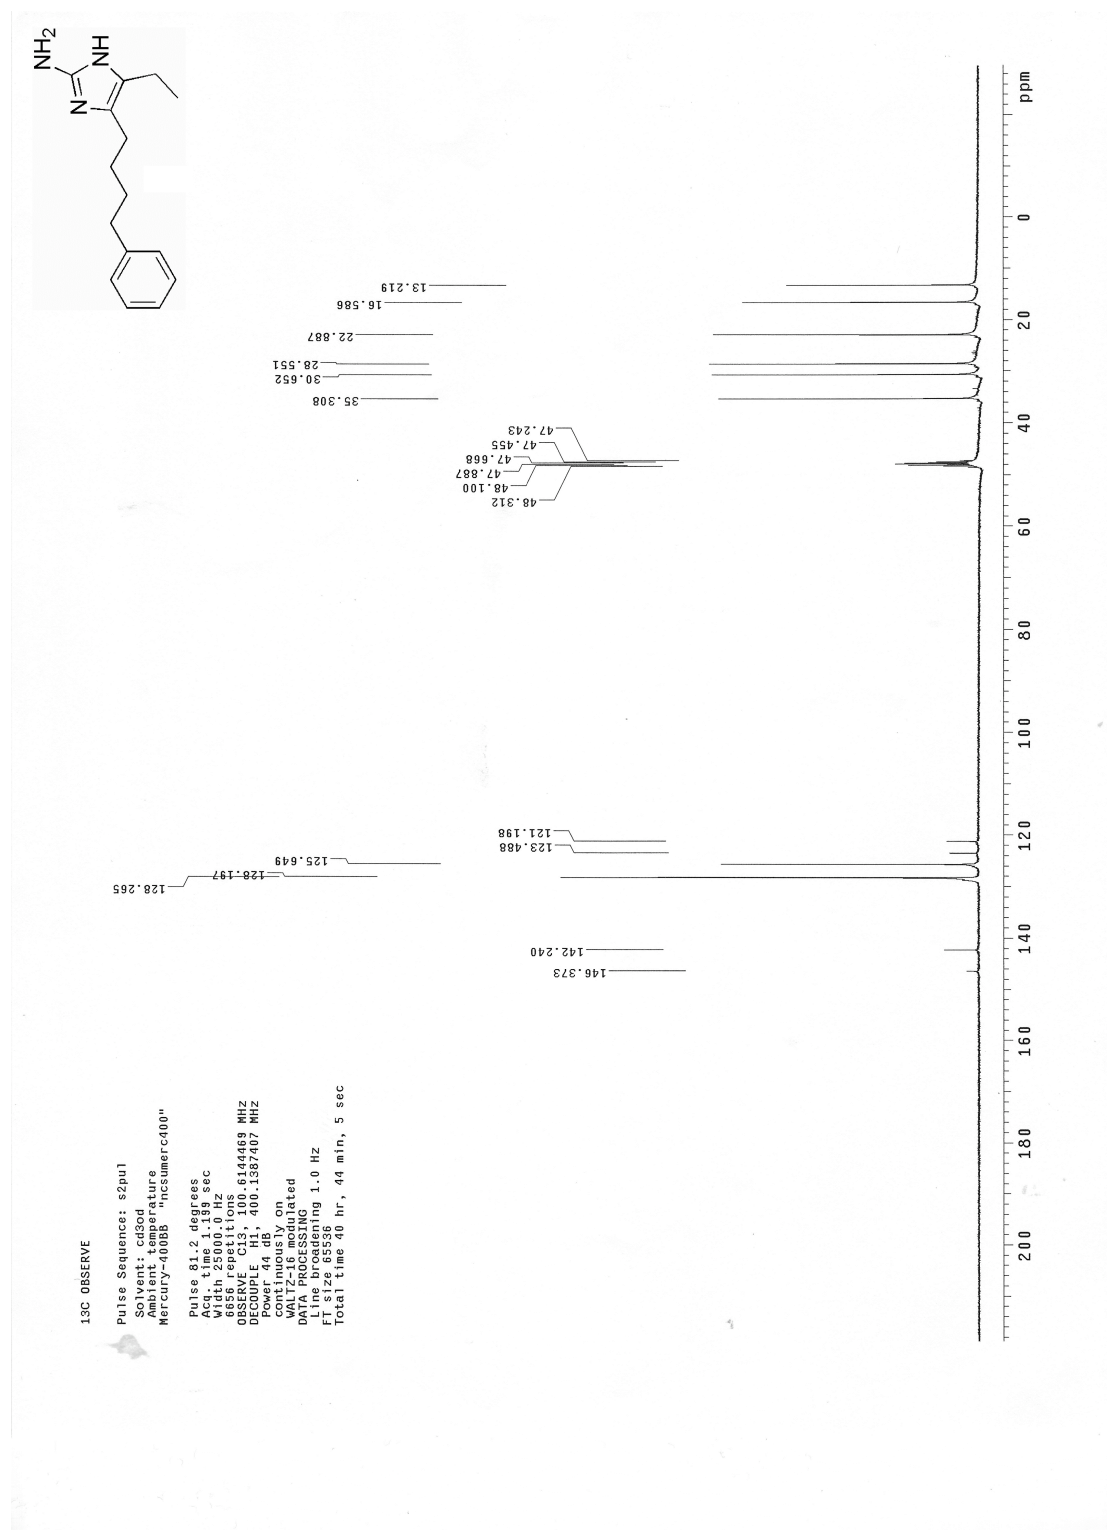

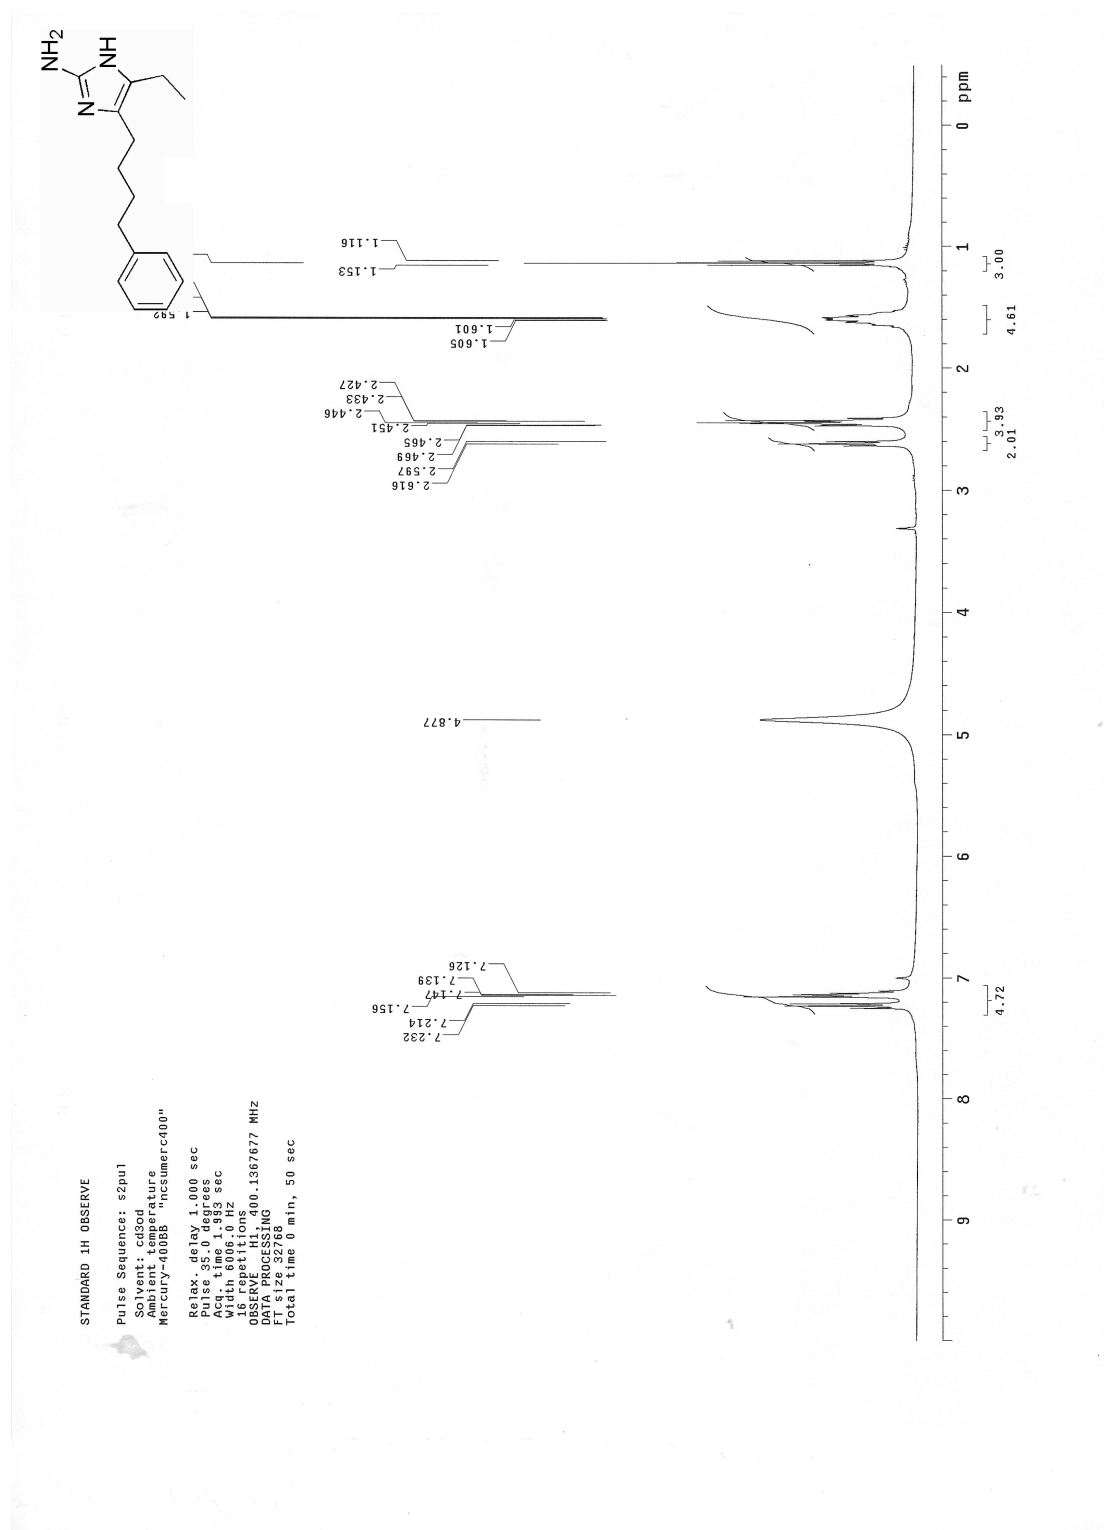

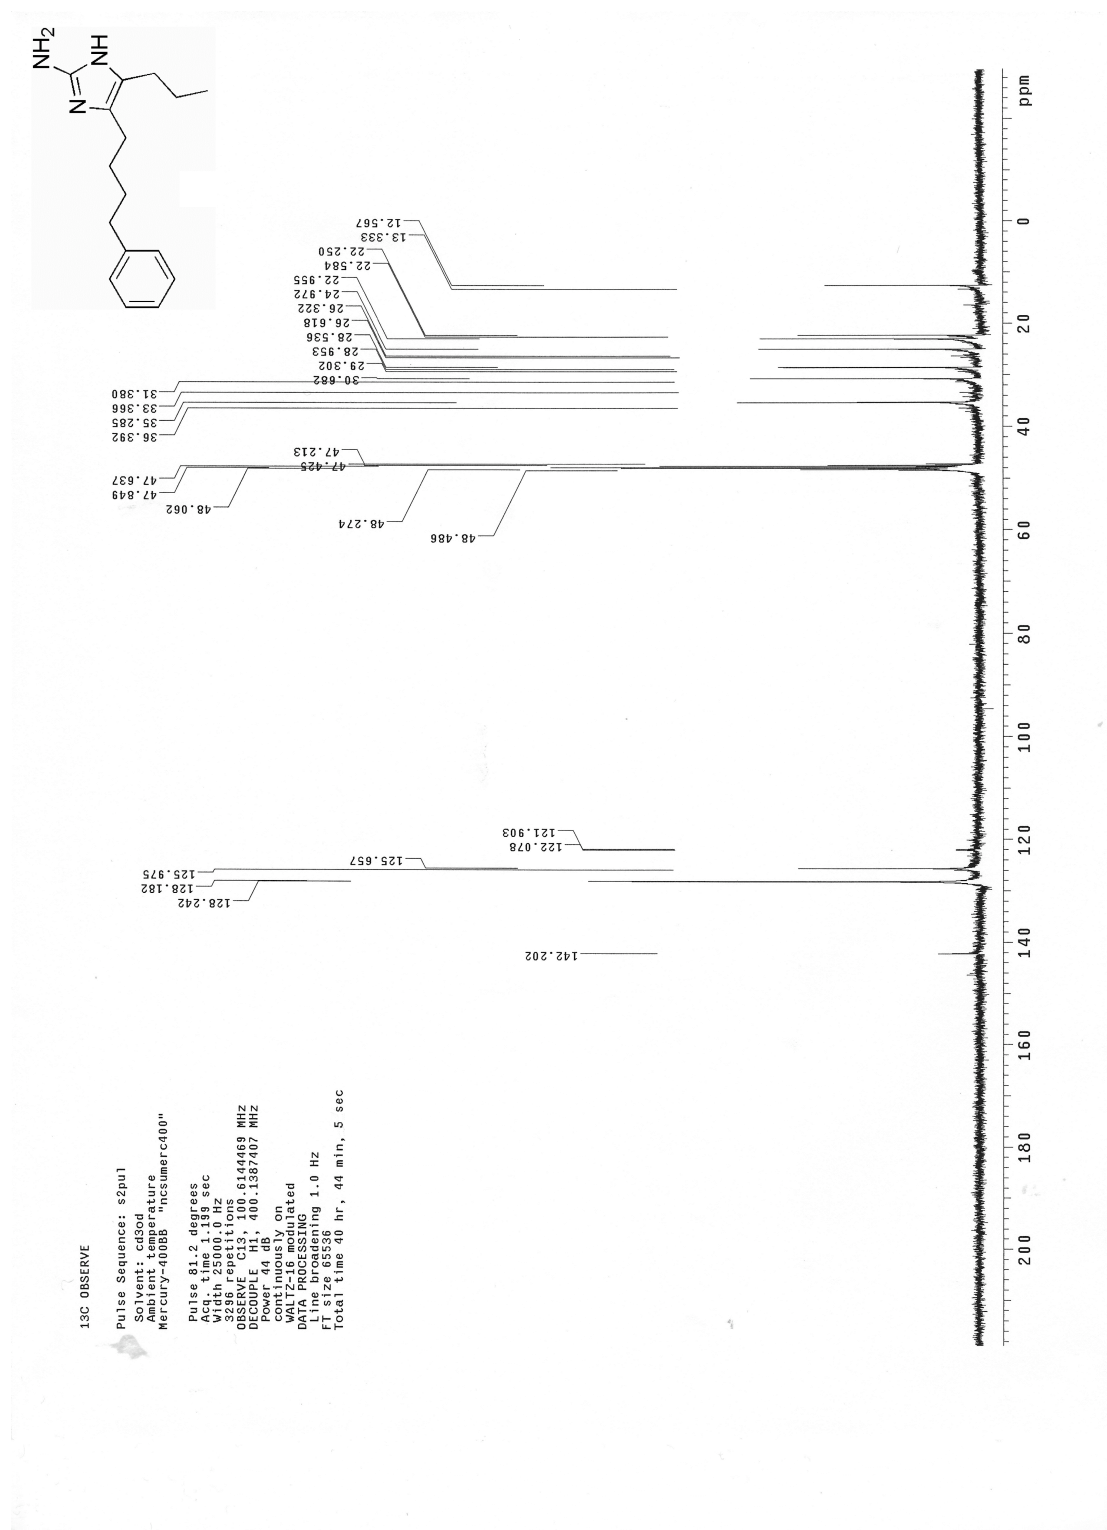



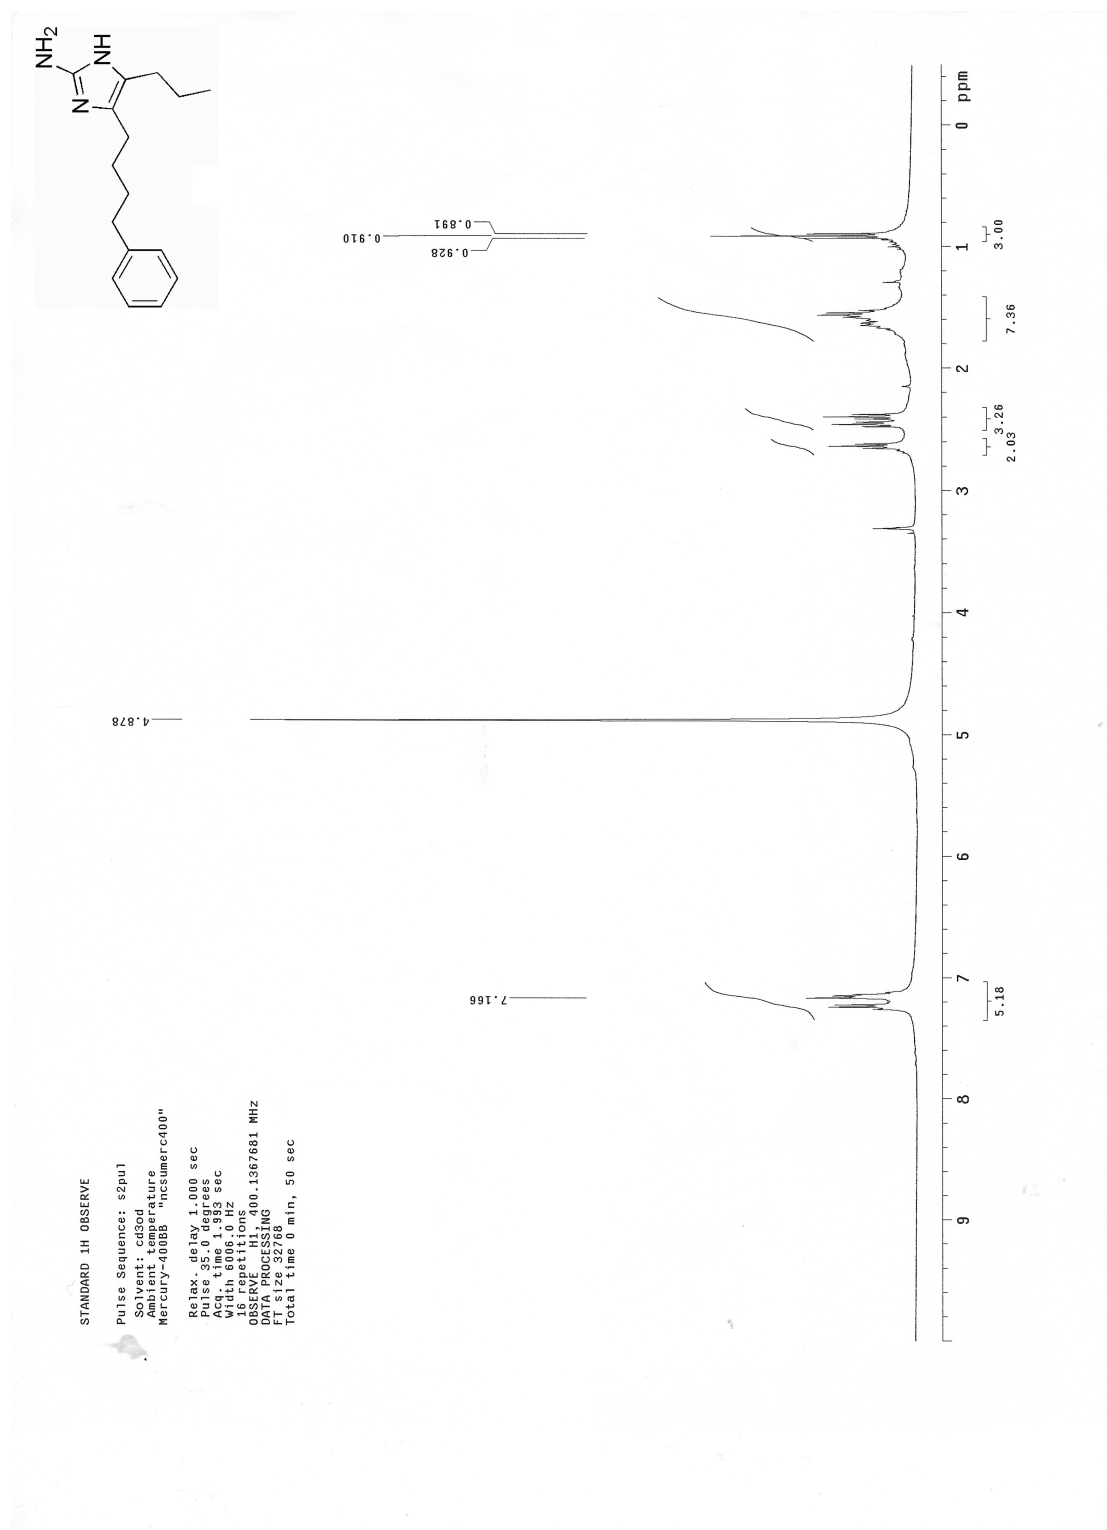

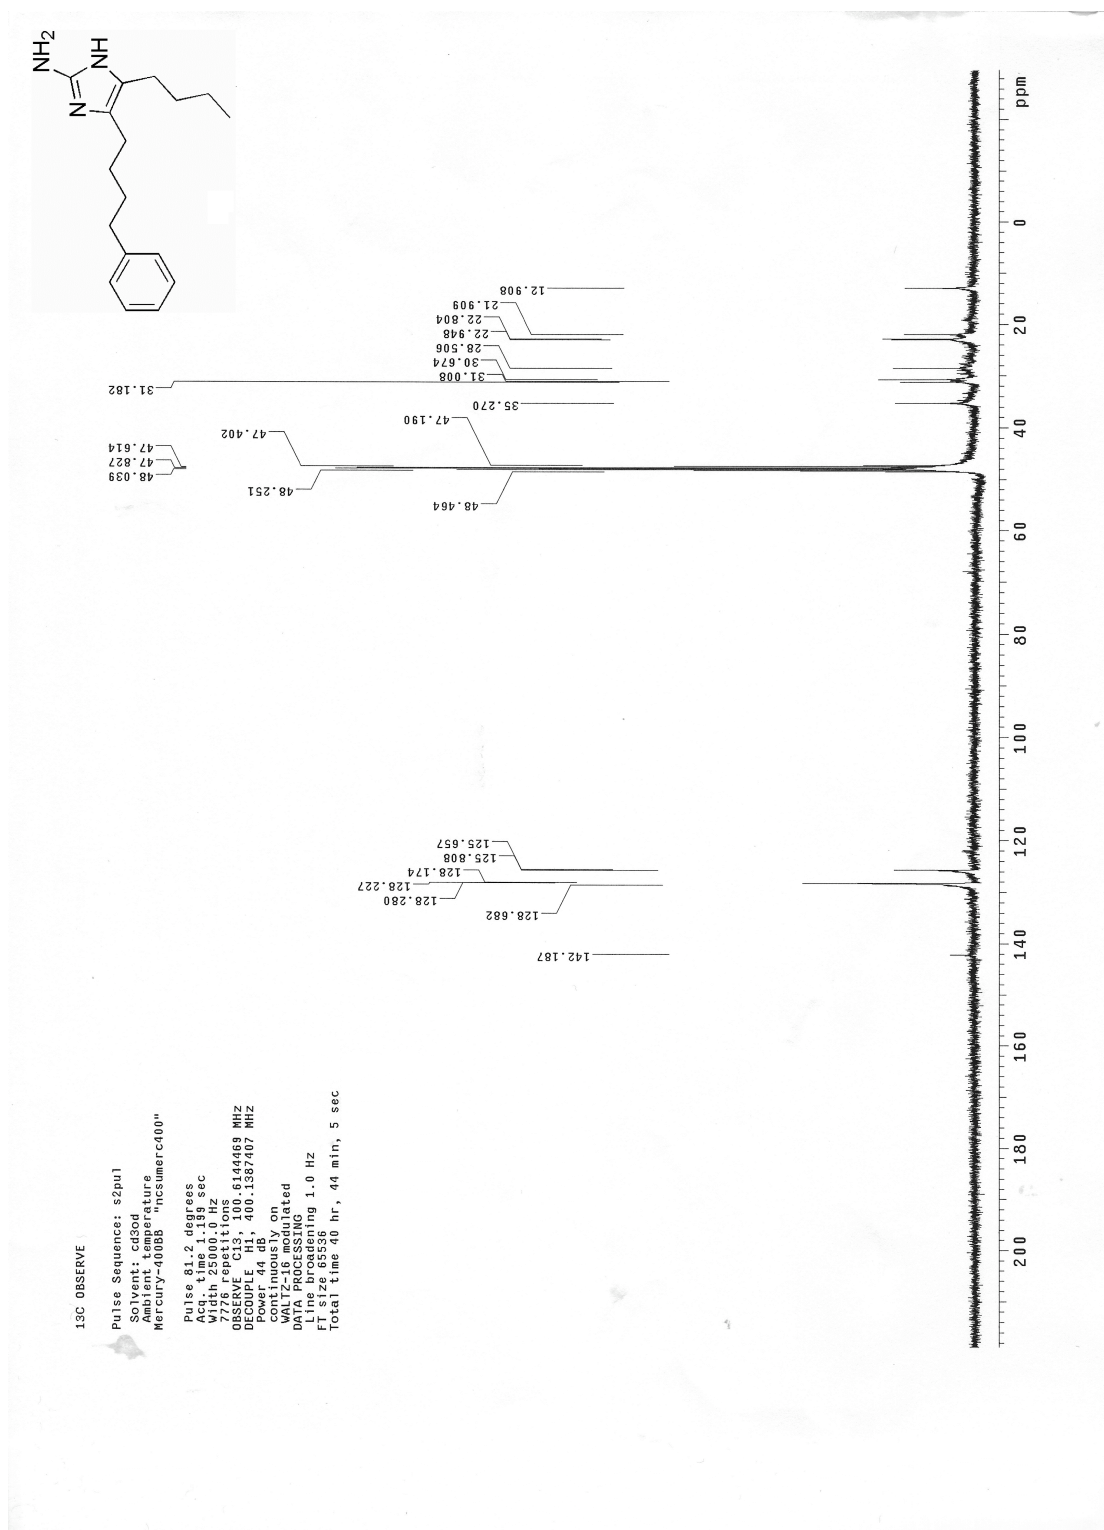

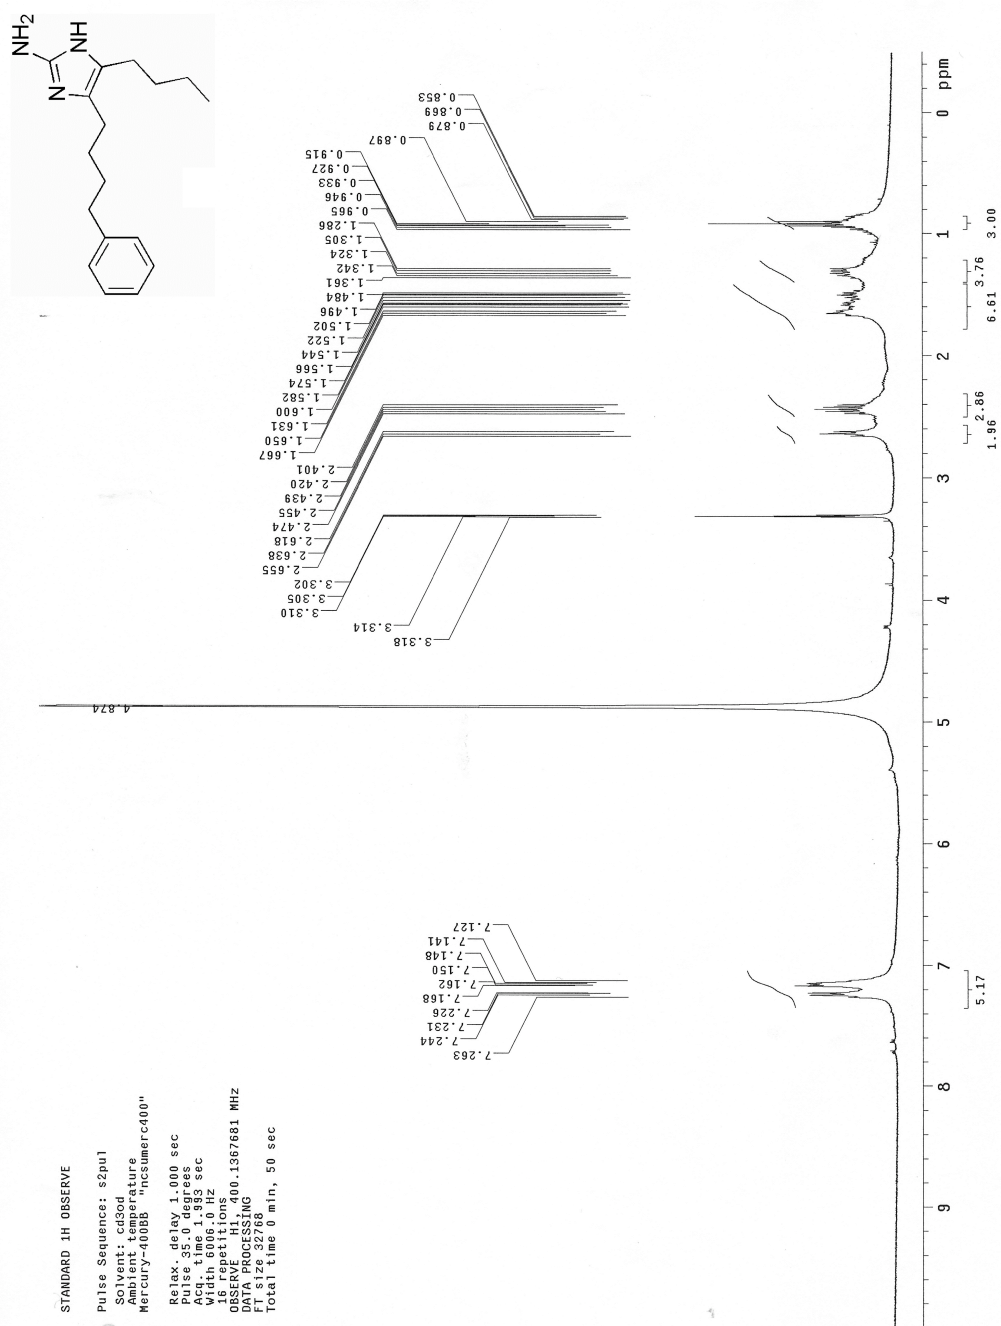



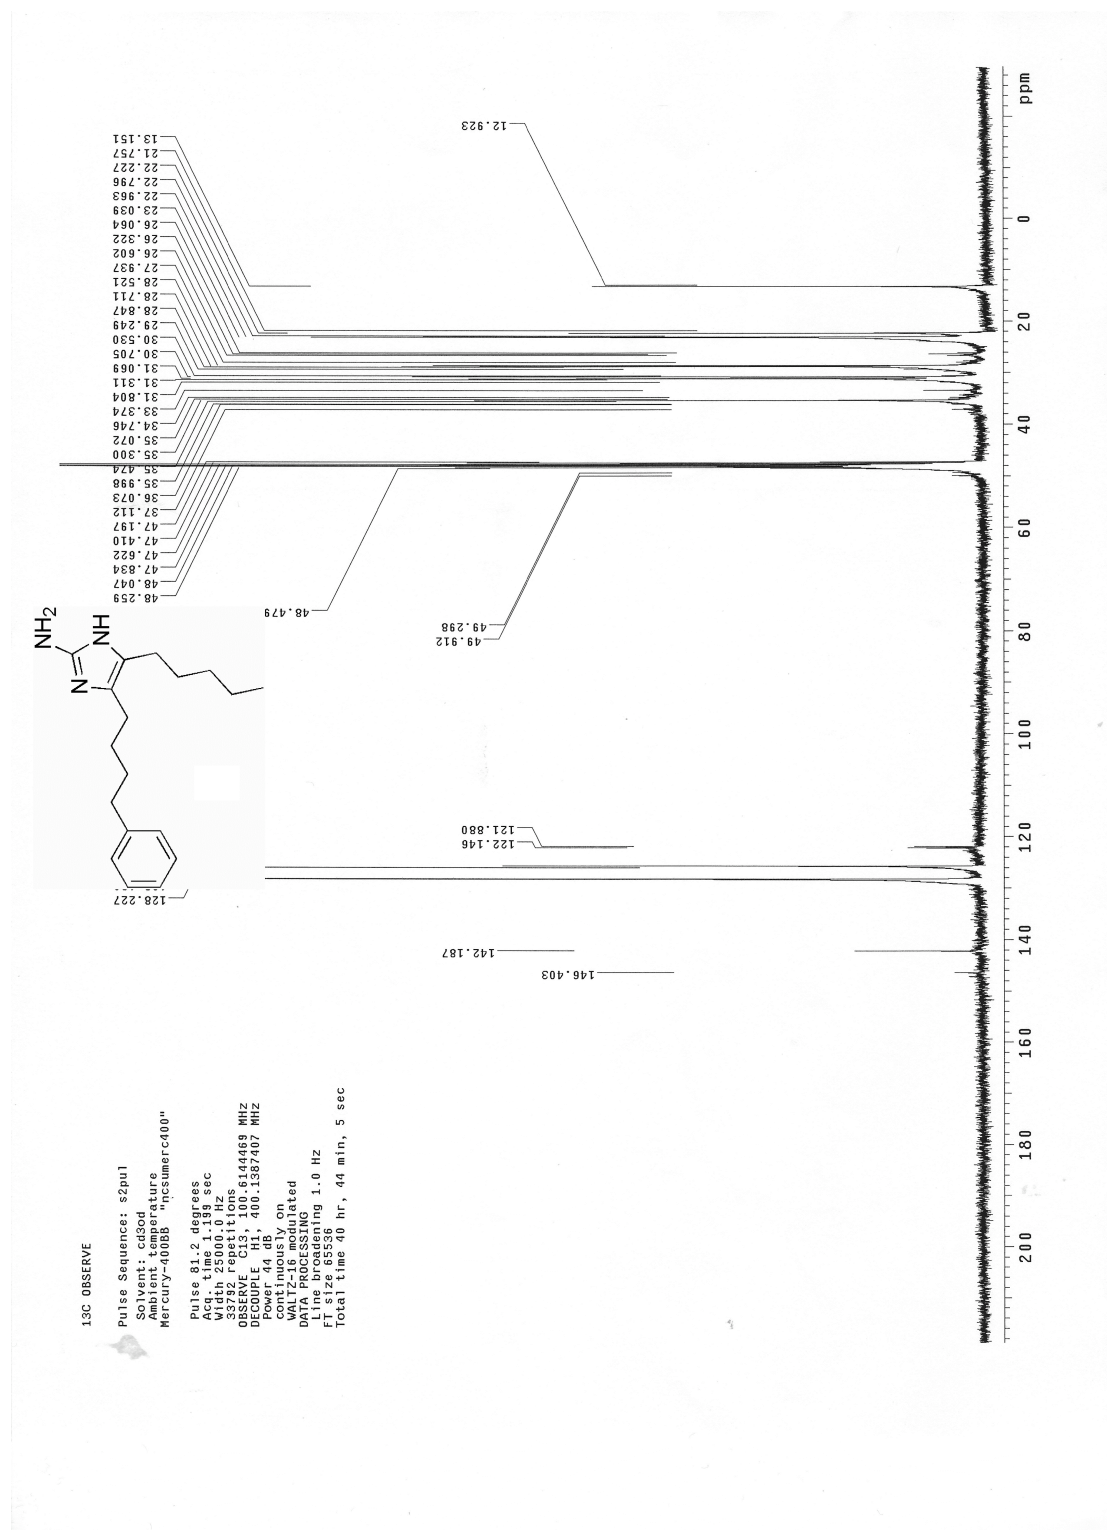

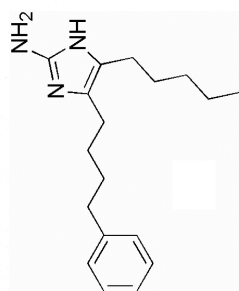

STANDARD 1H OBSERVE  
Pulse Sequence: s2pul  
Solvent: cdcl3  
Acq. Temp: 300.2 K  
Mercury-400BB "ncsumerc400"  
Relax. delay 1.000 sec  
Pulse 35.0 degrees  
Acq. time 1.993 sec  
NUC1 13C  
16 Repetitions  
OBSERVE H1, 400.1367674 MHz  
DATA PROCESSING  
F2 400.1367674 MHz  
Total time 0 min, 50 sec

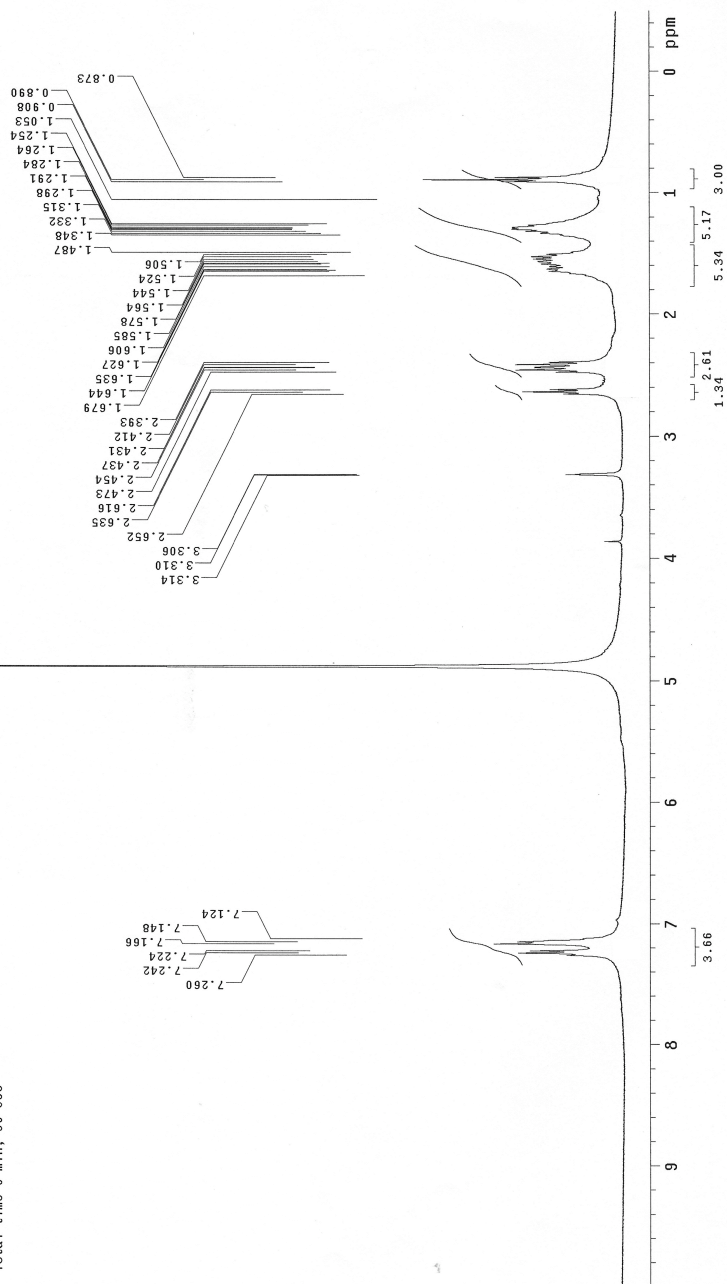

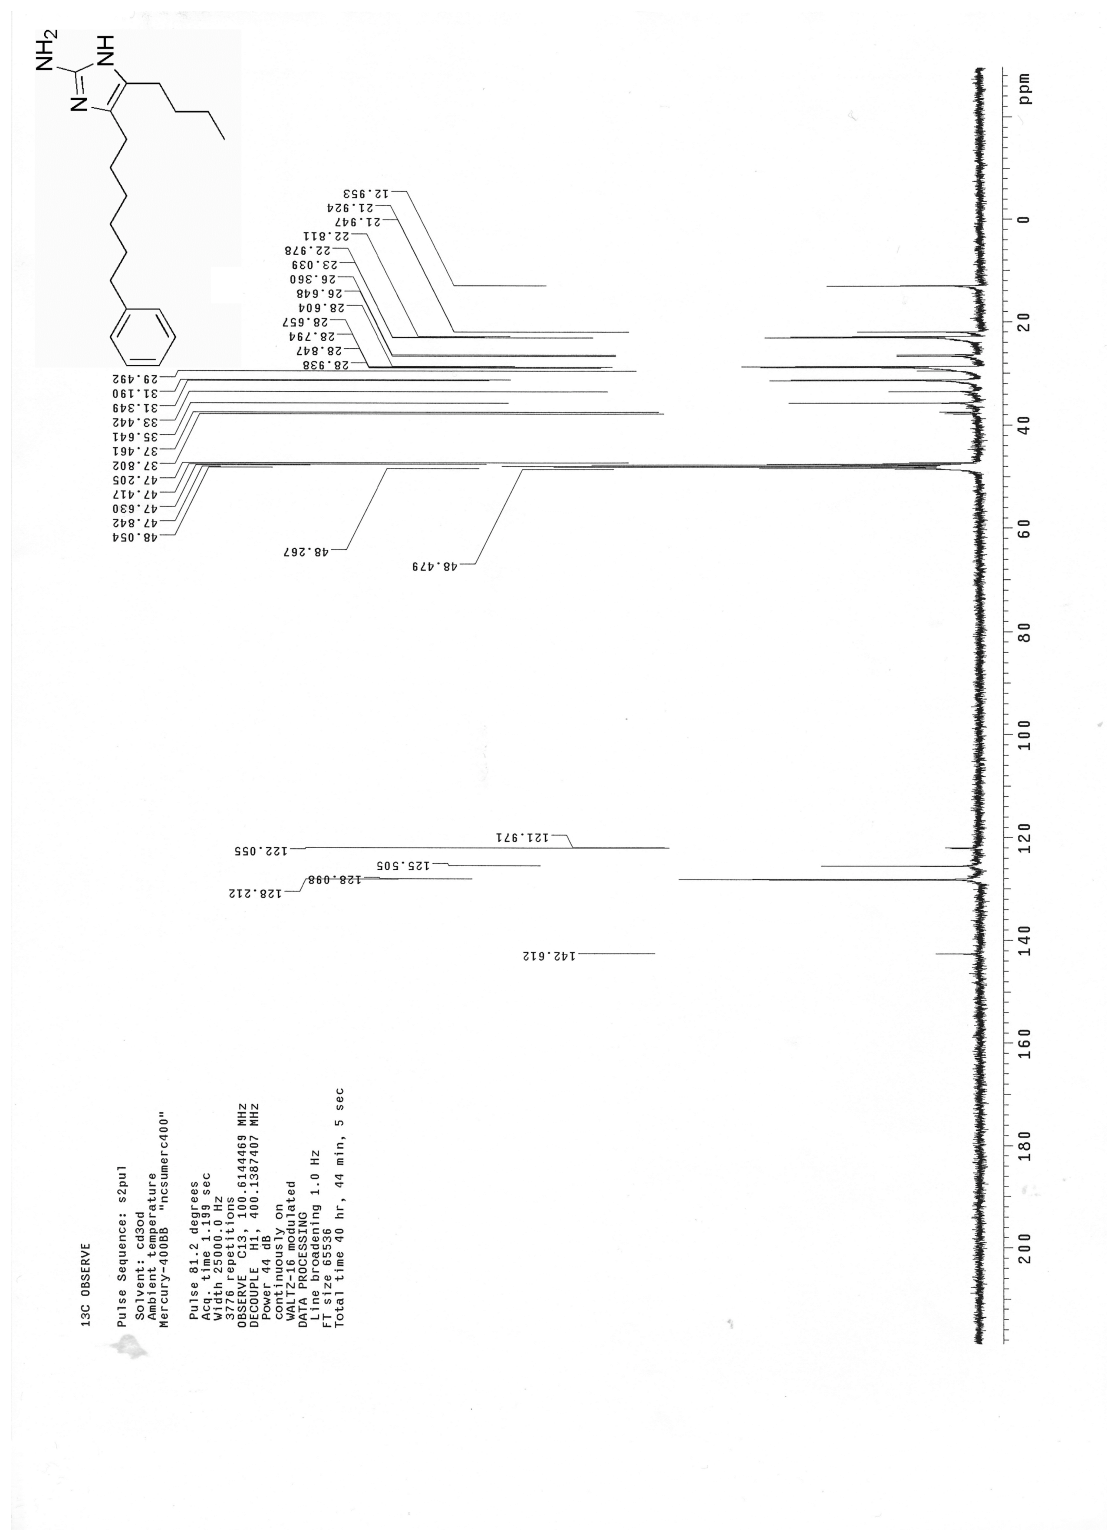

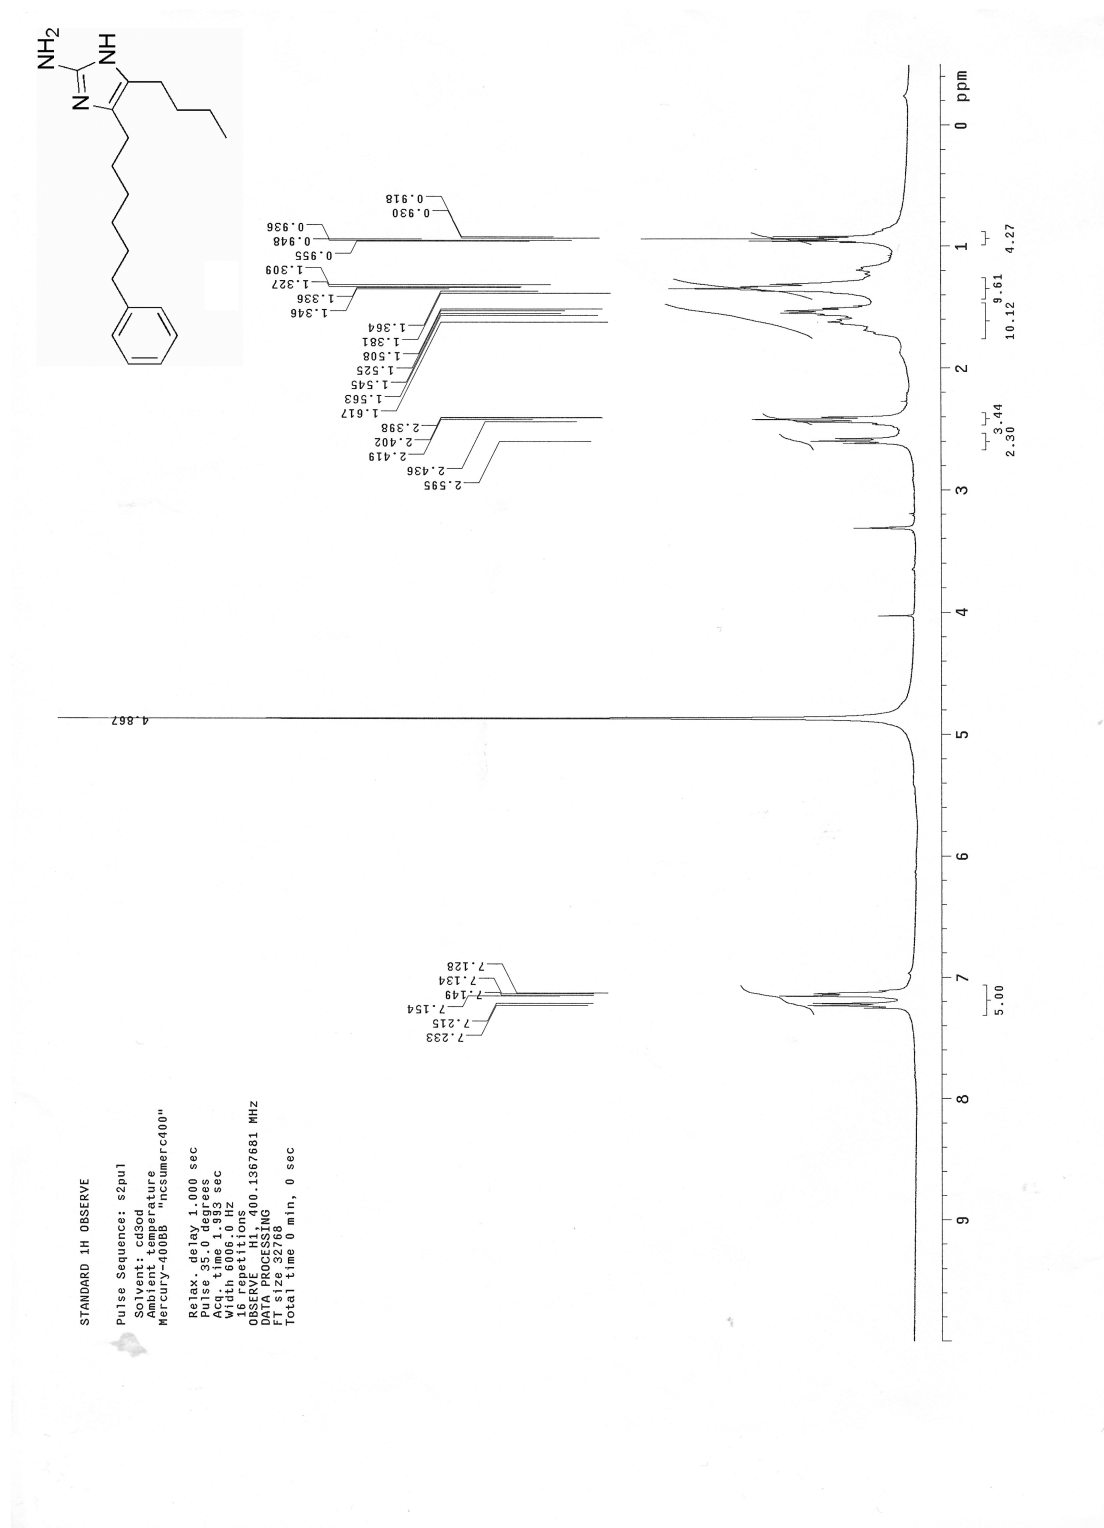

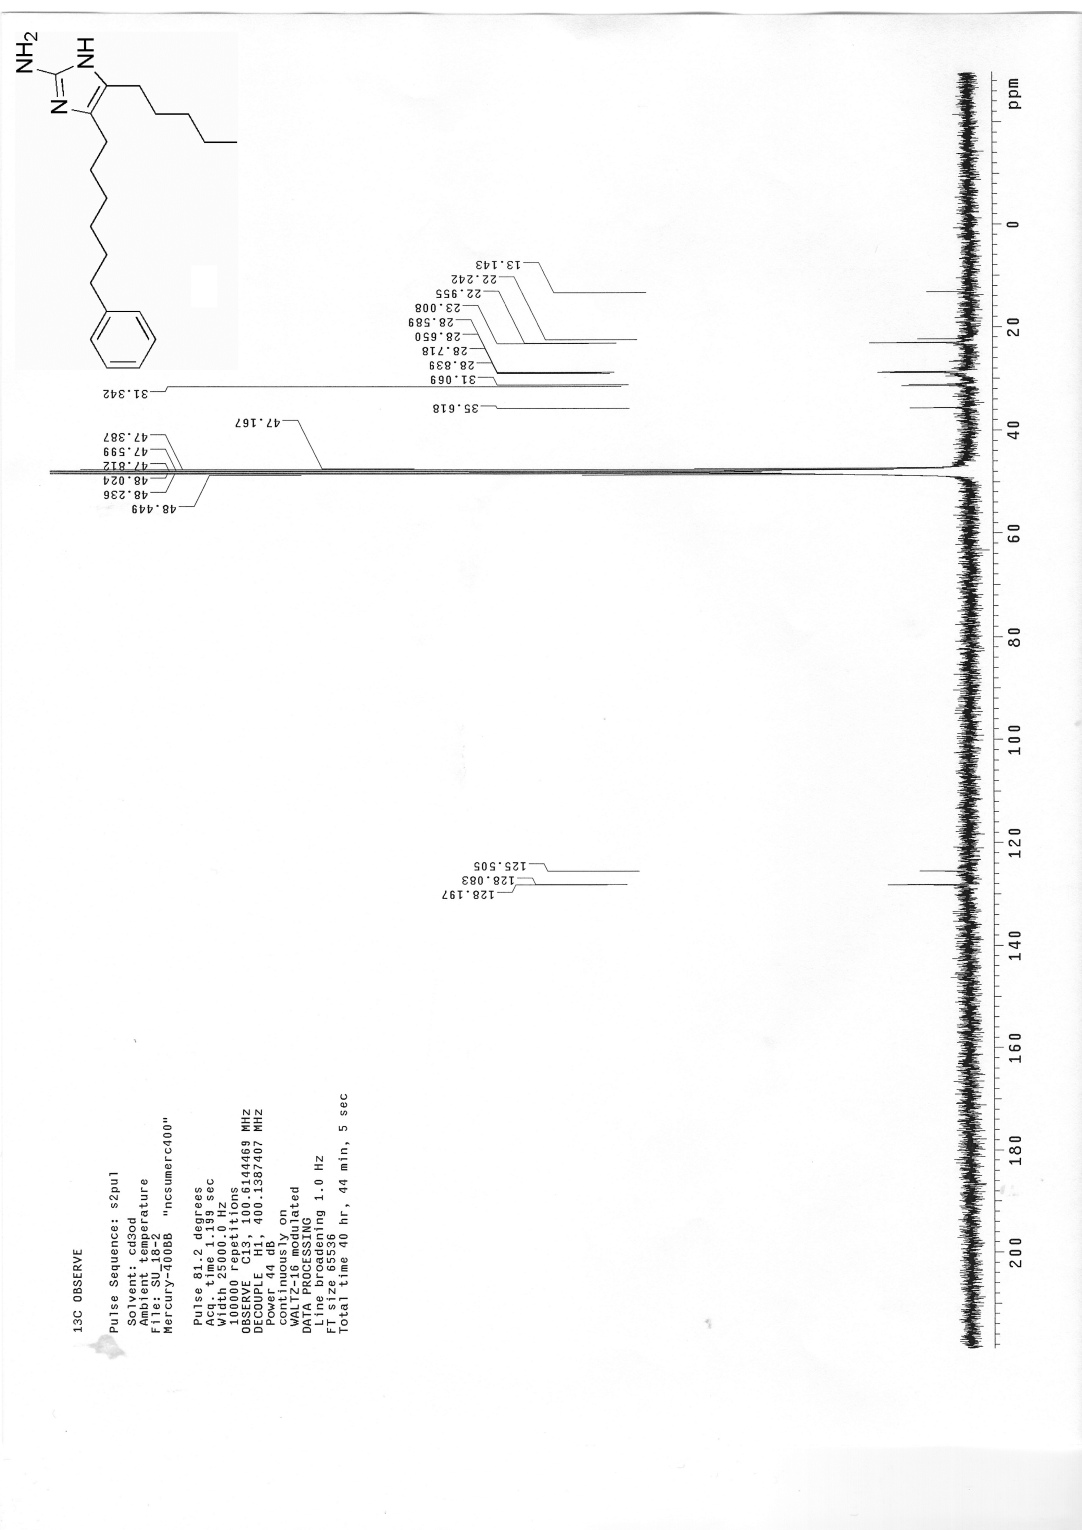



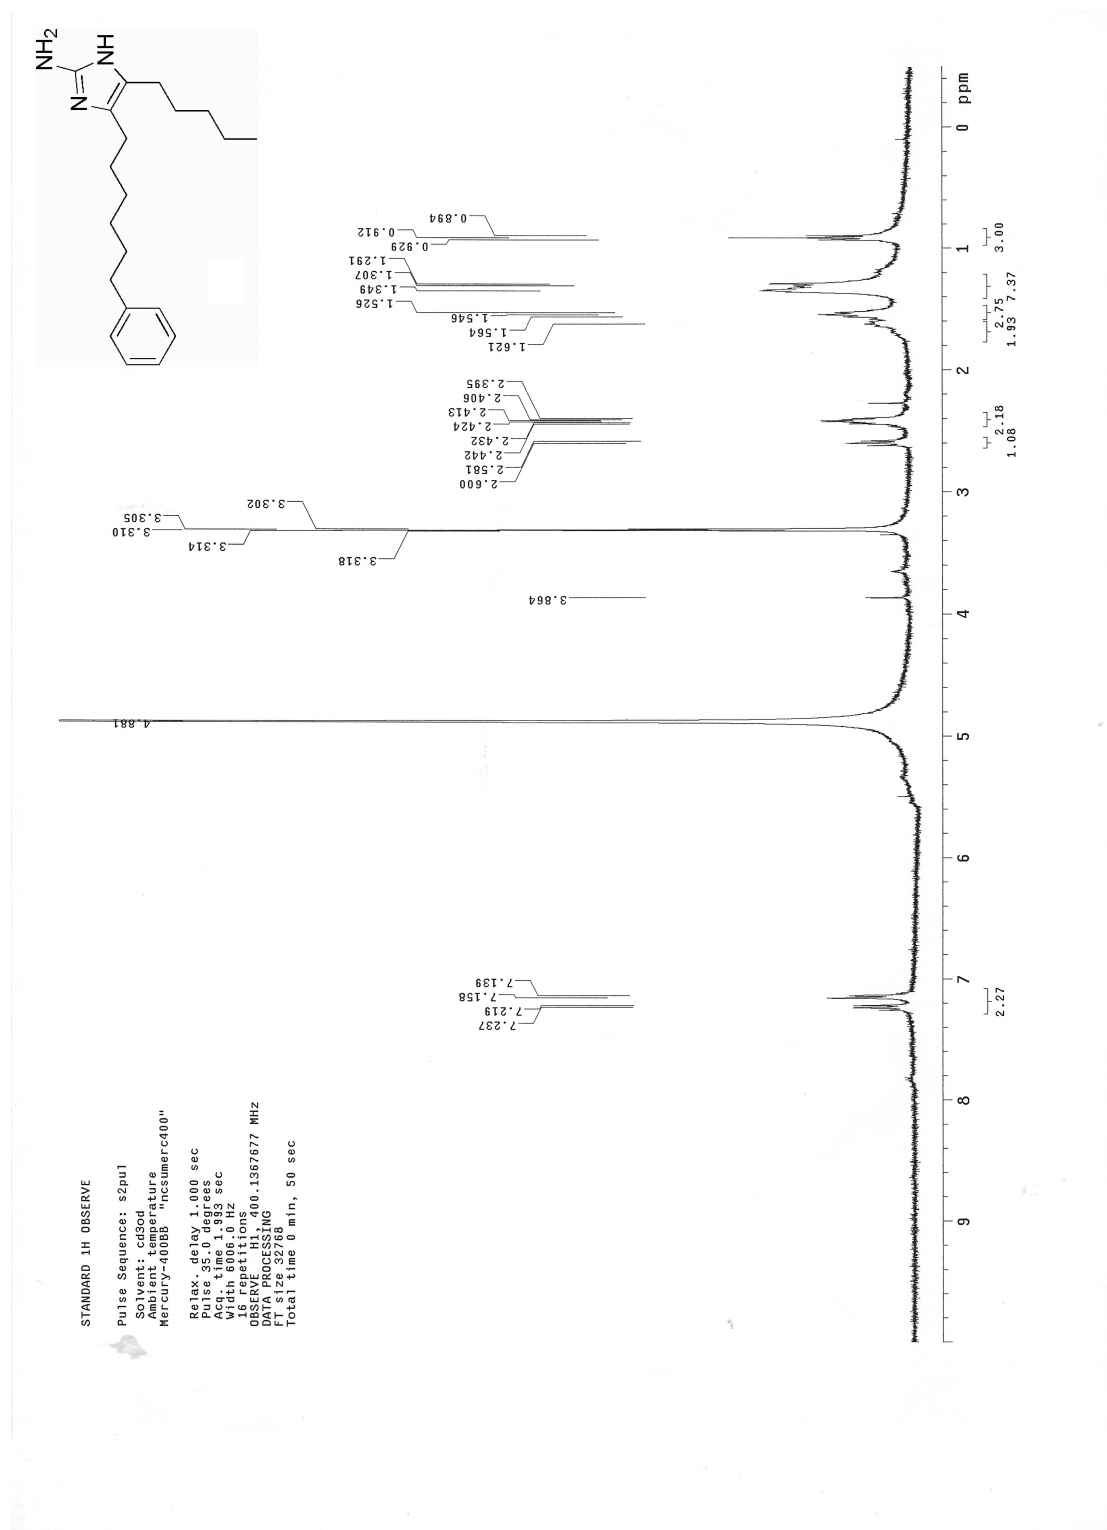

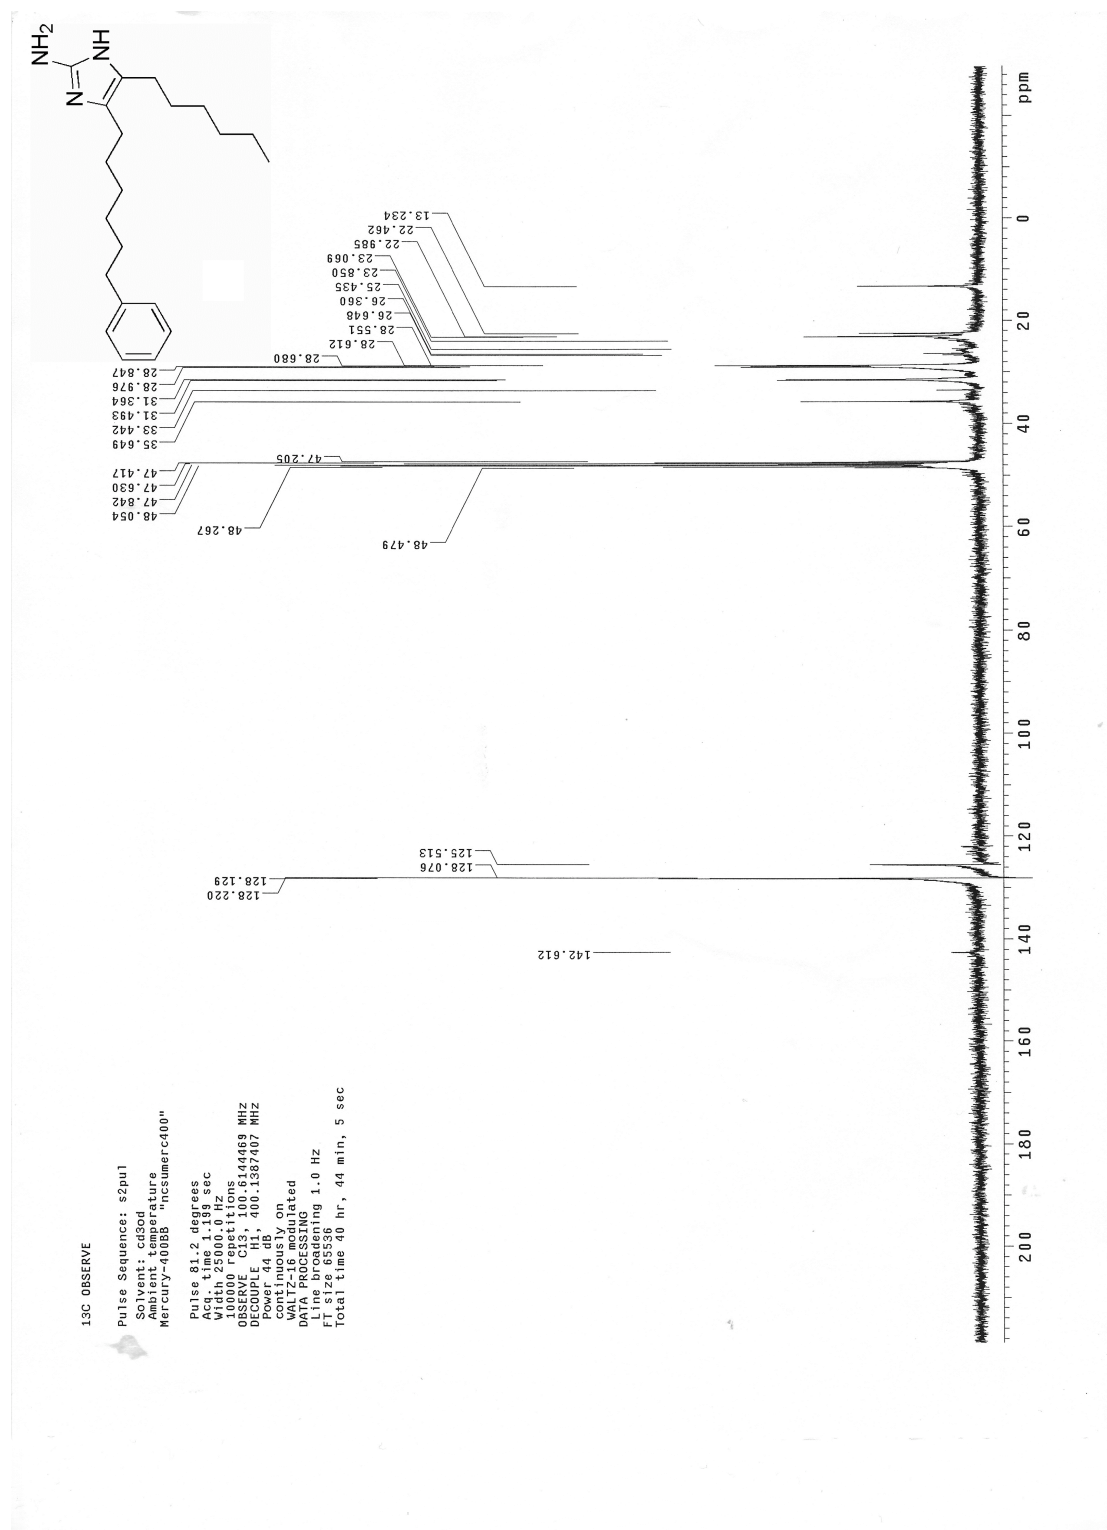

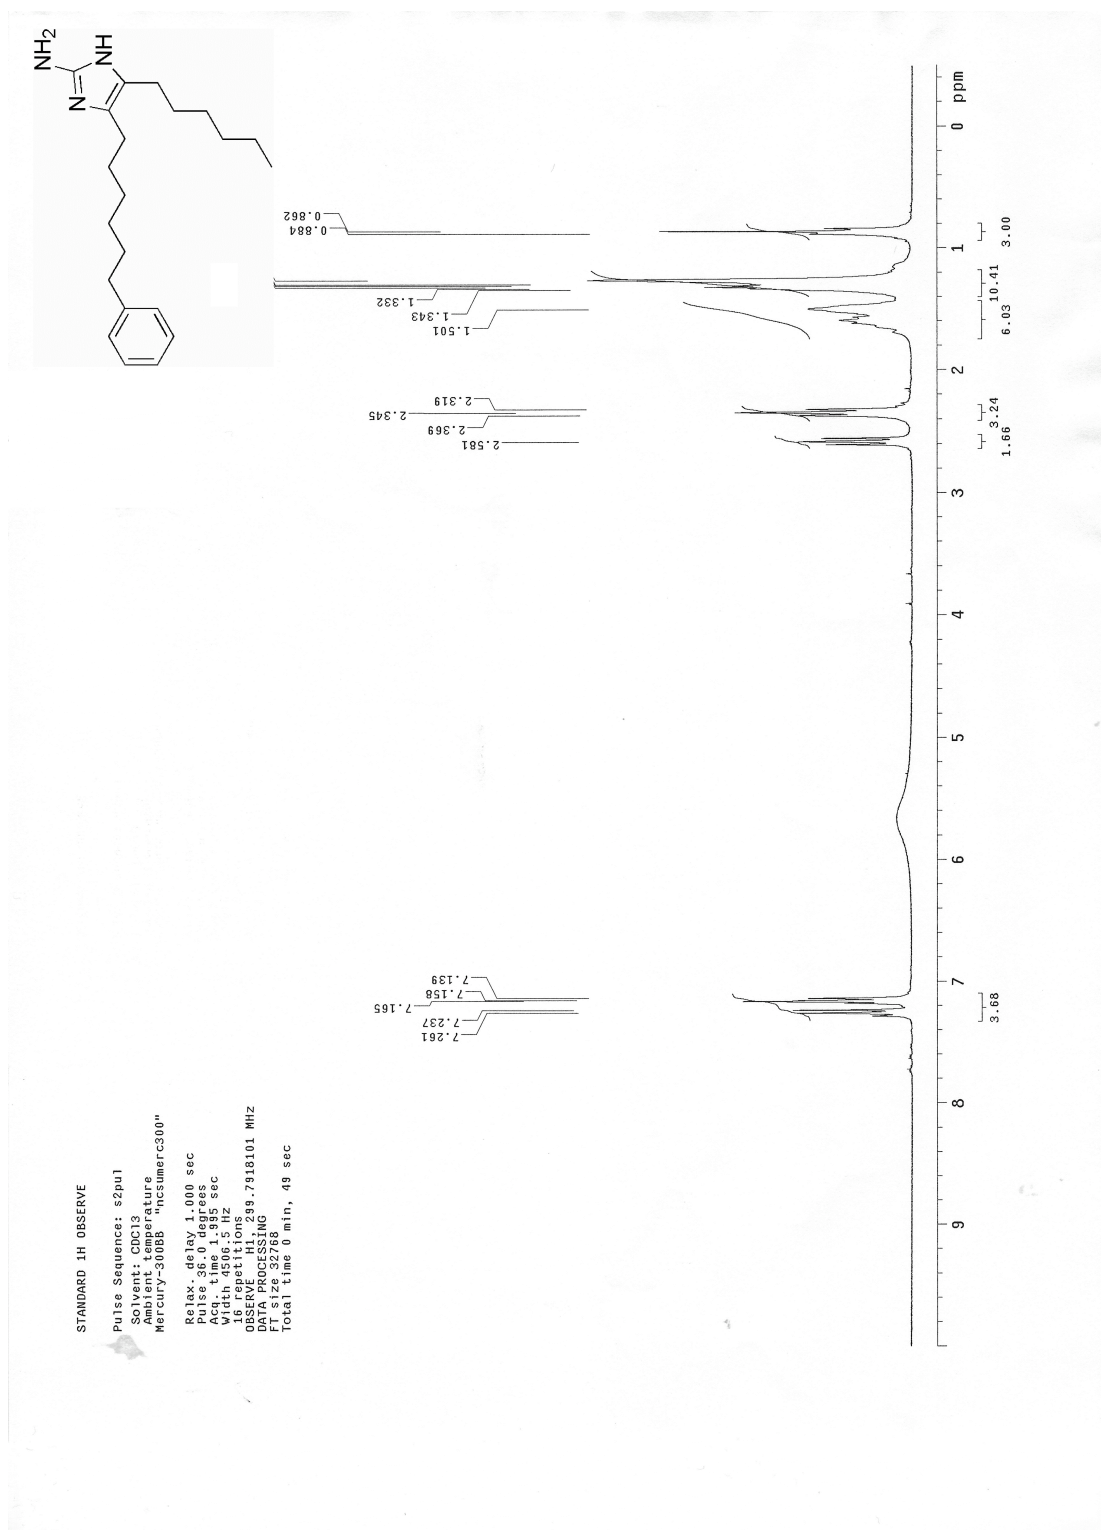



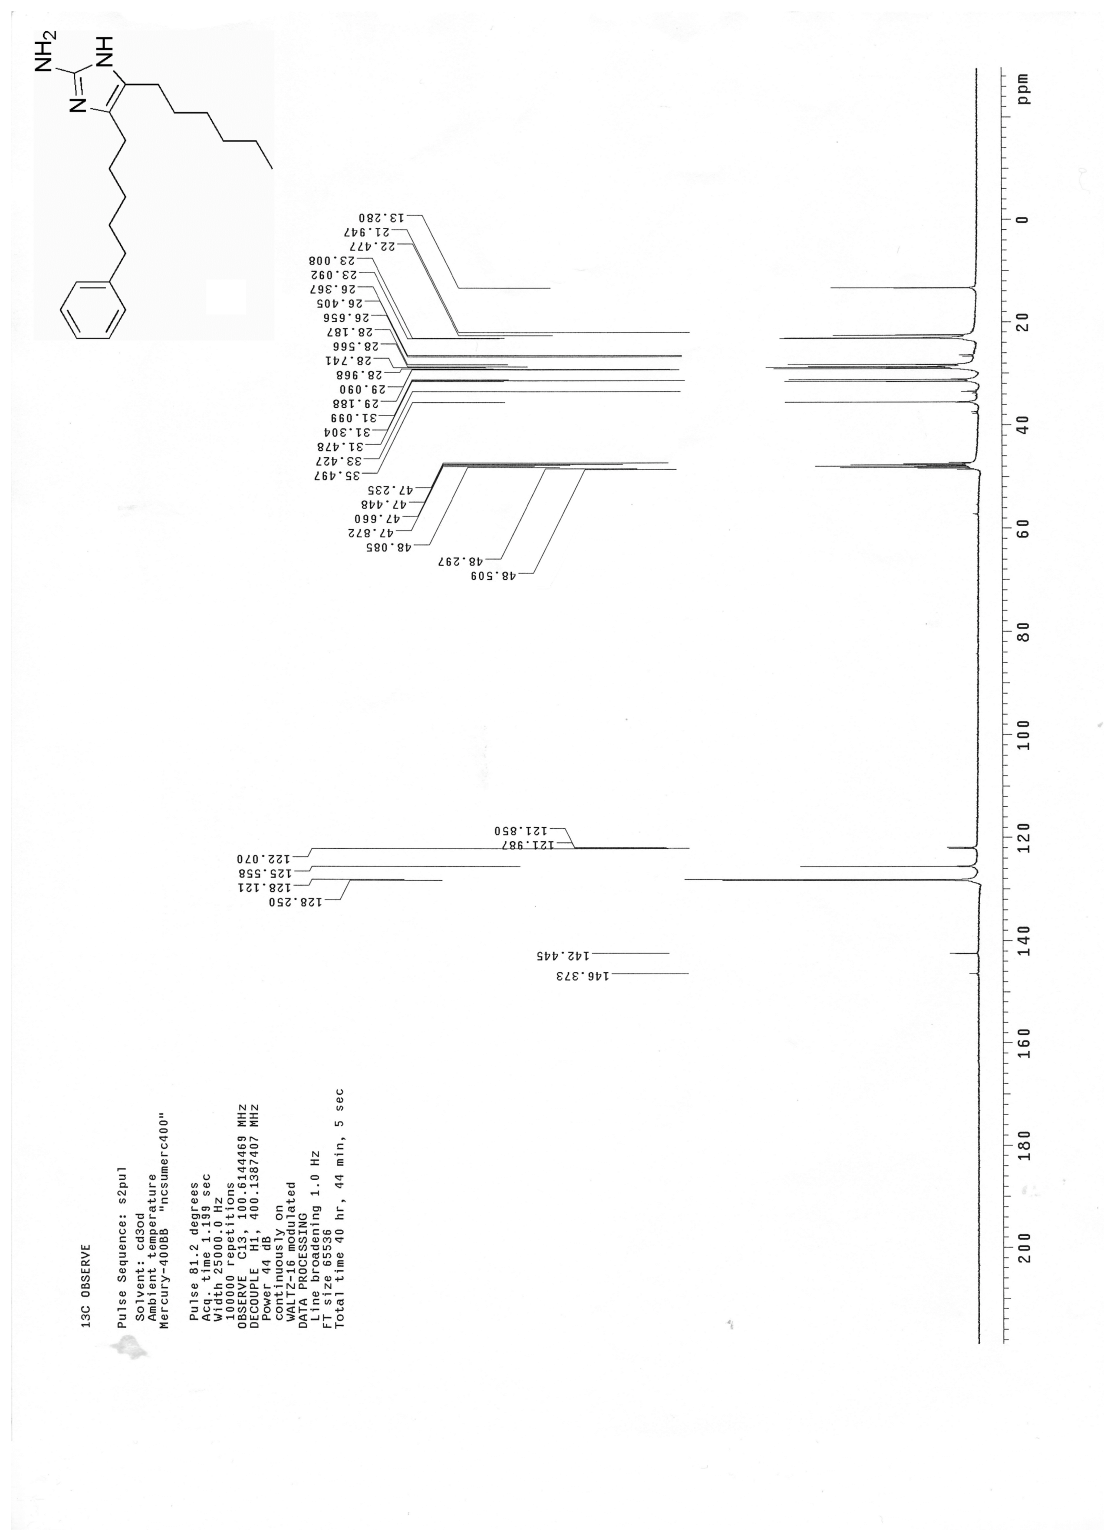

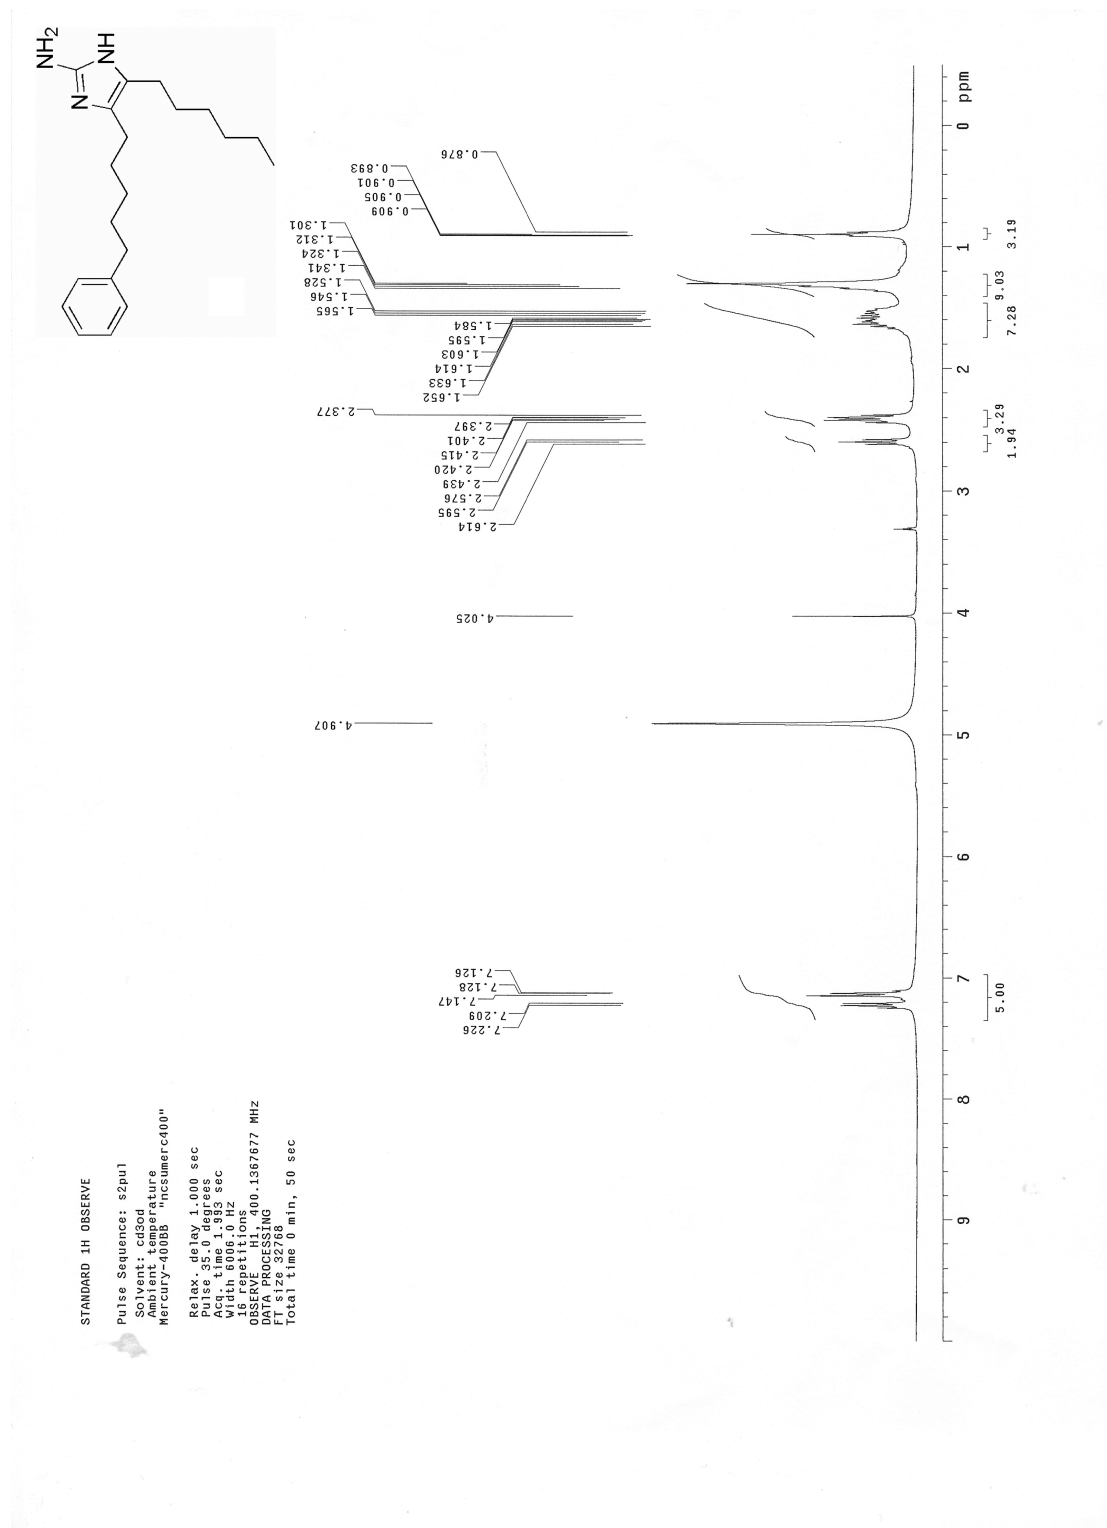

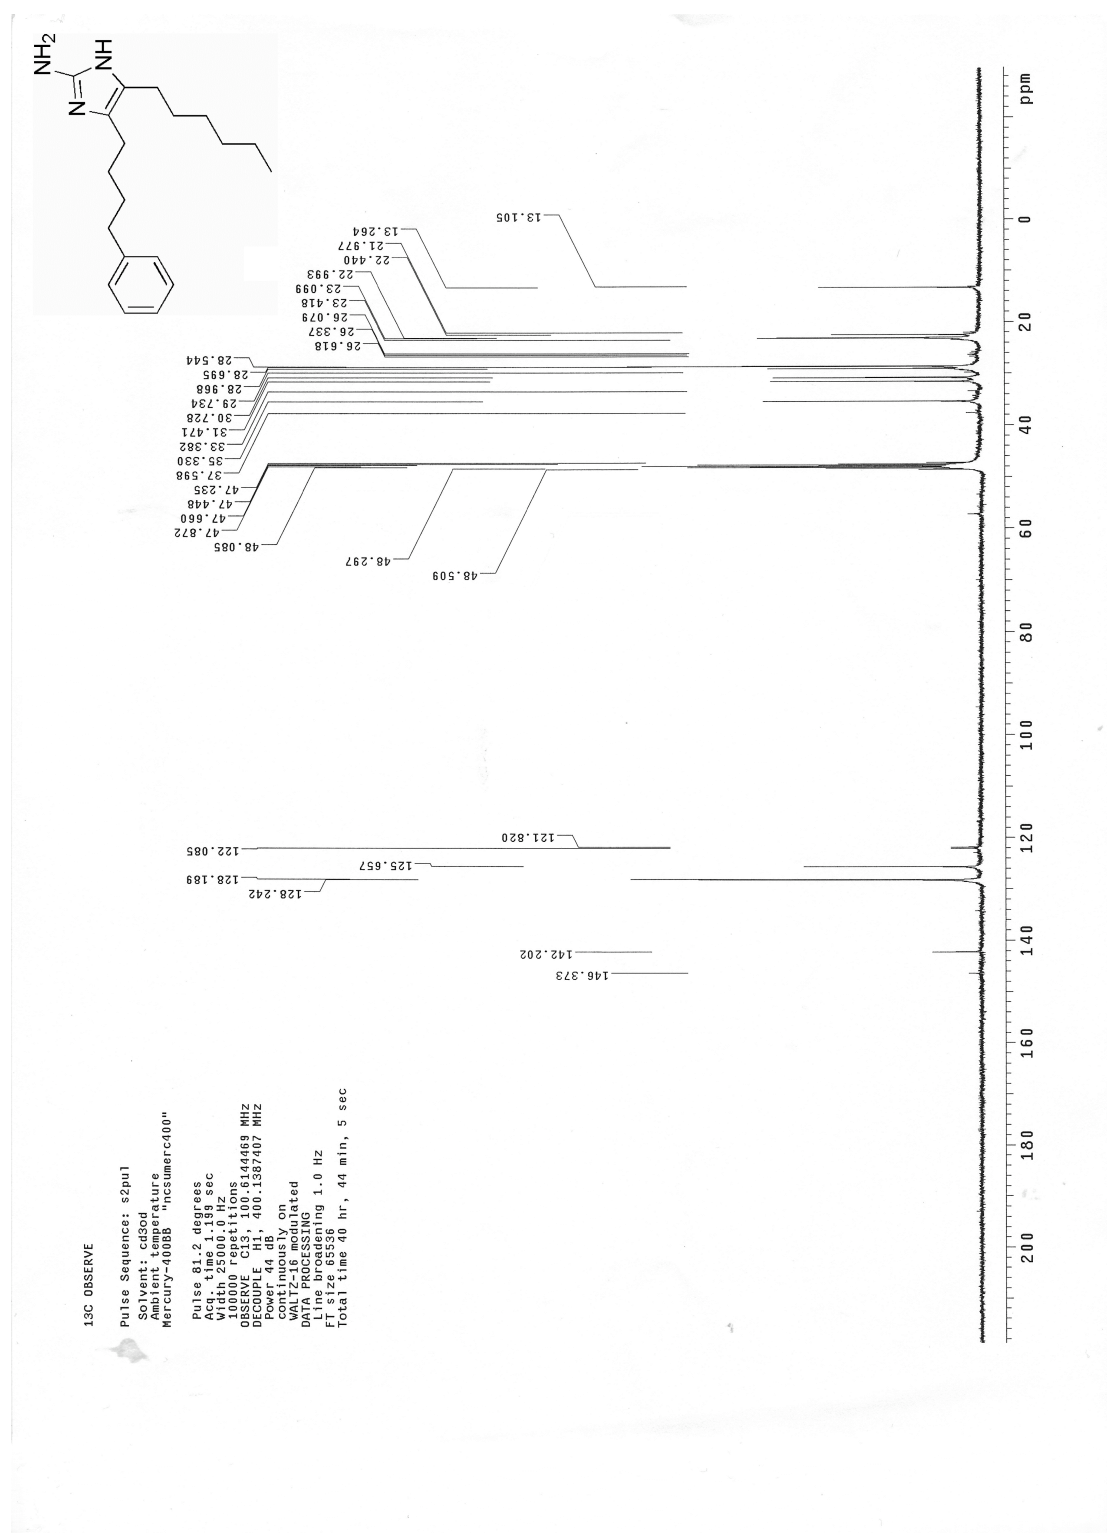

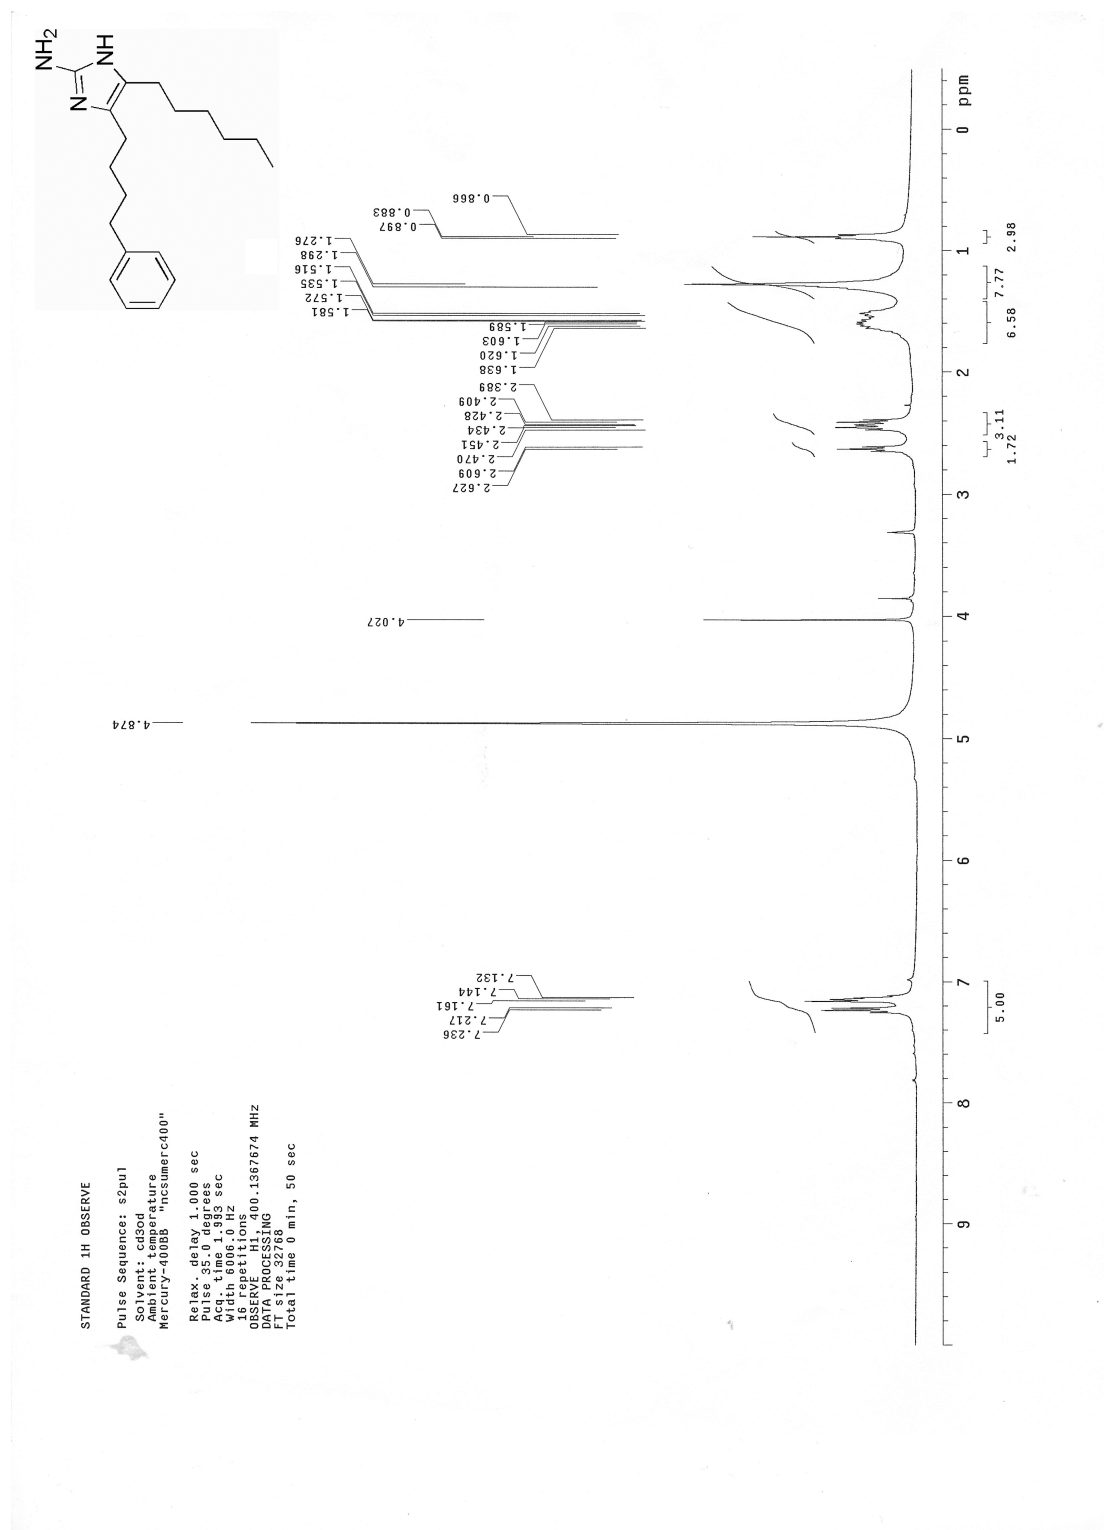

# NMR data for $\alpha$ -nitro ketones

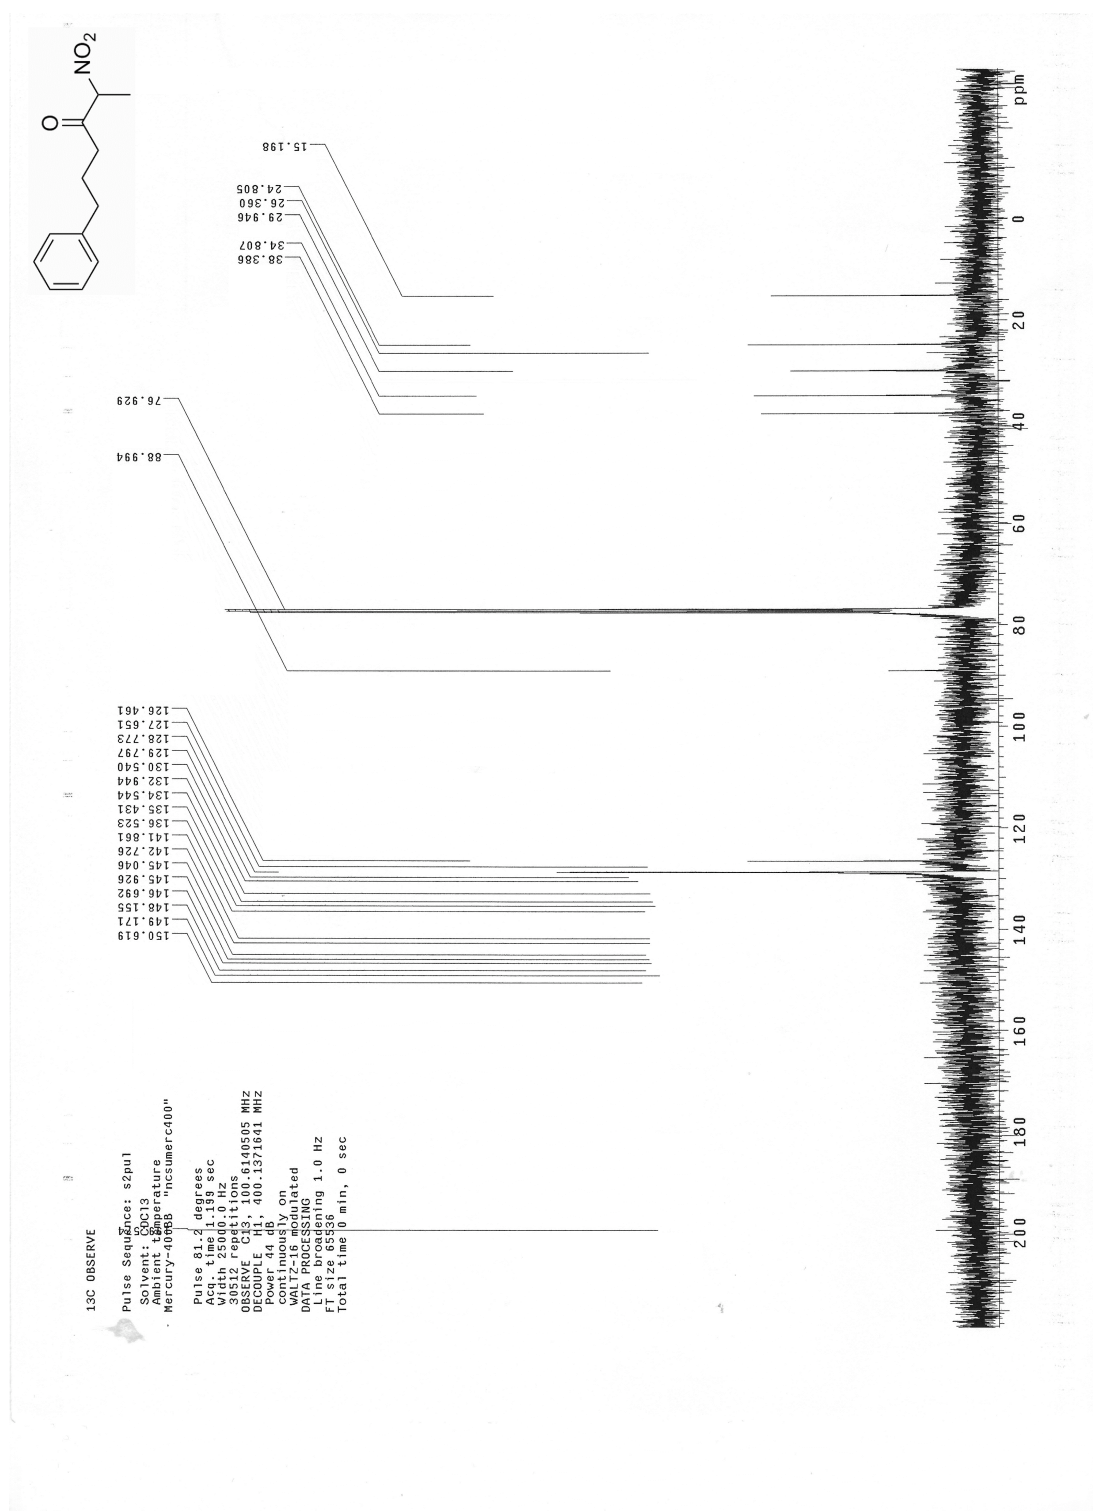



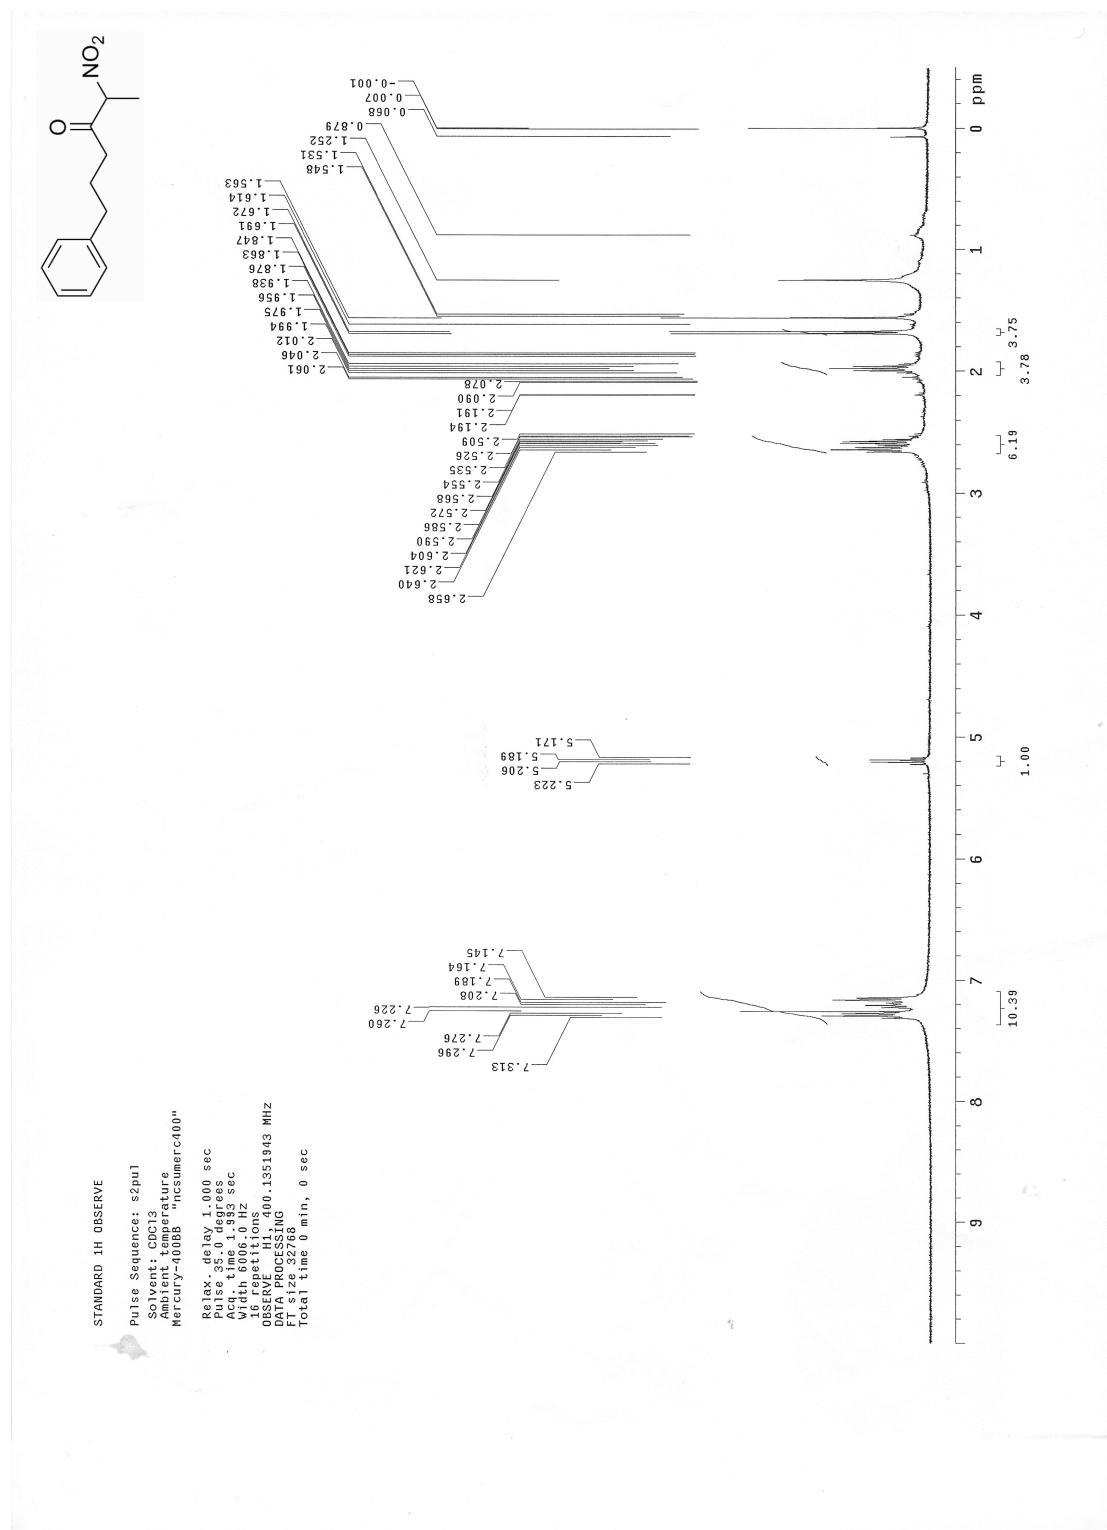

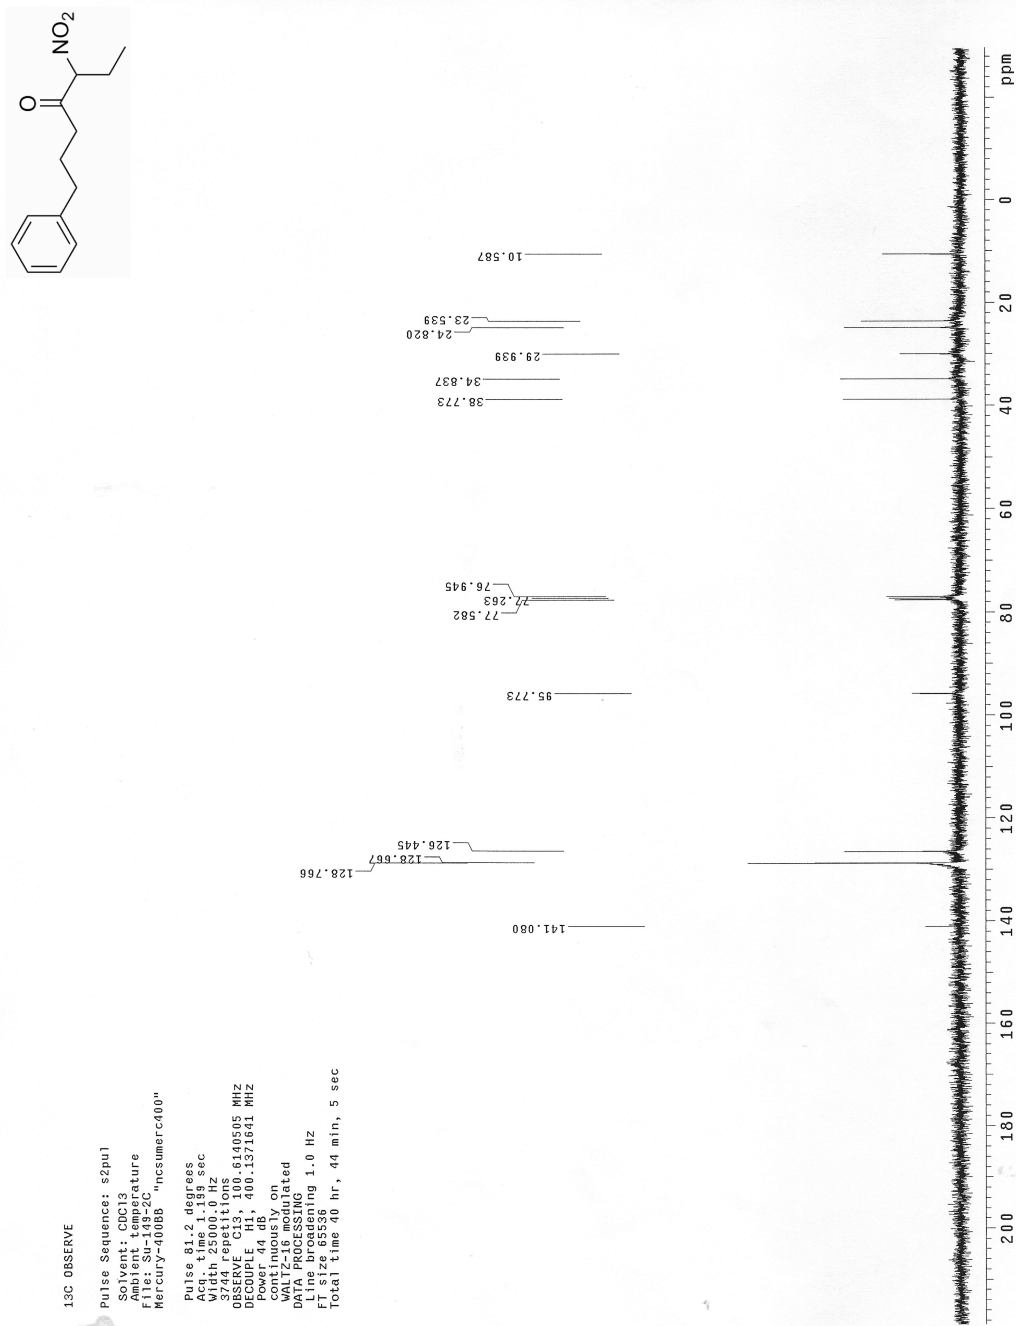

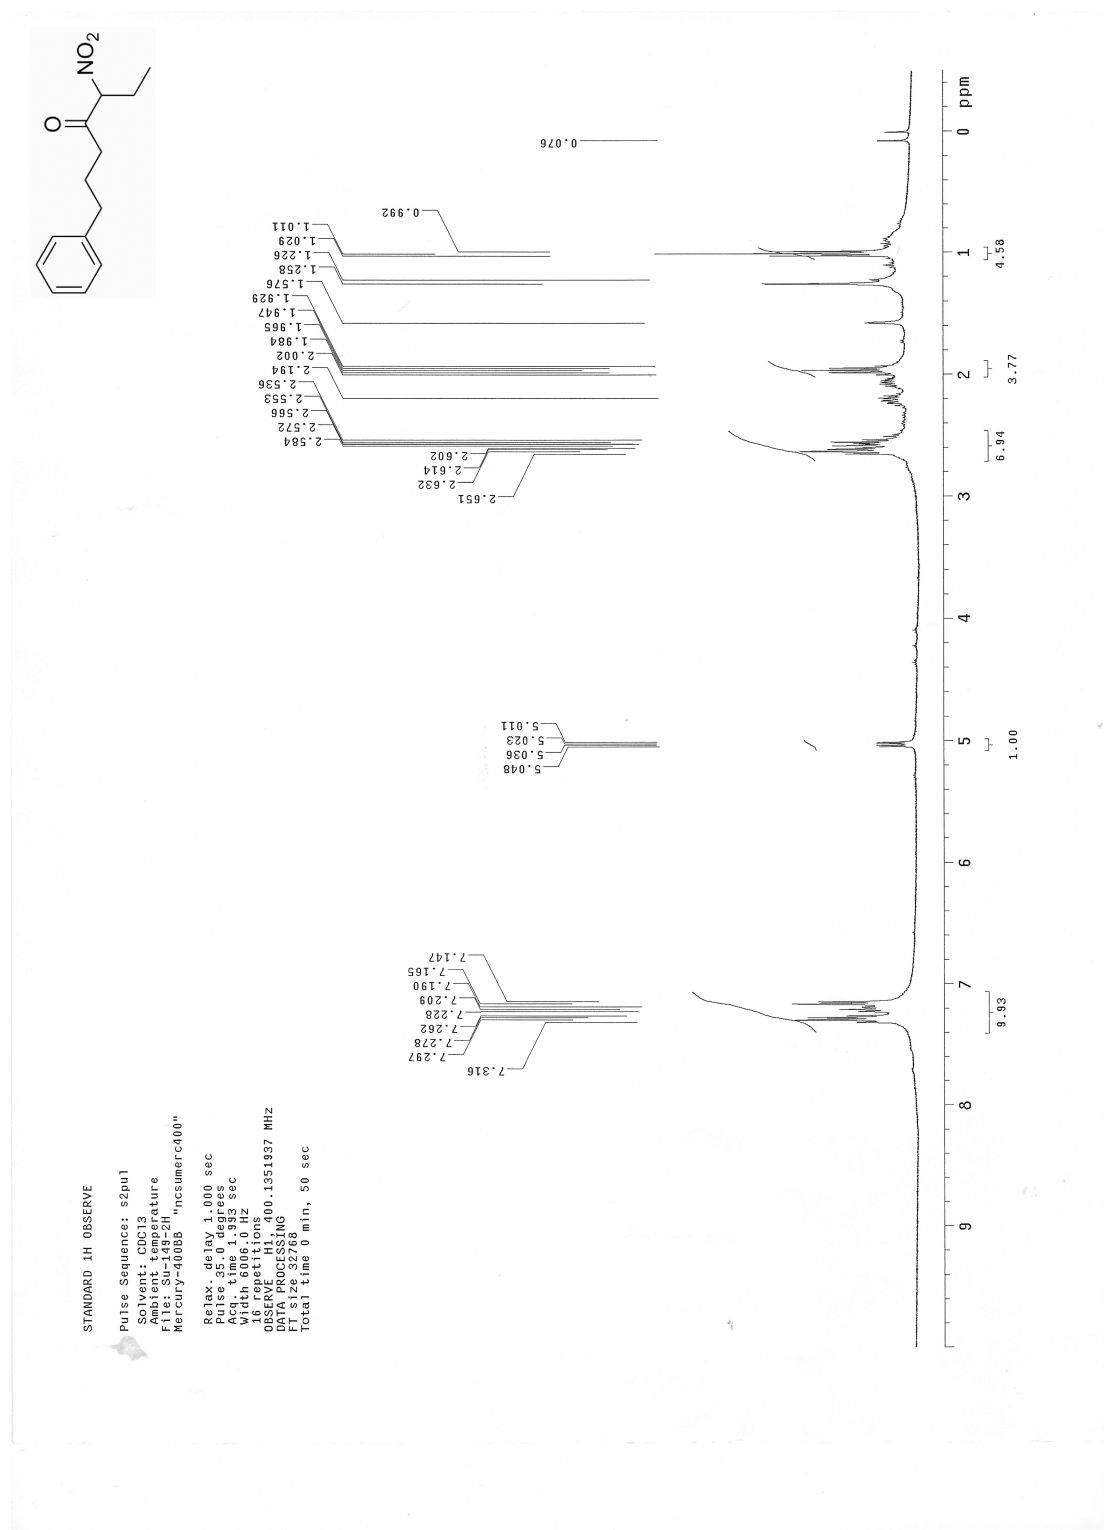



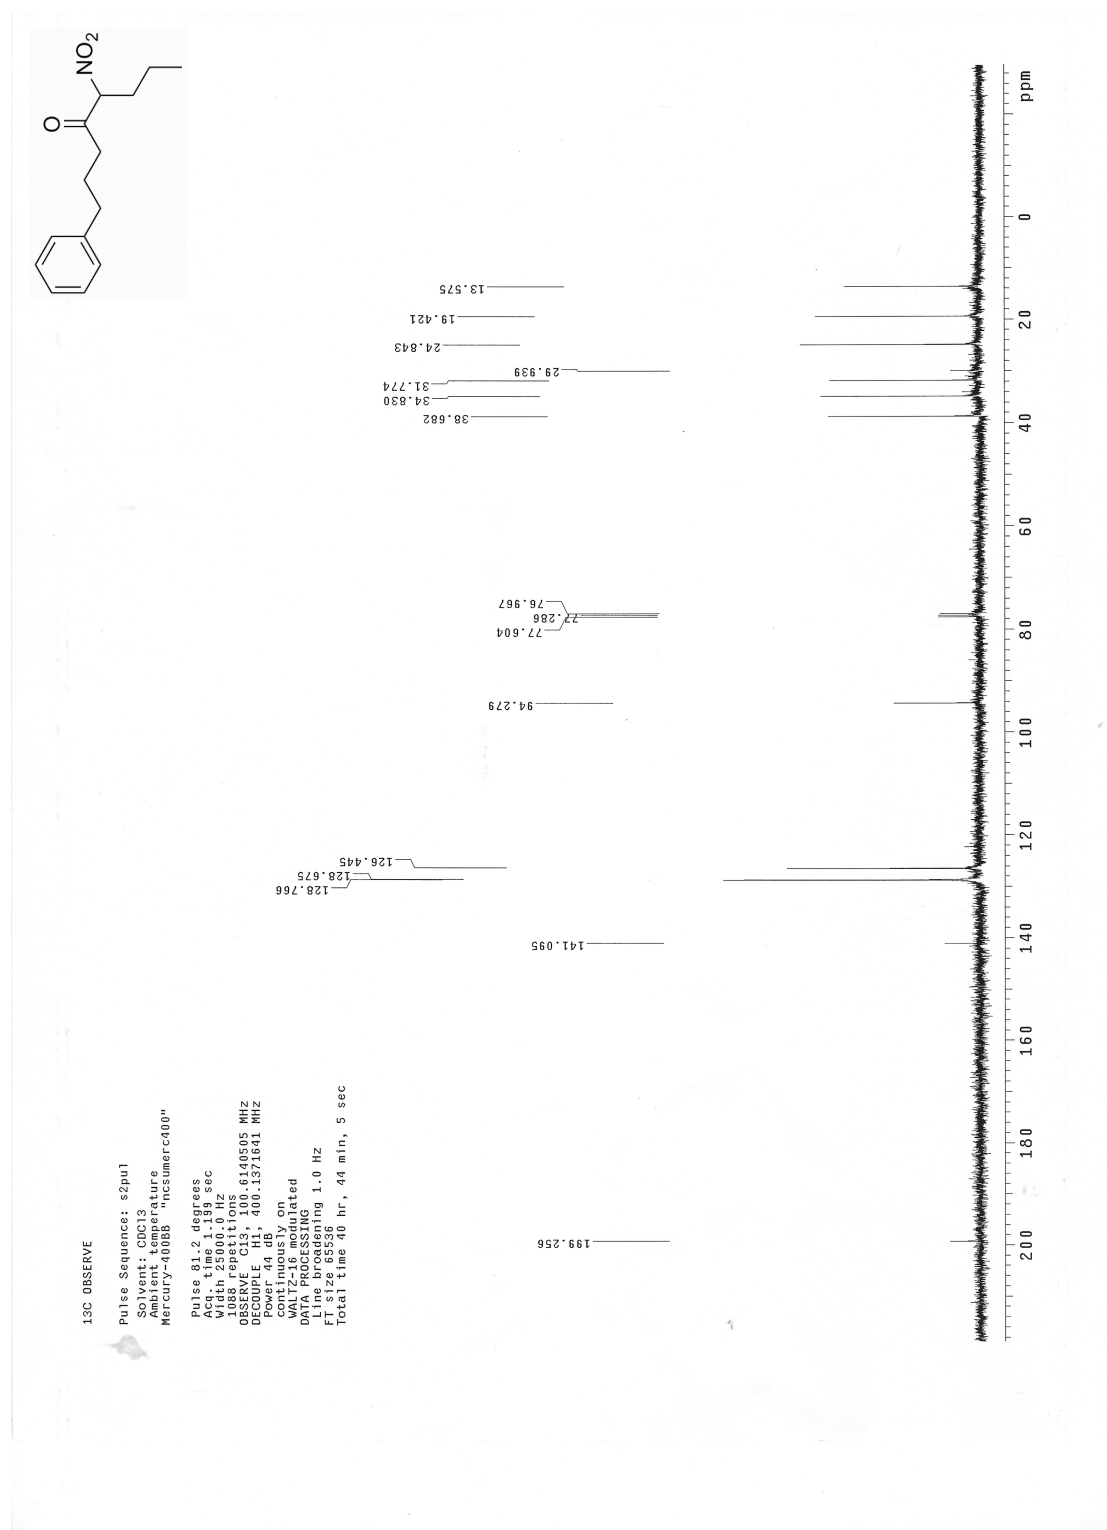

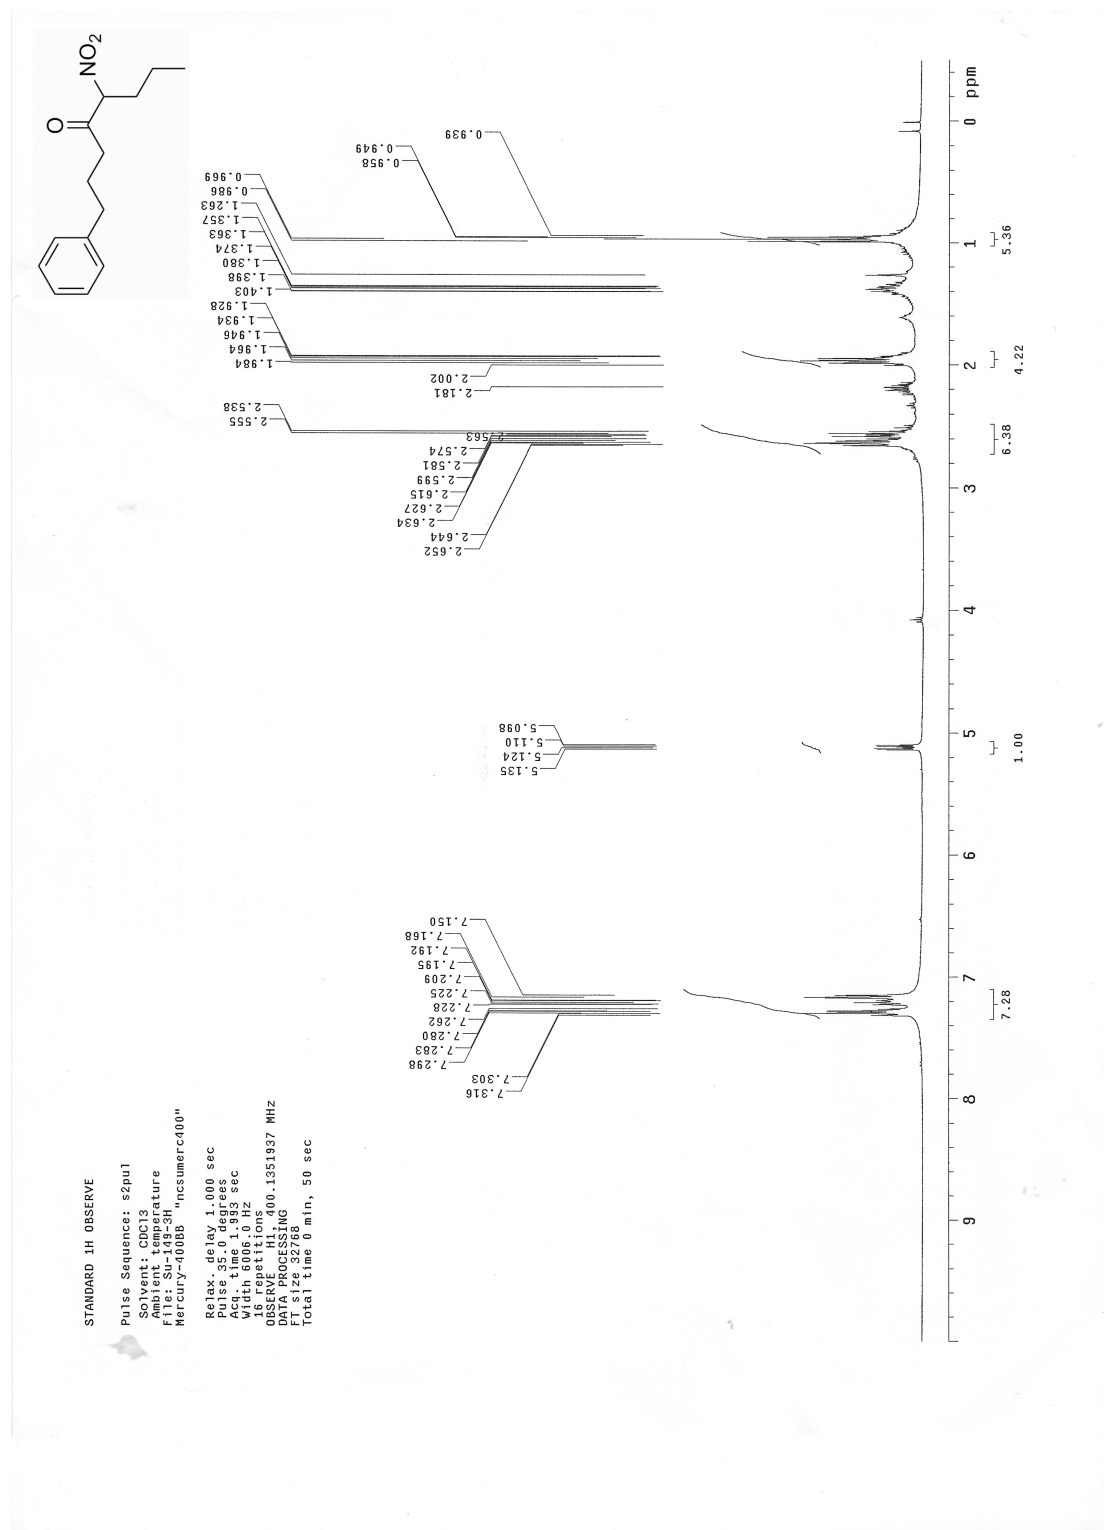

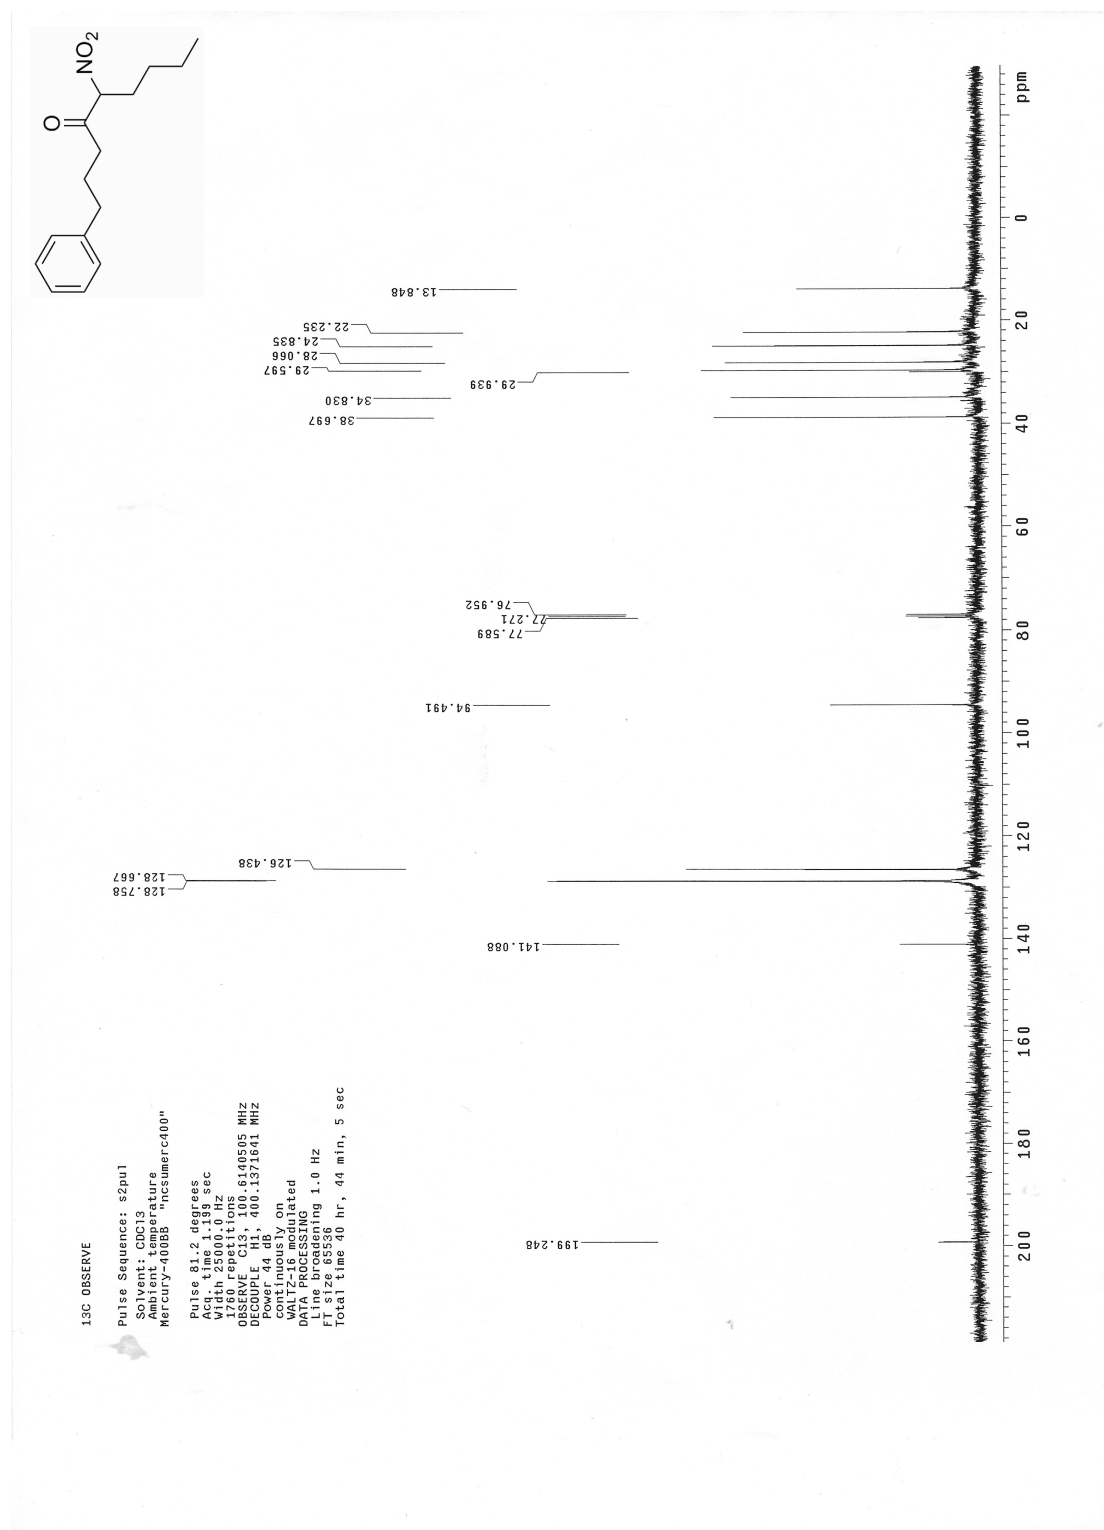

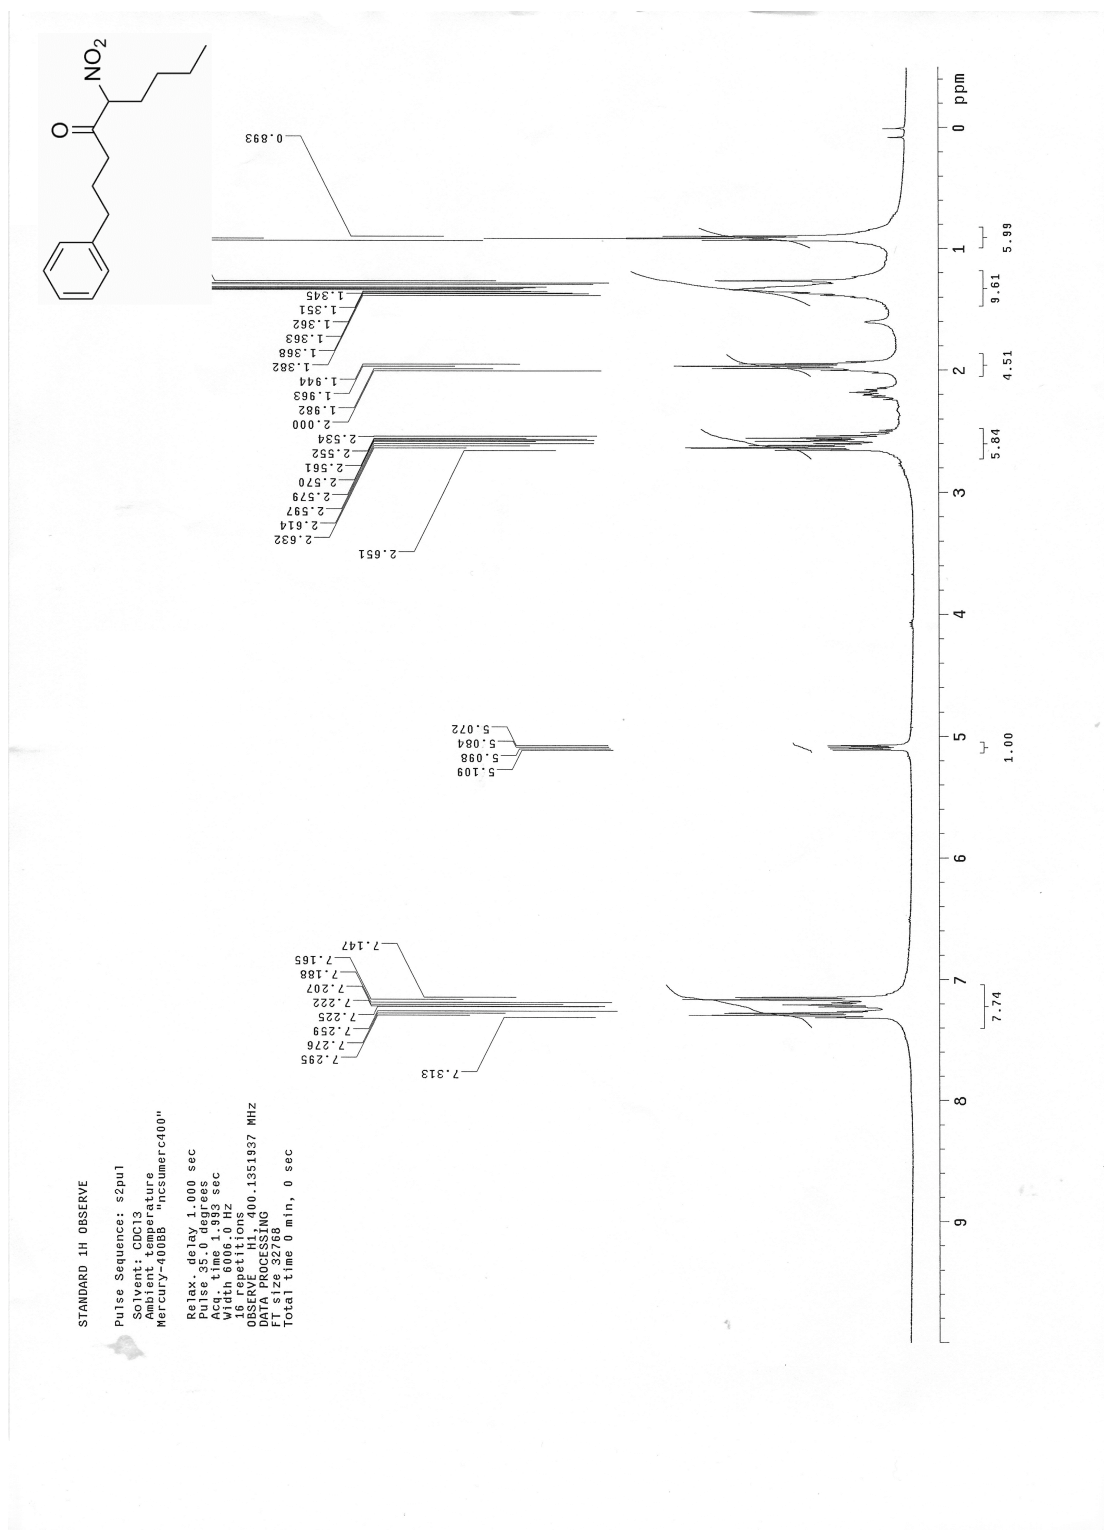

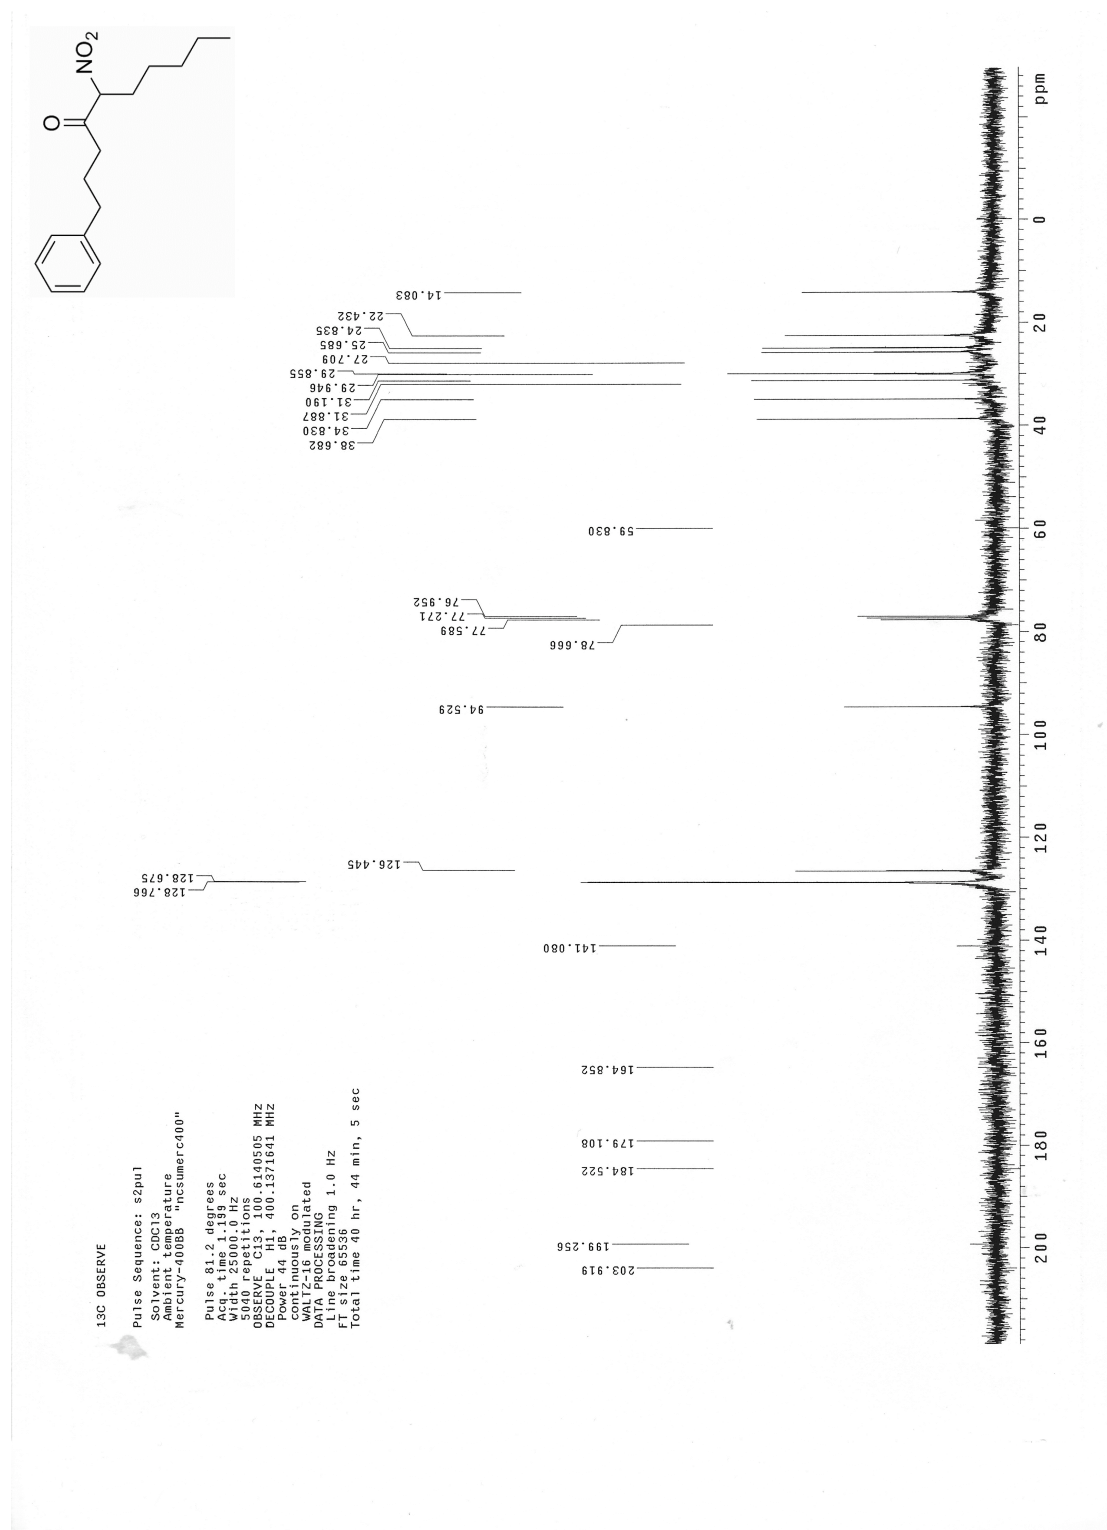

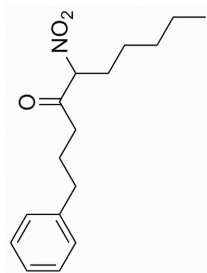

STANDARD 1H OBSERVE

Pulse Sequence: s2pul  
Solvent: CDCl3  
Acq. temperature: 300.2 K  
Mercury-3000B "ncsmerc300"  
Relax. delay 1.000 sec  
Pulse 36.0 degrees  
Acq. time 1.935 sec  
Wait time 0.000 sec  
16 repetitions  
OBSERVE H1, 299.7918101 MHz  
DATA PROCESSING  
Total time 0 min, 49 sec

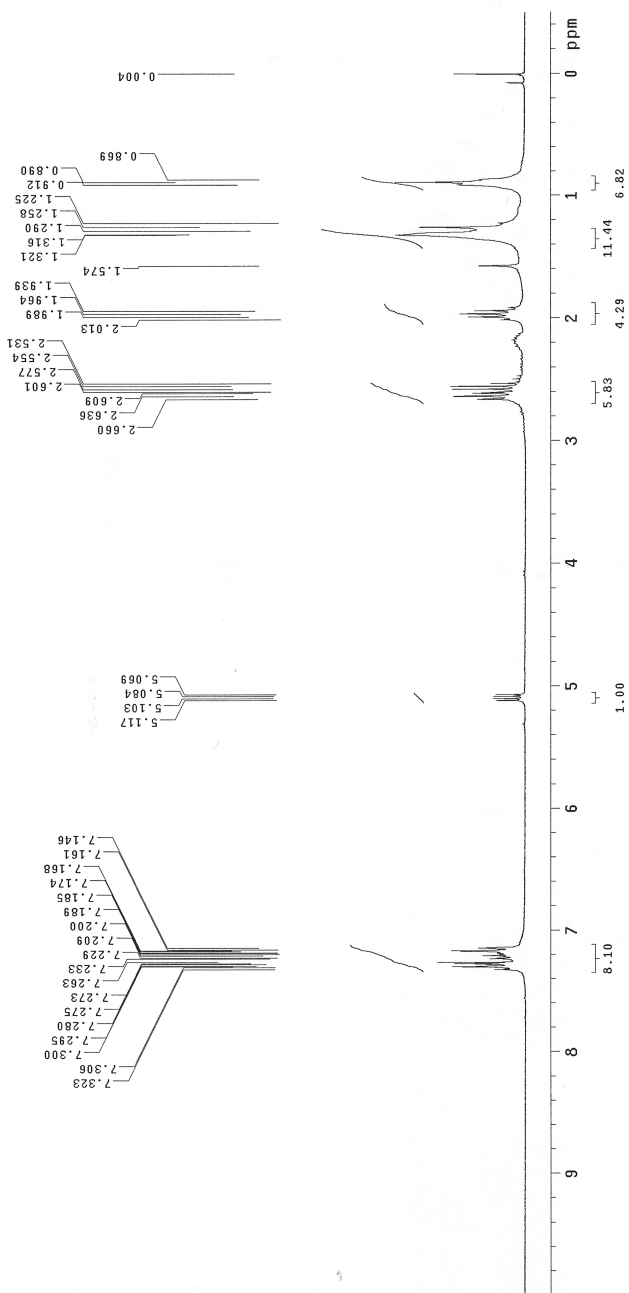



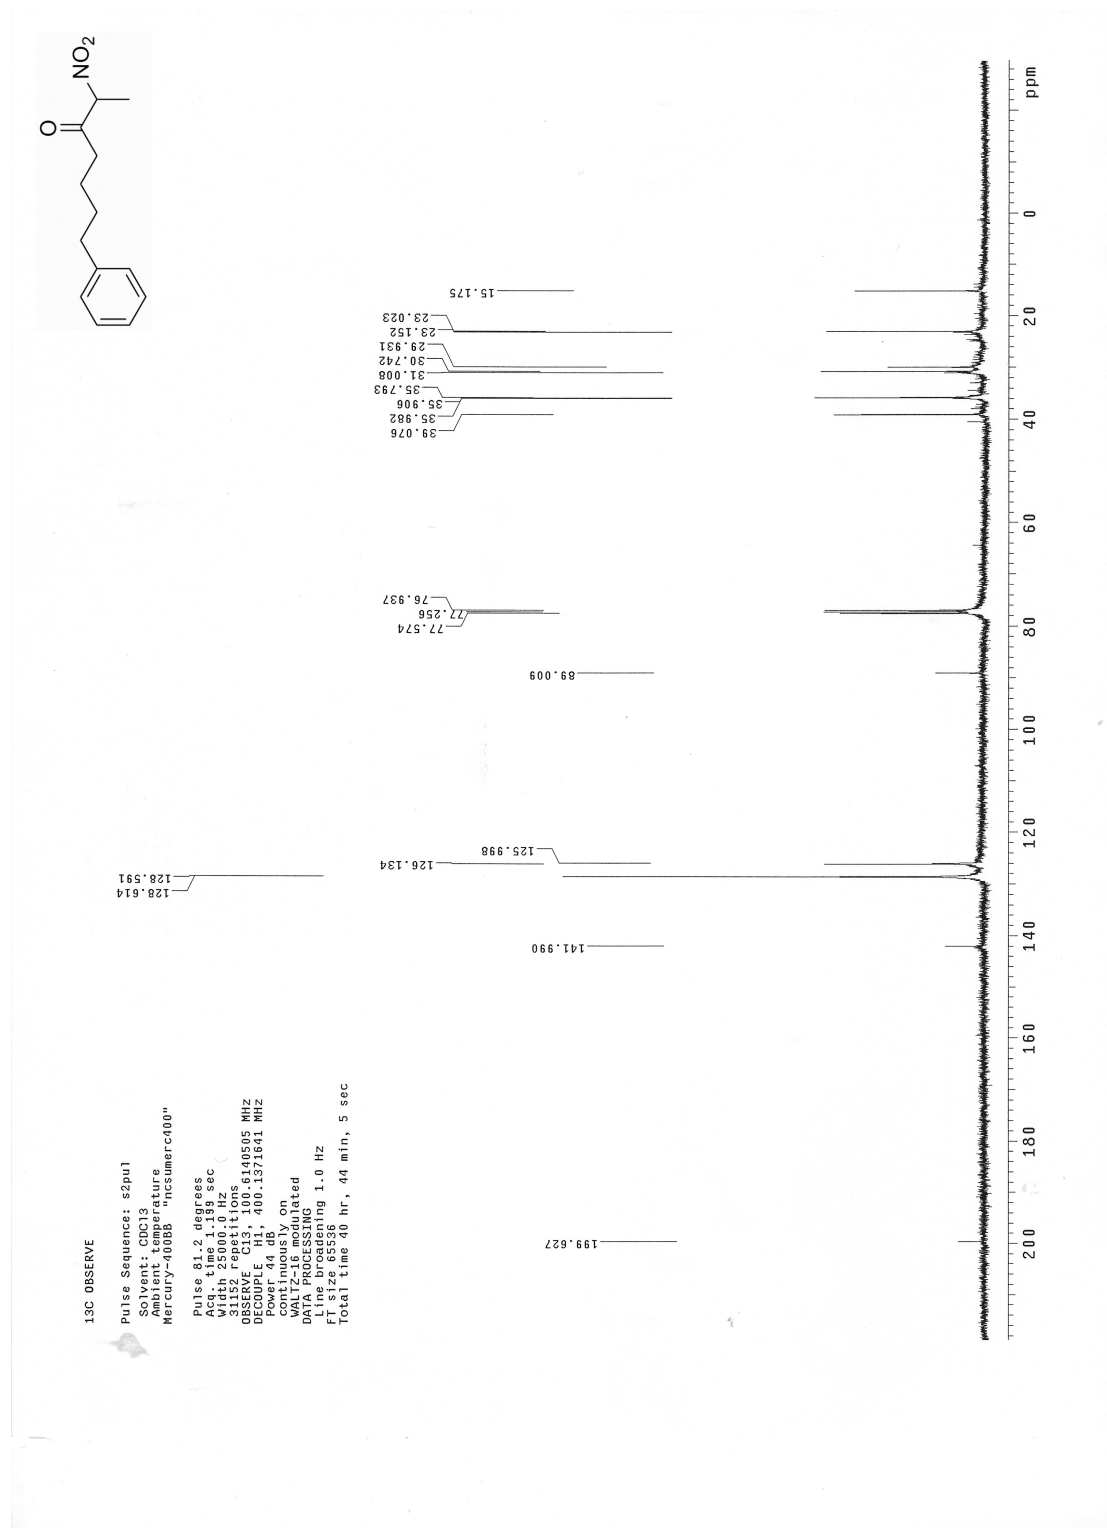

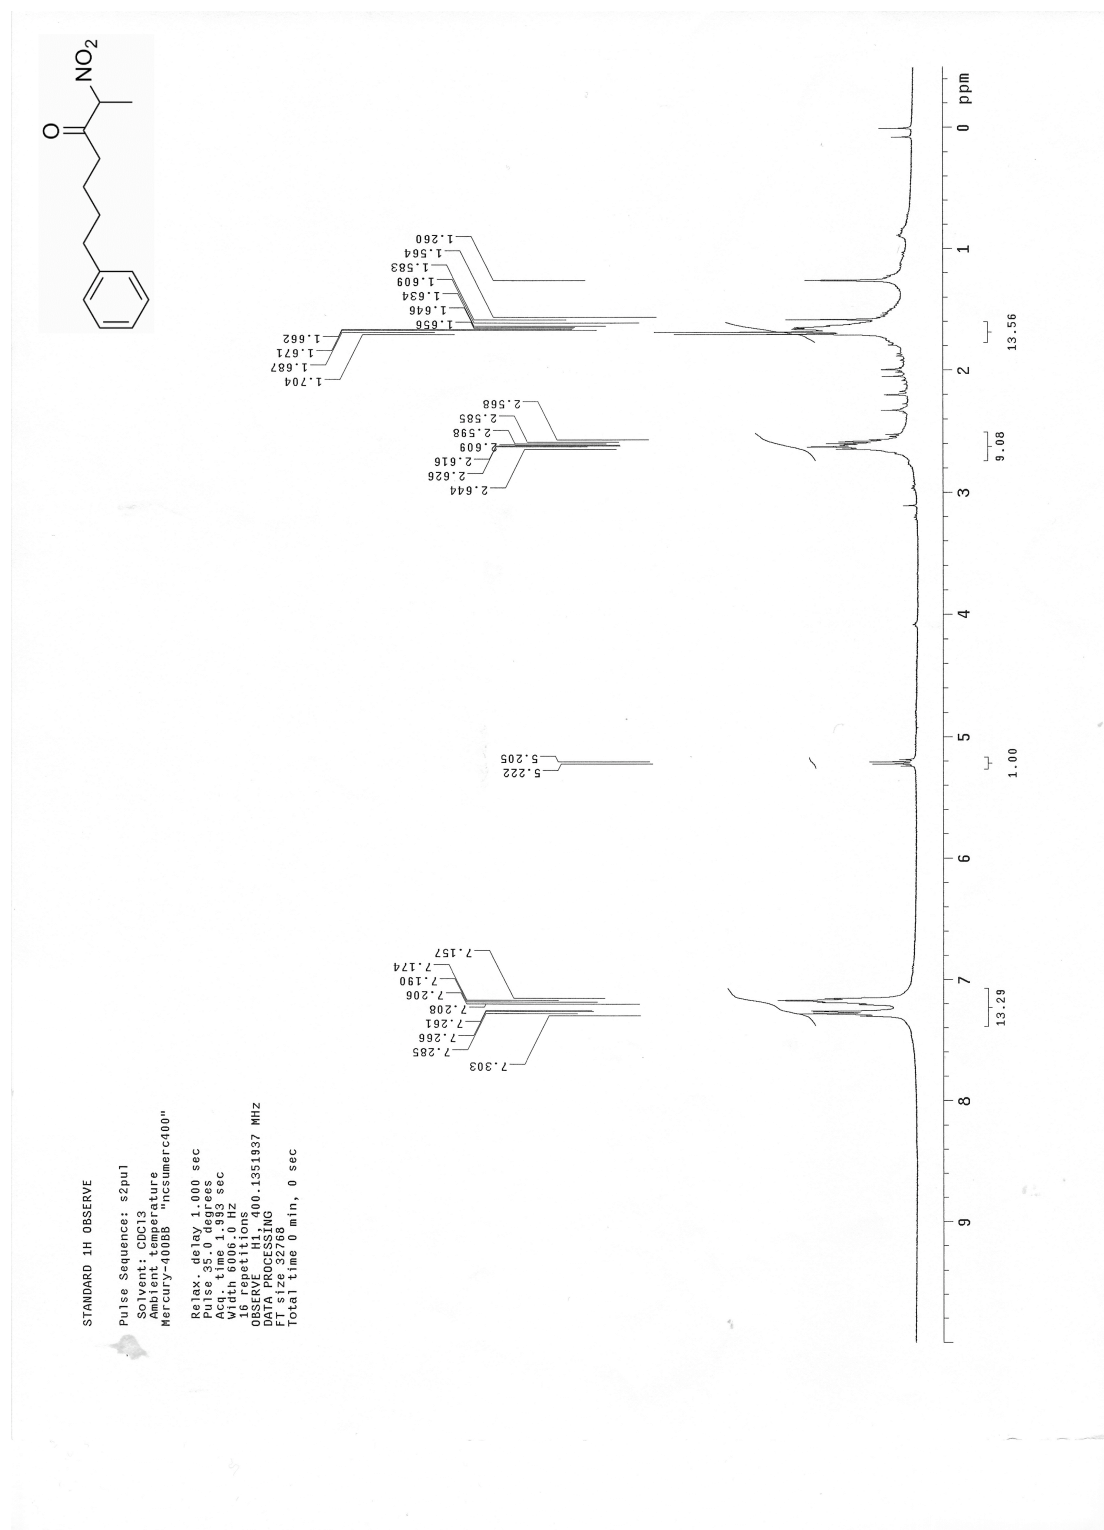



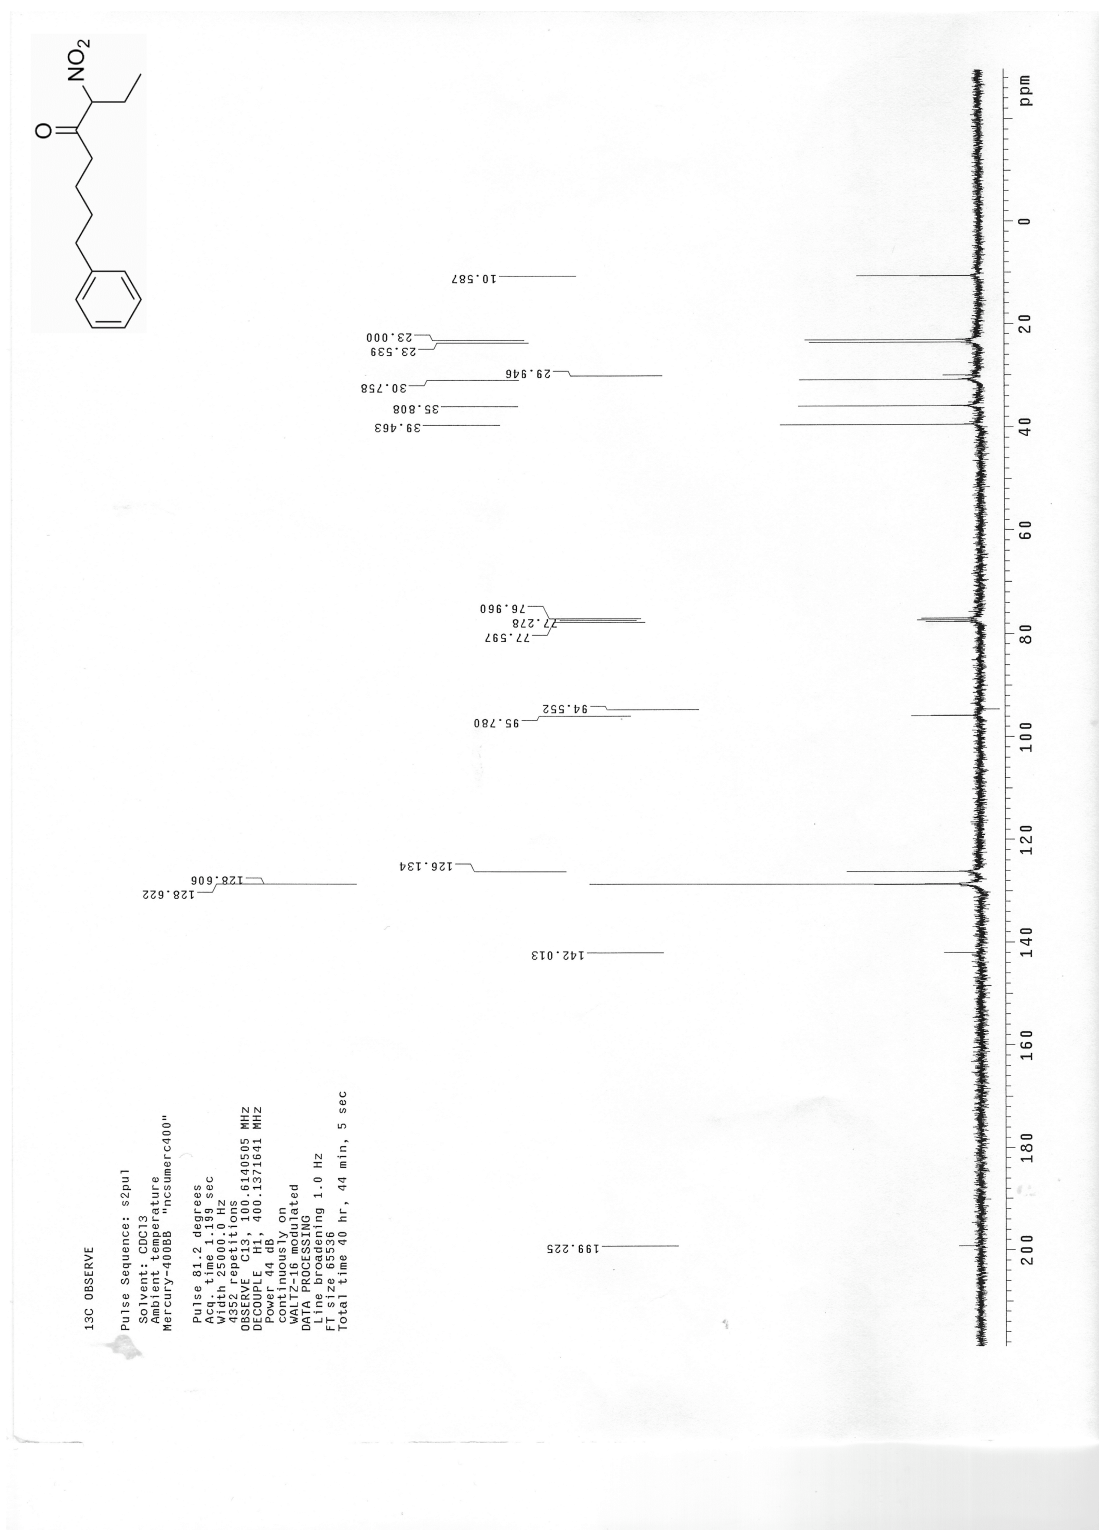

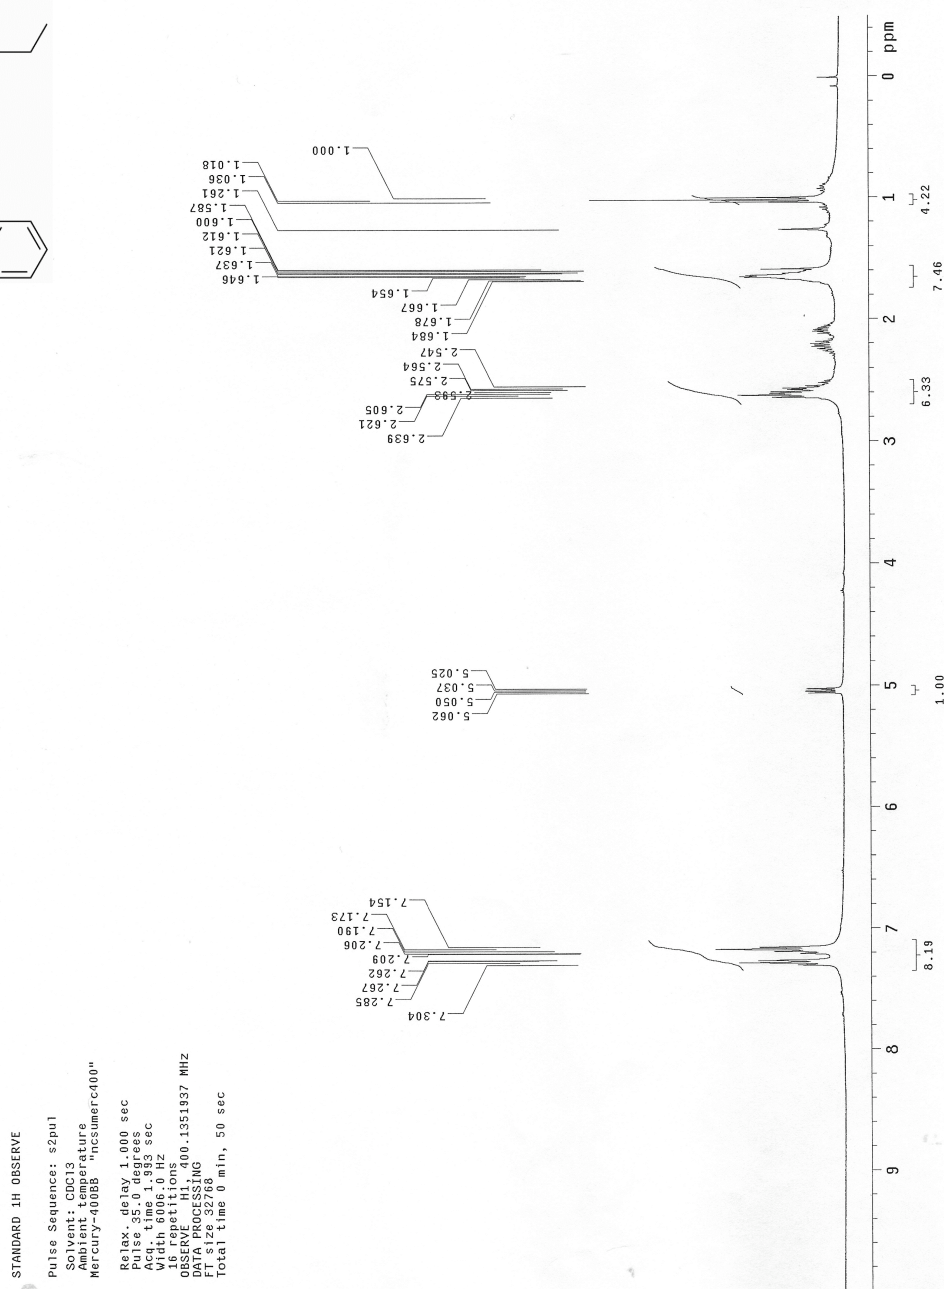

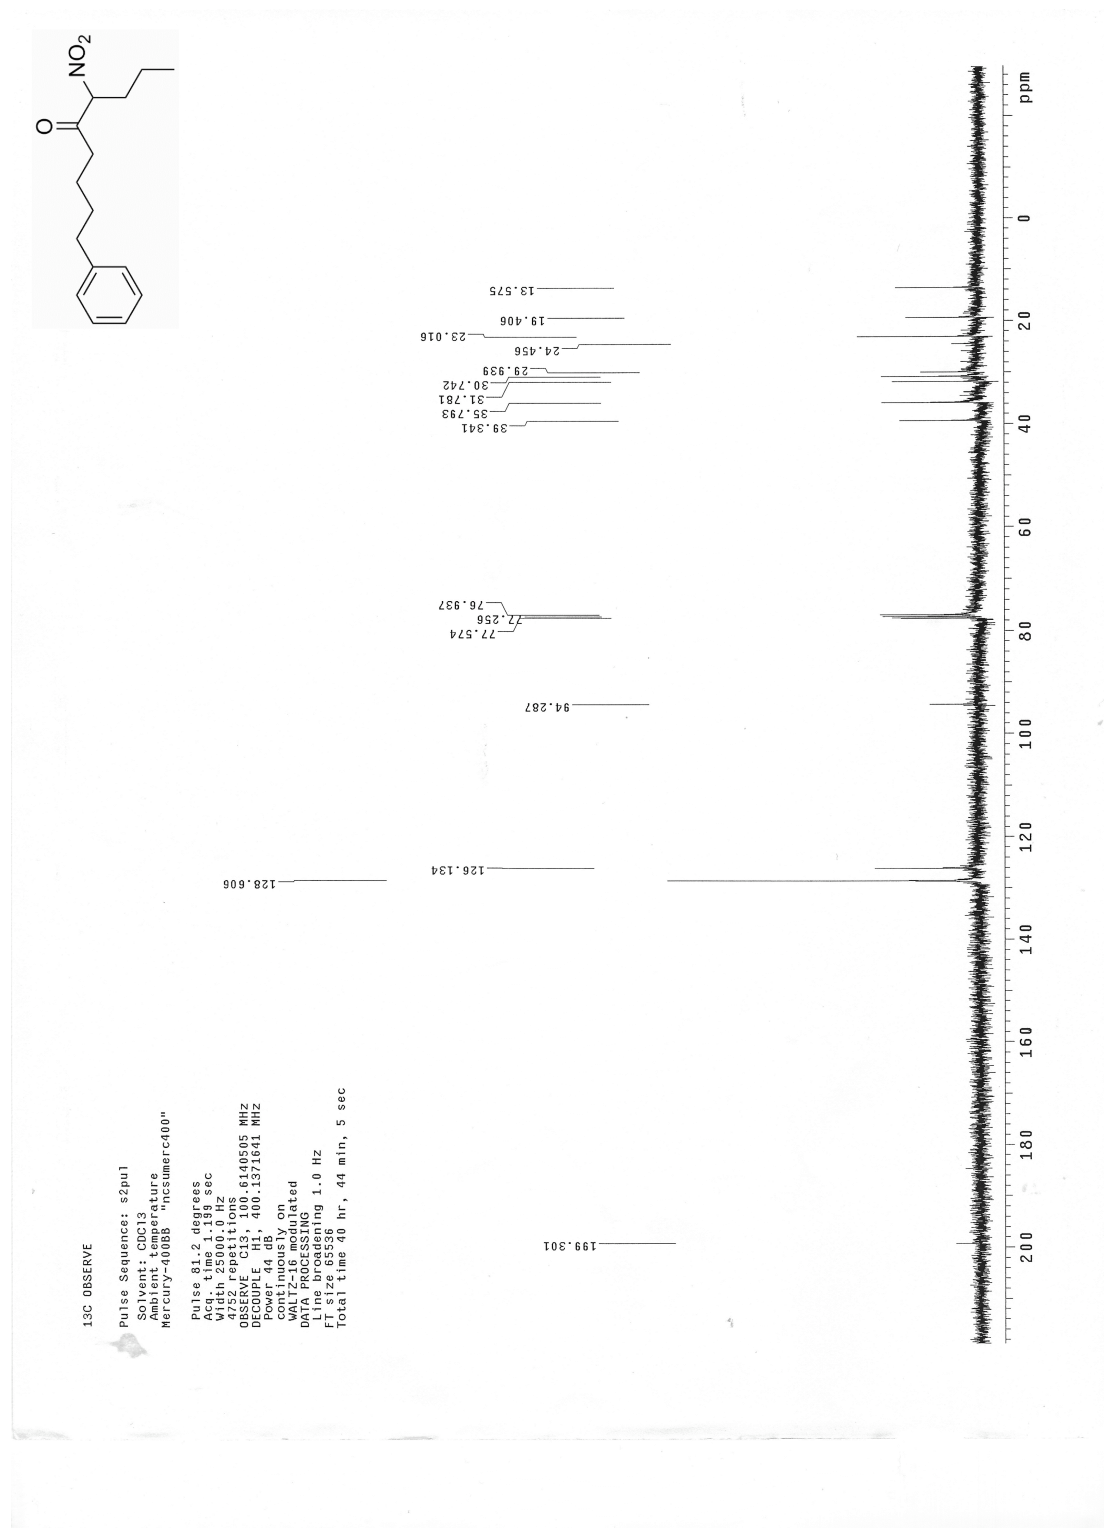

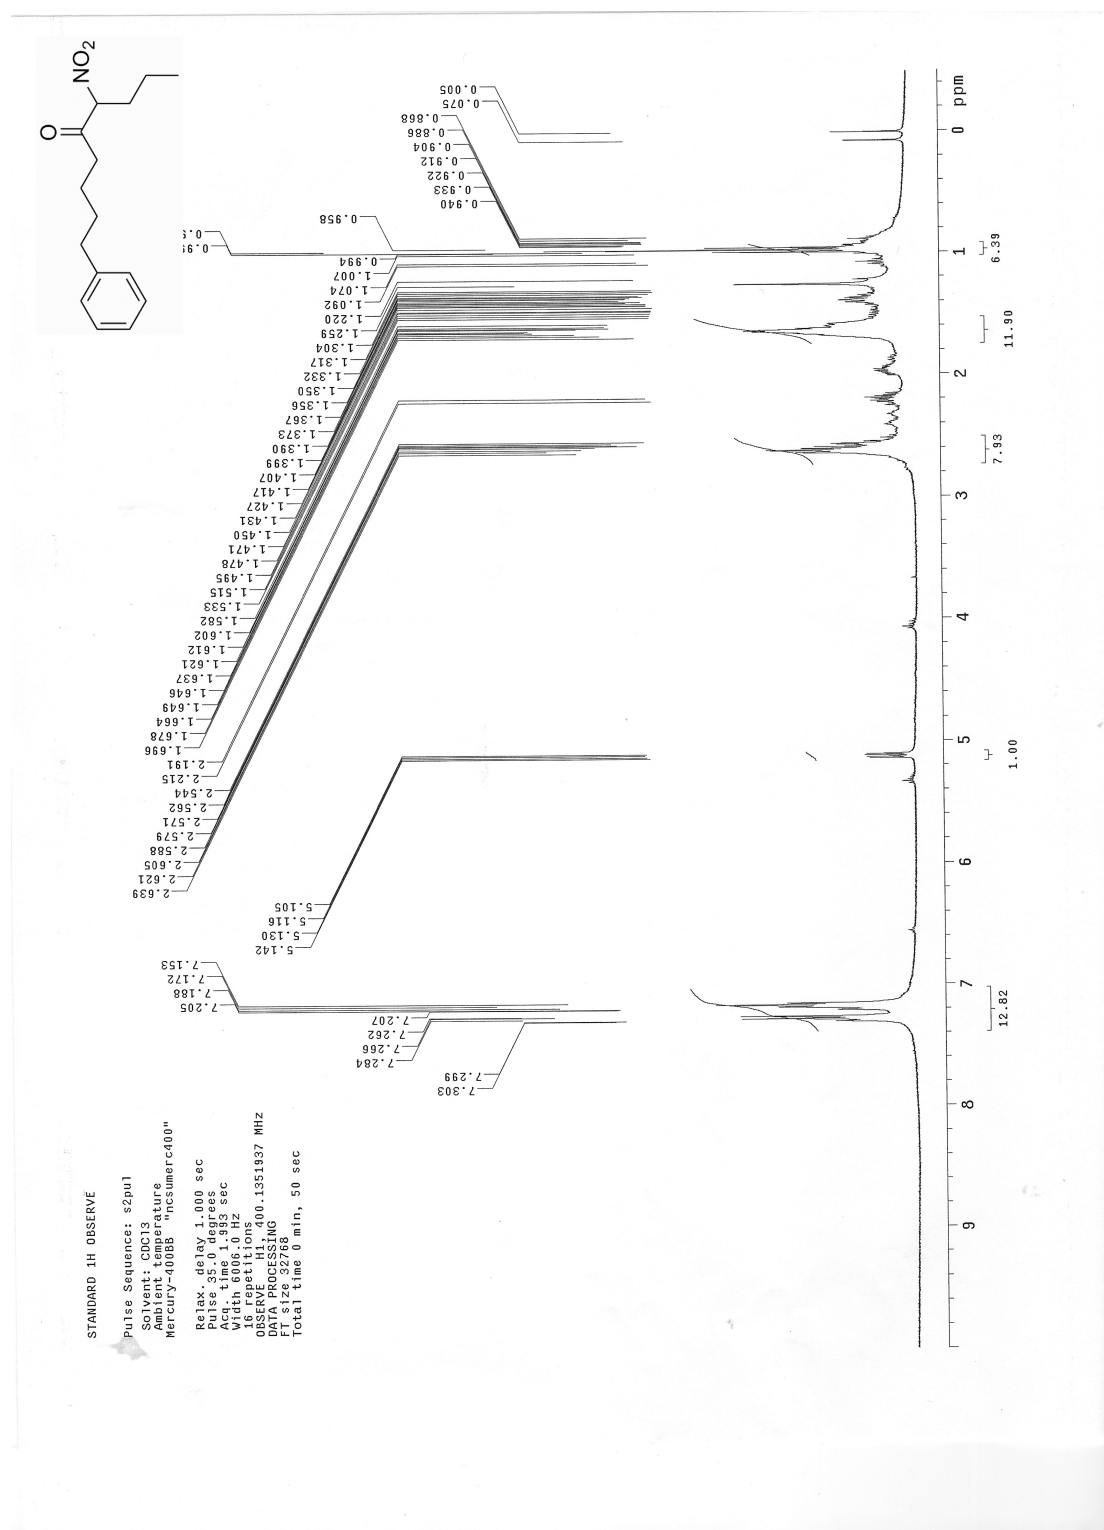



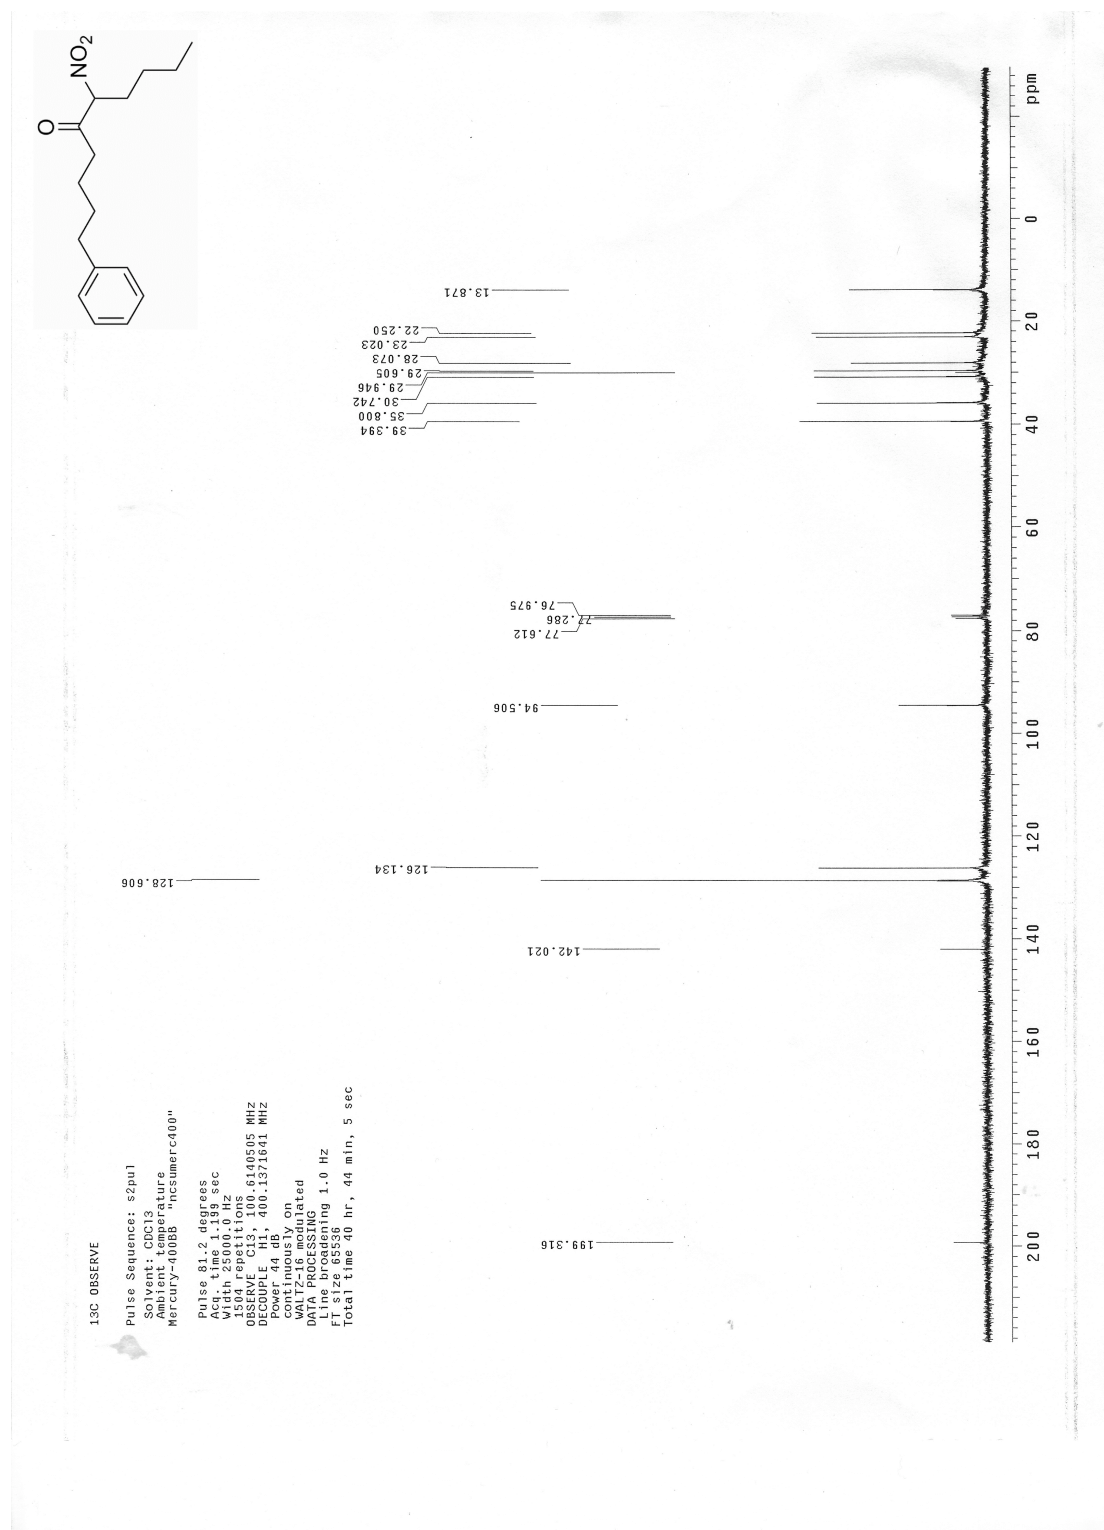

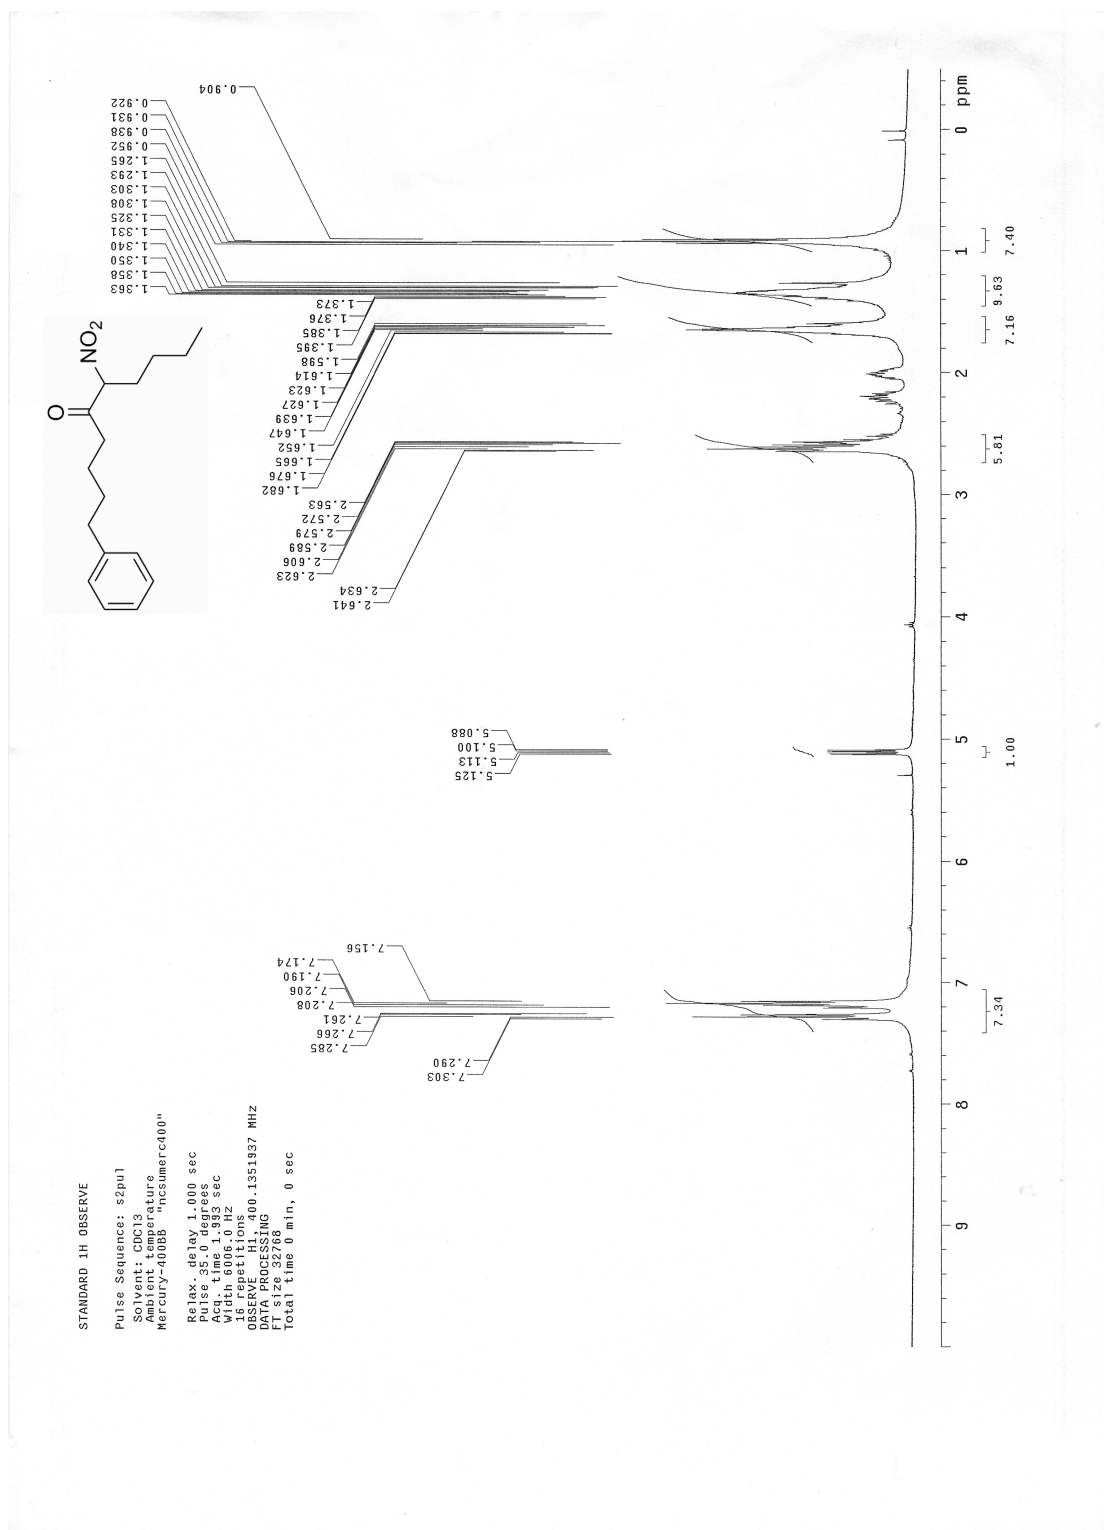

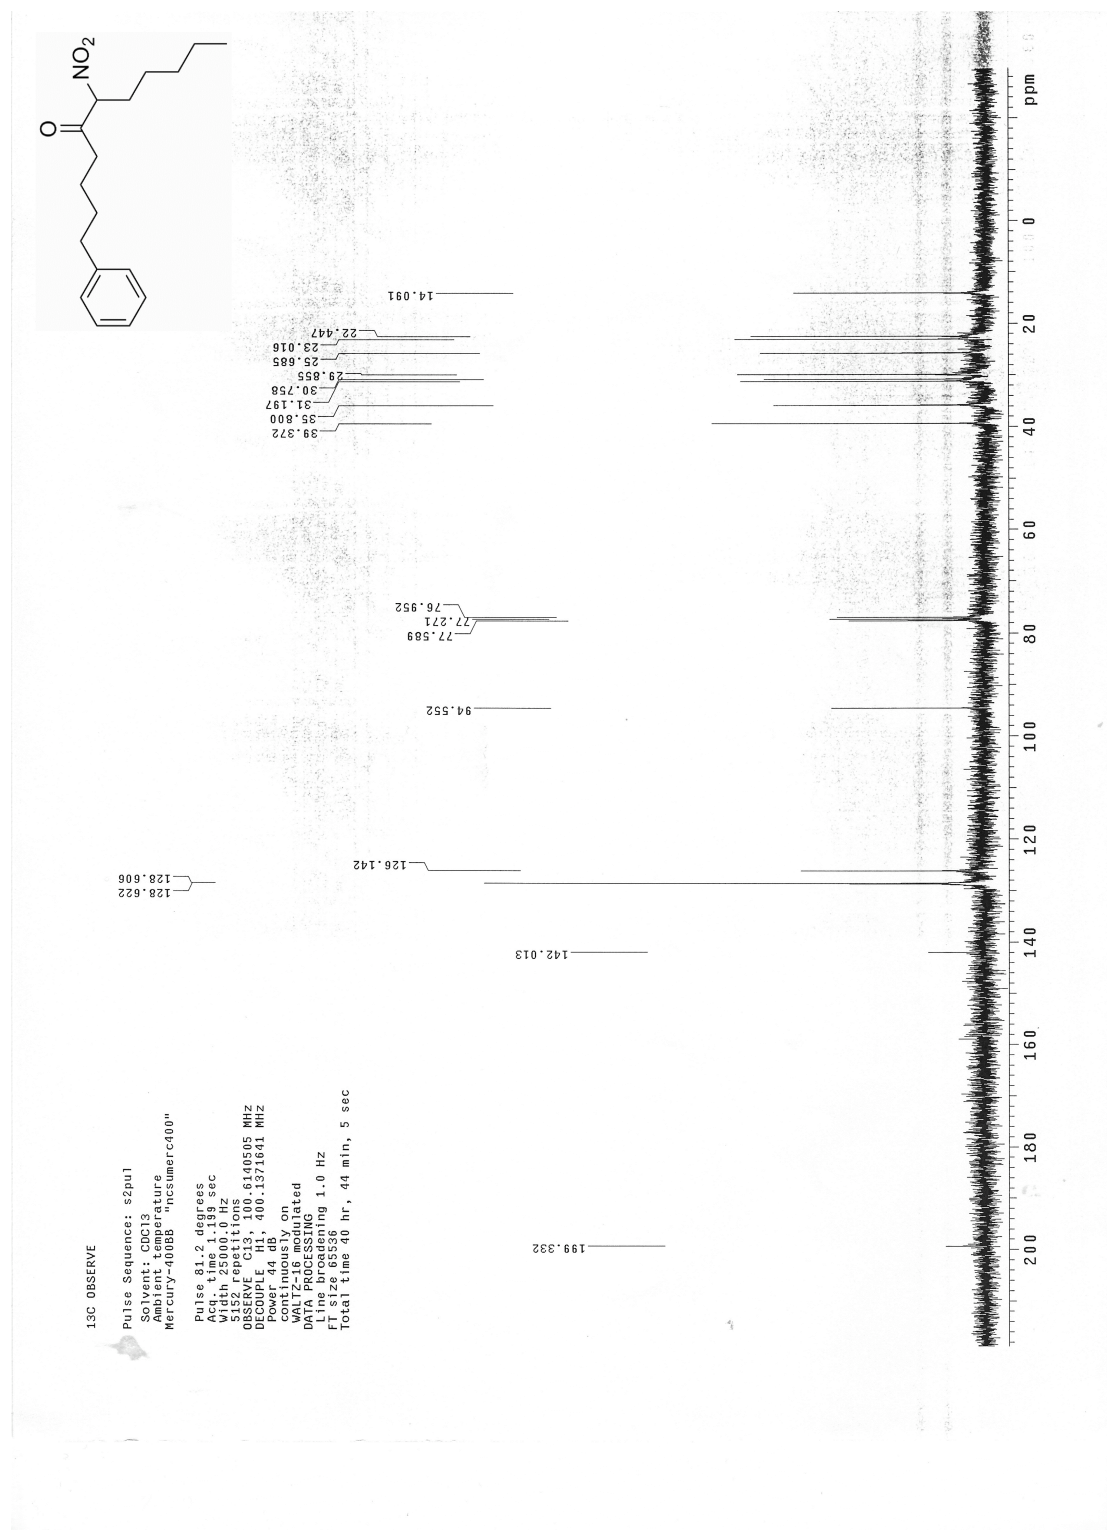



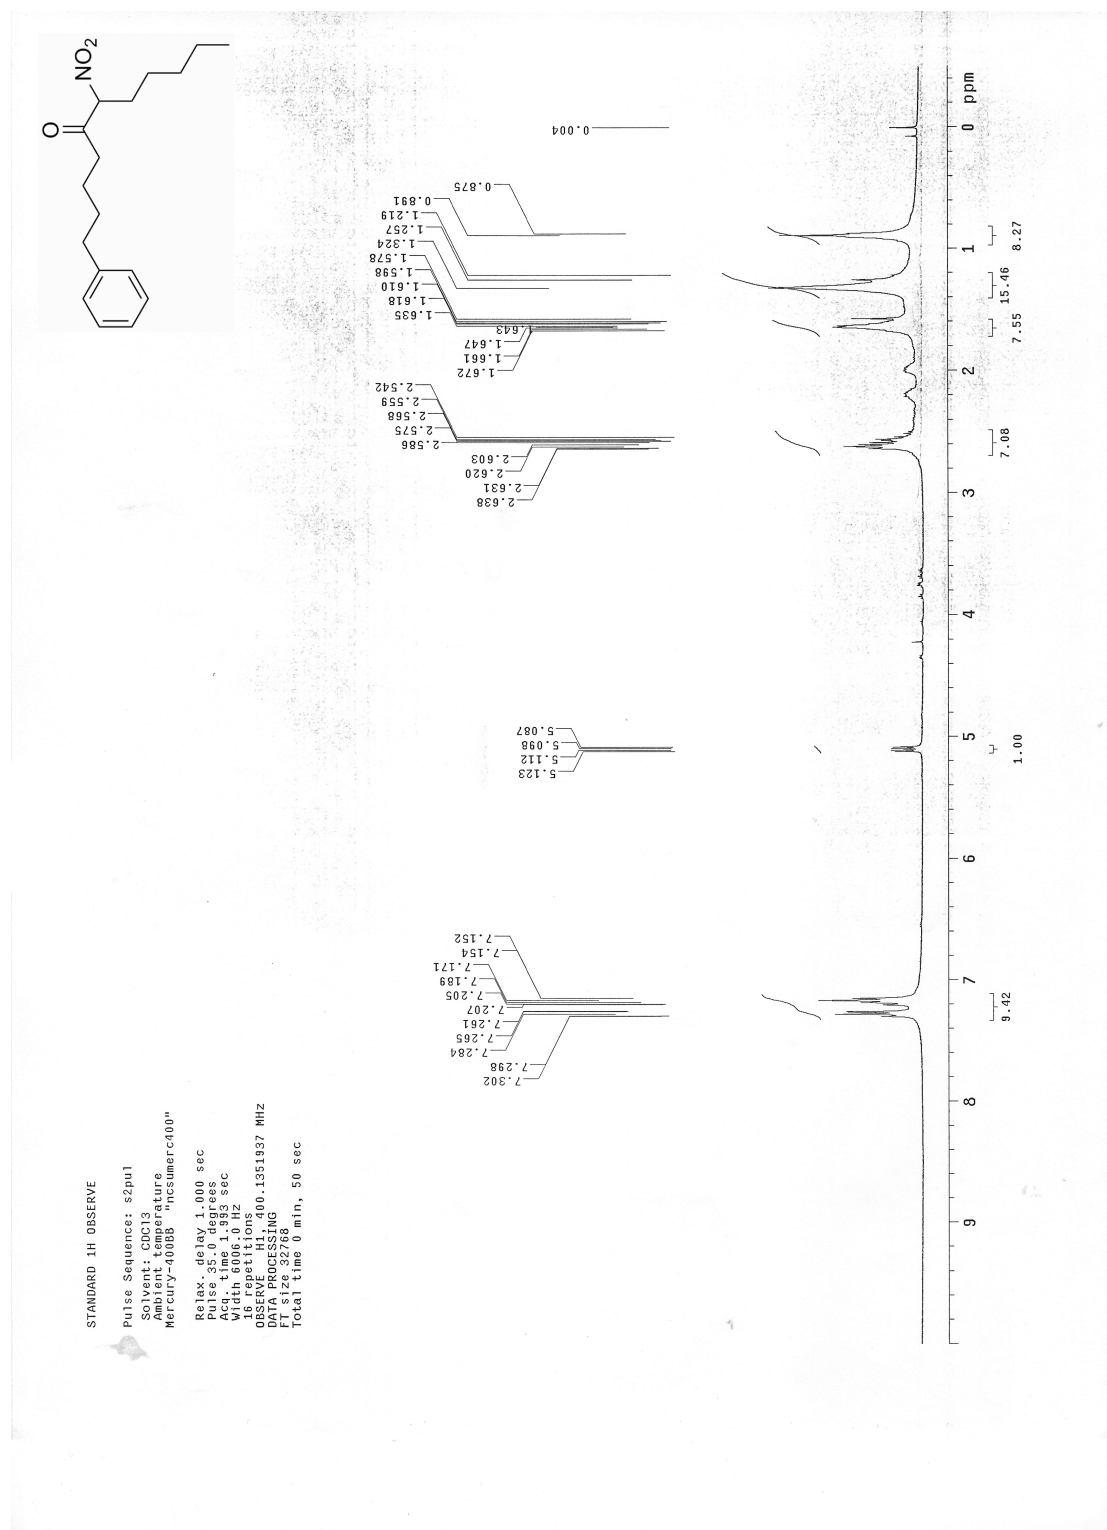

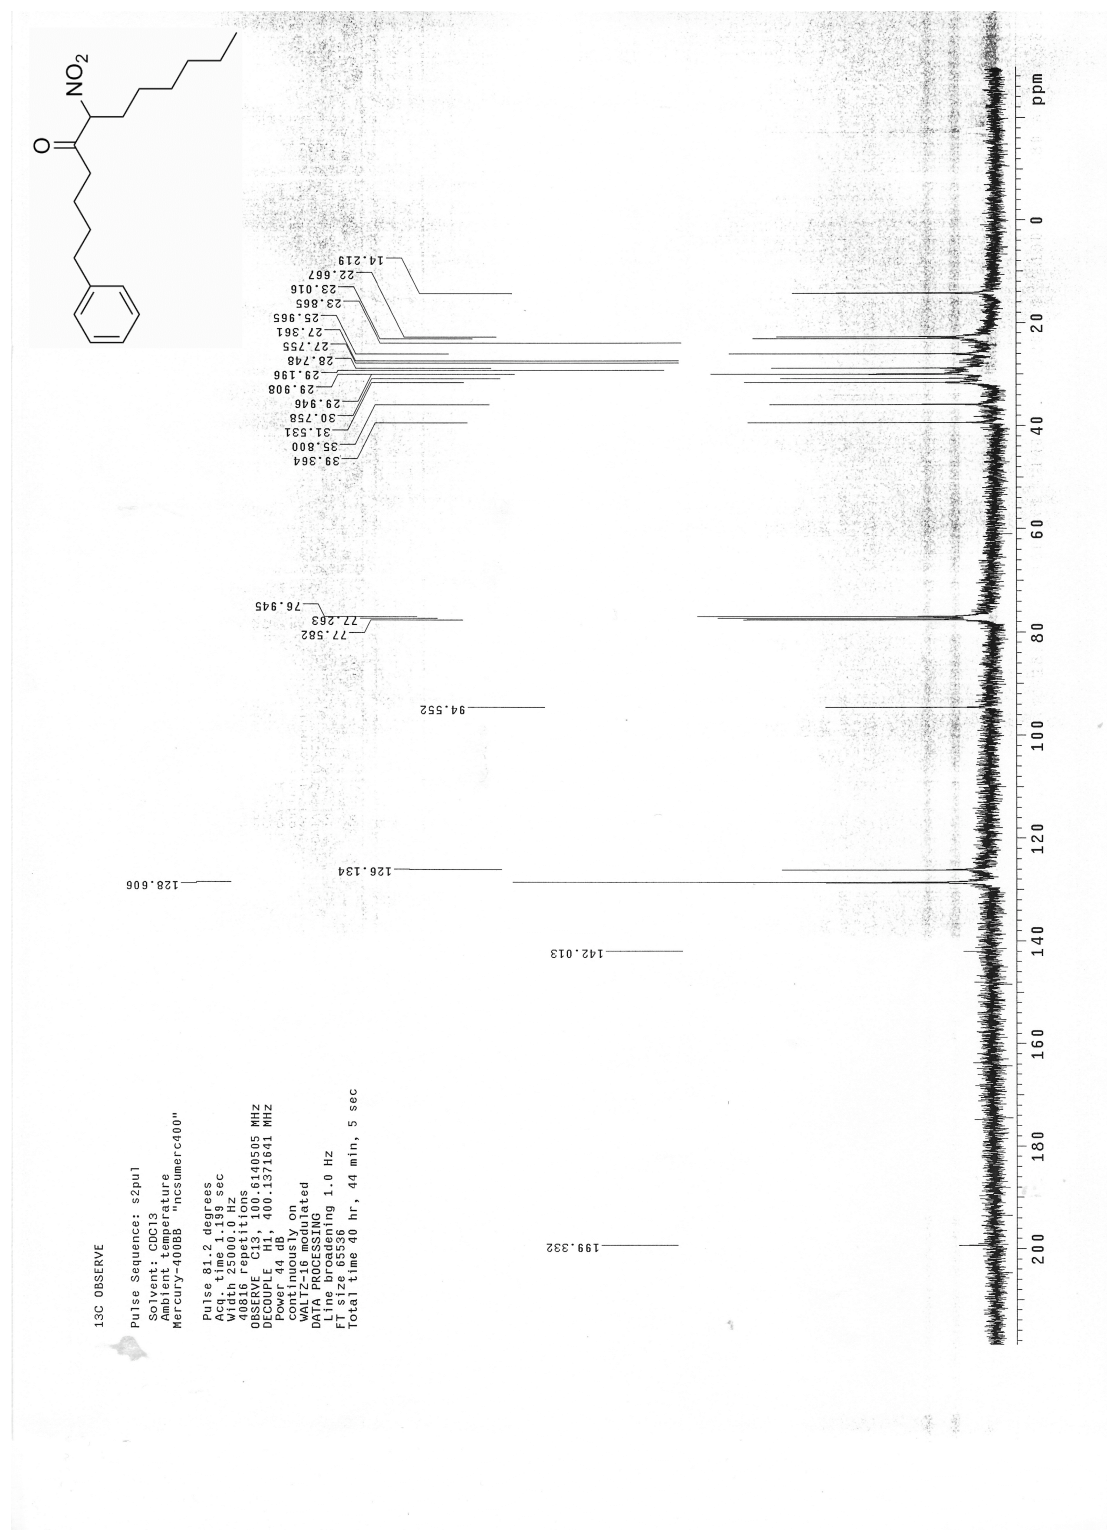

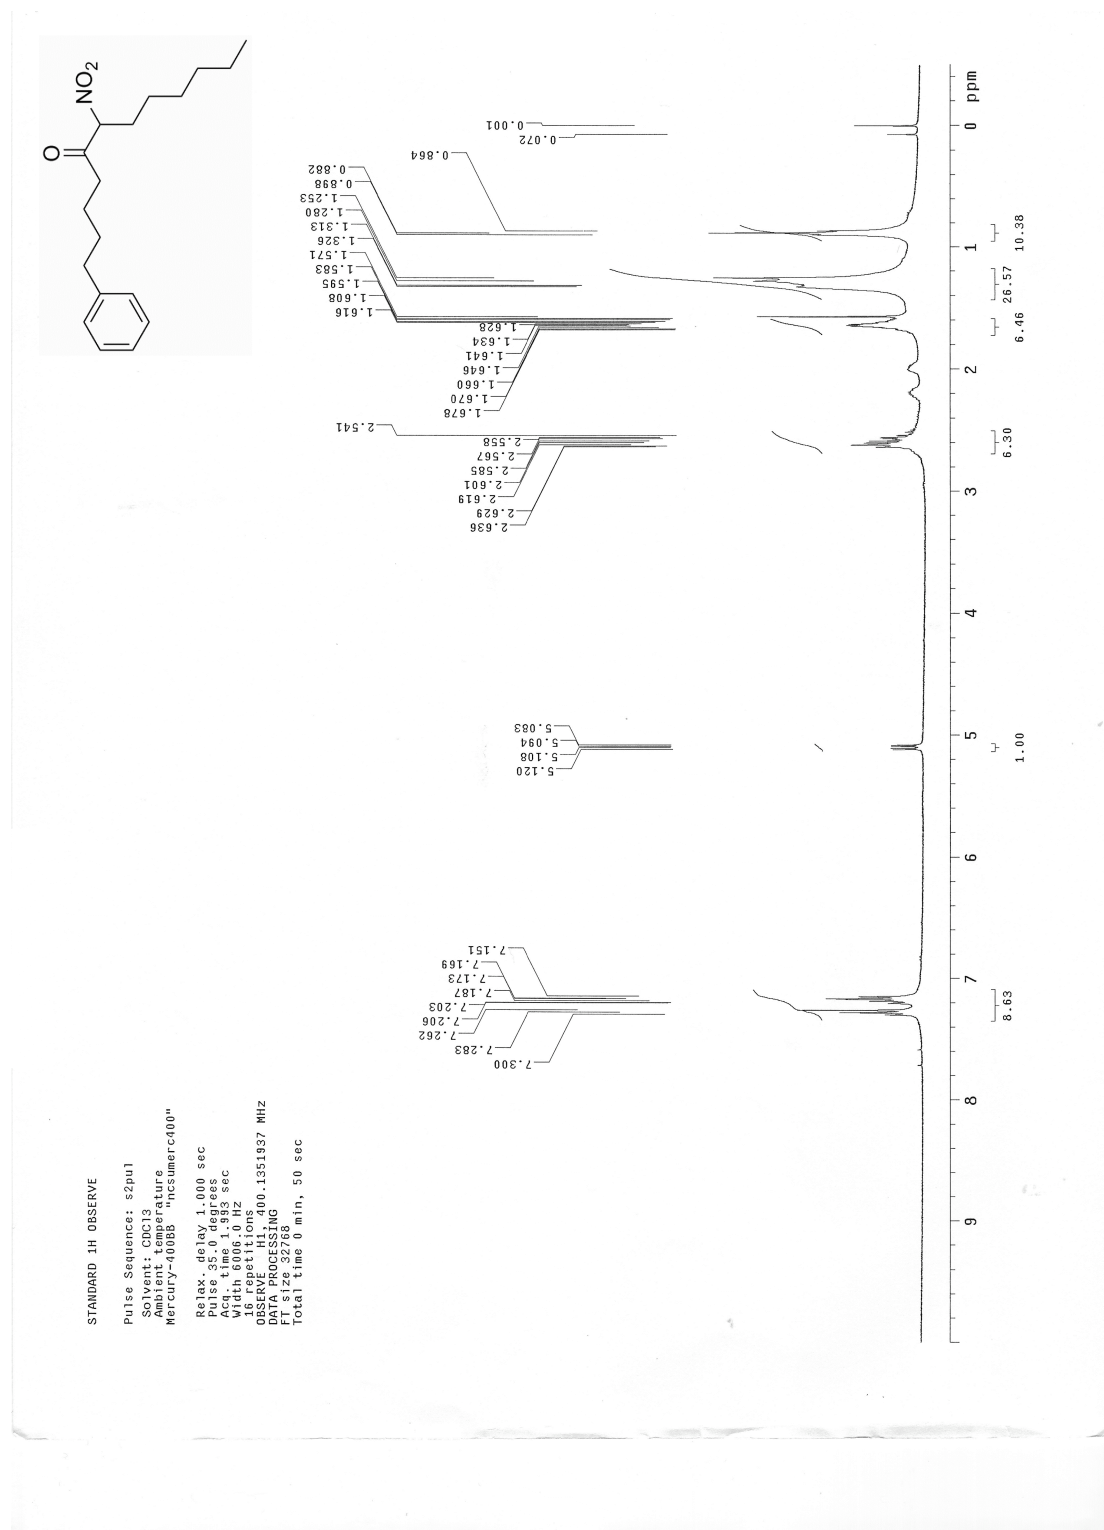

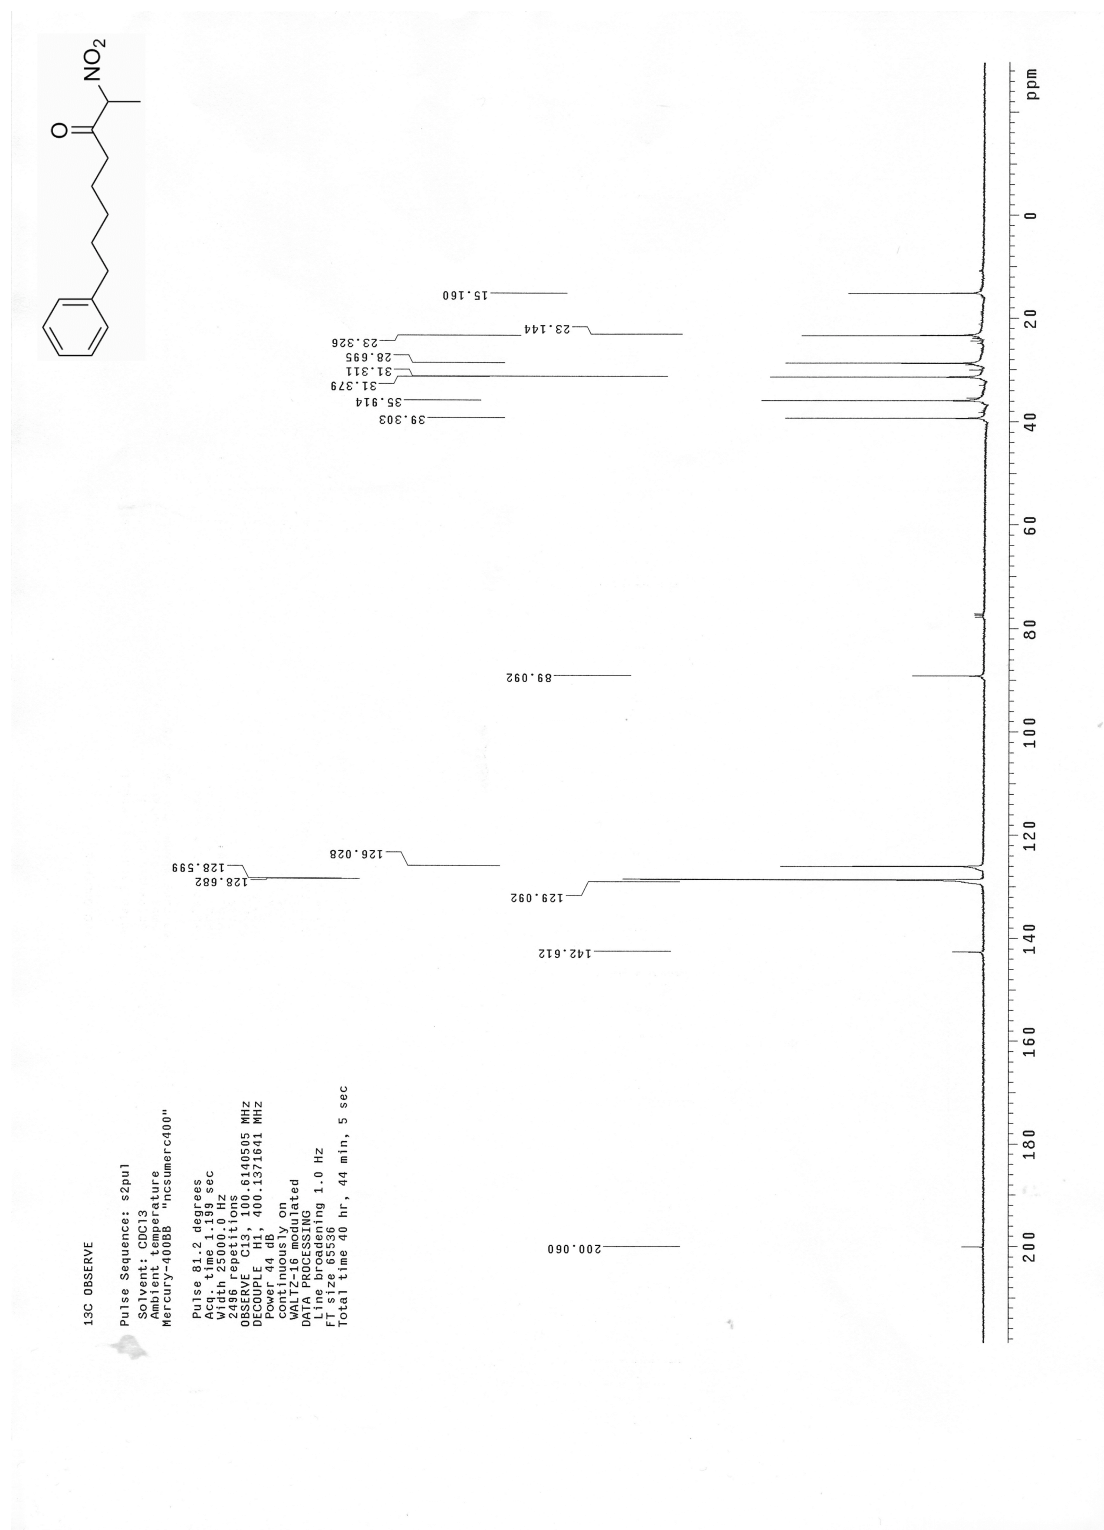



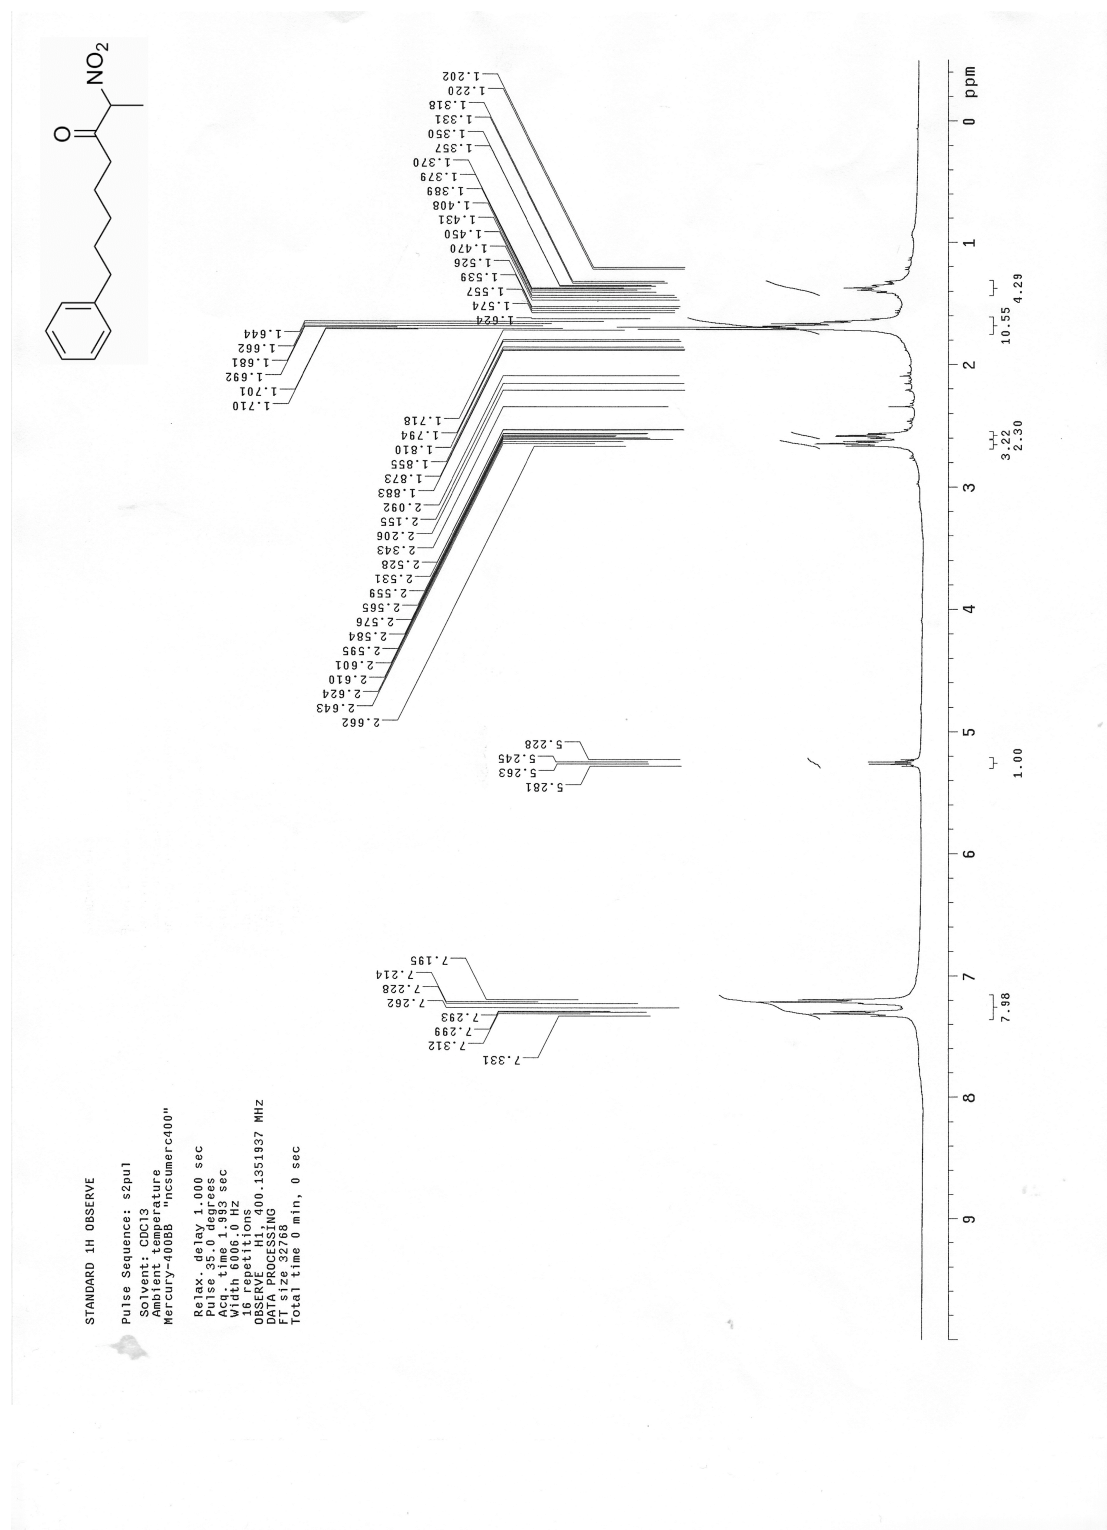

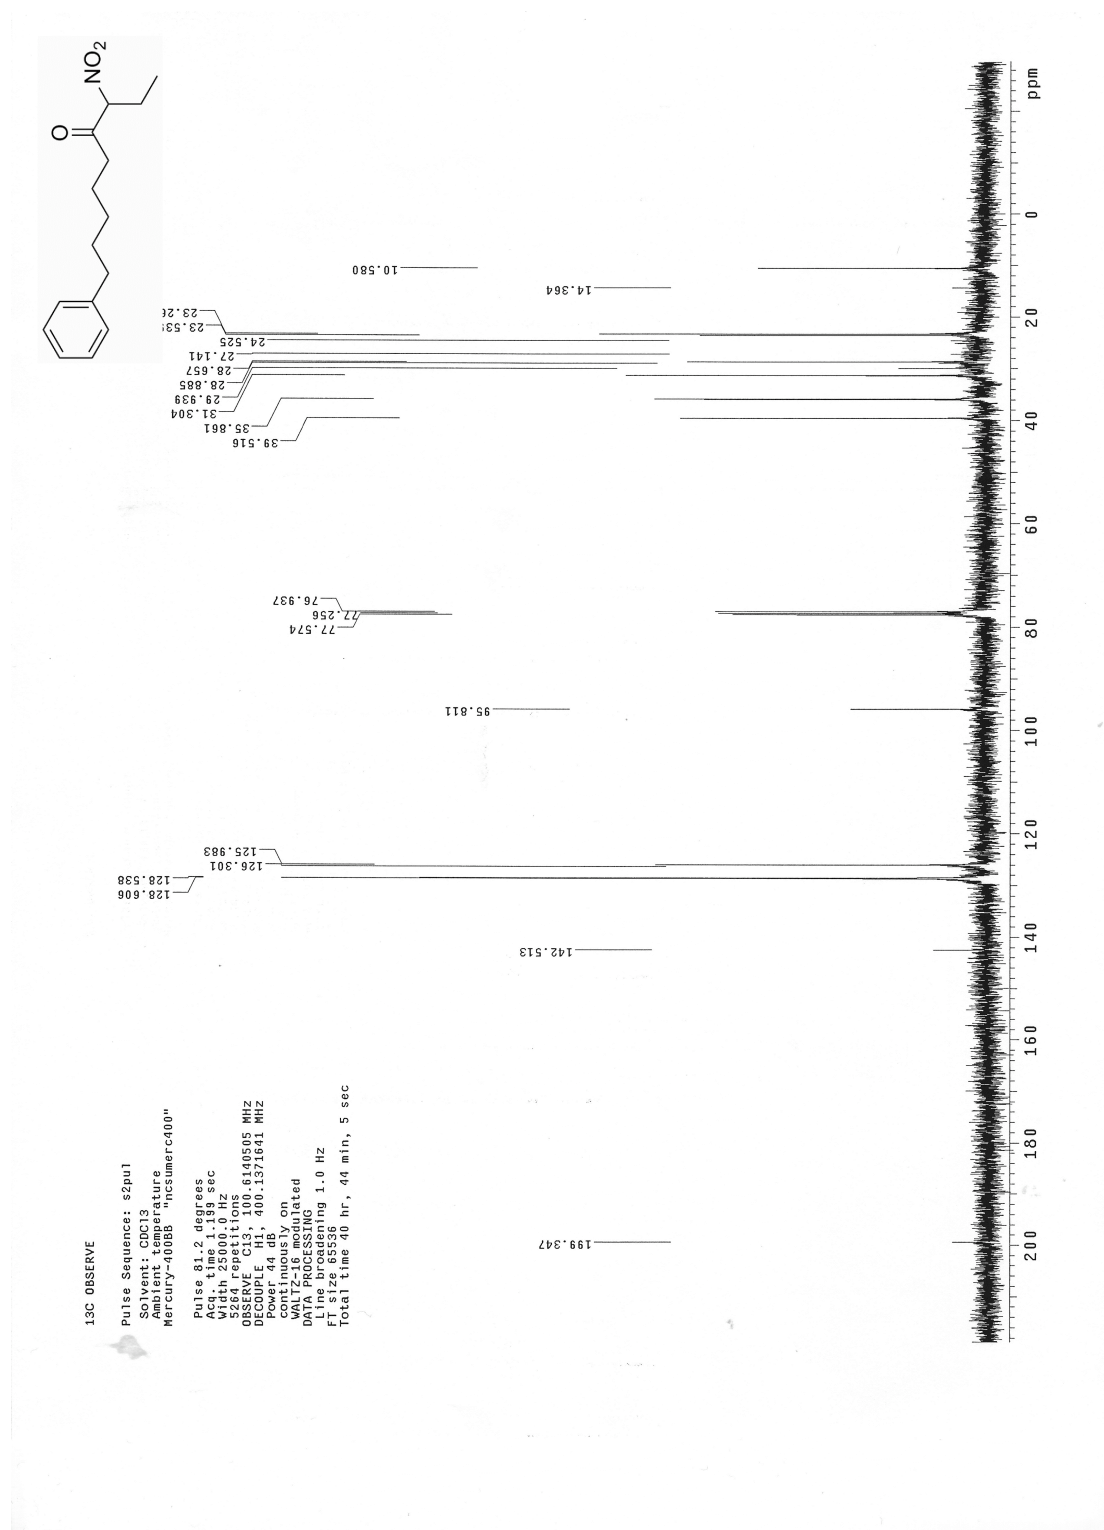

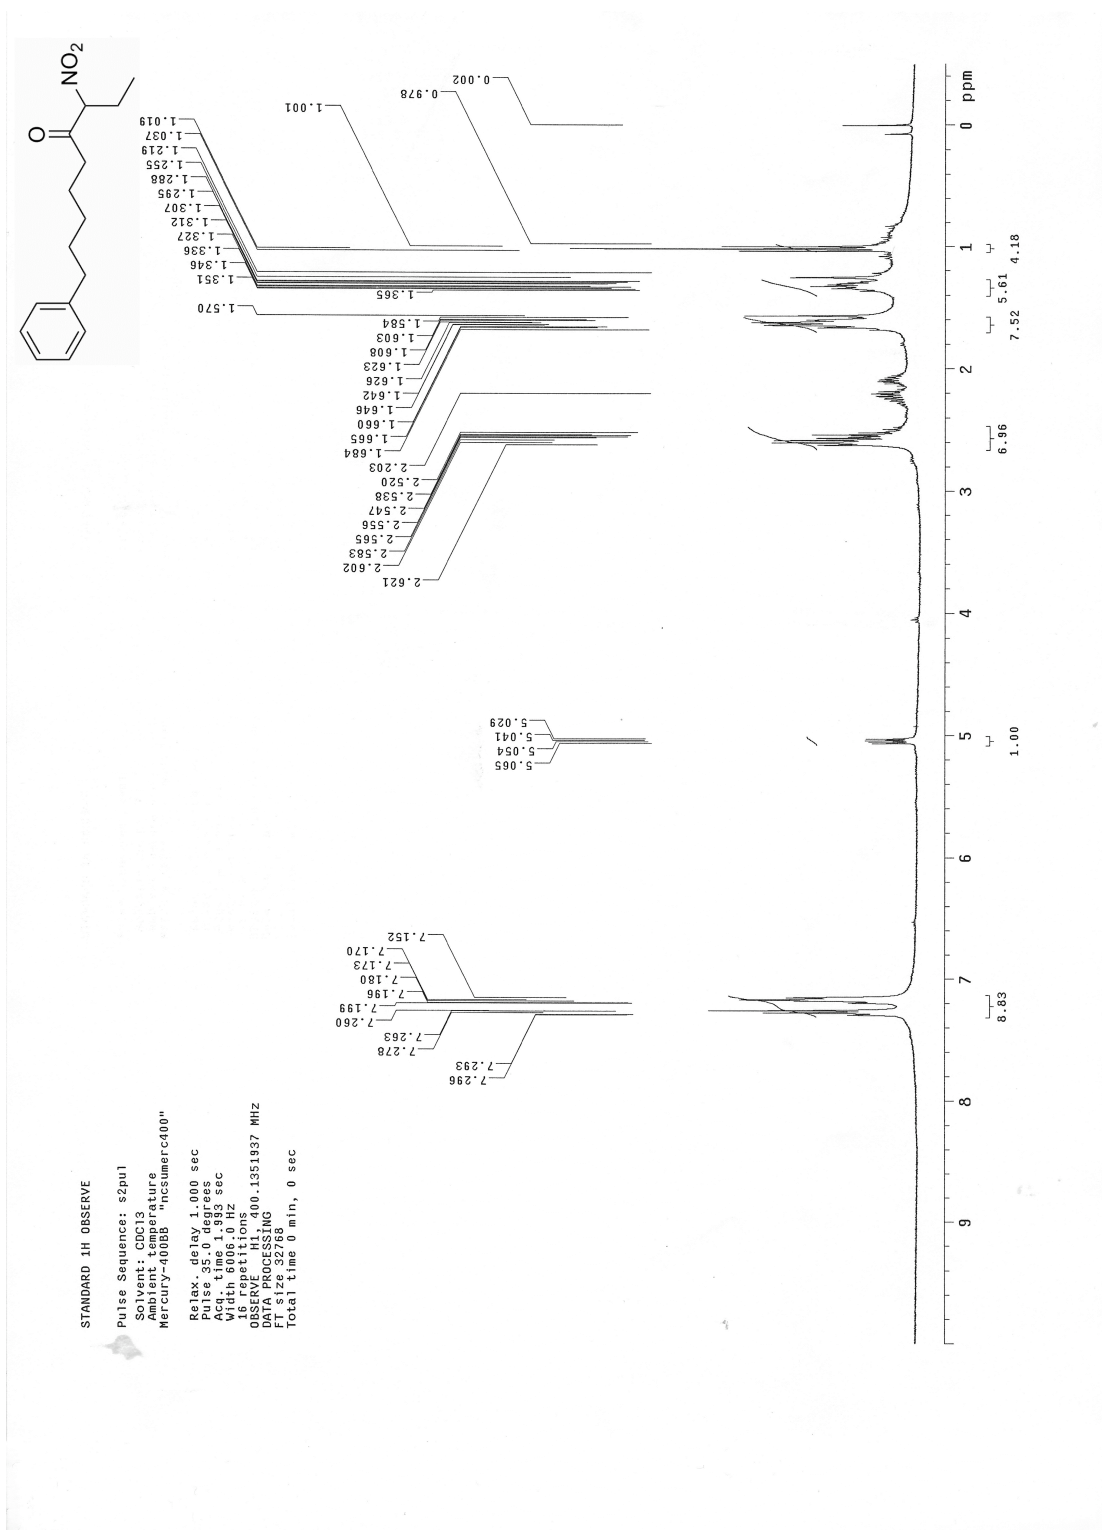



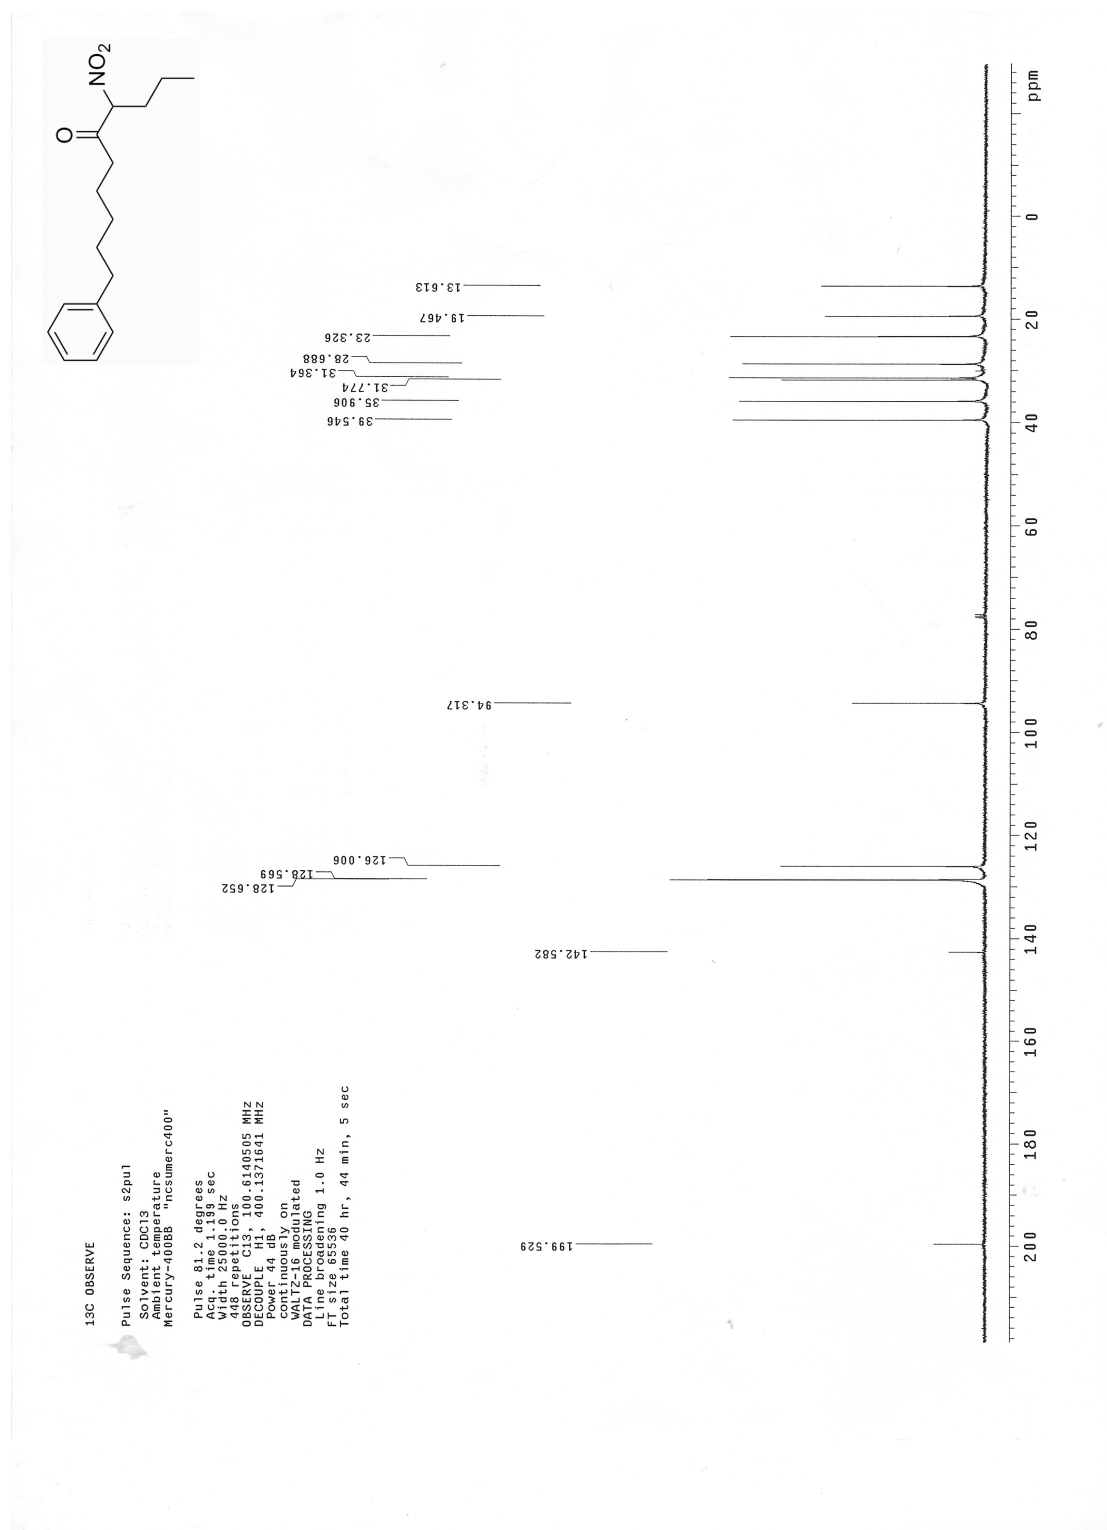

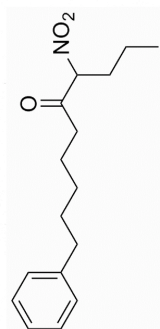

STANDARD 1H OBSERVE

```
Pulse Sequence: s2pul
Solvent: CDCl3
Ambient temperature
Mercury-400BB "nucsmrcr400"

Relax. delay 1.000 sec
Pulse 35.0 degrees
Acq. time 1.993 sec
width 6000.0 Hz
16 repetitions
OBSERVE H1, 400.1351937 MHZ
DATA PROCESSING
FT size 32768
Total time 0 min, 50 sec
```

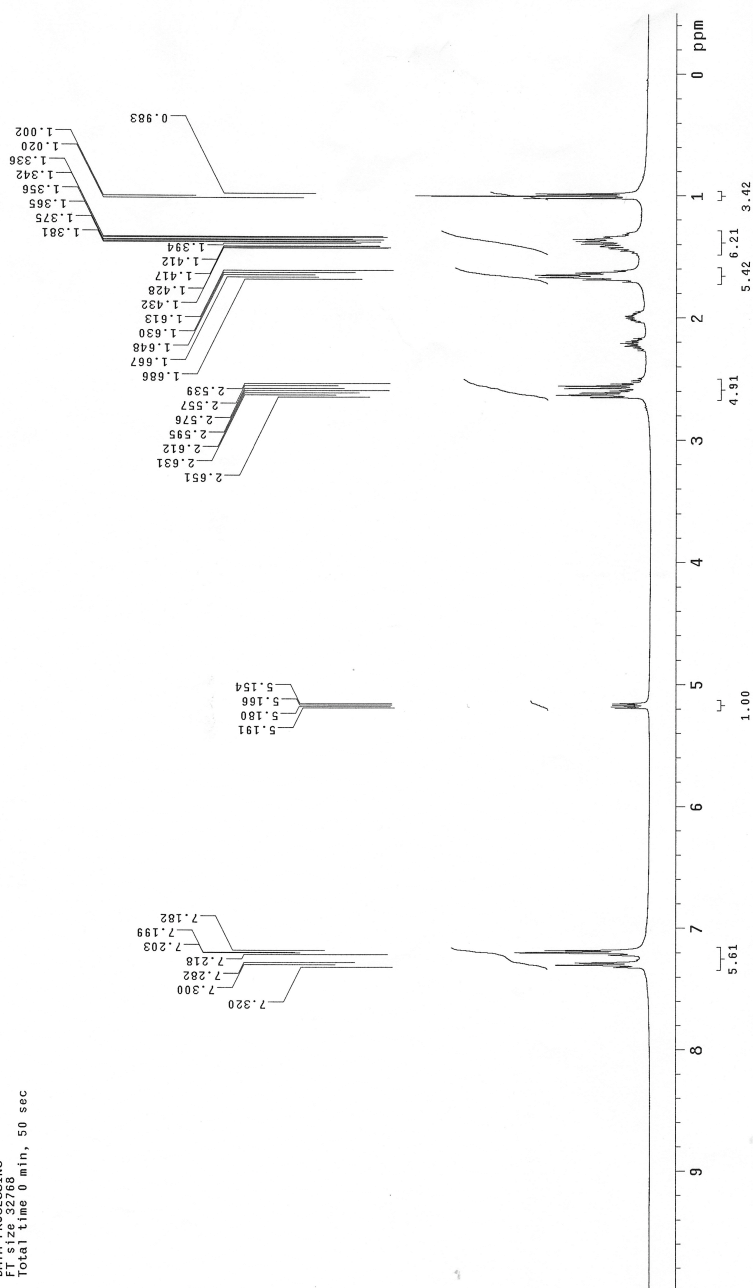

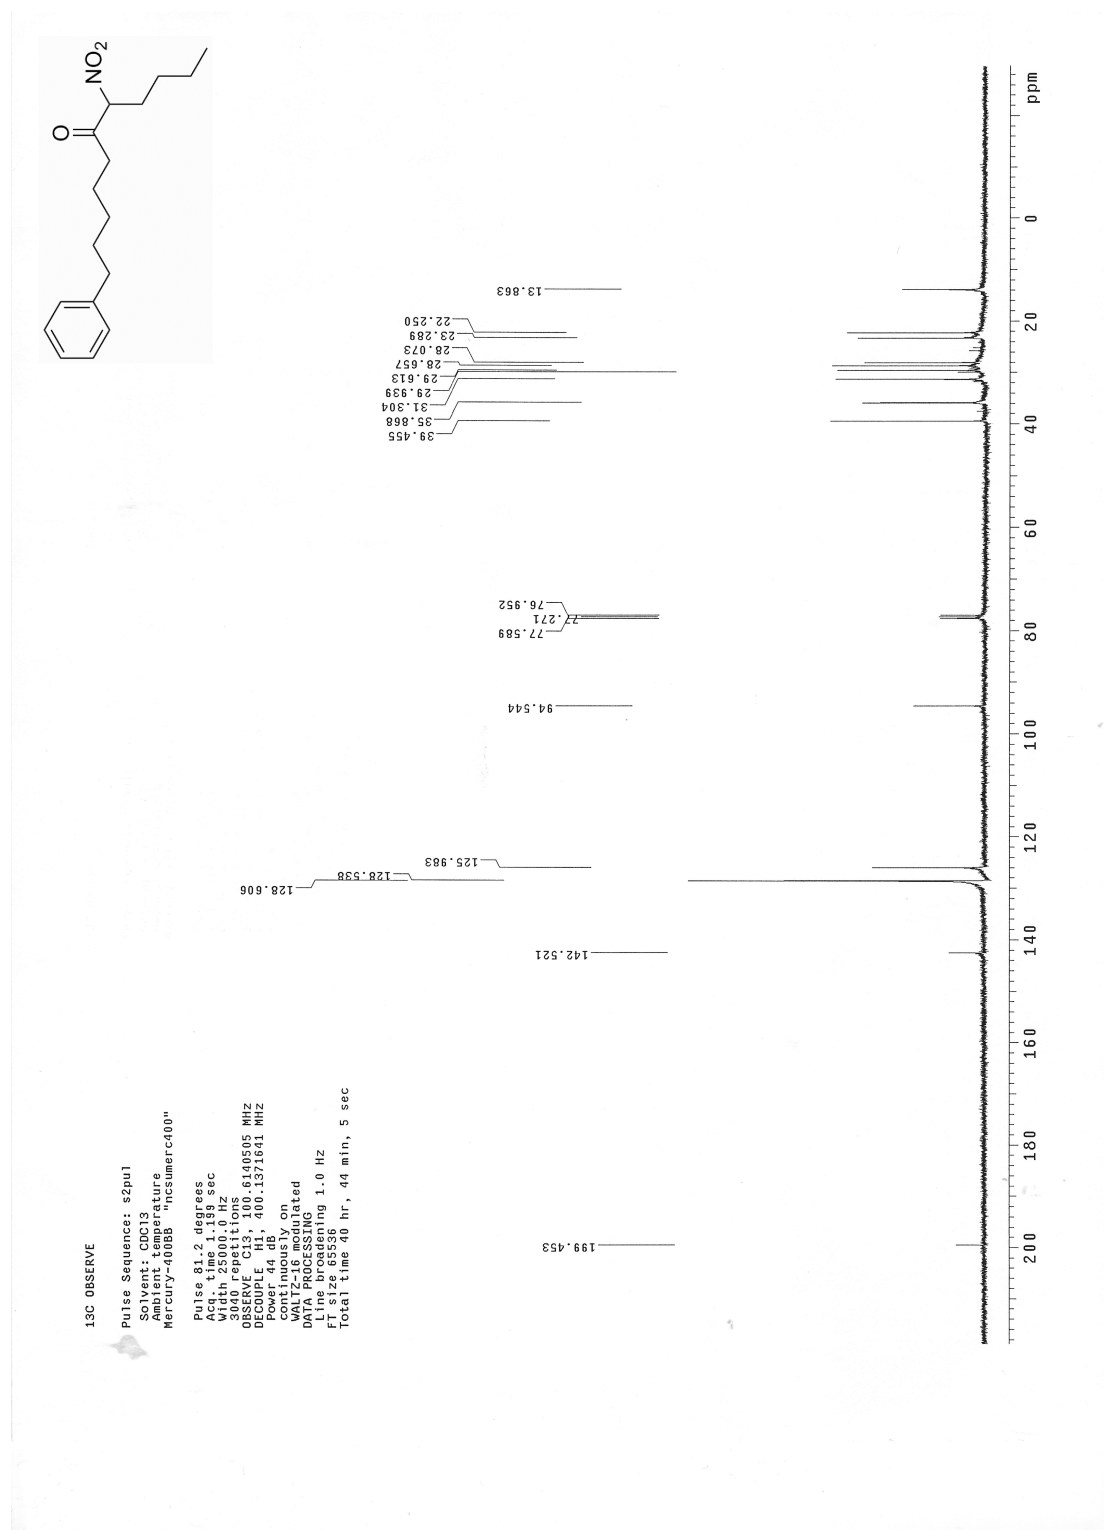

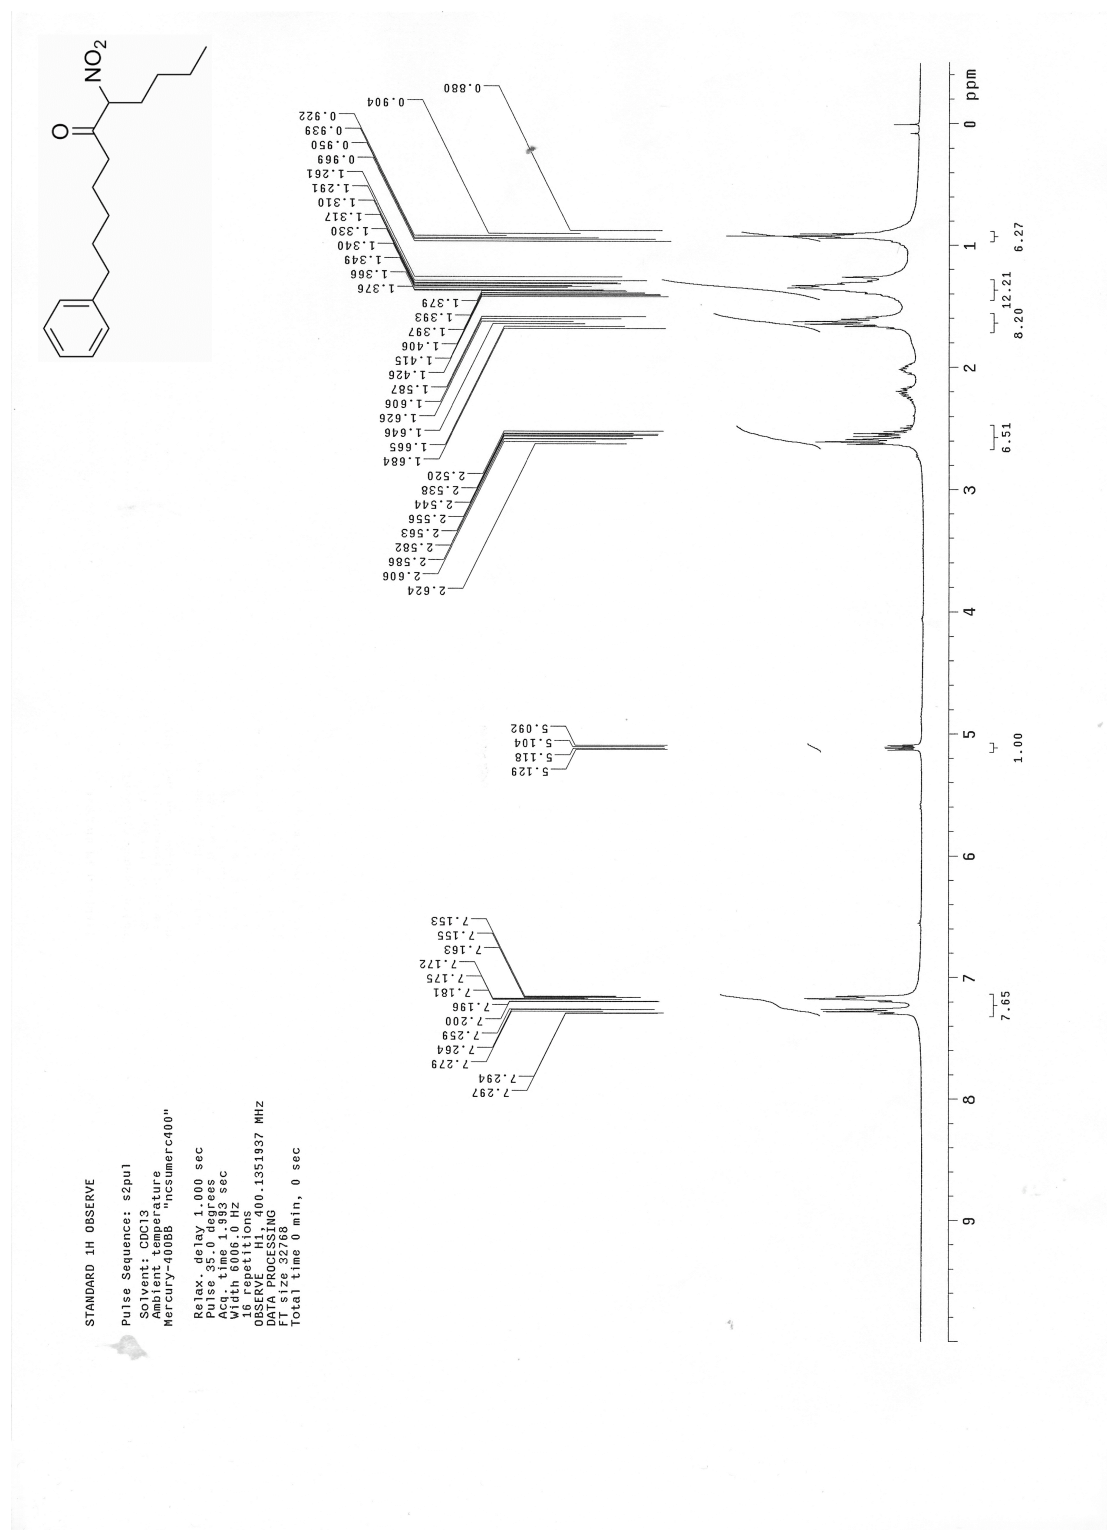

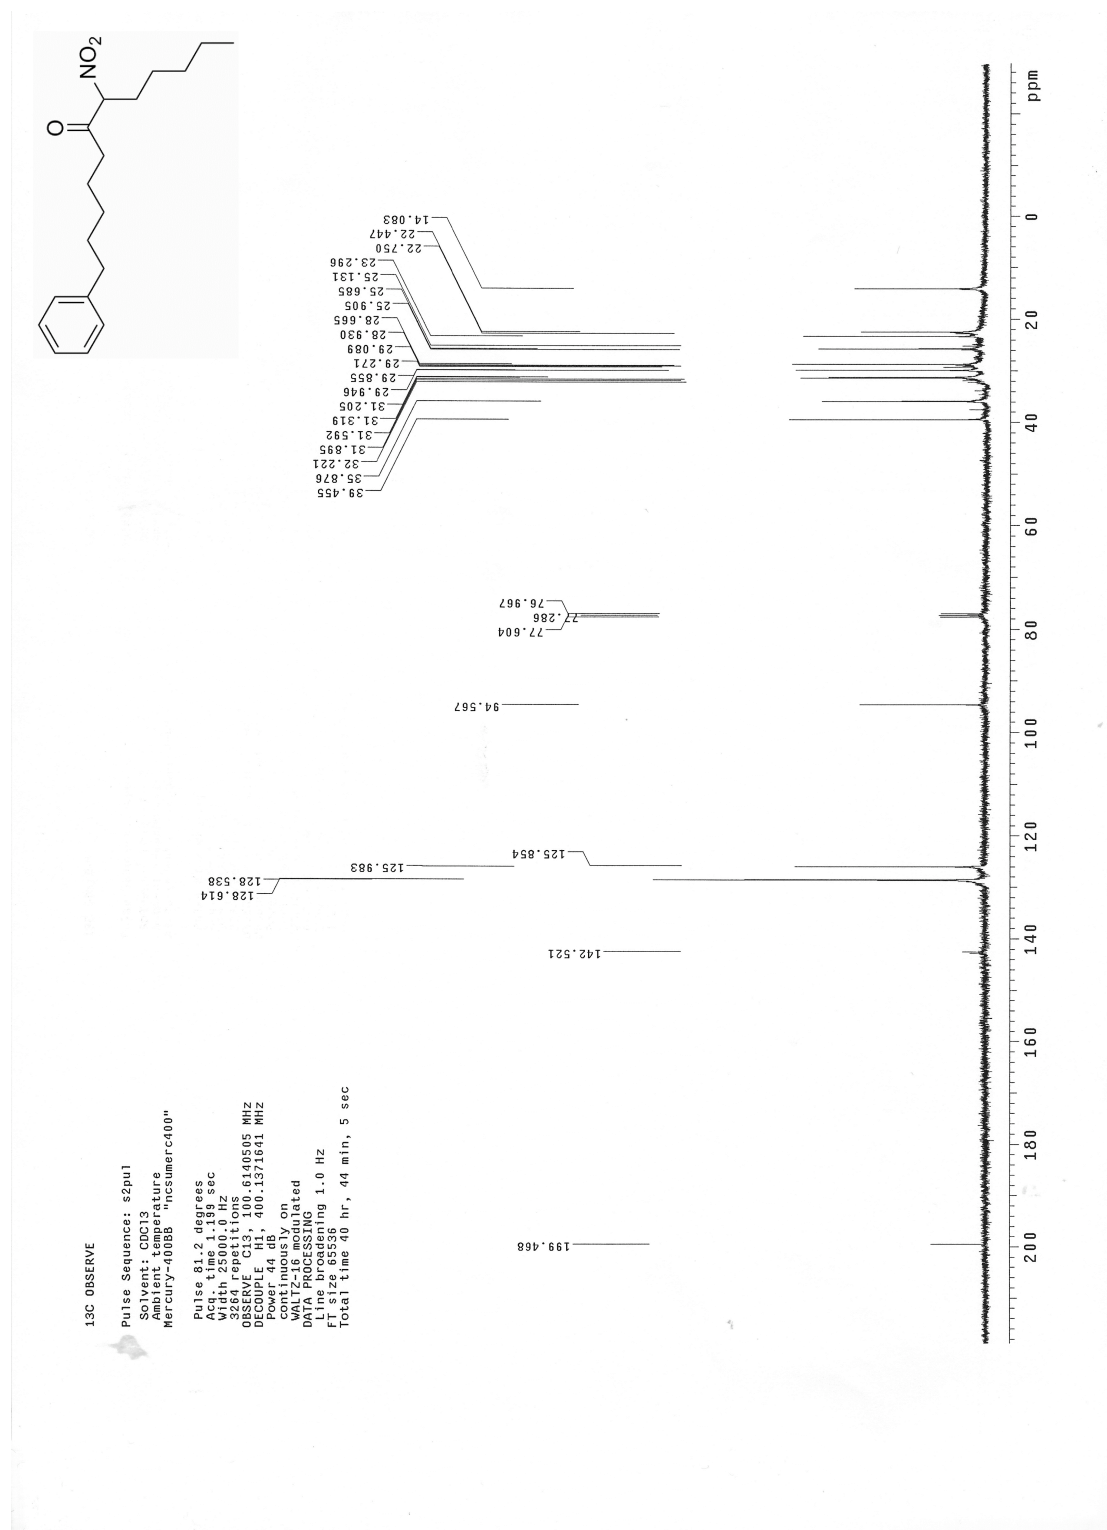

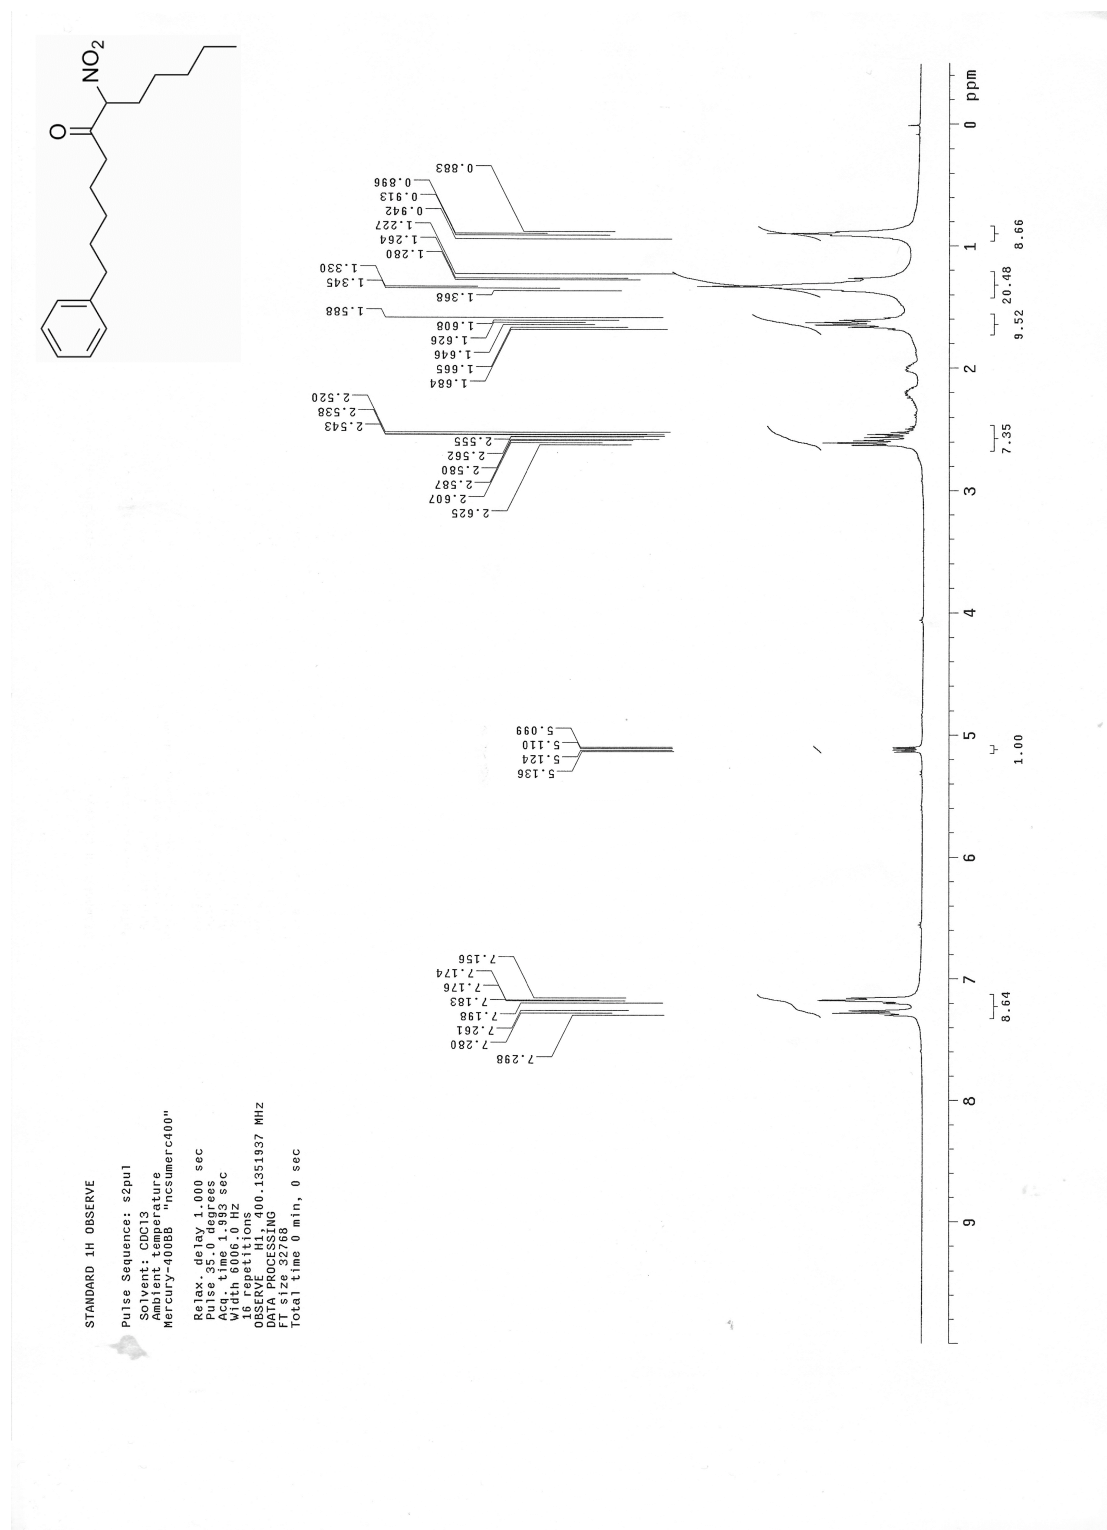



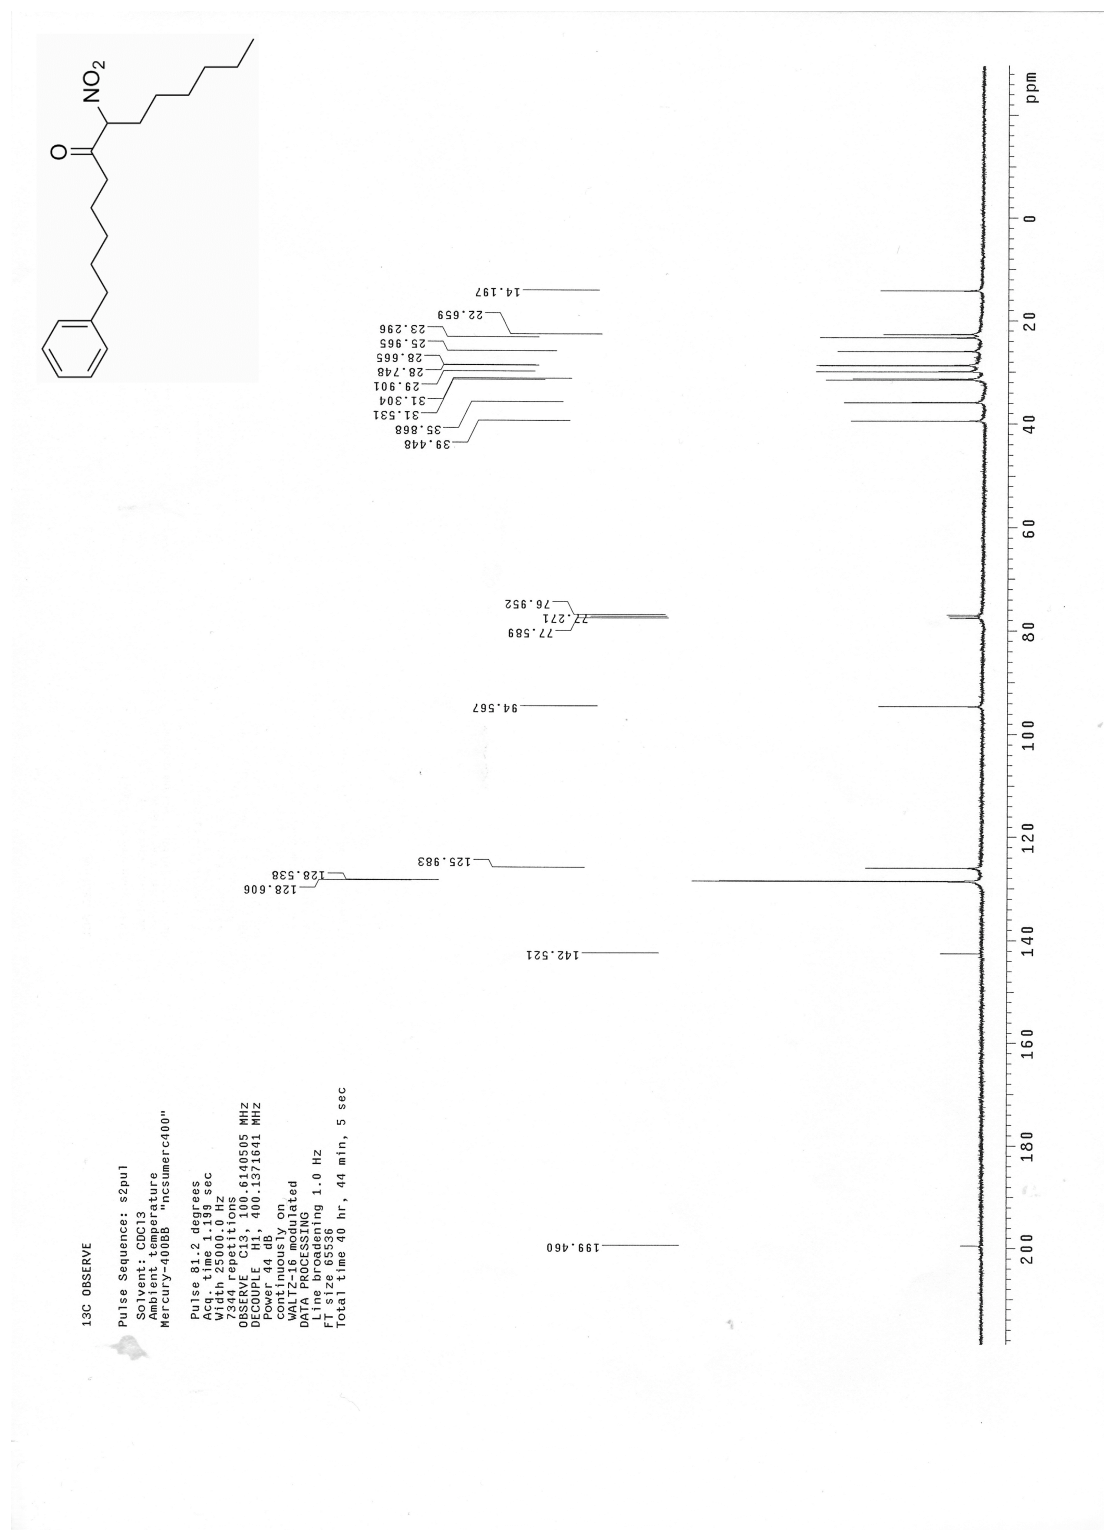



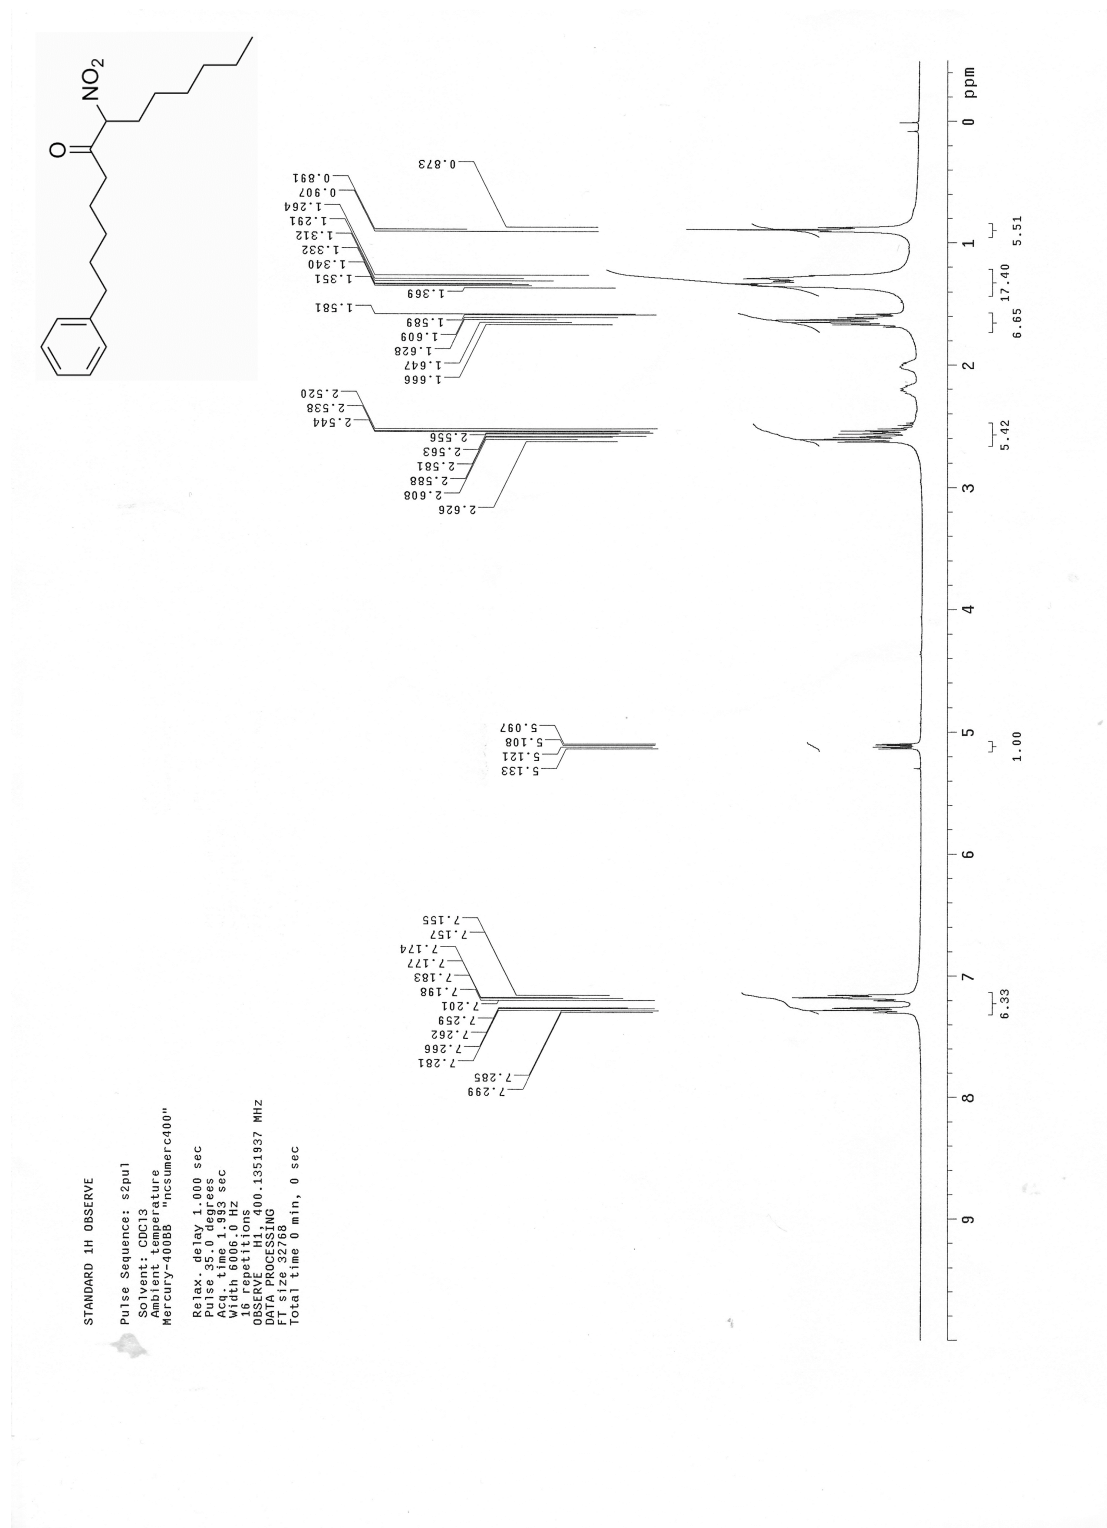

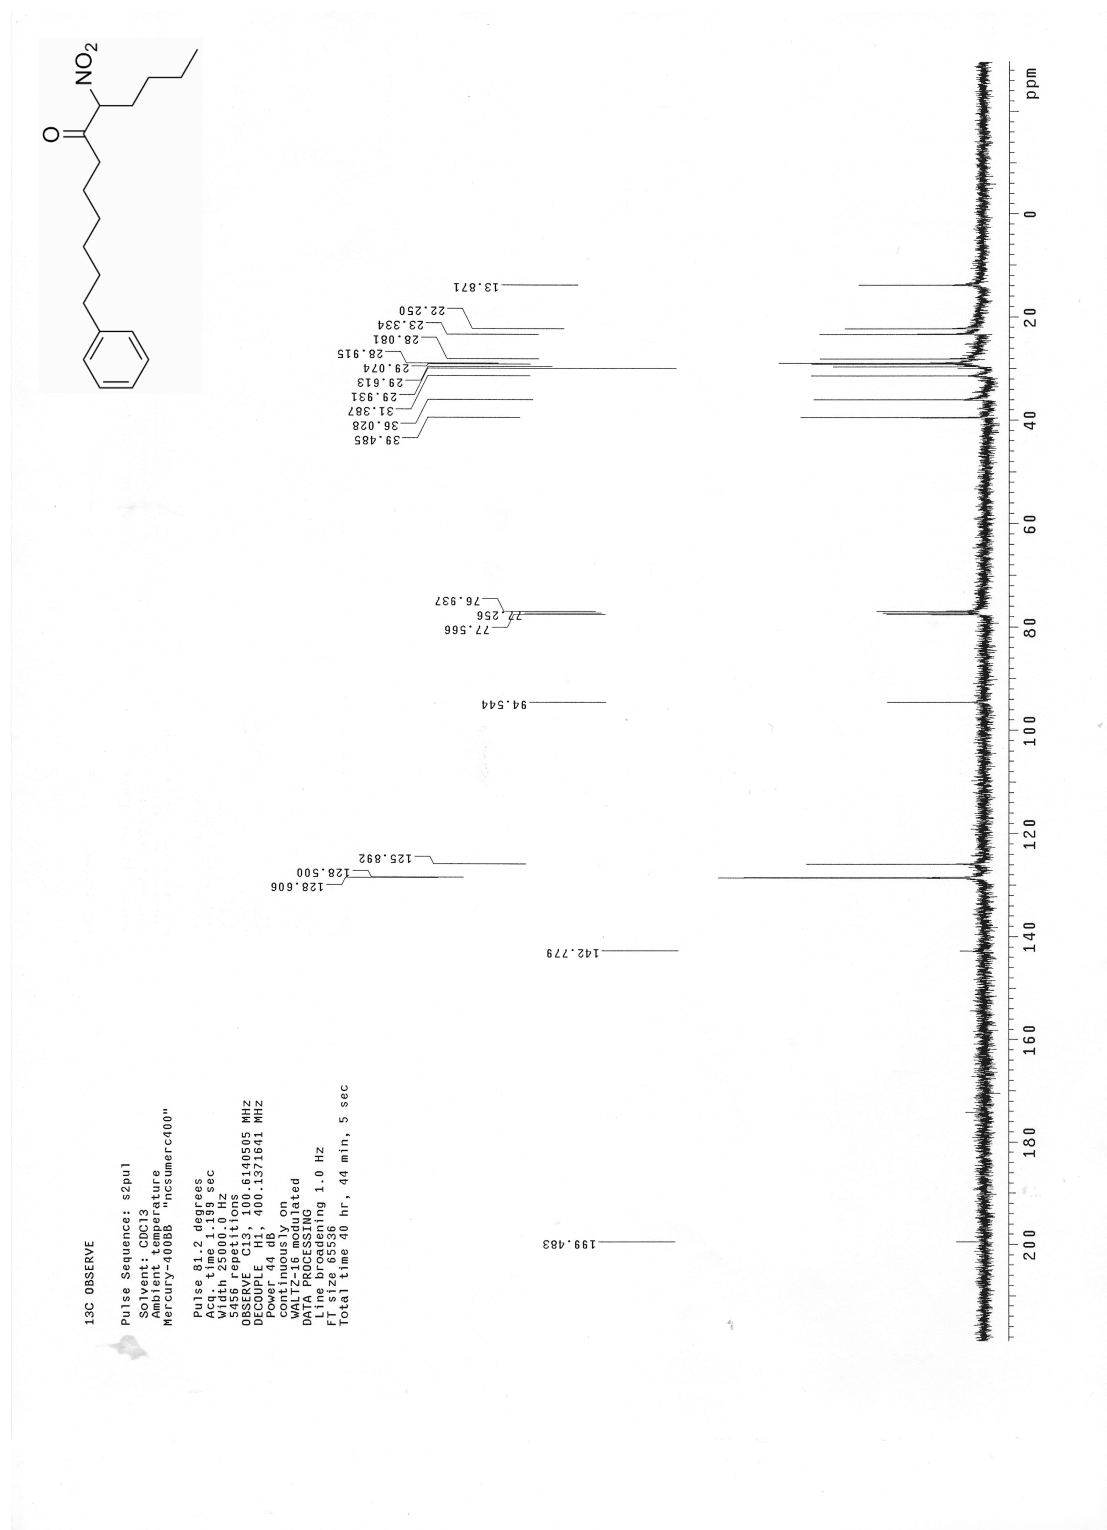

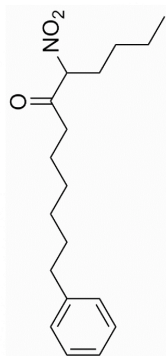

STANDARD 1H OBSERVE

Pulse Sequence: s2pu1  
Solvent: CDCl3  
Ambient temperature  
F1: 400.1351937 MHz  
Mercury-400BB "ncsumerc400"  
Relax. delay 1.000 sec  
Pulse 35.0 degrees  
Acq. time 1.993 sec  
Width 1006.0 Hz  
16 repetitions  
OBSERVE H1, 400.1351937 MHz  
DATA PROCESSING  
Total time 0 min, 50 sec

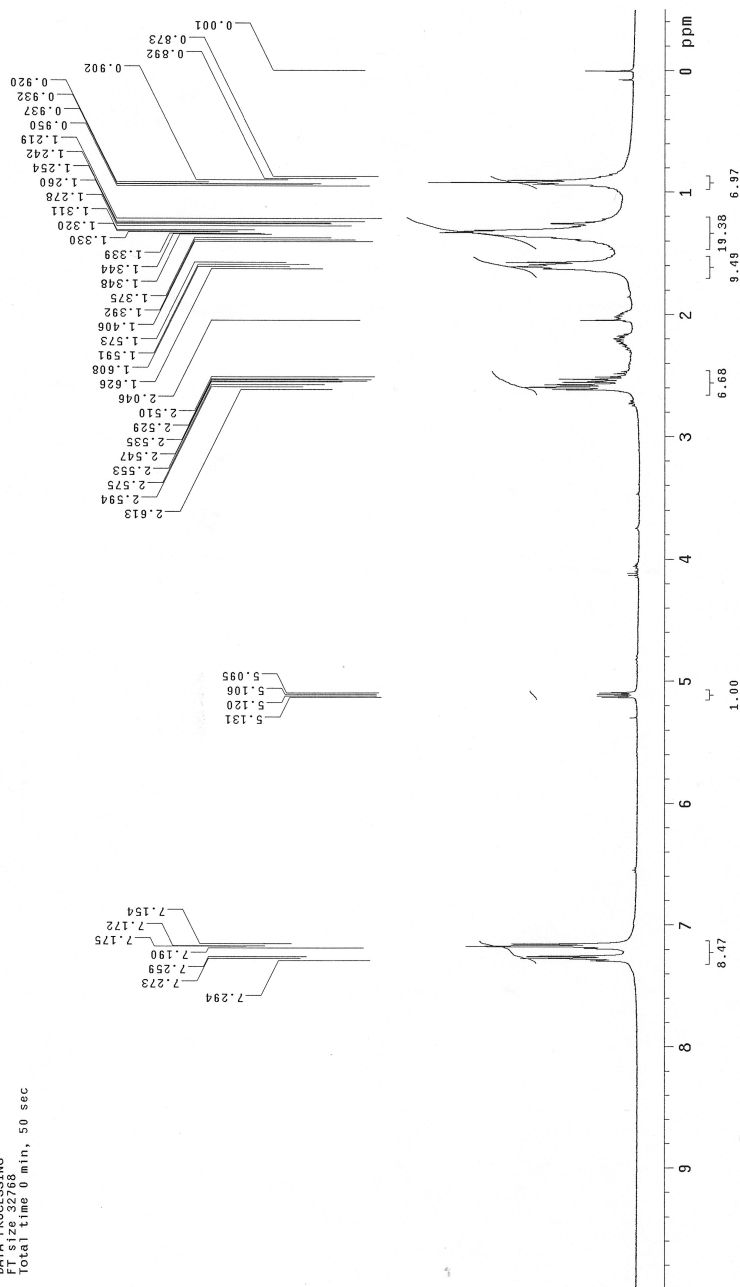

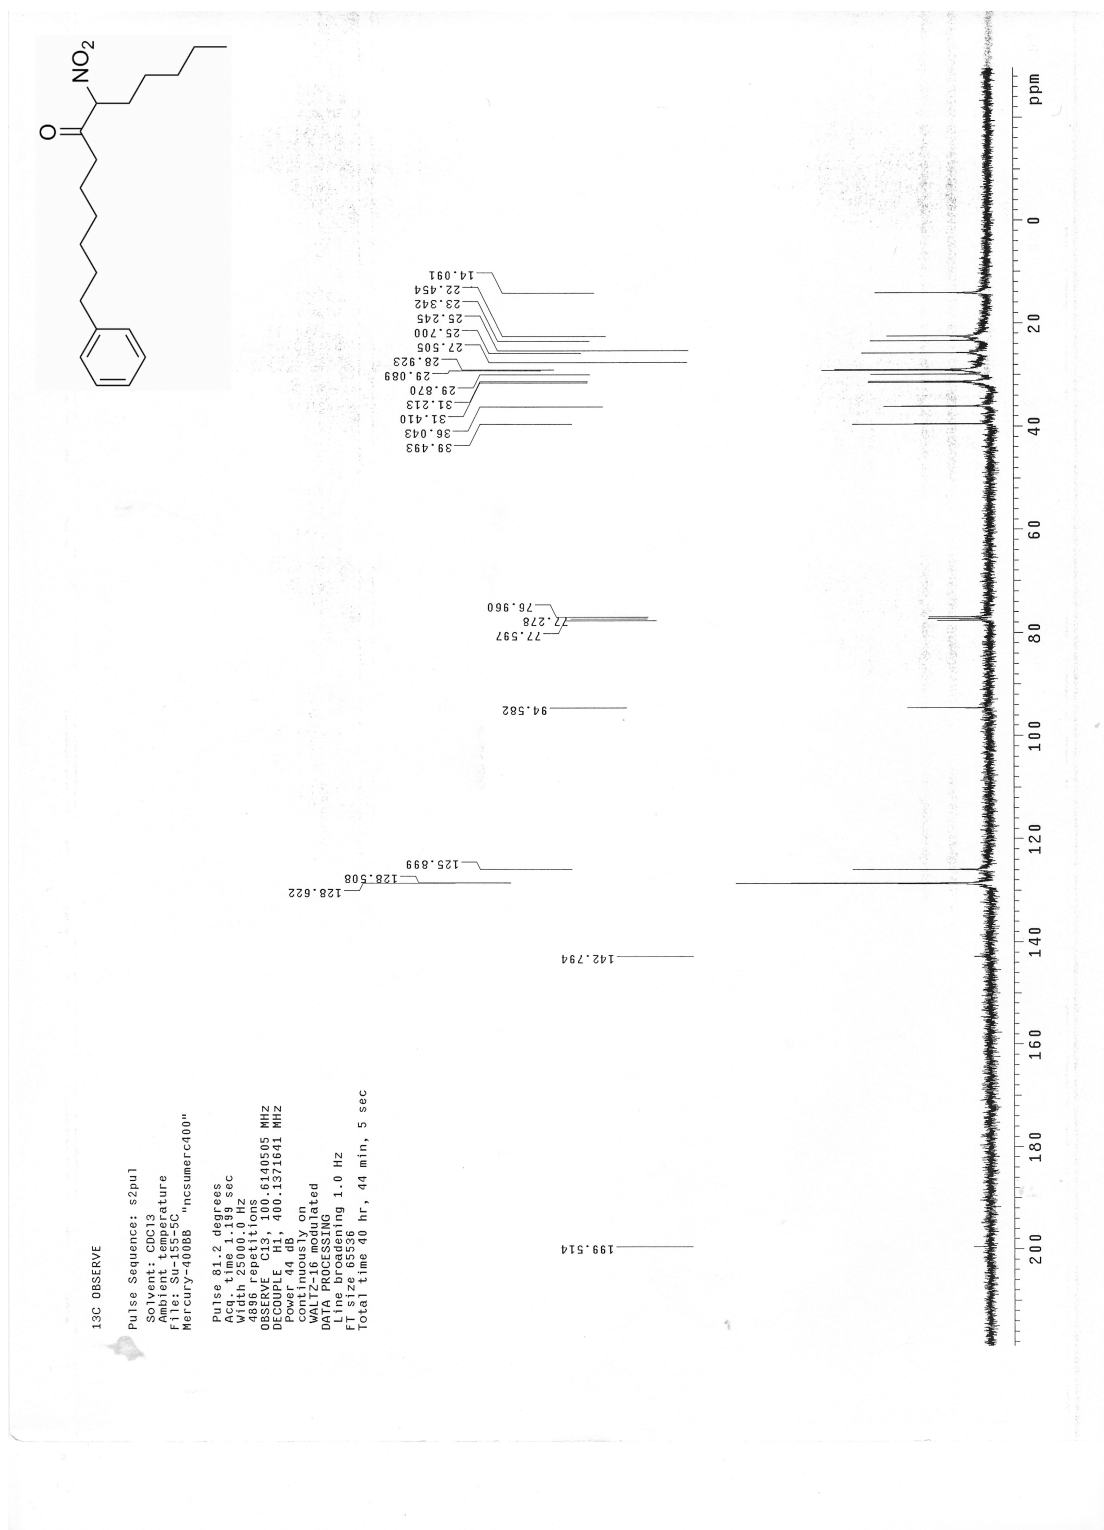

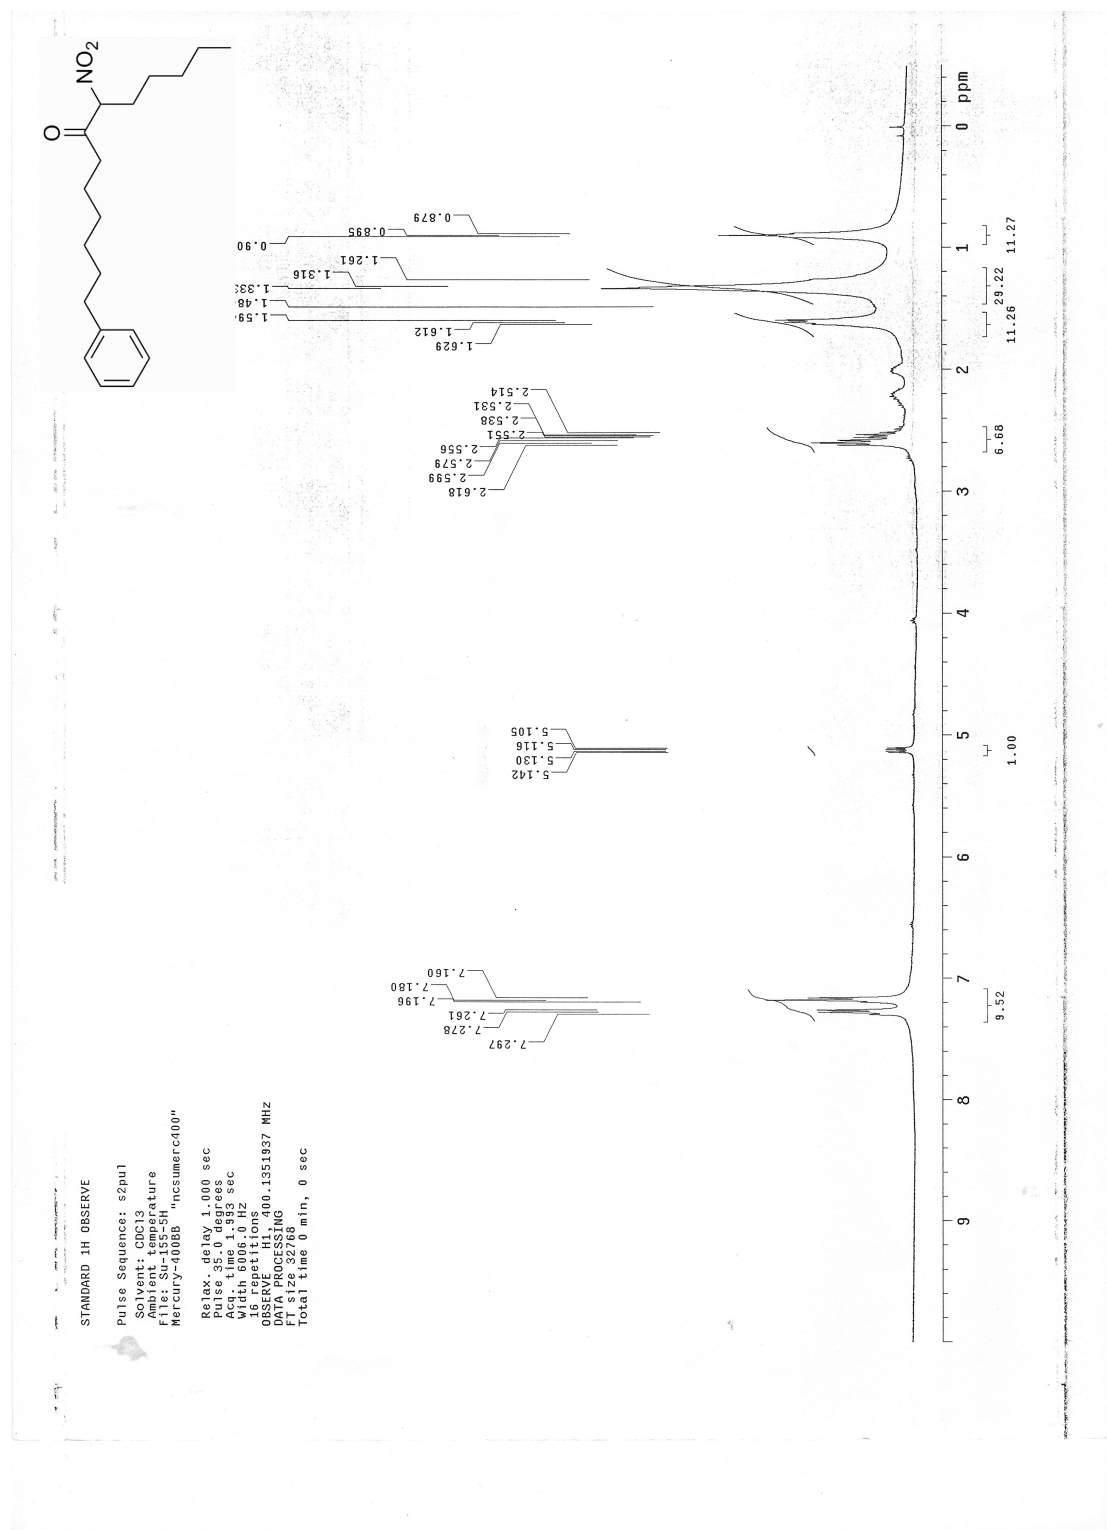



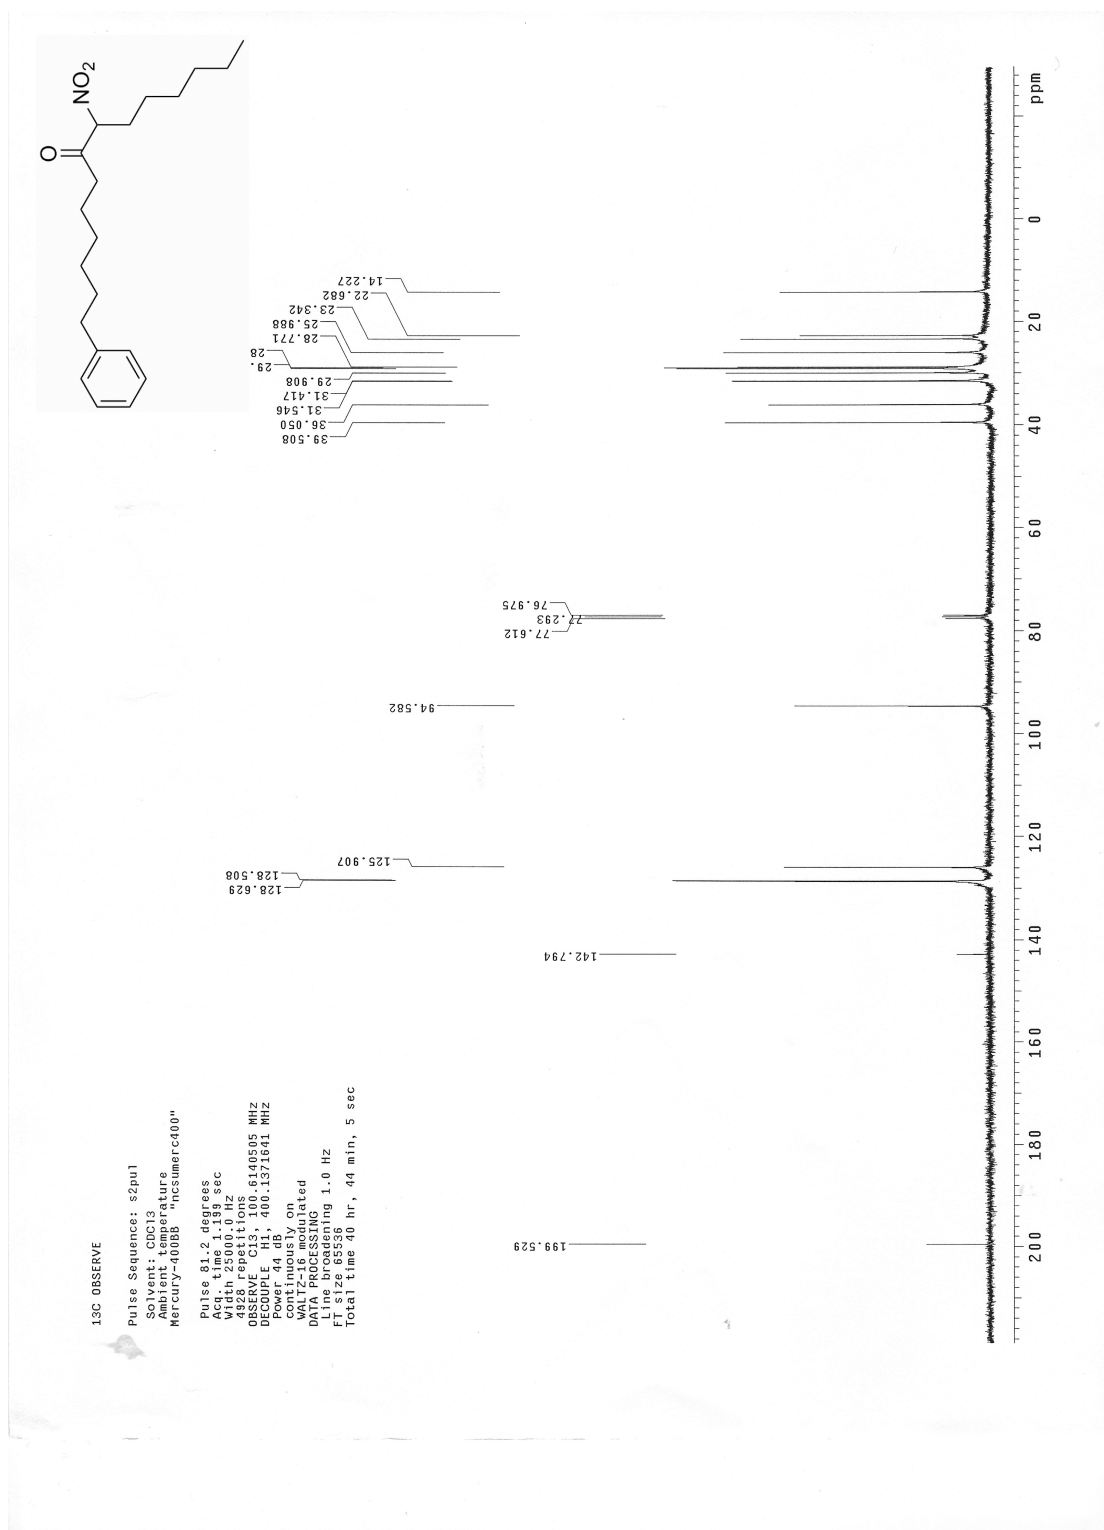



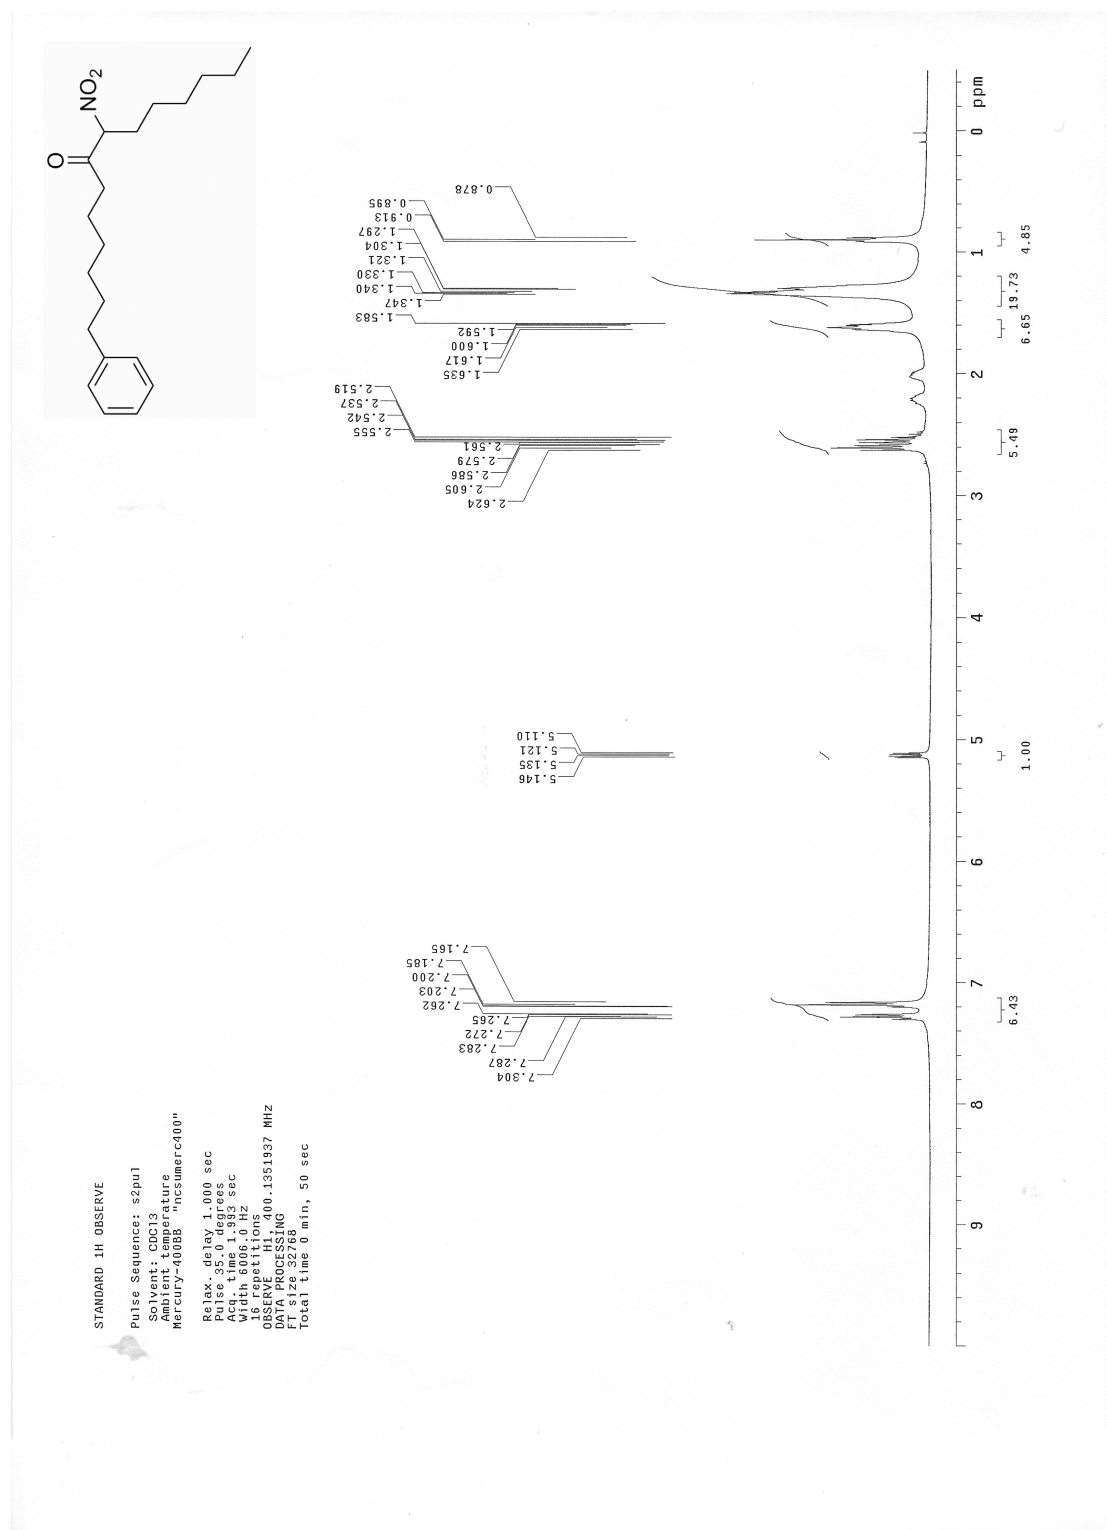

# NMR data for $\alpha$ -bromo ketones

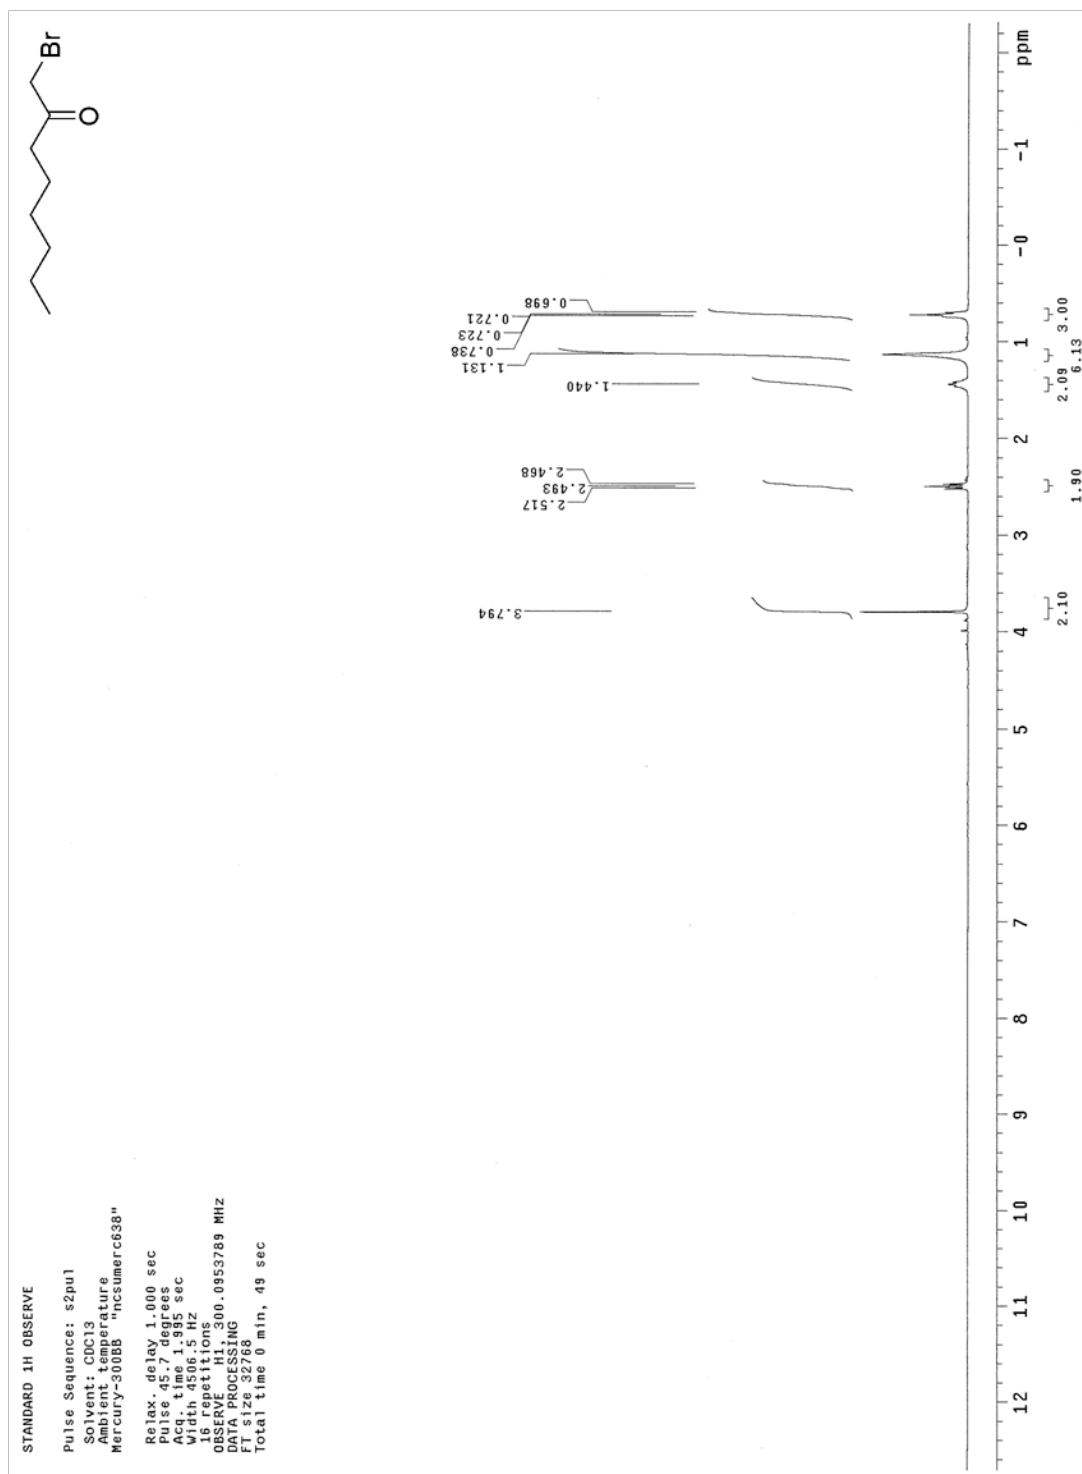

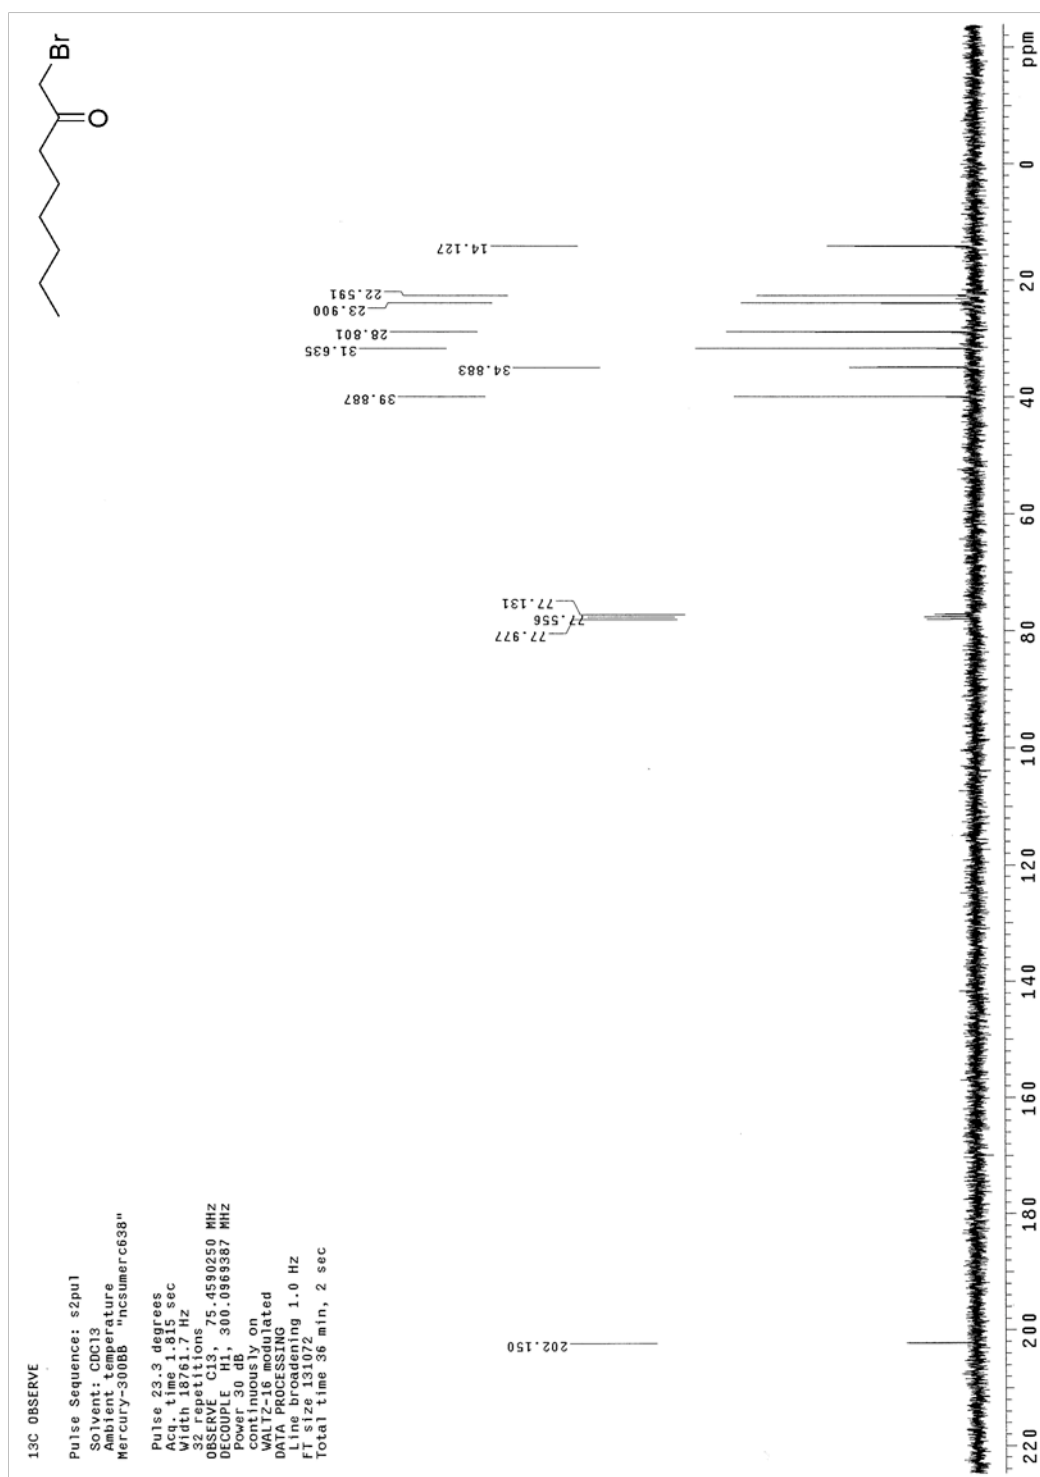

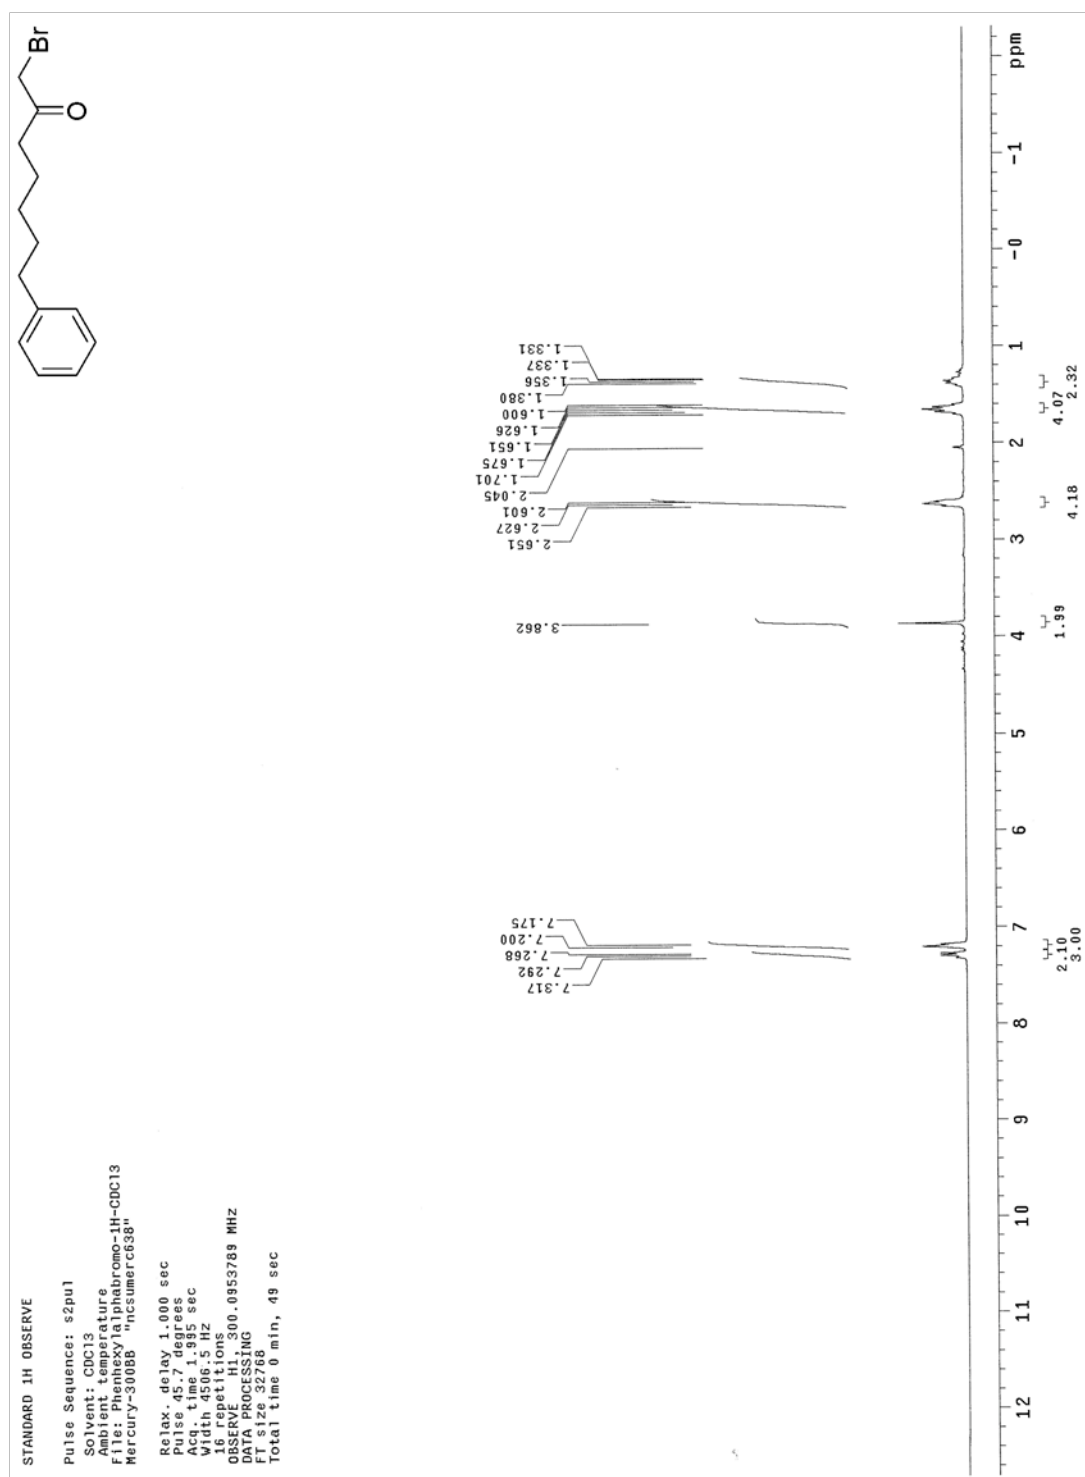

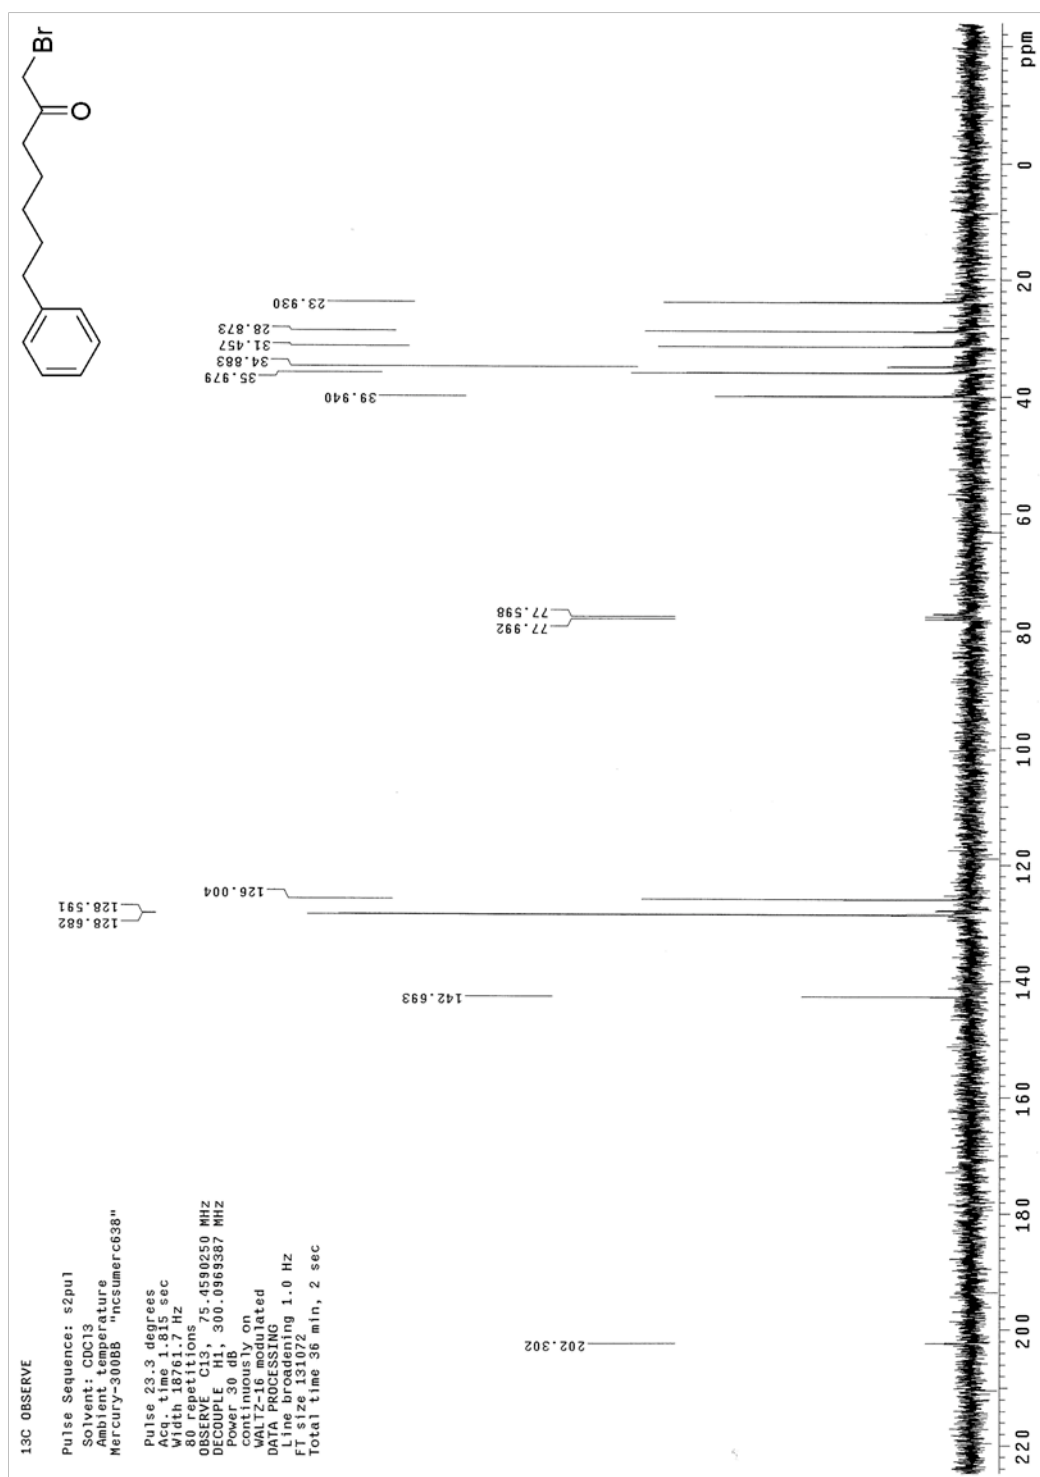

NMR data for monosubstituted-2-aminoimidazole

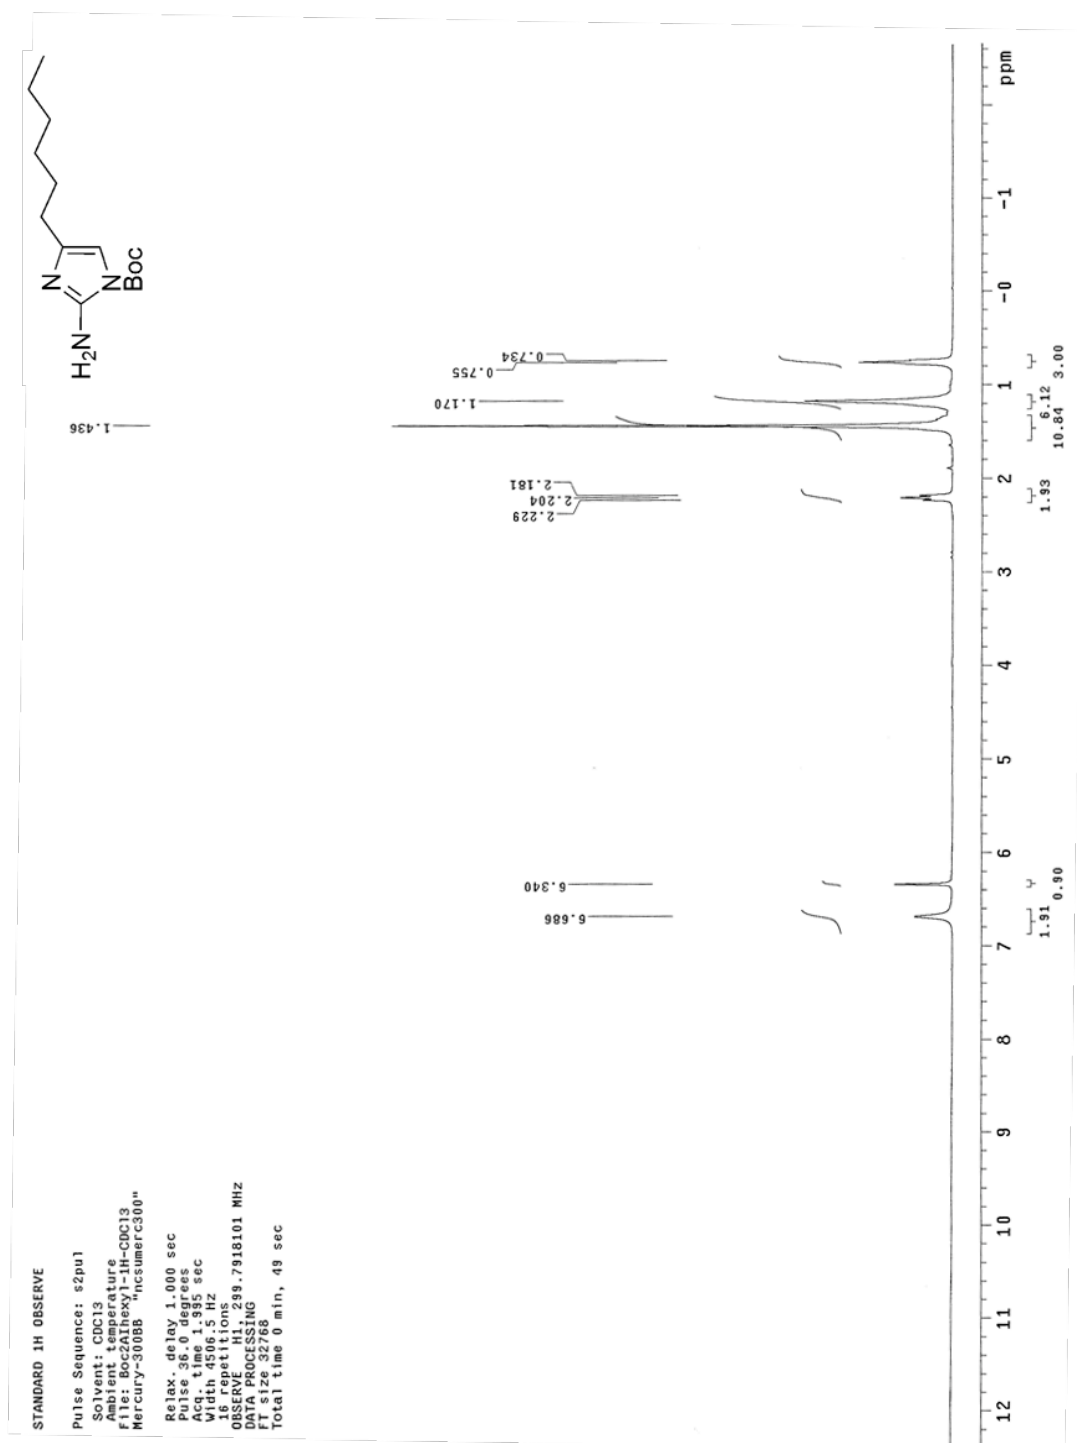



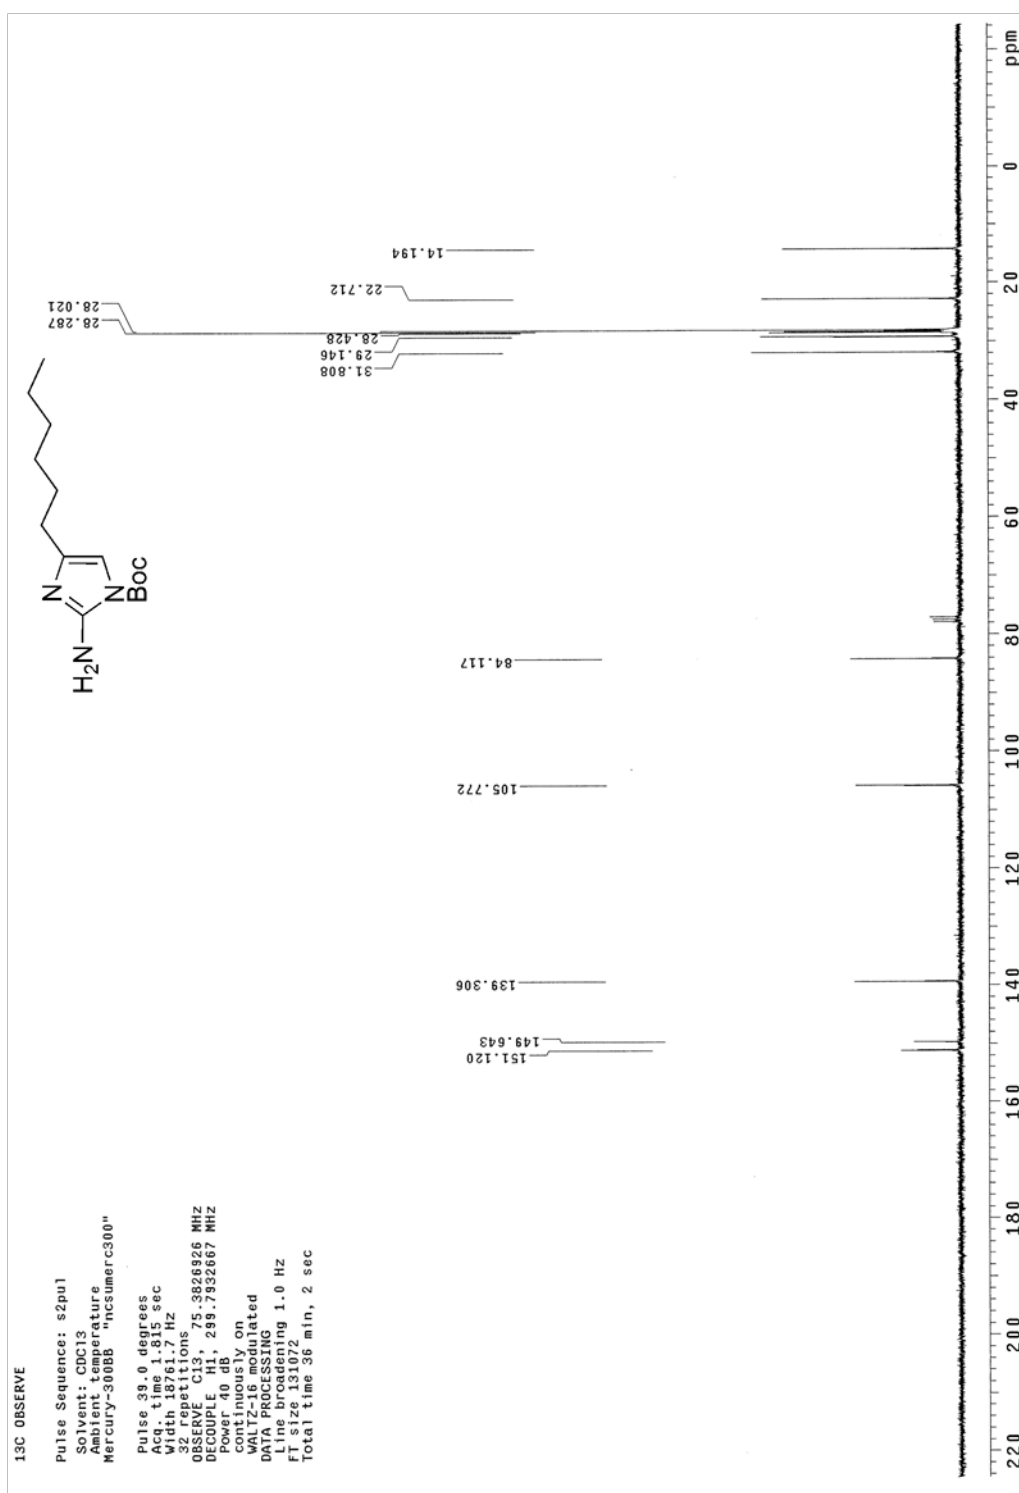

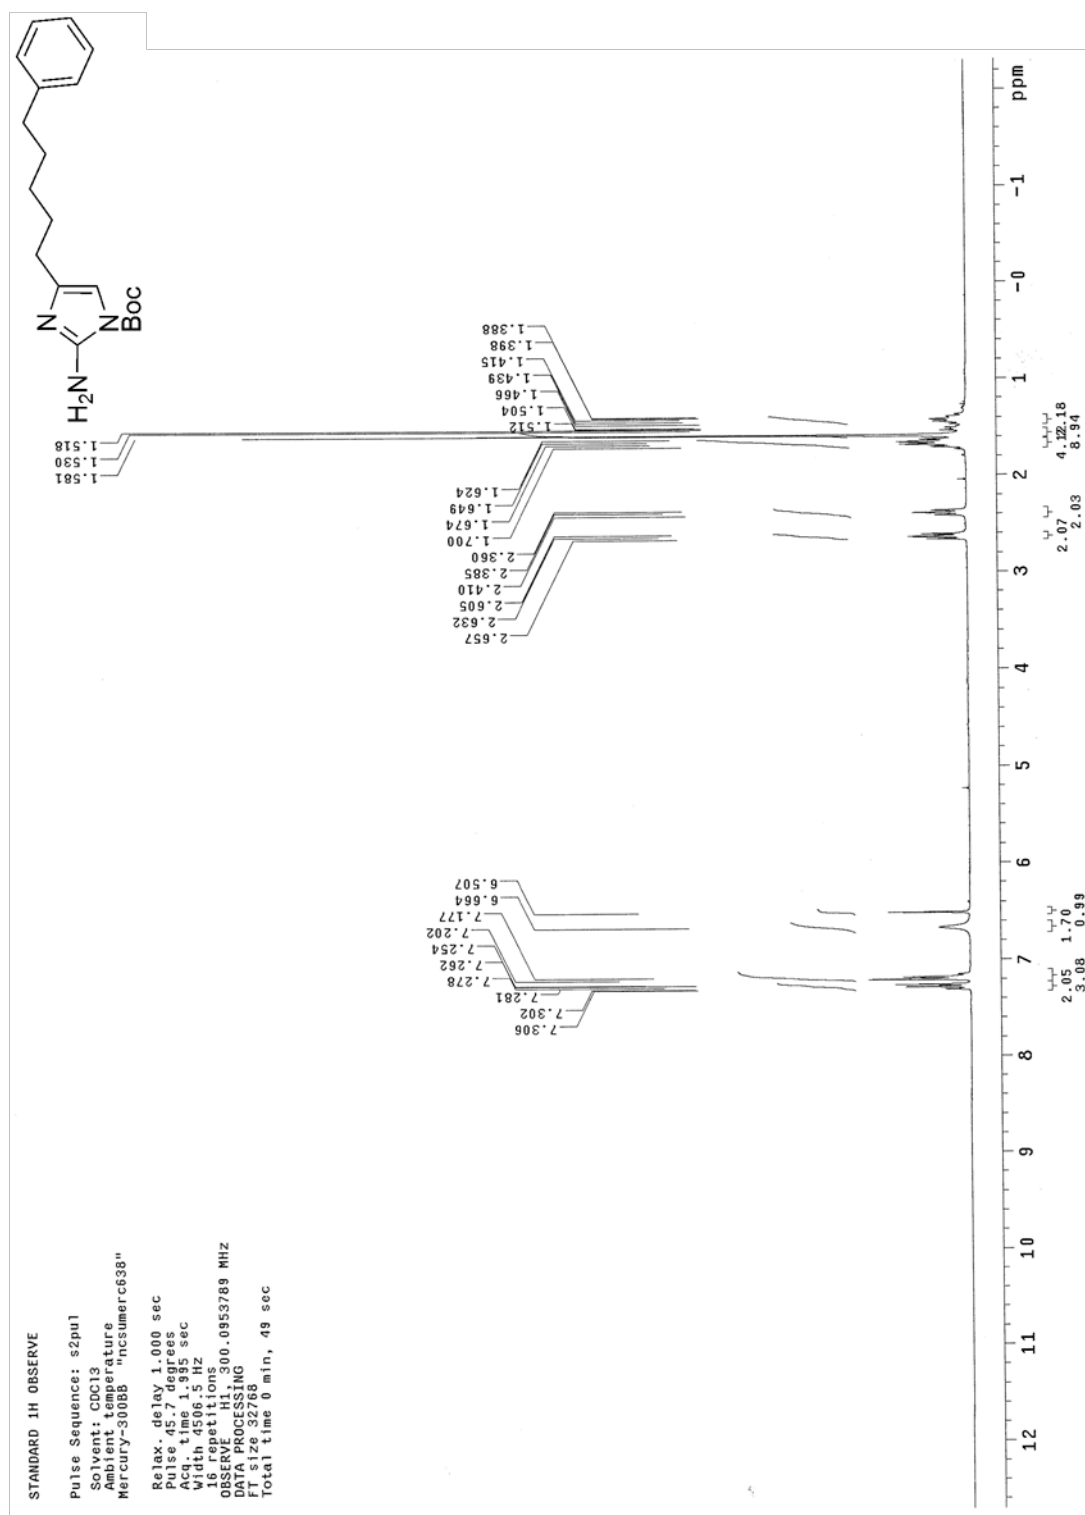

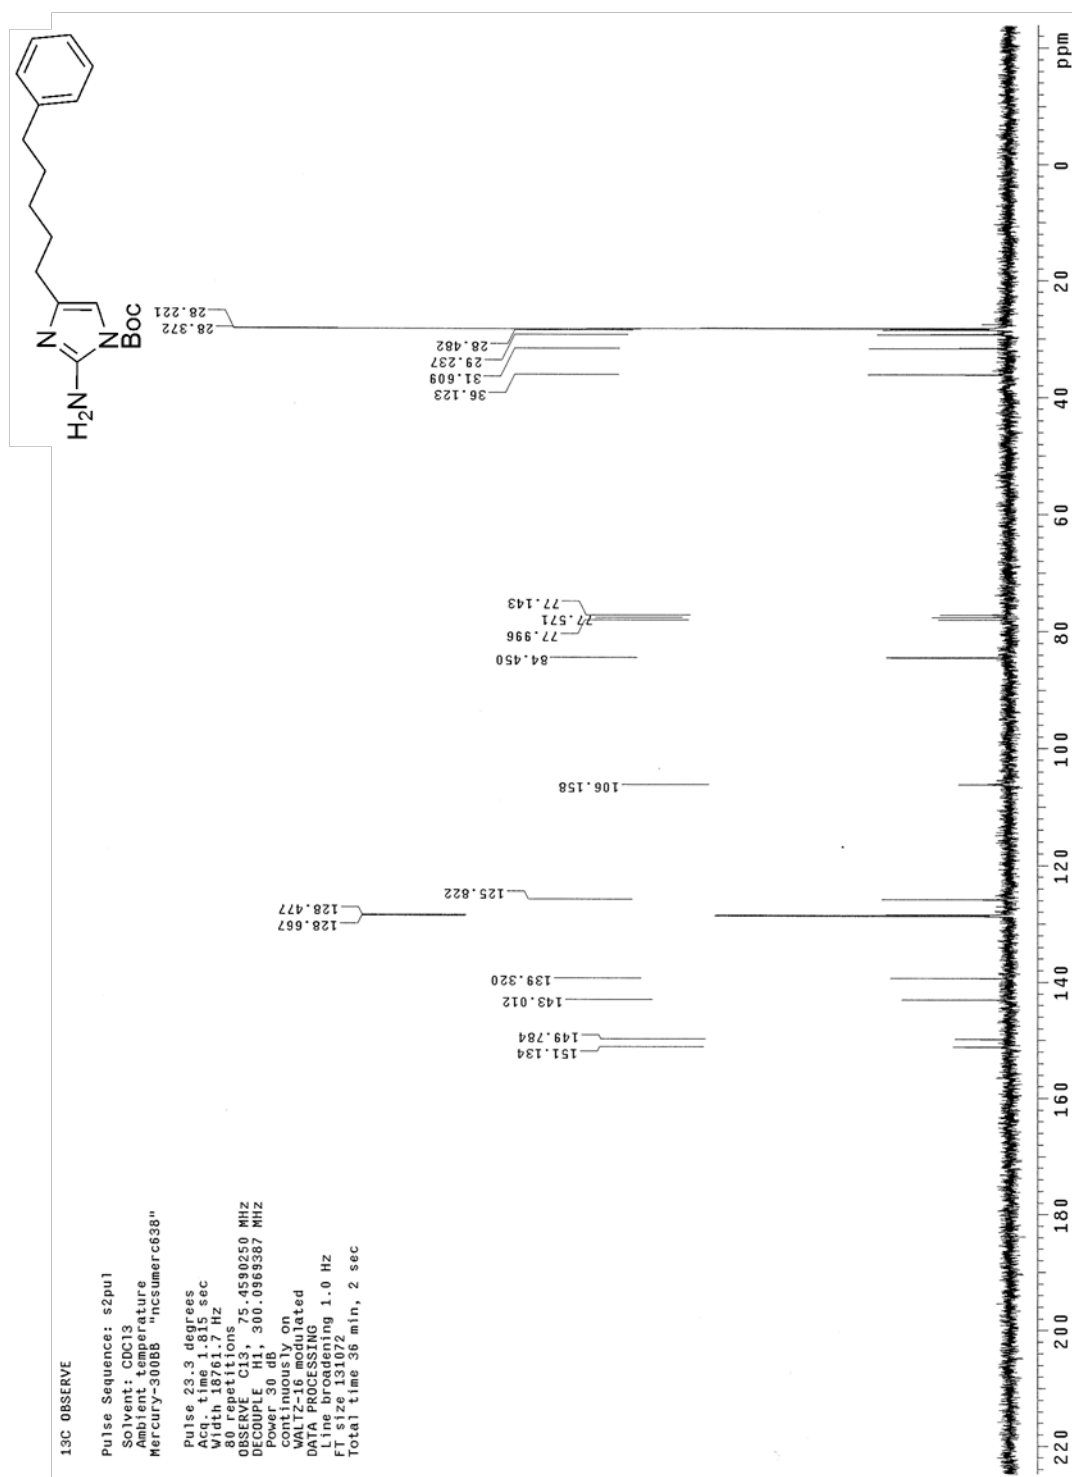

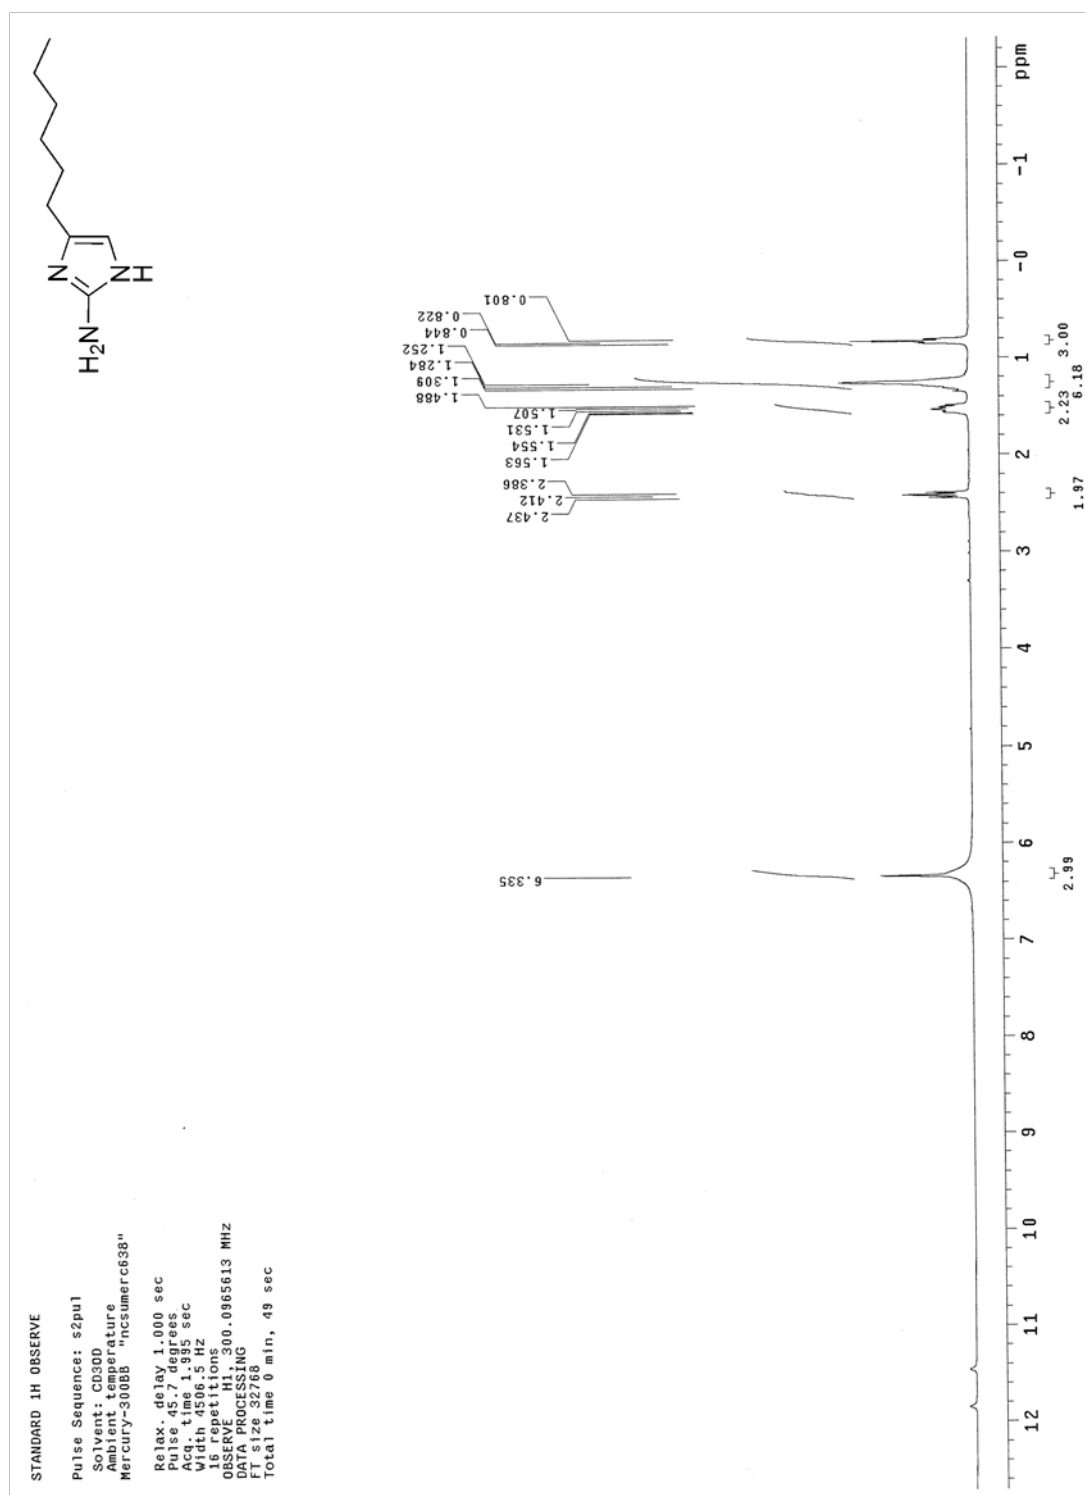

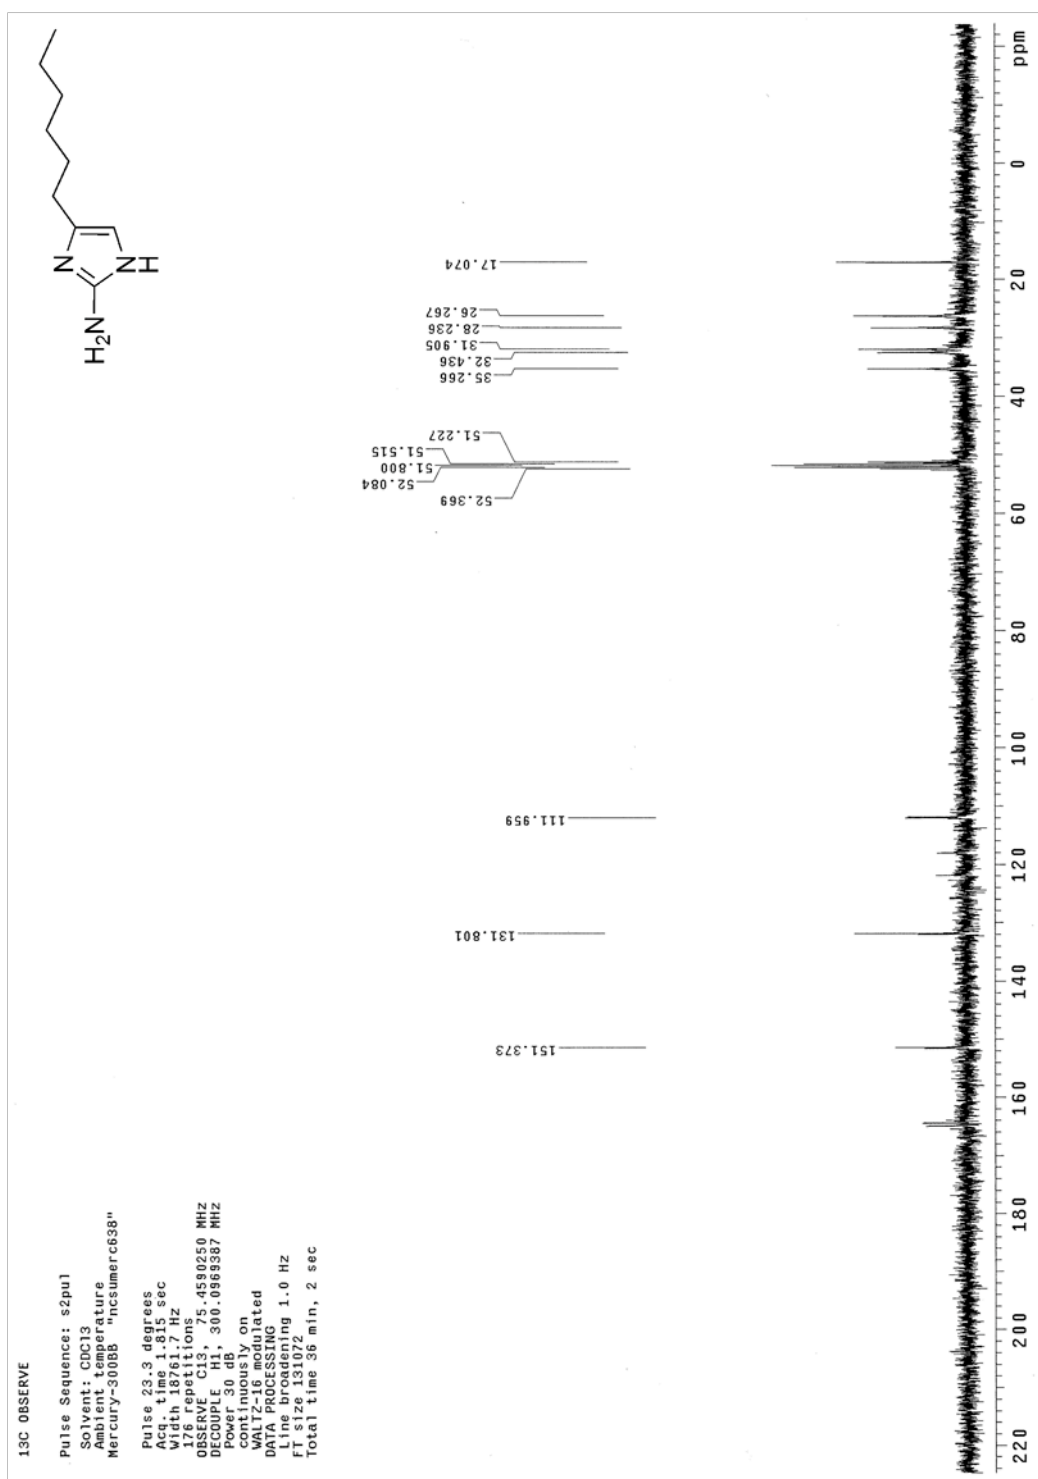

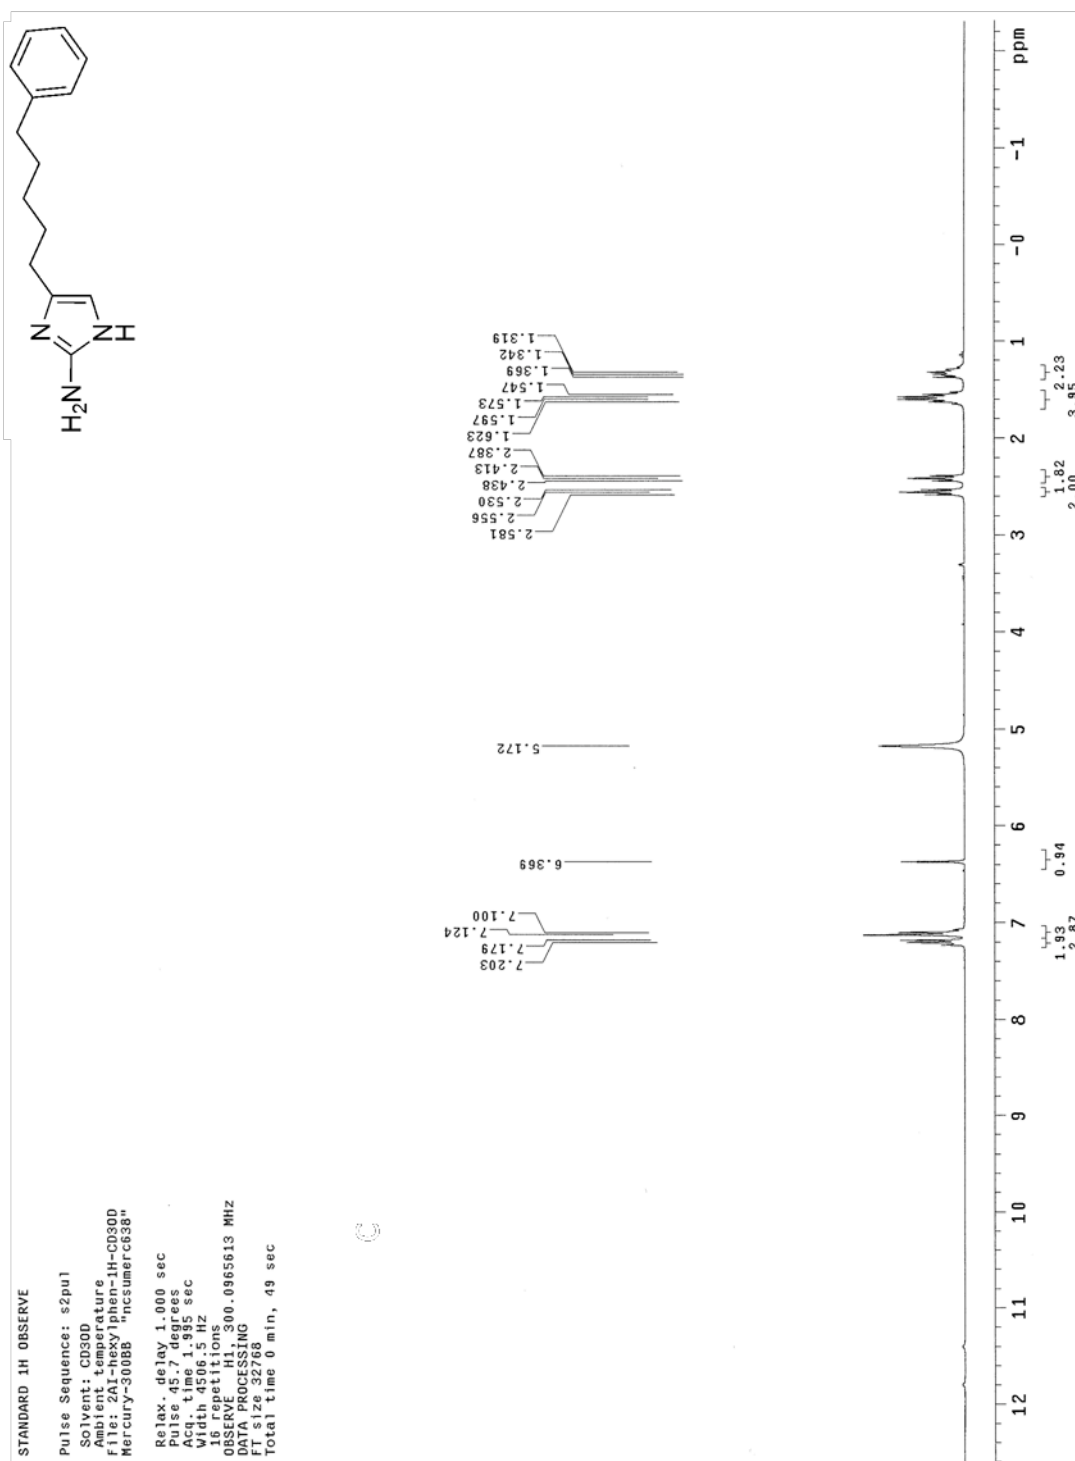



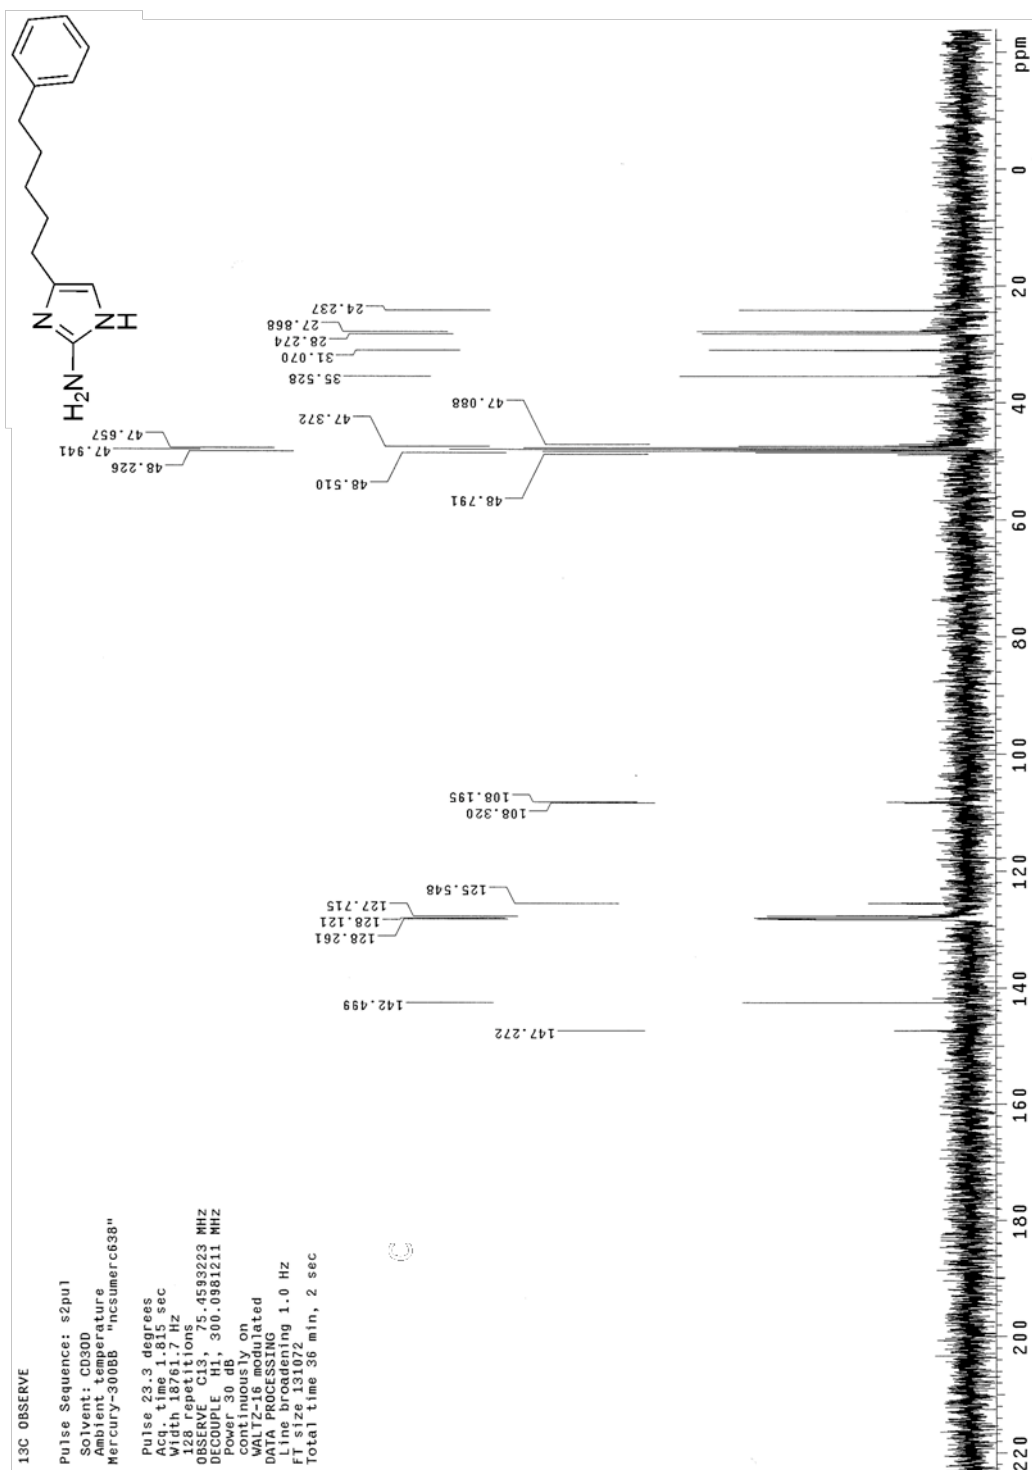

Supplement: c001479f.pdf [file c001479f.pdf]
